# Supplementary material for: A de novo Transcriptome Assembly of the European Flounder (Platichthys flesus): The Preselection of Transcripts Encoding Active Forms of Enzymes
Source: Frontiers journal article supplement (doi:10.3389/fmars.2021.618779), 2021-02-18
Supplement: Data_Sheet_1.PDF [file Data_Sheet_1.PDF]

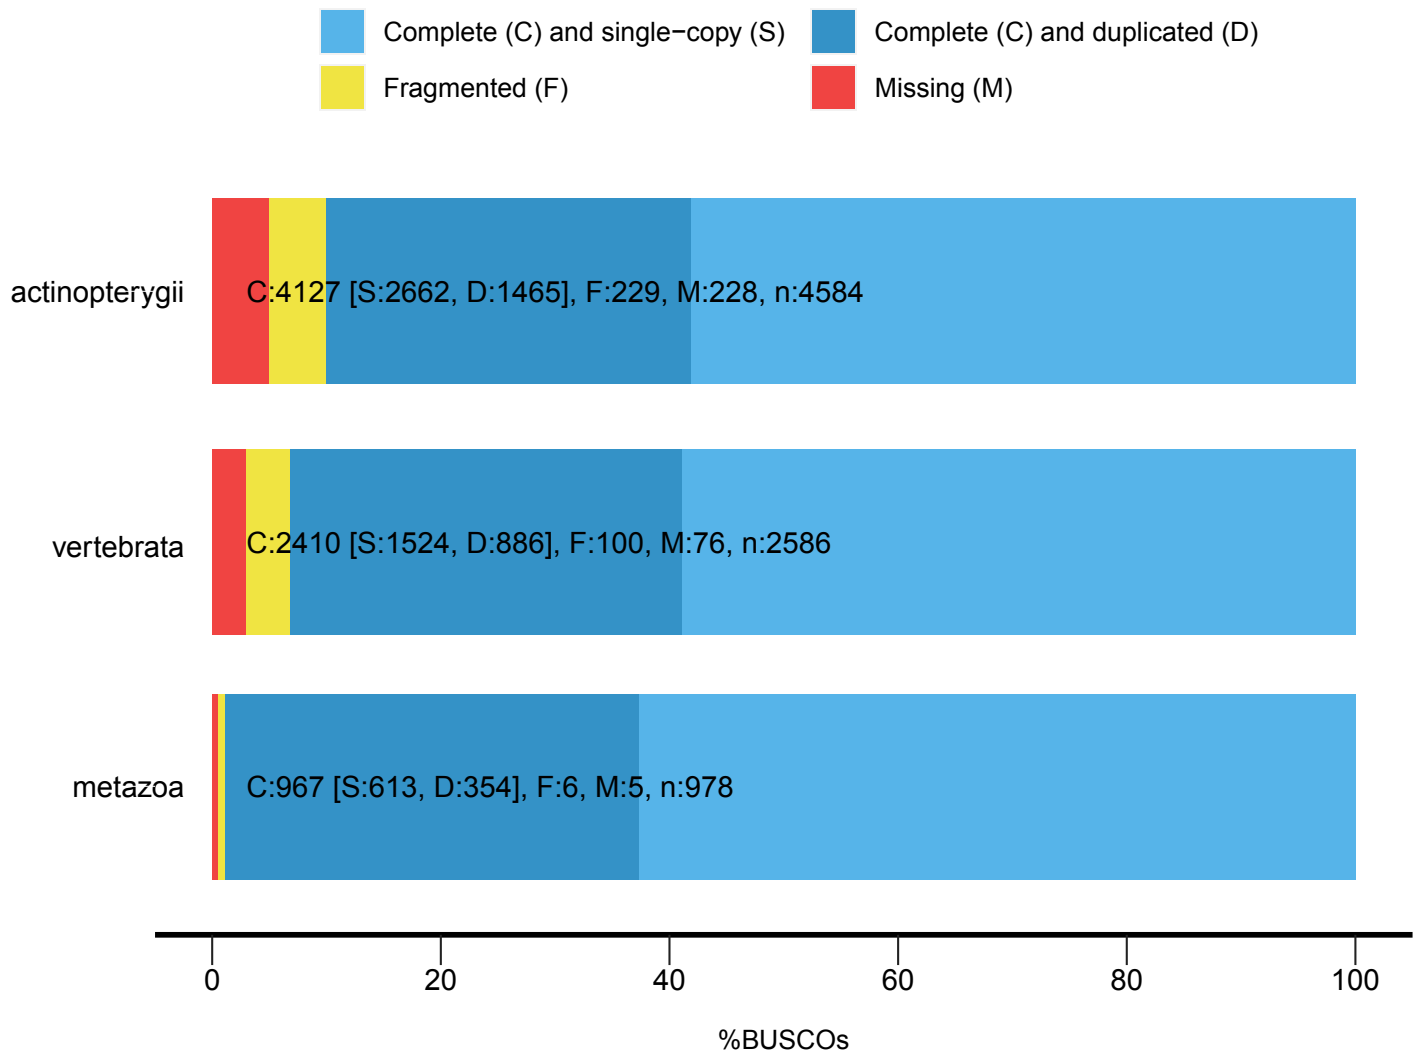

Supplementary Figure 1. BUSCO assesment of assembly completeness. The final filtered assembly (75k contigs) was compared with the three reference sets of BUSCOs, as defined in [www.orthodb.org](http://www.orthodb.org) database version 9. For the smallest, metazoan data set only 5 genes were not found in the assembly out of the 978 searched for, indicating good completeness of the assembly
