# Supplementary material for: A de novo Transcriptome Assembly of the European Flounder (Platichthys flesus): The Preselection of Transcripts Encoding Active Forms of Enzymes
Source: Frontiers journal article supplement (doi:10.3389/fmars.2021.618779), 2021-02-18
Supplement: Data_Sheet_5.PDF [file Data_Sheet_5.PDF]

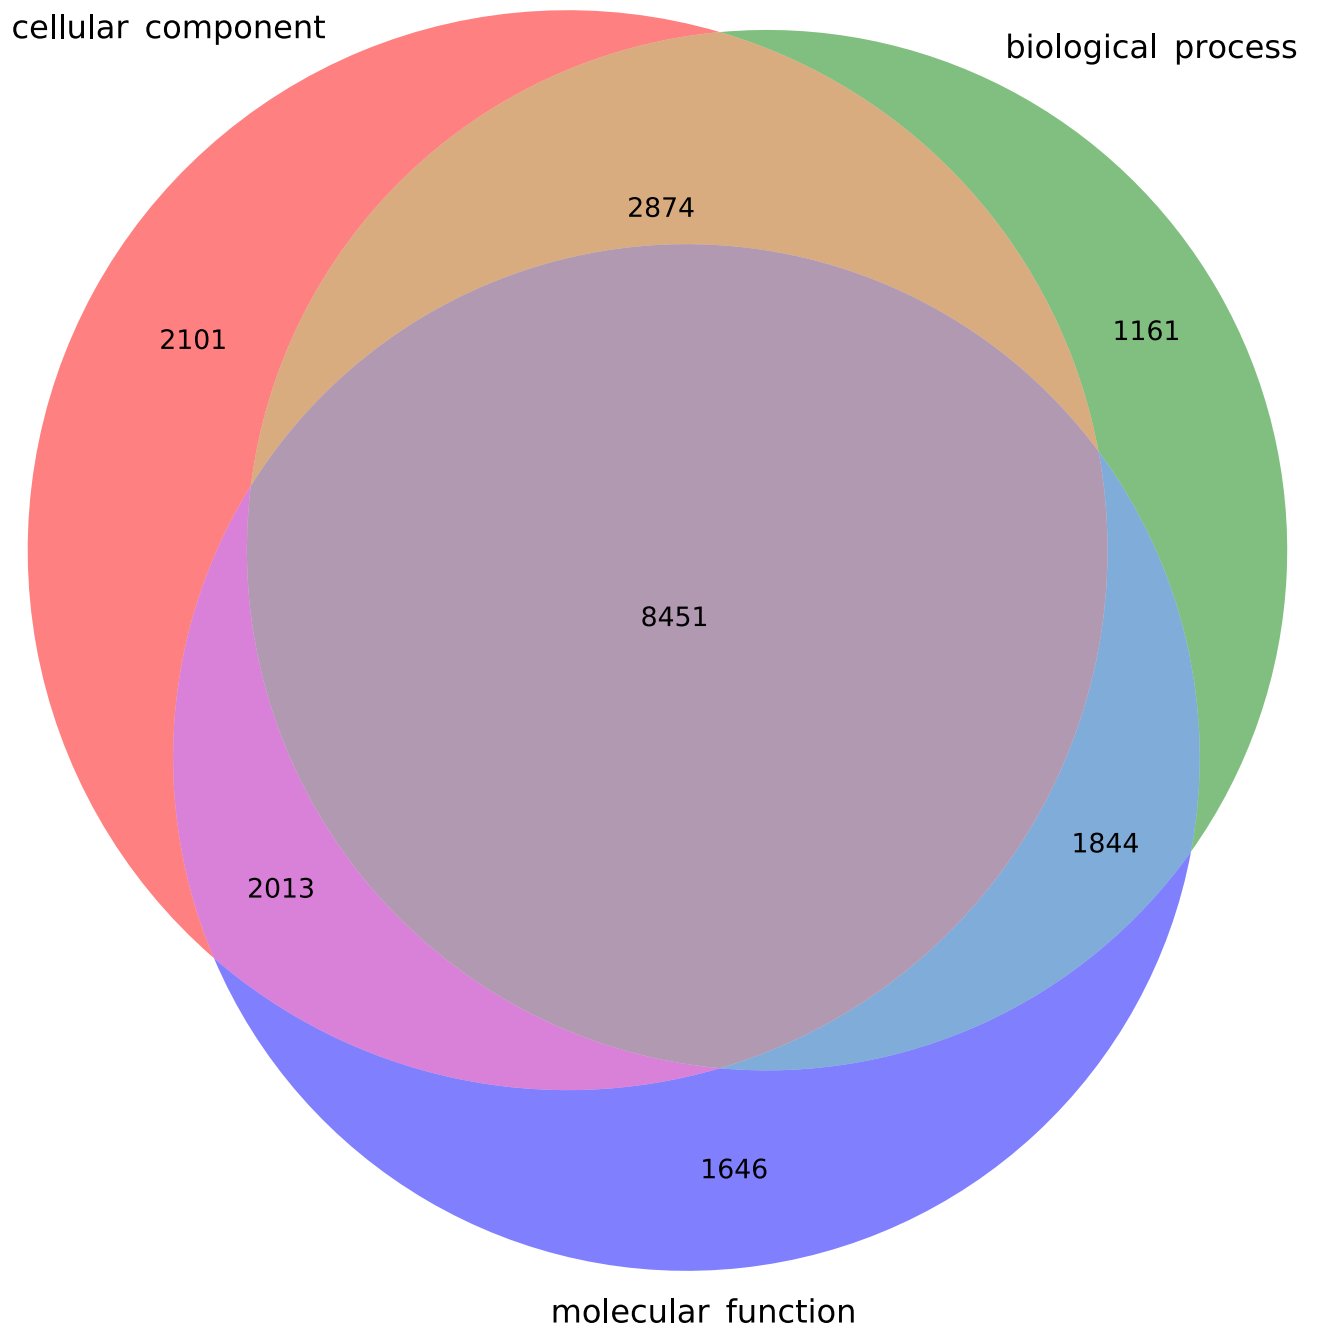

Supplementary Figure 3. Functional annotation of the assembly. There were 37956 unigenes in the final assembly consisting of 75017 contigs. Out of these, 20090 unigenes were assigned at least one Gene Ontology (GO) term. The Venn diagram shows the distribution of unigenes among the three GO categories: cellular component, biological process and molecular function. The colored areas are proportional to the number of unigenes with respective assignments.
