# Supplementary material for: A de novo Transcriptome Assembly of the European Flounder (Platichthys flesus): The Preselection of Transcripts Encoding Active Forms of Enzymes
Source: Frontiers journal article supplement (doi:10.3389/fmars.2021.618779), 2021-02-18
Supplement: Table_1.XLSX [file Table_1.XLSX]

## Sheet: TPM
transcript ID	annotation	G	jel	Mozg	Ngl	oko	se	skd	skg	sled	W	average	length	#ORF	GO terms
TRINITY_DN10838_c4_g1_i5	COX2	3688.31	7251.46	12263.1	11469.7	17103.1	17871.2	21888.7	7452.69	4214.02	6410.74	10961.3	770	1	0015075,0015077,0015078,0070069,0009060,0045277,0045333,0015980,0005751,0009987,0006091,0016491,0015002,0005575,0055114,0022857,0098803,0098800,0003824,0019646,0044237,0022890,0008150,0016676,0006123,0016675,0098796,0008324,0003674,0009055,0004129,0022900,0022904,0032991
TRINITY_DN10838_c4_g1_i7	COX3	3260.93	7906.67	10146.2	10593.8	15871.4	12441.4	17486.4	6031.31	4565.85	6150.7	9445.47	786	1	0015075,0015077,0015078,0070069,0009060,0045277,0045333,0015980,0005751,0009987,0006091,0016491,0015002,0005575,0055114,0022857,0098803,0098800,0003824,0019646,0044237,0022890,0008150,0016676,0006123,0016675,0098796,0008324,0003674,0009055,0004129,0022900,0022904,0032991
TRINITY_DN10838_c4_g1_i4	COX1	1907.24	5786	10240.9	10551.2	14926.1	8157.6	14369.5	6216.52	2926.76	6776.92	8185.88	1679	1	0015075,0015077,0015078,0070069,0009060,0045277,0045333,0015980,0005751,0009987,0006091,0016491,0015002,0005575,0055114,0022857,0098803,0098800,0003824,0019646,0044237,0022890,0008150,0016676,0006123,0016675,0098796,0008324,0003674,0009055,0004129,0022900,0022904,0032991
TRINITY_DN10838_c4_g1_i12	CYTB	900.974	2119.33	2290.42	3352.34	5560.59	3374.26	7389.1	2644.37	1323.09	1515.59	3047.01	1144	1	0070069,1902494,0045275,0005750,0009987,0006091,0008121,0016491,0005575,1990204,0055114,0098803,0098800,0016681,0003824,0044237,0008150,0006122,0032991,0098796,0016679,0003674,0009055,0022900,0022904
TRINITY_DN10838_c4_g1_i6	ATP8_ATP6	733.27	1284.39	2209.65	2409.35	3257.74	1730.97	5250.4	1829.67	1144.9	850.874	2070.12	916	2	0015075,0051234,0015077,1901293,0009144,0098660,1901137,0009201,0015078,0046390,0003674,0006812,0072521,0009152,0009150,0015985,0046034,0098662,0006807,0009117,0044249,0034654,0055085,0046483,0055086,0009987,0009199,0008150,0006139,0072522,0006796,0019693,0022890,0005575,0017144,0006754,0018130,1901566,0071704,1901135,1901362,1901360,0019438,0022857,0051179,0098800,0090407,0034220,0000276,0009205…
TRINITY_DN10838_c4_g1_i8	ND3	366.091	701.016	1468.41	1624.07	2790.38	1681.56	2634.5	1054.33	650.208	458.078	1342.86	422	1	0050136,0042653,0003954,0009987,0006091,0016491,0098796,0005575,0055114,0098803,0098800,0003824,0044237,0008150,0032991,0006120,0008137,0016651,0003674,0016655,0022900,0022904
TRINITY_DN10838_c4_g1_i11	ND6	266.093	639.428	1172.81	1280.21	1943.96	1570.77	2958.38	880.047	594.283	874.457	1218.04	593	1	0050136,0042653,0003954,0009987,0006091,0016491,0098796,0005575,0055114,0098803,0098800,0003824,0044237,0008150,0032991,0006120,0008137,0016651,0003674,0016655,0022900,0022904
TRINITY_DN10838_c4_g1_i2	ND1	153.796	545.85	769.502	1260.49	1470.42	1047.46	2122.88	847.376	369.857	392.553	898.019	1080	1	0050136,0042653,0003954,0009987,0006091,0016491,0098796,0005575,0055114,0098803,0098800,0003824,0044237,0008150,0032991,0006120,0008137,0016651,0003674,0016655,0022900,0022904
TRINITY_DN10838_c4_g1_i14	12S	174.859	345.203	1900.56	805.902	1814.29	1077.47	1048.41	184.907	335.257	186.904	787.376	1017	0
TRINITY_DN10838_c4_g1_i1	16S	240.942	194.087	1376.17	1938.32	1410.64	1239.1	436.593	283.149	379.819	129.833	762.865	1677	0
TRINITY_DN10838_c4_g1_i3	ND2	190.971	490.754	600.206	950.051	1626.62	801.331	1444.02	786.109	307.121	263.237	746.042	1127	1	0050136,0042653,0003954,0009987,0006091,0016491,0098796,0005575,0055114,0098803,0098800,0003824,0044237,0008150,0032991,0006120,0008137,0016651,0003674,0016655,0022900,0022904
TRINITY_DN10838_c4_g1_i9	ND4L_ND4	253.933	488.345	693.78	697.492	1184.05	872.077	1217.46	446.676	241.495	429.081	652.439	1742	2	0050136,0042653,0003954,0009987,0006091,0016491,0098796,0005575,0055114,0098803,0098800,0003824,0044237,0008150,0032991,0006120,0008137,0016651,0003674,0016655,0022900,0022904
TRINITY_DN10838_c4_g1_i10	ND5	55.949	236.287	213.825	261.179	466.907	319.005	446.233	193.145	101.057	218.284	251.187	2053	1	0050136,0042653,0003954,0009987,0006091,0016491,0098796,0005575,0055114,0098803,0098800,0003824,0044237,0008150,0032991,0006120,0008137,0016651,0003674,0016655,0022900,0022904
TRINITY_DN10838_c4_g1_i13	CR	4.095	23.747	108.583	47.925	158.513	56.625	76.712	14.138	11.977	26.869	52.9184	1593	0
TRINITY_DN1377_c0_g1_i69	Vitellogenin	0	0	0.257	0	0.082	2.678	0.337	0.271	13.105	212963	21298	973	1	0033993,0005319,0003674,0009725,1901700,0032355,0010033,0008150,0014070
TRINITY_DN1377_c0_g1_i77	Vitellogenin	0.008	0	0	0.105	0	0.223	0	0	0.13	55581.7	5558.22	5176	2	0033993,0005319,0005615,0005507,0003674,0110165,0009725,1901700,0014070,0043167,0043169,0005575,0046872,0032355,0010033,0008150,0046914
TRINITY_DN1377_c0_g1_i86	Vitellogenin	0	0	0	0	0	0	0	0	0	9303.96	930.396	5487	1	0033993,0005319,0003674,0009725,1901700,0032355,0010033,0008150,0014070
TRINITY_DN1377_c0_g1_i73	Vitellogenin	0	0	0	0	0	0	0	0	0	837.926	83.7926	1169	2	0033993,0005319,0003674,0009725,1901700,0032355,0010033,0008150,0014070
TRINITY_DN1377_c0_g1_i8	SI DKEY-4C23 3 -like	0	0	0	0	0.196	0	0	0	0.043	558.925	55.9164	1488	5	0033993,0005319,0003674,0009725,1901700,0032355,0010033,0008150,0014070
TRINITY_DN1377_c0_g1_i11	Vitellogenin	0	0	0	0	0	0	0	0.211	0	227.52	22.7731	5408	3	0033993,0005319,0003674,0009725,1901700,0032355,0010033,0008150,0014070
TRINITY_DN1377_c0_g1_i109	Vitellogenin	0	0	0	0	0	0	0	0	0	144.879	14.4879	3250	5	0033993,0051234,0006869,0071702,0005319,0051179,0003674,0009725,1901700,0032355,0010033,0008150,0014070
TRINITY_DN1377_c0_g1_i4	Vitellogenin	0	0	0	0	0.119	0	0	0	0	64.754	6.4873	3889	8	0033993,0051234,0006869,0071702,0005319,0051179,0003674,0009725,1901700,0032355,0010033,0008150,0014070
TRINITY_DN48539_c0_g1_i5	NDK domain-containing protein	0.748	6.903	5.251	0	83.484	30301.2	161023	531.96	0	0	19195.3	661	1	0044237,0009119,0046039,0046036,0009116,0009117,0009218,0009987,0009199,1901657,0019693,0018130,0046128,0046129,1901362,1901360,0009206,0009205,0009201,0044238,0009208,0009209,0006163,0009165,0009163,0006164,0009152,0006221,0006220,0006183,0006228,1901070,0046390,0019637,0019438,0016740,0044281,0044283,0072521,0072522,0072527,0072528,0006753,1901564,1901566,1901068,0009260,0008150,1901576,0009148…
TRINITY_DN48539_c0_g1_i16	NDK domain-containing protein	0	0.41	0	0	6.024	1986.45	6202.69	19.031	0	0	821.461	730	1	0044237,0009119,0046039,0046036,0009116,0009117,0009218,0009987,0009199,1901657,0019693,0018130,0046128,0046129,1901362,1901360,0009206,0009205,0009201,0044238,0009208,0009209,0006163,0009165,0009163,0006164,0009152,0006221,0006220,0006183,0006228,1901070,0046390,0019637,0019438,0016740,0044281,0044283,0072521,0072522,0072527,0072528,0006753,1901564,1901566,1901068,0009260,0008150,1901576,0009148…
TRINITY_DN48539_c0_g1_i3	NDK domain-containing protein	0	0	0	0	0	16.252	140.671	0.189	0.128	0	15.724	644	1	0044237,0009119,0046039,0046036,0009116,0009117,0009218,0009987,0009199,1901657,0019693,0018130,0046128,0046129,1901362,1901360,0009206,0009205,0009201,0044238,0009208,0009209,0006163,0009165,0009163,0006164,0009152,0006221,0006220,0006183,0006228,1901070,0046390,0019637,0019438,0016740,0044281,0044283,0072521,0072522,0072527,0072528,0006753,1901564,1901566,1901068,0009260,0008150,1901576,0009148…
TRINITY_DN48539_c0_g1_i17	NDK domain-containing protein	0.062	0	0	0	0.208	45.293	90.882	0.918	0	0	13.7363	1001	2	0044237,0009119,0046039,0046036,0009116,0009117,0009218,0009987,0009199,1901657,0019693,0018130,0046128,0046129,1901362,1901360,0009206,0009205,0009201,0044238,0009208,0009209,0006163,0009165,0009163,0006164,0009152,0006221,0006220,0006183,0006228,1901070,0046390,0019637,0019438,0016740,0044281,0044283,0072521,0072522,0072527,0072528,0006753,1901564,1901566,1901068,0009260,0008150,1901576,0009148…
TRINITY_DN48539_c0_g1_i13	NDK domain-containing protein	0	0	0	0	0	22.525	64.888	0.135	0	0	8.7548	757	1	0044237,0009119,0046039,0046036,0009116,0009117,0009218,0009987,0009199,1901657,0019693,0018130,0046128,0046129,1901362,1901360,0009206,0009205,0009201,0044238,0009208,0009209,0006163,0009165,0009163,0006164,0009152,0006221,0006220,0006183,0006228,1901070,0046390,0019637,0019438,0016740,0044281,0044283,0072521,0072522,0072527,0072528,0006753,1901564,1901566,1901068,0009260,0008150,1901576,0009148…
TRINITY_DN2880_c2_g1_i2	Ice-structuring protein A	0.168	2.732	0.197	0	4.789	2.051	64.741	106.15	9.953	63887.9	6407.87	460	1	0001659,0050826,0042802,0009409,0003674,0065008,0042309,0032501,0005575,0050825,0009266,0048871,0042592,0110165,0005615,0008150,0005515
TRINITY_DN2880_c2_g1_i8	TRINITY_DN2880_c2_g1_i8	0	0	2.804	0	1308.07	0.964	12309.3	25030	0	0	3865.12	383	0
TRINITY_DN2880_c2_g1_i19	TRINITY_DN2880_c2_g1_i19	0.197	8.235	11.757	1.71	1108.96	5.57	9241.18	12140.5	1.291	6.609	2252.6	423	0
TRINITY_DN2880_c2_g1_i20	TRINITY_DN2880_c2_g1_i20	0	0	0	0	0	0	2.06	2.805	0	777.145	78.201	473	0
TRINITY_DN2880_c2_g1_i11	TRINITY_DN2880_c2_g1_i11	0	0.314	0	0	0	0	0	0	0	63.38	6.3694	388	0
TRINITY_DN2880_c2_g1_i7	TRINITY_DN2880_c2_g1_i7	0.068	0.552	0.554	0.766	1.522	2.811	2.502	29.927	0.624	2.94	4.2266	830	0
TRINITY_DN2880_c2_g1_i16	TRINITY_DN2880_c2_g1_i16	0	0.178	0.077	0	0.786	0.182	3.229	10.617	0.086	0	1.5155	850	0
TRINITY_DN195_c15_g5_i2	rRNA transcript	5444.04	4915.89	9463.63	3526.45	4553.43	14961.7	16202.2	12169.3	29446.5	33785.9	13446.9	8940	0
TRINITY_DN695_c2_g2_i12	TRINITY_DN695_c2_g2_i12	3541.1	8257.73	8744.02	6791.15	5107.67	10253.4	10032	8236.67	9685.84	33118.2	10376.8	400	0
TRINITY_DN695_c2_g2_i19	TRINITY_DN695_c2_g2_i19	793.872	891.081	377.838	489.601	291.482	931.528	612.169	758.077	735.4	1444.6	732.565	569	0
TRINITY_DN695_c2_g2_i9	hypothetical protein	36.073	59.768	34.327	51.965	55.621	44.17	44.195	51.837	52.972	75.667	50.6595	508	1
TRINITY_DN695_c2_g2_i5	Ribosomal protein L41 family member	0.199	15.056	12.795	14.229	16.313	12.005	7.47	15.478	25.588	18.292	13.7425	730	1	0005840,0006412,0044271,0043604,0043603,0006807,0110165,0043043,0044249,0044267,0009987,0044260,0043229,0005575,1901564,0043232,1901576,0009058,0044237,0044238,0008150,0043170,0071704,0009059,0034641,0034645,0003735,0003674,0043228,0006518,0005198,0019538,1901566,0043226
TRINITY_DN695_c2_g2_i10	TRINITY_DN695_c2_g2_i10	0.546	12.336	12.256	11.238	7.429	9.954	8.068	13.225	12.363	12.881	10.0296	1119	0
TRINITY_DN695_c2_g2_i2	TRINITY_DN695_c2_g2_i2	0.156	10.971	9.133	11.884	7.719	10.196	4.873	11.054	11.474	9.696	8.7156	1152	0
TRINITY_DN626_c2_g1_i14	zona pellucida sperm-binding protein 4-like	0	0	0	6.252	0	0.587	0.127	0.514	3.582	63702	6371.3	1553	1
TRINITY_DN626_c2_g1_i18	zona pellucida sperm-binding protein 4-like	0	0	0	0.856	0	0.053	0	0.046	0.251	10736.2	1073.74	1873	1
TRINITY_DN626_c2_g1_i15	plant gibberellin 2-oxidase	0	0	0	0.077	0	0	0	0.073	0	6843.68	684.383	974	1	0009416,0009314,0003674,0016491,0003824,0008150,0051213
TRINITY_DN626_c2_g1_i7	zona pellucida sperm-binding protein 4-like	0	0	0	0	0	0	0	0	0	2767.93	276.793	1998	1
TRINITY_DN626_c2_g1_i4	TRINITY_DN626_c2_g1_i4	0	0	0	0	0	0	0	0	0	1829.61	182.96	507	0
TRINITY_DN626_c2_g1_i13	TRINITY_DN626_c2_g1_i13	0	0	0	0	0	0	0	0	0	1667.75	166.775	475	0
TRINITY_DN626_c2_g1_i1	plant gibberellin 2-oxidase	0	0	0	0	0	0	0	0	0	394.889	39.4889	359	0
TRINITY_DN626_c2_g1_i12	Zona pellucida protein	0	0	0	0	0	0	0	0	0	100.436	10.0436	2034	1
TRINITY_DN2245_c0_g1_i8	Choriogenin L	1.459	0.113	11.29	3.245	7.01	2.522	3.555	4.891	3.475	81400.1	8143.77	1717	1	0009988,0009987,0003674,0031012,0007340,0008037,0007339,0005198,0005575,0035803,0022414,0110165,0035036,0008150,0022412,0035804
TRINITY_DN2245_c0_g1_i2	Choriogenin L	0	0	0	0	0	0.18	0	0	0	2316.74	231.692	1979	1	0009988,0009987,0003674,0031012,0007340,0008037,0007339,0005198,0005575,0035803,0022414,0110165,0035036,0008150,0022412,0035804
TRINITY_DN2245_c0_g1_i9	Zona pellucida sperm-binding protein 3	0	0.041	0.544	0.464	0.973	0	0	0.863	0.843	742.62	74.6348	1589	2	0009988,0009987,0003674,0031012,0007340,0008037,0007339,0005198,0005575,0035803,0022414,0110165,0035036,0008150,0022412,0035804
TRINITY_DN2245_c0_g1_i4	ZP domain-containing protein	0.049	0	0	0.143	0.147	0.146	0	0	0.419	64.882	6.5786	1225	2	0009988,0009987,0003674,0031012,0007340,0008037,0007339,0005198,0005575,0035803,0022414,0110165,0035036,0008150,0022412,0035804
TRINITY_DN2245_c0_g1_i3	Choriogenin L	0	0	0.35	0.045	0.227	0	0.249	0.152	0.046	50.751	5.182	2562	4	0009988,0009987,0003674,0031012,0007340,0008037,0007339,0005198,0005575,0035803,0022414,0110165,0035036,0008150,0022412,0035804
TRINITY_DN11816_c2_g1_i1	slow myosin heavy chain 1	1.414	0	0.904	1.478	199.361	0	62507.4	34.403	0.676	0	6274.57	548	1	0006996,0016818,0007010,0016817,0030554,0051015,0097159,0031032,0043167,0043168,0018210,0097367,0006807,0044260,0006796,0008144,0005737,0043412,0032559,0030036,0044267,0032555,0009987,0140096,1901265,0016459,0006468,0110165,0000166,0006793,0016310,0044877,1901564,0005515,0016787,0071704,1901363,0003824,0017076,0016740,0003774,0018193,0044237,0044238,0003779,0008150,0043170,0016462,0017111,0032991…
TRINITY_DN11816_c2_g1_i2	slow myosin heavy chain 1	0	0	0	0	1.048	0	31.105	0	0	0	3.2153	634	1	0006996,0016818,0007010,0016817,0030554,0051015,0097159,0031032,0043167,0043168,0018210,0097367,0006807,0044260,0006796,0008144,0005737,0043412,0032559,0030036,0044267,0032555,0009987,0140096,1901265,0016459,0006468,0110165,0000166,0006793,0016310,0044877,1901564,0005515,0016787,0071704,1901363,0003824,0017076,0016740,0003774,0018193,0044237,0044238,0003779,0008150,0043170,0016462,0017111,0032991…
TRINITY_DN11919_c0_g1_i11	60S ribosomal protein L36a-like	1414.01	3535.67	3245.79	4523.48	1936.39	5360.71	6294.52	5077.66	6767.9	12044.7	5020.08	483	1	0005840,0006412,0044271,0043604,0043603,0006807,0110165,0043043,0044249,0044267,0009987,0044260,0043229,0005575,1901564,0043232,1901576,0009058,0044237,0044238,0008150,0043170,0071704,0009059,0034641,0034645,0003735,0003674,0043228,0006518,0005198,0019538,1901566,0043226
TRINITY_DN11919_c0_g1_i10	60S ribosomal protein L36a	25.165	0	2.583	0.405	0	4.998	6.673	5.086	1.345	7.778	5.4033	572	1	0005840,0006412,0044271,0043604,0043603,0006807,0044260,0043043,0044249,0044267,0009987,0110165,0006518,0005575,1901564,0043232,1901576,0009058,0044237,0044238,0008150,0043170,0071704,0009059,0034641,0034645,0003735,0003674,0043228,0043229,0005198,0019538,1901566,0043226
TRINITY_DN4184_c0_g1_i4	60S acidic ribosomal protein P2-like	1683.48	3466.74	3445.12	3840.06	2044.63	4285.96	3949.65	5049.7	7284.02	14715	4976.43	460	1
TRINITY_DN319_c1_g2_i1	complement component c3a, duplicate 1 -related	5.234	0	0	3.243	0	0	0	0	0	40559.7	4056.81	241	1	0006959,0002376,0002684,0002682,0002252,0002253,0006956,0050778,0006955,0005575,0050776,0110165,0005615,0008150
TRINITY_DN319_c1_g2_i2	complement component c3a, duplicate 1 -related	0.044	0	0	0	0.067	0	0	0	0.117	1351.15	135.138	1153	1	0006959,0002376,0002684,0002682,0002252,0002253,0006956,0050778,0006955,0005575,0050776,0110165,0005615,0008150
TRINITY_DN7116_c0_g1_i2	40S ribosomal protein S8	1686.85	2911.32	2436.88	3371.29	2033.1	6316.42	6523.21	5645.2	5169.68	8550.25	4464.42	676	1	0030490,0000462,0006364,0090304,0006807,0034470,0044391,0022627,1990904,0046483,0016070,0009987,0016072,0006139,0005575,0006396,1901360,0044237,0044238,0008150,0043170,0006725,0071704,0034641,0015935,0032991,0034660
TRINITY_DN7116_c0_g1_i1	40S ribosomal protein S8	60.834	14.202	14.923	21.986	24.889	11.427	26.767	14.698	28.231	21.644	23.9601	565	1	0030490,0000462,0006364,0090304,0006807,0034470,0044391,0022627,1990904,0046483,0016070,0009987,0016072,0006139,0005575,0006396,1901360,0044237,0044238,0008150,0043170,0006725,0071704,0034641,0015935,0032991,0034660
TRINITY_DN132_c5_g1_i1	cardiac myosin light chain-1	0.273	0.82	1.089	13.124	4.927	44880	1.233	0.507	44.129	8.776	4495.49	975	1
TRINITY_DN235_c1_g1_i2	60S ribosomal protein L39 suspicious taxon	1899.77	3279.95	2433.67	4419.4	1750.14	3831.72	4347.81	4833.29	5304.63	11488.7	4358.91	393	1	0005840,0006412,0044271,0043604,0043603,0006807,0044260,0043043,0044249,0044267,0009987,0110165,0006518,0005575,1901564,0043232,1901576,0009058,0044237,0044238,0008150,0043170,0071704,0009059,0034641,0034645,0003735,0003674,0043228,0043229,0005198,0019538,1901566,0043226
TRINITY_DN7366_c0_g1_i1	Putative 14 kDa apolipoprotein	0	0	4410.08	0	30.248	0.307	10.663	0	1.559	33659.2	3811.2	777	1
TRINITY_DN7366_c0_g1_i4	Putative 14 kDa apolipoprotein	0	0	1.493	0	0	0	0	0	0	167.671	16.9164	1476	2
TRINITY_DN7366_c0_g1_i10	TRINITY_DN7366_c0_g1_i10	0	0	0	0	0	0	0	0	0	161.298	16.1298	244	0
TRINITY_DN7366_c0_g1_i9	Putative 14 kDa apolipoprotein	0	0	1.935	0	0	0	0	0	0	143.859	14.5794	1136	1
TRINITY_DN7366_c0_g1_i6	Putative 14 kDa apolipoprotein	0	0	2.781	0	0.204	0	0	0	0	121.922	12.4907	997	2
TRINITY_DN7366_c0_g1_i7	Putative 14 kDa apolipoprotein	0	0	9.272	0	0	0	0	0	0	33.113	4.2385	898	1
TRINITY_DN9903_c0_g1_i21	60S ribosomal protein L34	1129.45	3351.57	2484	3397.07	1608.54	4607.53	4531.96	4744.81	6684.24	10008	4254.71	397	1	0005840,0006412,0044271,0043604,0043603,0006807,0044260,0043043,0044249,0044267,0009987,0110165,0006518,0005575,1901564,0043232,1901576,0009058,0044237,0044238,0008150,0043170,0071704,0009059,0034641,0034645,0003735,0003674,0043228,0043229,0005198,0019538,1901566,0043226
TRINITY_DN9903_c0_g1_i9	60S ribosomal protein L34	17.924	38.346	31.463	58.95	20.76	23.197	84.026	88.383	67.897	125.751	55.6697	1612	2	0005840,0006412,0044271,0043604,0043603,0006807,0044260,0043043,0044249,0044267,0009987,0110165,0006518,0005575,1901564,0043232,1901576,0009058,0044237,0044238,0008150,0043170,0071704,0009059,0034641,0034645,0003735,0003674,0043228,0043229,0005198,0019538,1901566,0043226
TRINITY_DN9903_c0_g1_i8	60S ribosomal protein L34	3.822	30.05	18.083	19.993	18.65	45.041	19.73	28.577	74.564	38.642	29.7152	1500	2	0005840,0006412,0044271,0043604,0043603,0006807,0044260,0043043,0044249,0044267,0009987,0110165,0006518,0005575,1901564,0043232,1901576,0009058,0044237,0044238,0008150,0043170,0071704,0009059,0034641,0034645,0003735,0003674,0043228,0043229,0005198,0019538,1901566,0043226
TRINITY_DN2596_c1_g1_i8	Myosin light chain, phosphorylatable, fast skeletal muscle	0.285	0.049	0.167	0.351	15.619	0	30672.4	116.598	1.084	0	3080.65	1378	1	0043169,0046872,0005509,0003674,0043167
TRINITY_DN2596_c1_g1_i6	myosin regulatory light chain 2, skeletal muscle	0	0	0	0	0	0.041	3175.91	22.662	0	0	319.862	1624	2	0043169,0046872,0005509,0003674,0043167
TRINITY_DN2596_c1_g1_i2	Myosin light chain, phosphorylatable, fast skeletal muscle	0	0	0	0.097	0.052	0	1435.83	15.827	0	0	145.18	1416	1	0043169,0046872,0005509,0003674,0043167
TRINITY_DN13024_c1_g3_i1	Rhodopsin	0	0	0.339	0	45622.6	0.135	0.131	0	0.042	0	4562.32	1506	1	0009416,0005887,0009314,0009987,0104004,0007186,0110165,0071478,0005623,0031226,0050794,0031224,0005575,0016021,0007165,0008150,0071482
TRINITY_DN2650_c1_g1_i6	actin, aortic smooth muscle	17.201	2.892	0	4.379	8.342	17081.7	931.013	4.727	0	0	1805.02	295	1	0005856,0099568,0015629,0005737,0005813,0005615,0005938,0005815,0099738,0043228,0043229,0005575,0110165,0005814,0043226,0043232
TRINITY_DN2650_c1_g1_i10	hypothetical protein	0	0	13.598	0	0	11606.5	286.987	1.561	0	0	1190.86	211	1	0005575,0031224,0016021,0110165
TRINITY_DN2650_c1_g1_i2	actin, cytoplasmic 2	589.266	527.108	1132.31	950.34	696.369	711.524	194.403	282.79	1099.04	619.053	680.221	409	1	0005856,0099568,0015629,0005737,0005813,0005615,0005938,0005815,0099738,0043228,0043229,0005575,0110165,0005814,0043226,0043232
TRINITY_DN2650_c1_g1_i7	actin, aortic smooth muscle	0	0	0	0	4.258	4.286	4111.2	41.617	0	0	416.136	319	1	0005856,0099568,0015629,0005737,0005813,0005615,0005938,0005815,0099738,0043228,0043229,0005575,0110165,0005814,0043226,0043232
TRINITY_DN2650_c1_g1_i1	actin, cytoplasmic 1	0.144	5.005	4.585	12.087	0.215	8.582	1.53	1.854	5.278	1.498	4.0778	521	1	0048869,0006325,0051234,0043005,0006900,0030554,0003674,0097159,0040011,0017076,0043167,0043168,0097367,0043044,0110165,0051649,0019899,0030030,0140238,0000785,0010324,0061024,0099080,0009987,0007409,0048812,0032989,0005515,0099003,0000166,0120039,0036094,0005575,0099513,0099512,0006996,0008144,1901363,0048870,1901265,0005737,0051179,0030424,0048488,0032502,0042995,0019901,0098657,0005884,0006338…
TRINITY_DN2650_c1_g1_i3	actin, alpha skeletal muscle	0	0.241	0	0.258	0	13.498	1.867	0	0	0	1.5864	446	1	0032432,0005737,0097517,0099081,0099080,0110165,0001725,0005575,0003013,0099513,0099512,0043232,0005813,0005938,0060047,0005815,0005814,0032501,0042641,0099738,0008150,0099568,0005884,0003015,0003008,0043228,0043229,0043226
TRINITY_DN3759_c0_g3_i2	60S ribosomal protein L26-like	1703.09	3220.88	2614.66	2559.14	1603.9	4805.94	4181.7	3845.19	4178.72	11547.4	4026.06	470	1	0044271,0097159,0043603,0006807,0043043,0044249,0002181,0044267,0009987,0003723,0044260,0044085,1901564,1901566,0071704,1901363,0042273,0034641,0044237,0044238,0008150,0043170,1901576,0043604,0009059,0009058,0034645,0022613,0003674,0003676,0006518,0019538,0006414,0006412,0071840
TRINITY_DN1574_c0_g2_i4	C-type lectin	0.067	0.164	0.079	0.327	0.303	0.28	0.539	0.269	0	34104.9	3410.69	832	1	0030246,0003674
TRINITY_DN1574_c0_g2_i3	c-type lectin domain-containing protein 180	0	0	0	0.094	0	0	0.096	0	0	192.484	19.2674	1193	2	0030246,0003674
TRINITY_DN1574_c0_g2_i6	hypothetical protein	0	0.051	0	0	0	0	0	0	0	190.06	19.0111	1551	3	0030246,0003674
TRINITY_DN1574_c0_g2_i1	hypothetical protein	0	0	0	0	0	0	0	0	0.249	151.892	15.2141	1657	3	0030246,0003674
TRINITY_DN1574_c0_g2_i9	C-type lectin	0	0	0	0	0	0	0	0	0.834	118.438	11.9272	1296	2	0030246,0003674
TRINITY_DN680_c1_g1_i4	BnaA05g27530D protein	1177.58	2766.04	2061.24	3281.08	1365.01	4350.43	3891.93	3738.32	5743.17	7163.5	3553.83	689	1	0030490,0000462,0006364,0097159,0090304,0006807,0034470,0044391,0044249,0022627,1990904,0046483,0016070,0009987,0016072,0003723,0044260,0006139,0005575,0006396,0071704,1901363,1901360,0034641,0044237,0044238,0008150,0043170,0032991,1901576,0009059,0009058,0015935,0006725,0019843,0034645,0003735,0003674,0003676,0005198,0034660,0006414
TRINITY_DN680_c1_g1_i2	BnaA05g27530D protein	194.817	291.058	212.026	263.102	194.916	432.386	579.479	393.564	415.101	611.73	358.818	738	1	0030490,0016070,0003723,0000462,0006364,0030554,0097159,0090304,0008150,0017076,0043167,0043168,0097367,0006807,1901265,0034470,0008144,0044249,0016740,0022627,0032559,0046483,0032555,0009987,0016072,0005516,0140096,0032553,0006139,0044391,0000166,0004683,0005575,0005515,1901576,1901363,1901360,0003824,0034660,0034641,0044237,0044238,0006414,0043170,0032991,0071704,0044260,0009059,0009058,0015935…
TRINITY_DN680_c1_g1_i6	BnaA05g27530D protein	81.077	45.133	58.147	40.248	59.253	106.947	276.741	56.245	69.712	104.386	89.7889	804	1	0030490,0000462,0006364,0097159,0090304,0006807,0034470,0044391,0044249,0022627,1990904,0046483,0016070,0009987,0016072,0003723,0044260,0006139,0005575,0006396,0071704,1901363,1901360,0034641,0044237,0044238,0008150,0043170,0032991,1901576,0009059,0009058,0015935,0006725,0019843,0034645,0003735,0003674,0003676,0005198,0034660,0006414
TRINITY_DN680_c1_g1_i10	BnaA05g27530D protein	2.817	14.769	6.433	13.883	8.504	13.896	23.187	12.725	22.182	11.023	12.9419	1317	2	0030490,0000462,0006364,0097159,0090304,0006807,0034470,0044391,0044249,0022627,1990904,0046483,0016070,0009987,0016072,0003723,0044260,0006139,0005575,0006396,0071704,1901363,1901360,0034641,0044237,0044238,0008150,0043170,0032991,1901576,0009059,0009058,0015935,0006725,0019843,0034645,0003735,0003674,0003676,0005198,0034660,0006414
TRINITY_DN680_c1_g1_i1	TRINITY_DN680_c1_g1_i1	1.64	16.144	5.384	9.081	6.491	9.223	6.221	11.361	11.36	11.314	8.8219	1405	0
TRINITY_DN9322_c0_g1_i3	Ribosomal protein, large, P1	820.274	2251.18	2055.63	3666.69	1934.23	3225.28	4373.46	4057.36	6246.03	8343.9	3697.4	609	1	0048869,0044271,0043604,0008047,0030099,0043603,0043021,0006807,0005515,0043043,0044391,0019899,0044249,0002181,0019209,0016740,1990904,0022625,0044267,0009987,0019207,0140096,0044260,0044877,0005575,1901564,1901566,1901576,0098772,0006414,0003824,0032502,0030154,0034641,0044237,0044238,0008150,0043170,0032991,0071704,0030218,0009059,0009058,0015934,0034645,0016772,0016773,0019538,0030234,0003674…
TRINITY_DN6003_c1_g1_i3	40S ribosomal protein S25	1305.27	2831.82	2634.12	3454.07	1960.8	5159.36	4891.24	4040.86	4880.91	5979.36	3713.78	531	1	0015935,0032991,0005575,0022627,0044391,1990904
TRINITY_DN1550_c1_g1_i1	Apolipoprotein AI	0.034	5774.78	1555.43	7.466	0.051	0.237	0	0.089	0.716	24807.6	3214.64	1441	2	0006066,0051234,0008610,0015485,0098772,0097159,0043167,1902653,1902652,0043168,0006807,0005515,0042157,0008203,0008202,0044281,0006869,0005102,0008289,0110165,0048018,0008083,0005575,0005576,0005615,1901564,1901615,1901576,0032934,0046165,1901362,1901360,0030545,0006694,0030546,0051179,0006695,0043178,0044238,0005179,0008150,0043170,0071704,0009058,0006629,0044283,0071702,0016126,0016125,1901617…
TRINITY_DN1550_c1_g1_i3	Apolipoprotein AI	0	42.615	4.63	0	0	0	0	0	0	127.738	17.4983	1576	3	0006066,0051234,0008610,0015485,0098772,0097159,0043167,1902653,1902652,0043168,0006807,0005515,0042157,0008203,0008202,0044281,0006869,0005102,0008289,0110165,0048018,0008083,0005575,0005576,0005615,1901564,1901615,1901576,0032934,0046165,1901362,1901360,0030545,0006694,0030546,0051179,0006695,0043178,0044238,0005179,0008150,0043170,0071704,0009058,0006629,0044283,0071702,0016126,0016125,1901617…
TRINITY_DN1550_c1_g1_i2	TRINITY_DN1550_c1_g1_i2	0	22.712	3.243	0.335	0	0	0	0	0	71.26	9.755	390	0
TRINITY_DN3248_c0_g1_i1	40S ribosomal protein S15	1114.52	2581.68	2054.14	3578.11	1502.82	4921.87	4908.74	4299.46	4053.06	6090.36	3510.48	505	1	0044271,0043604,0043603,0006807,0043043,0044391,0044249,0022627,1990904,0044267,0009987,0044260,0005575,1901564,1901566,0071704,0009058,0044237,0044238,0008150,0043170,1901576,0009059,0034641,0015935,0032991,0034645,0003735,0003674,0006518,0005198,0019538,0006412
TRINITY_DN393_c0_g1_i2	Metallothionein	4308.41	825.545	8905.08	685.315	1719.4	499.954	247.929	232.184	536.281	16367.4	3432.75	409	1	0043169,0046872,0003674,0043167
TRINITY_DN393_c0_g1_i4	Metallothionein	0.3	2.209	26.411	1.444	8.257	0	1.407	0.302	0.306	74	11.4636	922	2	0043169,0046872,0003674,0043167
TRINITY_DN393_c0_g1_i1	Metallothionein	0	2.153	22.022	2.801	2.466	1.674	2.316	1.441	4.984	56.459	9.6316	797	2	0043169,0046872,0003674,0043167
TRINITY_DN393_c0_g1_i3	Metallothionein	0.525	1.298	6.718	1.602	2.51	0	0	0	2.751	30.812	4.6216	534	1	0043169,0046872,0003674,0043167
TRINITY_DN3842_c0_g1_i5	60S ribosomal protein L36	956.906	2445.97	2275.57	2848.44	1521.78	3791.55	4010.9	3718.23	4545.23	8150.44	3426.5	458	1	0005840,0003674,0043604,0043603,0006807,0110165,0043043,0044249,0002181,0044267,0009987,0044260,0043229,0005575,1901564,0043232,0071704,0009058,0044237,0044238,0008150,0043170,1901576,0009059,0034641,0034645,0003735,0044271,0043228,0006518,0043226,0005198,0019538,0006414,1901566,0006412
TRINITY_DN3842_c0_g1_i2	60S ribosomal protein L36	29.609	5.606	13.197	15.302	3.917	10.448	10.696	16.148	10.567	4.548	12.0038	544	1	0005840,0003674,0043604,0043603,0006807,0110165,0043043,0044249,0002181,0044267,0009987,0044260,0043229,0005575,1901564,0043232,0071704,0009058,0044237,0044238,0008150,0043170,1901576,0009059,0034641,0034645,0003735,0044271,0043228,0006518,0043226,0005198,0019538,0006414,1901566,0006412
TRINITY_DN7580_c2_g1_i10	60S ribosomal protein L32	1454.97	2516.46	2325.92	2676.93	1400.91	3799.52	4510.23	3562.29	3922.51	7686.41	3385.62	501	1	0005840,0006412,0044271,0043604,0043603,0006807,0110165,0043043,0044249,0044267,0009987,0044260,0043229,0005575,1901564,0043232,1901576,0009058,0044237,0044238,0008150,0043170,0071704,0009059,0034641,0034645,0003735,0003674,0043228,0006518,0005198,0019538,1901566,0043226
TRINITY_DN29388_c0_g1_i3	40S ribosomal protein S3a	1826.49	2539.89	1954.34	2718.25	1462.85	5129.99	4028.34	3542.71	4380.29	6600.18	3418.33	858	1	0005575,0005829,0110165
TRINITY_DN512_c1_g1_i7	Ubiquitin-40S ribosomal protein S27a	762.419	2372.26	2150.89	3143.3	1418.22	3506.91	3457.82	3240.46	4758.36	8266.36	3307.7	662	1	0009058,0043226,0044271,0043604,0044260,0043227,0043603,0051603,0006807,0043412,0043043,0044391,0019899,0044249,0044248,0022627,1990904,1901575,0044267,0009987,0003674,0003723,0005515,0006508,0043229,0016567,0005575,0005634,0043231,1901564,1901566,1901576,0070647,1901363,0005198,0032446,0043632,0044389,0044237,0044238,0110165,0008150,0043170,0071704,0097159,0009059,0034641,0015935,0032991,0031386…
TRINITY_DN512_c1_g1_i11	Ubiquitin-40S ribosomal protein S27a	511.793	35.13	35.873	49.309	18.363	79.479	26.427	65.415	68.367	18.504	90.866	636	1	0003674,0097159,0043227,0051603,0005515,0006807,0110165,0031625,0044391,0019899,0044248,0043412,0022627,1990904,0044267,0009987,0003723,0044260,0006508,0016567,0005575,0005634,0043231,1901564,0006464,0070647,1901363,0032446,0043632,0044389,0044237,0044238,0008150,0043170,0071704,1901575,0015935,0032991,0019538,0009057,0009056,0003676,0036211,0043229,0019941,0043226,0044265
TRINITY_DN2020_c0_g1_i55	60S ribosomal protein L35	1215.2	2484.69	2604.26	2564.68	1475.17	3680.83	3833.8	3665.27	3933.08	7811.54	3326.85	506	1	0000463,0006364,0097159,0090304,0006807,0034470,0046483,0003729,0016070,0009987,0016072,0003723,0006139,0000470,0006396,1901363,1901360,0044237,0044238,0008150,0043170,0071704,0034641,0006725,0003674,0003676,0034660
TRINITY_DN2020_c0_g1_i34	60S ribosomal protein L35	8.615	49.009	29.349	55.731	32.576	20.007	46.848	47.213	80.917	59.562	42.9827	943	2	0000463,0006364,0097159,0090304,0006807,0034470,0046483,0003729,0016070,0009987,0016072,0003723,0006139,0000470,0006396,1901363,1901360,0044237,0044238,0008150,0043170,0071704,0034641,0006725,0003674,0003676,0034660
TRINITY_DN840_c11_g1_i26	Myoglobin	0.141	0	0	0	0	33499.2	0	0	0	0	3349.94	1208	1	1901363,0048037,0003674,0020037,0097159,0019825,0005344,0046906,0043167,0043169,0036094,0046872,0008144
TRINITY_DN840_c11_g1_i14	myoglobin	0	0	0	0	0	210.038	0	0.257	0	0	21.0295	582	1	0015893,0051234,1901363,0048037,0015671,0051179,0003674,0020037,0097159,0019825,0046906,0036094,0015669,0008150,0008144
TRINITY_DN840_c11_g1_i1	myoglobin	0	0	0	0	0	147.393	0	0	0	0	14.7393	925	1
TRINITY_DN840_c11_g1_i12	myoglobin-like	0	0.914	0	2.98	0	55.568	0.851	0.922	0	0.769	6.2004	1209	1
TRINITY_DN840_c11_g1_i19	Myoglobin	0.125	0.721	0	1.042	0.224	47.63	0.062	0.64	0.147	0.735	5.1326	1629	2	0015893,0051234,1901363,0048037,0015671,0051179,0003674,0020037,0097159,0019825,0005344,0046906,0043167,0043169,0036094,0046872,0015669,0008150,0008144
TRINITY_DN840_c11_g1_i29	myoglobin	0.162	0	0	0	0.212	29.365	0	0	0.712	0	3.0451	1078	1
TRINITY_DN840_c11_g1_i31	Myoglobin	0	0	0.308	0	0	27.752	0	0	0	0	2.806	1636	2	0015893,0051234,1901363,0048037,0015671,0051179,0003674,0020037,0097159,0019825,0005344,0046906,0043167,0043169,0036094,0046872,0015669,0008150,0008144
TRINITY_DN660_c0_g1_i1	Ribosomal protein L35a	1437.22	2375.45	2125.8	2336.21	1460.51	3683.74	4688.85	3370.05	4189.8	6759.81	3242.74	478	1	0005840,0003674,0043604,0043603,0006807,0110165,0043043,0044249,0002181,0019538,0044267,0009987,0044260,0044085,0043229,0005575,1901564,0043232,0071704,0042273,0009058,0044237,0044238,0008150,0043170,1901576,0009059,0034641,0034645,0022613,0044271,0043228,0006518,0043226,0005198,0003735,0006414,1901566,0006412,0071840
TRINITY_DN660_c0_g1_i8	60S ribosomal protein L35a	1.226	15.376	12.12	19.996	23.535	24.723	20.651	33.21	39.121	34.633	22.4591	1193	1	0005840,0003674,0043604,0043603,0006807,0110165,0043043,0044249,0002181,0019538,0044267,0009987,0044260,0044085,0043229,0005575,1901564,0043232,0071704,0042273,0009058,0044237,0044238,0008150,0043170,1901576,0009059,0034641,0034645,0022613,0044271,0043228,0006518,0043226,0005198,0003735,0006414,1901566,0006412,0071840
TRINITY_DN660_c0_g1_i2	Ribosomal protein L35a	0.97	10.176	6.17	11.369	7.983	9.15	8.162	18.09	13.96	11.173	9.7203	1381	1	0005840,0003674,0043604,0043603,0006807,0110165,0043043,0044249,0002181,0019538,0044267,0009987,0044260,0044085,0043229,0005575,1901564,0043232,0071704,0042273,0009058,0044237,0044238,0008150,0043170,1901576,0009059,0034641,0034645,0022613,0044271,0043228,0006518,0043226,0005198,0003735,0006414,1901566,0006412,0071840
TRINITY_DN74_c0_g3_i11	40S ribosomal protein S12	1012.88	1516.25	1141.51	1858.34	953.816	2171.34	1626.38	2236.73	3710.36	3801.63	2002.92	594	1	0015935,0032991,0005575,0022627,0044391,1990904
TRINITY_DN74_c0_g3_i5	40S ribosomal protein S12	431.422	642.945	353.401	681.119	285.762	1150.04	1505.17	1271.08	1048.28	4456.89	1182.61	645	1	0044271,0043604,0043603,0006807,0043043,0044391,0044249,0022627,1990904,0044267,0009987,0044260,0005575,1901564,1901566,0071704,0009058,0044237,0044238,0008150,0043170,1901576,0009059,0034641,0015935,0032991,0034645,0003735,0003674,0006518,0005198,0019538,0006412
TRINITY_DN74_c0_g3_i4	40S ribosomal protein S12	2.433	55.211	47.516	79.908	51.041	70.393	70.548	117.432	97.959	58.181	65.0622	908	1	0044271,0043604,0043603,0006807,0043043,0044391,0044249,0022627,1990904,0044267,0009987,0044260,0005575,1901564,1901566,0071704,0009058,0044237,0044238,0008150,0043170,1901576,0009059,0034641,0015935,0032991,0034645,0003735,0003674,0006518,0005198,0019538,0006412
TRINITY_DN74_c0_g3_i8	40S ribosomal protein S12	22.311	6.802	12.169	11.141	16.218	7.979	10.433	11.304	40.711	3.08	14.2148	610	1	0015935,0032991,0005575,0022627,0044391,1990904
TRINITY_DN74_c0_g3_i7	40S ribosomal protein S12	2.211	2.988	1.336	6.176	3.113	6.398	8.693	4.59	23.566	1.774	6.0845	684	1	0031224,0044271,0043604,0043603,0006807,0044260,0043043,0044391,0044249,0022627,1990904,0044267,0009987,0110165,0005575,1901564,1901566,1901576,0009058,0044237,0044238,0016021,0008150,0043170,0071704,0009059,0034641,0015935,0032991,0034645,0003735,0003674,0006518,0005198,0019538,0006412
TRINITY_DN956_c0_g1_i2	60S ribosomal protein L21	1413.36	2796.14	1851.16	2336.87	1488.09	3507.58	3099.99	2622.34	4761.99	7387.88	3126.54	578	1	0044271,0043604,0043603,0006807,0043043,0044391,0044249,1990904,0022625,0044267,0009987,0044260,0005575,1901564,1901566,0071704,0009058,0044237,0044238,0008150,0043170,0032991,1901576,0009059,0034641,0015934,0034645,0003735,0003674,0006518,0005198,0019538,0006412
TRINITY_DN280_c0_g1_i6	slow myosin heavy chain 1	0	0	0	0	0	16203.1	61.055	2.979	0	0	1626.71	3228	1	0007010,0031032,0006996,0006807,0043412,0006796,0005737,0016740,0030036,0044267,0009987,0140096,0044260,0006468,0006793,0016310,0005575,1901564,0006464,0005856,0043228,0003824,0018193,0044237,0044238,0110165,0008150,0043170,0071704,0018210,0030029,0016772,0016773,0003674,0016043,0018107,0036211,0043229,0019538,0004674,0016301,0043232,0043226,0004672,0071840
TRINITY_DN280_c0_g1_i1	slow myosin heavy chain 1	0	0	0	0	0	3133.56	18.566	1.23	0	0	315.336	3297	2	0051493,0036211,0006468,0033043,0007010,0031032,0051128,0006996,0006807,0044260,0005737,0043412,0030036,0044267,0009987,0140096,0005515,0006796,0006793,0016310,0005575,1901564,0043232,0005856,0005815,0003824,0016740,0018193,0050794,0044237,0044238,0110165,0008150,0043170,0071704,0018210,0030029,0016772,0019538,0003674,0016043,0018107,0043228,0043229,0008092,0016773,0004674,0016301,0006464,0043226…
TRINITY_DN280_c0_g1_i15	slow myosin heavy chain 1	0	0	0	0.008	0	0.206	2962.02	61.807	0	0	302.404	2109	1	0007010,0031032,0006996,0006807,0043412,0006796,0005737,0016740,0030036,0044267,0009987,0140096,0044260,0006468,0006793,0016310,0005575,1901564,0006464,0005856,0043228,0003824,0018193,0044237,0044238,0110165,0008150,0043170,0071704,0018210,0030029,0016772,0016773,0003674,0016043,0018107,0036211,0043229,0019538,0004674,0016301,0043232,0043226,0004672,0071840
TRINITY_DN280_c0_g1_i3	slow myosin heavy chain 1	0	0	0	0.008	0.493	0	1981.4	50.644	0	0	203.255	2109	1	0007010,0031032,0006996,0006807,0043412,0006796,0005737,0016740,0030036,0044267,0009987,0140096,0044260,0006468,0006793,0016310,0005575,1901564,0006464,0005856,0043228,0003824,0018193,0044237,0044238,0110165,0008150,0043170,0071704,0018210,0030029,0016772,0016773,0003674,0016043,0018107,0036211,0043229,0019538,0004674,0016301,0043232,0043226,0004672,0071840
TRINITY_DN280_c0_g1_i10	slow myosin heavy chain 1	0	0	0	0.008	0	0	1749.57	2.19	0	0	175.177	2109	1	0007010,0031032,0006996,0006807,0043412,0006796,0005737,0016740,0030036,0044267,0009987,0140096,0044260,0006468,0006793,0016310,0005575,1901564,0006464,0005856,0043228,0003824,0018193,0044237,0044238,0110165,0008150,0043170,0071704,0018210,0030029,0016772,0016773,0003674,0016043,0018107,0036211,0043229,0019538,0004674,0016301,0043232,0043226,0004672,0071840
TRINITY_DN280_c0_g1_i4	slow myosin heavy chain 1	0	0	0	0.008	2.531	0	1168.14	0	0	0	117.068	2109	1	0007010,0031032,0006996,0006807,0043412,0006796,0005737,0016740,0030036,0044267,0009987,0140096,0044260,0006468,0006793,0016310,0005575,1901564,0006464,0005856,0043228,0003824,0018193,0044237,0044238,0110165,0008150,0043170,0071704,0018210,0030029,0016772,0016773,0003674,0016043,0018107,0036211,0043229,0019538,0004674,0016301,0043232,0043226,0004672,0071840
TRINITY_DN280_c0_g1_i12	slow myosin heavy chain 1	0.285	0	0	0	0.26	916.049	0	0	0.112	0	91.6706	3228	1	0007010,0031032,0006996,0006807,0043412,0006796,0005737,0016740,0030036,0044267,0009987,0140096,0044260,0006468,0006793,0016310,0005575,1901564,0006464,0005856,0043228,0003824,0018193,0044237,0044238,0110165,0008150,0043170,0071704,0018210,0030029,0016772,0016773,0003674,0016043,0018107,0036211,0043229,0019538,0004674,0016301,0043232,0043226,0004672,0071840
TRINITY_DN280_c0_g1_i14	slow myosin heavy chain 1	0	0	0	0	0	680.925	3.648	0	0	0	68.4573	3433	1	0007010,0031032,0006996,0006807,0043412,0006796,0005737,0016740,0030036,0044267,0009987,0140096,0044260,0006468,0006793,0016310,0005575,1901564,0006464,0005856,0043228,0003824,0018193,0044237,0044238,0110165,0008150,0043170,0071704,0018210,0030029,0016772,0016773,0003674,0016043,0018107,0036211,0043229,0019538,0004674,0016301,0043232,0043226,0004672,0071840
TRINITY_DN280_c0_g1_i7	slow myosin heavy chain 1	0.238	0	0.032	0	0.532	141.973	28.562	0	1.836	0	17.3173	3228	1	0007010,0031032,0006996,0006807,0043412,0006796,0005737,0016740,0030036,0044267,0009987,0140096,0044260,0006468,0006793,0016310,0005575,1901564,0006464,0005856,0043228,0003824,0018193,0044237,0044238,0110165,0008150,0043170,0071704,0018210,0030029,0016772,0016773,0003674,0016043,0018107,0036211,0043229,0019538,0004674,0016301,0043232,0043226,0004672,0071840
TRINITY_DN280_c0_g1_i9	slow myosin heavy chain 1	0	0	0	0	0	147.787	0	0.127	0	0	14.7914	3502	2	0051493,0036211,0006468,0033043,0007010,0031032,0051128,0006996,0006807,0044260,0005737,0043412,0030036,0044267,0009987,0140096,0005515,0006796,0006793,0016310,0005575,1901564,0043232,0005856,0005815,0003824,0016740,0018193,0050794,0044237,0044238,0110165,0008150,0043170,0071704,0018210,0030029,0016772,0019538,0003674,0016043,0018107,0043228,0043229,0008092,0016773,0004674,0016301,0006464,0043226…
TRINITY_DN280_c0_g1_i8	slow myosin heavy chain 1	0	0	0	0	0	36.532	0	0	0	0	3.6532	3433	1	0007010,0031032,0006996,0006807,0043412,0006796,0005737,0016740,0030036,0044267,0009987,0140096,0044260,0006468,0006793,0016310,0005575,1901564,0006464,0005856,0043228,0003824,0018193,0044237,0044238,0110165,0008150,0043170,0071704,0018210,0030029,0016772,0016773,0003674,0016043,0018107,0036211,0043229,0019538,0004674,0016301,0043232,0043226,0004672,0071840
TRINITY_DN280_c0_g1_i2	slow myosin heavy chain 1	0	0	0	0	0	21.194	0	0.587	0	0	2.1781	3297	2	0051493,0036211,0006468,0033043,0007010,0031032,0051128,0006996,0006807,0044260,0005737,0043412,0030036,0044267,0009987,0140096,0005515,0006796,0006793,0016310,0005575,1901564,0043232,0005856,0005815,0003824,0016740,0018193,0050794,0044237,0044238,0110165,0008150,0043170,0071704,0018210,0030029,0016772,0019538,0003674,0016043,0018107,0043228,0043229,0008092,0016773,0004674,0016301,0006464,0043226…
TRINITY_DN5054_c0_g2_i3	40S ribosomal protein S19	1535.21	1976.16	1706.66	2063.47	1281.42	3252.42	3881.37	3621.4	3326.24	7525.12	3016.95	491	1	0044271,0097159,0043603,0006807,0043043,0044391,0044249,0022627,1990904,0044267,0009987,0003723,0044260,0005575,1901564,1901566,1901576,1901363,0009058,0044237,0044238,0008150,0043170,0071704,0043604,0009059,0034641,0015935,0032991,0034645,0003735,0003674,0003676,0006518,0005198,0019538,0006412
TRINITY_DN2463_c0_g1_i4	Beta 1-globin	3.571	18.42	850.344	1117.6	77.51	1542.15	111.314	46.853	17281.7	65.401	2111.49	628	1	1901363,0048037,0005833,0043177,0003674,0020037,0097159,0019825,0005344,0046906,0043167,0005575,0043169,0036094,0046872,0008144,0032991
TRINITY_DN2463_c0_g1_i5	Beta 1-globin	2.527	7.169	646.473	776.892	55.095	923.648	73.576	20.948	9639.4	51.056	1219.68	621	1	1901363,0048037,0005833,0043177,0003674,0020037,0097159,0019825,0005344,0046906,0043167,0005575,0043169,0036094,0046872,0008144,0032991
TRINITY_DN2463_c0_g1_i1	Beta 1-globin	0.237	0.985	56.174	87.263	10.495	86.511	8.605	4.066	1177.31	4.794	143.644	1287	1	1901363,0048037,0005833,0043177,0003674,0020037,0097159,0019825,0005344,0046906,0043167,0005575,0043169,0036094,0046872,0008144,0032991
TRINITY_DN2463_c0_g1_i9	Beta 1-globin	0	0	0	19.151	0	57.35	0	0	141.961	0	21.8462	648	2	1901363,0048037,0005833,0043177,0003674,0020037,0097159,0019825,0005344,0046906,0043167,0005575,0043169,0036094,0046872,0008144,0032991
TRINITY_DN2463_c0_g1_i7	Beta 1-globin	0.332	0.401	14.125	0	3.171	0	2.479	0.659	90.672	1.1	11.2939	655	2	1901363,0048037,0005833,0043177,0003674,0020037,0097159,0019825,0005344,0046906,0043167,0005575,0043169,0036094,0046872,0008144,0032991
TRINITY_DN2463_c0_g1_i2	Beta 1-globin	0	0	2.404	5.945	2.483	25.107	0	0.668	66.956	0	10.3563	412	1	1901363,0048037,0005833,0043177,0003674,0020037,0097159,0019825,0005344,0046906,0043167,0005575,0043169,0036094,0046872,0008144,0032991
TRINITY_DN2463_c0_g1_i6	Beta 1-globin	0.245	0	4.042	2.642	0	3.932	0.851	0	30.129	0	4.1841	589	2	1901363,0048037,0005833,0043177,0003674,0020037,0097159,0019825,0005344,0046906,0043167,0005575,0043169,0036094,0046872,0008144,0032991
TRINITY_DN2463_c0_g1_i3	Beta 1-globin	0	0	1.14	4.636	0.169	5.239	0	0	17.519	0	2.8703	612	2	1901363,0048037,0005833,0043177,0003674,0020037,0097159,0019825,0005344,0046906,0043167,0005575,0043169,0036094,0046872,0008144,0032991
TRINITY_DN10276_c0_g1_i8	40S ribosomal protein S24	894.498	2043.83	1915.05	2631.4	970.678	1143.85	2897.59	3072.53	3505.91	6551.18	2562.65	638	1	0005840,0009892,0009890,0010468,0003723,0019222,0003674,0043604,0044238,1901576,0043603,0051171,0006807,0044260,0043043,0003743,0044249,0009987,0006446,0080090,0060255,0008190,0044267,0031327,0031324,2000113,0031323,0005515,0010556,0043229,0034248,0017148,2000112,0010558,1901564,0043232,0048523,1901363,0051246,0045947,0051172,0051248,0009889,0110165,0032268,0010629,0010605,0050794,0044237,0010608…
TRINITY_DN10276_c0_g1_i7	40S ribosomal protein S24	26.062	12.885	36.238	7.955	462.722	2815.16	559.25	21.604	18.543	19.07	397.949	548	1	0005840,0006412,0044271,0043604,0043603,0006807,0110165,0043043,0044249,0044267,0009987,0044260,0043229,0005575,1901564,0043232,1901576,0009058,0044237,0044238,0008150,0043170,0071704,0009059,0034641,0034645,0003735,0003674,0043228,0006518,0005198,0019538,1901566,0043226
TRINITY_DN10276_c0_g1_i1	40S ribosomal protein S24	0.298	7.651	9.429	5.804	28.998	18.188	8.235	7.261	7.584	6.271	9.9719	2329	1	0005840,0009892,0009890,0010468,0003723,0019222,0003674,0043604,0044238,1901576,0043603,0051171,0006807,0044260,0043043,0003743,0044249,0009987,0006446,0080090,0060255,0008190,0044267,0031327,0031324,2000113,0031323,0005515,0010556,0043229,0034248,0017148,2000112,0010558,1901564,0043232,0048523,1901363,0051246,0045947,0051172,0051248,0009889,0110165,0032268,0010629,0010605,0050794,0044237,0010608…
TRINITY_DN4120_c3_g1_i3	Ribosomal S17 N domain-containing protein	1907.79	2263.84	1981.93	2356.05	1083.58	2354.25	2895.24	3238.92	3498.91	7850.42	2943.09	582	1	0015935,0032991,0005575,0022627,0044391,1990904
TRINITY_DN4120_c3_g1_i9	40S ribosomal protein S11	17.088	13.9	8.882	9.929	6.406	5.974	37.281	11.894	47.62	21.529	18.0503	627	1	0044271,0043604,0043603,0006807,0043043,0044391,0044249,0022627,1990904,0044267,0009987,0044260,0005575,1901564,1901566,0071704,0009058,0044237,0044238,0008150,0043170,1901576,0009059,0034641,0015935,0032991,0034645,0003735,0003674,0006518,0005198,0019538,0006412
TRINITY_DN4120_c3_g1_i4	TRINITY_DN4120_c3_g1_i4	0.181	7.832	2.972	6.028	2.44	3.426	4.173	12.348	10.466	5.478	5.5344	442	0
TRINITY_DN10596_c0_g1_i8	60S ribosomal protein L12	1925.92	2665.01	1646.8	2450.42	1310.84	3498.99	3167.74	2787.26	3764.3	5416.43	2863.37	647	1	0005840,0097159,0000027,0043933,0044260,0044249,0005737,1990904,0022607,0003723,0110165,0003676,0005575,0043232,1901576,1901363,0034622,0009059,0044237,0065003,0008150,0043170,0071704,0022618,0009058,0032991,0019843,0034645,0003735,0071826,0003674,0016043,0043228,0043229,0005198,0006414,0043226,0009987,0071840
TRINITY_DN10596_c0_g1_i1	60S ribosomal protein L12	106.673	82.686	27.876	88.585	37.647	73.121	198.371	52.272	224.037	107.651	99.8919	705	1	0005840,0097159,0000027,0043933,0044260,0044249,0005737,1990904,0022607,0003723,0110165,0003676,0005575,0043232,0071704,1901363,0009059,0044237,0065003,0008150,0043170,1901576,0022618,0009058,0032991,0019843,0034645,0071826,0003674,0016043,0043228,0043229,0034622,0006414,0043226,0009987,0071840
TRINITY_DN10596_c0_g1_i13	60S ribosomal protein L12	6.367	16.512	7.128	9.081	5.362	10.609	34.074	9.513	43.084	7.648	14.9378	762	1	0005840,0097159,0000027,0043933,0044260,0044249,0005737,1990904,0022607,0003723,0110165,0003676,0005575,0043232,0071704,1901363,0009059,0044237,0065003,0008150,0043170,1901576,0022618,0009058,0032991,0019843,0034645,0071826,0003674,0016043,0043228,0043229,0034622,0006414,0043226,0009987,0071840
TRINITY_DN1069_c10_g3_i1	Ribosomal protein S15a	1526.13	2190.59	2147.76	2164.98	1338.85	2788.36	2855.72	2661.71	3669.85	7634.44	2897.84	521	1	0048869,0043009,0003674,0043604,0030099,0043603,0006807,0044260,0030154,0043043,0044391,0044249,0022627,1990904,0044267,0009987,0110165,0007275,0051726,0005575,1901564,1901566,1901576,0009792,0007420,0048856,0032502,0032501,0009058,0050794,0031224,0044238,0016021,0008150,0043170,0071704,0030218,0009059,0034641,0015935,0032991,0044237,0034645,0003735,0044271,0006518,0005198,0019538,0048513,0006412
TRINITY_DN11205_c0_g1_i28	60S ribosomal protein L19	64.076	1926.05	1002.81	2056.43	863.885	3051.29	2943.18	2940.93	2772.22	5254.31	2287.52	743	1	0044271,0097159,0043603,0006807,0043043,0044391,0044249,1990904,0022625,0044267,0009987,0003723,0044260,0005575,1901564,1901566,0071704,1901363,0009058,0044237,0044238,0008150,0043170,0032991,1901576,0043604,0009059,0034641,0015934,0034645,0003735,0003674,0003676,0006518,0005198,0019538,0006412
TRINITY_DN11205_c0_g1_i41	60S ribosomal protein L19	946.302	406.073	555.786	436.379	367.727	729.211	708.628	558.083	590.589	720.668	601.945	876	1	0097159,0003723,1901363,0003674,0003676
TRINITY_DN1904_c0_g1_i4	40S ribosomal protein S13	1120.09	2212.44	1611.53	2624.9	1073.38	3300.48	2931.1	3109.55	3839.86	7045.94	2886.93	559	1	0022627,0015935,0032991,0005730,0003723,0003674,0019843,0110165,0097159,0043228,0043229,0005575,1901363,0003676,0043226,0043232,0044391,1990904
TRINITY_DN4013_c0_g1_i1	40S ribosomal protein S20	1260.4	2526.82	1798.26	2552.89	1323.34	2831.94	2801.32	3433.39	3707.08	6644.61	2888	575	1	0015935,0032991,0005575,0022627,0044391,1990904
TRINITY_DN4013_c0_g1_i3	40S ribosomal protein S20	28.756	7.923	4.289	8.903	6.5	2.964	6.033	14.06	5.68	10.846	9.5954	1140	2	0044271,0043604,0043603,0006807,0043043,0044391,0044249,0022627,1990904,0044267,0009987,0044260,0005575,1901564,1901566,0071704,0009058,0044237,0044238,0008150,0043170,1901576,0009059,0034641,0015935,0032991,0034645,0003735,0003674,0006518,0005198,0019538,0006412
TRINITY_DN4040_c0_g1_i2	Ribosomal protein L37a	1043.86	2055.2	2190.36	2216.92	1241.65	2631.97	3023.84	2654.82	3540.23	7785.01	2838.39	533	1
TRINITY_DN4040_c0_g1_i4	60S ribosomal protein L37a	0.211	4.622	4.14	3.394	3.52	3.001	2.3	3.055	4.129	6.474	3.4846	1250	2	0005840,0006412,0044271,0043604,0043603,0006807,0044260,0043043,0044249,0044267,0009987,0110165,0006518,0005575,1901564,0043232,1901576,0009058,0044237,0044238,0008150,0043170,0071704,0009059,0034641,0034645,0003735,0003674,0043228,0043229,0005198,0019538,1901566,0043226
TRINITY_DN2275_c3_g1_i2	40S ribosomal protein S28	739.407	2358.88	1760.21	2419.11	1204.05	2546.61	3249.51	3116.38	4411.62	6221.55	2802.73	349	1	0030490,0005840,0015935,0031224,0006364,0003674,0043604,0090304,0043603,0000028,0006807,0044260,0043043,0044391,0044249,0002181,0098562,0022627,1990904,0046483,0044267,0016070,0009987,0016072,0110165,0006139,0042788,0043229,0098554,0005575,1901564,0006396,0016787,0071704,0034470,0005198,1901360,0022618,0003824,0034641,0044237,0044238,0043933,0016021,0008150,0043170,0032991,1901576,0009059,0009058…
TRINITY_DN1230_c0_g2_i1	ubiquitin-60S ribosomal protein L40	1121.71	2391.35	1545.29	2263.75	1146.18	2773.08	3359.44	3044.58	3999.88	6057.4	2770.27	499	1	0005840,0006412,0009058,0043043,0009056,0043604,0043603,0051603,0005515,0006807,0043412,0031625,0019899,0044249,0005737,0043232,0044267,0009987,0003674,0036211,0044260,0006508,0006518,0016567,0005575,0005634,0043231,1901564,1901566,1901576,0070647,0044248,0032446,0043632,0044389,0044237,0044238,0110165,0008150,0043170,0034641,0071704,0009059,1901575,0034645,0003735,0009057,0044271,0043227,0043228…
TRINITY_DN3196_c0_g1_i4	60S ribosomal protein L14	940.21	2106.14	1868.94	2299.82	1279.1	3326.44	3041.06	3099.5	3529.54	6200.36	2769.11	547	1	1901363,0042273,0009987,0003723,0003674,0003676,0097159,0044085,0022613,0008150,0071840
TRINITY_DN5208_c0_g1_i6	60S ribosomal protein L17	811.584	2435.25	1298.35	2598.97	1396.56	3163.53	3932.65	3533.7	3326.21	4798.65	2729.55	812	1	0043604,0043603,0006807,0043043,0044249,0002181,0044267,0009987,0044260,1901564,1901566,0071704,0009058,0044237,0044238,0008150,0043170,1901576,0009059,0034641,0034645,0019538,0044271,0006518,0006414,0006412
TRINITY_DN5208_c0_g1_i5	60S ribosomal protein L17	18.844	6.004	3.852	6.827	3.659	8.307	4.423	10.161	5.474	8.348	7.5899	1249	1	0043604,0043603,0006807,0043043,0044249,0002181,0044267,0009987,0044260,1901564,1901566,0071704,0009058,0044237,0044238,0008150,0043170,1901576,0009059,0034641,0034645,0019538,0044271,0006518,0006414,0006412
TRINITY_DN925_c0_g1_i7	elongation factor 1-alpha 1	369.141	1192.57	707.214	1940.33	602.12	923.363	329.27	985.282	1592.67	2058.35	1070.03	1231	1	0016818,0032550,0016817,0097159,0043167,0043168,0019001,0097367,0110165,0000166,0044249,0005737,0003746,0032555,0009987,0003723,0001882,0044260,0016462,0005575,0016787,1901576,1901363,1901265,0001883,0090079,0003824,0003924,0044237,0032553,0008150,0043170,0071704,0009059,0009058,0017111,0005525,0032549,0034645,0032561,0008135,0045182,0003674,0003676,0035639,0017076,0036094,0006414
TRINITY_DN925_c0_g1_i3	elongation factor 1-alpha 1	749.847	1143.65	546.686	730.879	129.122	791.1	34.354	151.795	709.439	2976.11	796.297	1894	1	0016818,0032550,0016817,0097159,0043167,0043168,0019001,0097367,0110165,0000166,0044249,0005737,0003746,0032555,0009987,0003723,0001882,0044260,0016462,0005575,0016787,1901576,1901363,1901265,0001883,0090079,0003824,0003924,0044237,0032553,0008150,0043170,0071704,0009059,0009058,0017111,0005525,0032549,0034645,0032561,0008135,0045182,0003674,0003676,0035639,0017076,0036094,0006414
TRINITY_DN925_c0_g1_i6	elongation factor 1-alpha 1	0.397	3.141	318.712	3.553	257.641	1278.83	3959.7	166.791	17.741	3.433	600.994	1829	1	0016787,1901576,0009059,0016818,0017111,0034645,0009987,0009058,0016817,0003674,0044260,0003824,0016462,0044249,0071704,0044237,0006414,0008150,0043170,0003924
TRINITY_DN925_c0_g1_i15	elongation factor 1-alpha 1	0.044	0	0.051	0	271.603	0.86	173.621	838.657	0	0	128.484	1591	1	0016818,0032550,0016817,0097159,0043167,0043168,0019001,0097367,0110165,0000166,0044249,0005737,0003746,0032555,0009987,0003723,0001882,0044260,0016462,0005575,0016787,1901576,1901363,1901265,0001883,0090079,0003824,0003924,0044237,0032553,0008150,0043170,0071704,0009059,0009058,0017111,0005525,0032549,0034645,0032561,0008135,0045182,0003674,0003676,0035639,0017076,0036094,0006414
TRINITY_DN925_c0_g1_i13	elongation factor 1-alpha 1	0	0	0	0	0	0	231.966	538.926	0	0	77.0892	1162	1	0016818,0032550,0016817,0097159,0043167,0043168,0019001,0097367,0110165,0000166,0044249,0005737,0003746,0032555,0009987,0003723,0001882,0044260,0016462,0005575,0016787,1901576,1901363,1901265,0001883,0090079,0003824,0003924,0044237,0032553,0008150,0043170,0071704,0009059,0009058,0017111,0005525,0032549,0034645,0032561,0008135,0045182,0003674,0003676,0035639,0017076,0036094,0006414
TRINITY_DN925_c0_g1_i1	elongation factor 1-alpha 1	0	0	0	0	3.787	0	2.775	29.368	0	0	3.593	1739	2	0016818,0032550,0016817,0097159,0043167,0043168,0019001,0097367,0110165,0000166,0044249,0005737,0003746,0032555,0009987,0003723,0001882,0044260,0016462,0005575,0016787,1901576,1901363,1901265,0001883,0090079,0003824,0003924,0044237,0032553,0008150,0043170,0071704,0009059,0009058,0017111,0005525,0032549,0034645,0032561,0008135,0045182,0003674,0003676,0035639,0017076,0036094,0006414
TRINITY_DN925_c0_g1_i16	elongation factor 1-alpha 1	0	0	0	0	3.051	0.998	15.565	0	0	0	1.9614	1591	1	0016787,1901576,0009059,0016818,0017111,0034645,0009987,0009058,0016817,0003674,0044260,0003824,0016462,0044249,0071704,0044237,0006414,0008150,0043170,0003924
TRINITY_DN925_c0_g1_i5	elongation factor 1-alpha 1	0	0	0	0	0.429	0	0.183	2.006	0	0	0.2618	851	1	0016787,1901576,0009059,0016818,0017111,0034645,0009987,0009058,0016817,0003674,0044260,0003824,0016462,0044249,0071704,0044237,0006414,0008150,0043170,0003924
TRINITY_DN132_c0_g1_i4	myosin light chain 1/3, skeletal muscle suspicious taxon	0	0	1.111	0.349	3.598	0.323	11833.2	54.172	1.5	2.422	1189.67	382	1	0043169,0046872,0005509,0003674,0043167
TRINITY_DN132_c0_g1_i2	Myosin, light polypeptide 3, skeletal muscle	0.139	0	0.742	0.2	1.662	0	10833.7	51.22	0	0	1088.76	514	1
TRINITY_DN132_c0_g1_i3	Myosin, light polypeptide 3, skeletal muscle	0	0	0.091	0	0	0	104.254	0.553	0.154	0	10.5052	1012	1	0043169,0046872,0005509,0003674,0043167
TRINITY_DN6014_c0_g1_i3	40S ribosomal protein S23	1055.97	1980.52	1828.92	2083.23	1079.7	2959.92	2883.04	2793.74	3134.63	6318.14	2611.78	588	1	1901576,0071704,0009059,0009058,0015935,1990904,0034645,0003735,0009987,0003674,0044260,0044249,0006414,0043170,0005198,0044237,0022627,0005575,0008150,0044391,0032991
TRINITY_DN154_c0_g1_i16	actin alpha 1, skeletal muscle A	1195.88	1646.56	147.058	1782.17	329.117	777.208	1589.04	6617.33	4134.35	119.28	1833.8	1597	1	0005856,0099568,0015629,0099738,0005737,0005813,0005938,0005815,0005814,0043228,0043229,0005575,0110165,0043226,0043232
TRINITY_DN154_c0_g1_i5	actin, cytoplasmic 1	352.491	276.779	434.789	512.427	445.915	323.016	152.681	201.481	522.443	213.611	343.563	1655	1	0048869,0006325,0051234,0043005,0048812,0006900,0040011,0006996,0043044,0110165,0051649,0019899,0005737,0140238,0000785,0010324,0061024,0099080,0009987,0042995,0032989,0005515,0099003,0016050,0048870,0005575,0016192,0099512,0048858,0120039,0007409,0051179,0030424,0048488,0032502,0019901,0098657,0032990,0006338,0008150,0009653,0000790,0005884,0006897,0099513,0003674,0016043,0099081,0030030,0019900…
TRINITY_DN154_c0_g1_i22	actin	2.544	0.507	0.105	0.246	1.026	2410.23	568.147	4.05	0	0	298.686	1336	1	0009893,0030554,0097159,0043167,0019222,0043168,0032553,0008144,0005737,0015629,0032559,0032555,1901265,0042995,0000166,0005575,0097367,0043232,0005856,1901363,0005813,0048856,0036302,0005938,0005815,0005814,0032502,0010628,0010604,0032501,0120025,0110165,0099738,0008150,0060255,0099568,0044297,0005524,0030027,0003272,0003674,0090130,0090131,0035639,0043228,0043229,0043226,0030175,0017076,0036094…
TRINITY_DN154_c0_g1_i3	actin, alpha cardiac muscle 1	0.284	0	0.599	0.146	0	1314.39	20.039	0.66	0.316	0	133.644	735	1	0009893,0030554,0097159,0043167,0019222,0043168,0032553,0008144,0005737,0015629,0032559,0032555,1901265,0042995,0000166,0005575,0097367,0043232,0005856,1901363,0005813,0048856,0036302,0005938,0005815,0005814,0032502,0010628,0010604,0032501,0120025,0110165,0099738,0008150,0060255,0099568,0044297,0005524,0030027,0003272,0003674,0090130,0090131,0035639,0043228,0043229,0043226,0030175,0017076,0036094…
TRINITY_DN154_c0_g1_i10	actin, aortic smooth muscle	0	0	0	143.816	0	89.873	426.211	2.598	0	0	66.2498	742	1	0005856,0099568,0015629,0005737,0005813,0005615,0005938,0005815,0099738,0043228,0043229,0005575,0110165,0005814,0043226,0043232
TRINITY_DN154_c0_g1_i24	actin, aortic smooth muscle	11.108	48.244	4.304	63.497	3.945	15.474	26.392	17.067	38.107	2.67	23.0808	742	1	0005856,0099568,0015629,0005737,0005813,0005615,0005938,0005815,0099738,0043228,0043229,0005575,0110165,0005814,0043226,0043232
TRINITY_DN154_c0_g1_i25	actin, cytoplasmic 1	22.248	5.665	26.167	24.25	68.621	20.05	0	3.902	39.701	1.699	21.2303	845	1	0048869,0006325,0051234,0043005,0048812,0006900,0040011,0006996,0043044,0110165,0051649,0019899,0005737,0140238,0000785,0010324,0061024,0099080,0009987,0042995,0032989,0005515,0099003,0016050,0048870,0005575,0016192,0099512,0048858,0120039,0007409,0051179,0030424,0048488,0032502,0019901,0098657,0032990,0006338,0008150,0009653,0000790,0005884,0006897,0099513,0003674,0016043,0099081,0030030,0019900…
TRINITY_DN154_c0_g1_i4	actin, cytoplasmic 1	47.862	0	47.081	0	0	0	28.698	14.992	0	0	13.8633	658	1	0048869,0006325,0051234,0043005,0048812,0006900,0040011,0006996,0043044,0110165,0051649,0019899,0005737,0140238,0000785,0010324,0061024,0099080,0009987,0042995,0032989,0005515,0099003,0016050,0048870,0005575,0016192,0099512,0048858,0120039,0007409,0051179,0030424,0048488,0032502,0019901,0098657,0032990,0006338,0008150,0009653,0000790,0005884,0006897,0099513,0003674,0016043,0099081,0030030,0019900…
TRINITY_DN154_c0_g1_i19	actin, gamma-enteric smooth muscle	11.039	44.269	4.787	15.687	0.927	1.304	11.766	13.054	17.085	2.74	12.2658	878	1	0030554,0097159,0043167,0097367,0043168,0110165,0008144,0005737,0015629,0032559,0032555,0032553,0000166,0005575,0043232,0005856,1901363,1901265,0005813,0005938,0005815,0005814,0099738,0099568,0005524,0003674,0035639,0043228,0043229,0017076,0036094,0043226
TRINITY_DN154_c0_g1_i28	actin, cytoplasmic 1	0.698	3.834	6.36	7.184	3.595	16.003	6.452	2.07	4.204	4.777	5.5177	1457	1	0048869,0006325,0051234,0043005,0048812,0006900,0040011,0006996,0043044,0110165,0051649,0019899,0005737,0140238,0000785,0010324,0061024,0099080,0009987,0042995,0032989,0005515,0099003,0016050,0048870,0005575,0016192,0099512,0048858,0120039,0007409,0051179,0030424,0048488,0032502,0019901,0098657,0032990,0006338,0008150,0009653,0000790,0005884,0006897,0099513,0003674,0016043,0099081,0030030,0019900…
TRINITY_DN154_c0_g1_i20	actin, gamma-enteric smooth muscle	0.238	0	0	0	0.122	25.212	2.474	0	0	0	2.8046	809	1	0005856,0099568,0015629,0099738,0005737,0005813,0005938,0005815,0005814,0043228,0043229,0005575,0110165,0043226,0043232
TRINITY_DN154_c0_g1_i26	actin, gamma-enteric smooth muscle	0	0	4.028	0.739	0	14.289	0	0	0	0	1.9056	804	1	0005856,0099568,0015629,0099738,0005737,0005813,0005938,0005815,0005814,0043228,0043229,0005575,0110165,0043226,0043232
TRINITY_DN154_c0_g1_i21	actin, gamma-enteric smooth muscle	0	0	0	0	0	0	4.368	0.206	0	0	0.4574	809	1	0005856,0099568,0015629,0099738,0005737,0005813,0005938,0005815,0005814,0043228,0043229,0005575,0110165,0043226,0043232
TRINITY_DN6991_c0_g1_i5	Ribosomal protein L31	895.927	1803.78	1717.41	1498.75	1228.67	2671.27	2711.84	2176.14	3411.65	6553.47	2466.89	619	1	0005840,0003674,0043604,0043603,0006807,0110165,0043043,0044249,0002181,0044267,0009987,0044260,0043229,0005575,1901564,0043232,0071704,0009058,0044237,0044238,0008150,0043170,1901576,0009059,0034641,0034645,0003735,0044271,0043228,0006518,0043226,0005198,0019538,0006414,1901566,0006412
TRINITY_DN6991_c0_g1_i8	60S ribosomal protein L31	16.892	3.104	1.045	3.118	0.6	1.917	1.473	1.447	1.551	4.67	3.5817	844	1	0005840,0003674,0043604,0043603,0006807,0110165,0043043,0044249,0002181,0044267,0009987,0044260,0043229,0005575,1901564,0043232,0071704,0009058,0044237,0044238,0008150,0043170,1901576,0009059,0034641,0034645,0003735,0044271,0043228,0006518,0043226,0005198,0019538,0006414,1901566,0006412
TRINITY_DN2559_c2_g1_i2	thymosin beta	2247.57	1781.34	2534.27	4522.59	855.886	743.914	1142.77	3294.68	9324.1	618.908	2706.6	581	1	0051270,0040011,0040012,0110165,0005737,0016477,0009987,0097435,0005515,0003785,0048870,0005575,0032879,0030334,2000145,0050794,0003779,0008150,0007015,0003674,0016043,0008092,0071840
TRINITY_DN2559_c2_g1_i3	thymosin beta	0.422	11.357	6.581	14.351	6.099	6.848	4.707	11.096	39.994	0.993	10.2448	1365	1	0051270,0040011,0040012,0110165,0005737,0016477,0009987,0097435,0005515,0003785,0048870,0005575,0032879,0030334,2000145,0050794,0003779,0008150,0007015,0003674,0016043,0008092,0071840
TRINITY_DN1298_c0_g1_i1	40S ribosomal protein S2	627.782	2105.42	874.172	2479.46	748.527	2855.71	4085.52	3385.39	2347.65	4298.45	2380.81	1043	1	0097159,0043167,0043169,0044391,0044249,0022627,1990904,0009987,0003723,0044260,0005575,1901576,1901363,0006414,0044237,0008150,0043170,0071704,0009059,0009058,0015935,0032991,0034645,0003735,0008270,0003674,0003676,0005198,0046872,0046914
TRINITY_DN310_c1_g1_i3	60S ribosomal protein L10a	1336.5	2191.2	1591.94	1995.63	902.822	2250.22	2641.25	2554.89	2541.59	5309.29	2331.53	734	1	0006364,0097159,0090304,0006807,0034470,0046483,0016070,0009987,0016072,0003723,0006139,0000470,0006396,1901363,1901360,0044237,0044238,0008150,0043170,0071704,0034641,0006725,0003674,0003676,0034660
TRINITY_DN310_c1_g1_i12	Putative Fanconi anemia group E protein	5.016	32.264	20.166	24.744	14.183	32.209	84.246	51.375	50.199	68.766	38.3168	530	1	0043240,0097159,0006974,0006807,0036297,0034470,0046483,0016070,0009987,0016072,0003723,0044260,0006139,0000470,0005575,0006396,0006259,1901363,1901360,0006364,0044237,0044238,0008150,0043170,0032991,0071704,0034641,0006725,0090304,0003674,0003676,0034660,0006281
TRINITY_DN310_c1_g1_i8	Ribosomal protein	0.317	18.409	11.615	23.391	13.331	13.011	12.678	35.365	26.121	17.757	17.1995	1713	2	0043240,0044271,0097159,0006974,0043603,0006807,0036297,0034470,0044391,0044249,1990904,0046483,0044267,0016070,0009987,0016072,0003723,0044260,0006139,0000470,0005575,1901564,0006396,0006259,1901363,1901360,0006364,1901576,0043043,0009058,0044237,0044238,0008150,0043170,0006725,0071704,0043604,0009059,0034641,0015934,0090304,0003735,0034645,0003674,0003676,0006518,0005198,0019538,0034660,1901566…
TRINITY_DN310_c1_g1_i10	60S ribosomal protein L10a	1.343	3.743	4.596	4.587	2.355	4.458	33.702	6.586	12.907	15.262	8.9539	870	2	0043240,0097159,0006974,0006807,0036297,0034470,0046483,0016070,0009987,0016072,0003723,0044260,0006139,0000470,0005575,0006396,0006259,1901363,1901360,0006364,0044237,0044238,0008150,0043170,0032991,0071704,0034641,0006725,0090304,0003674,0003676,0034660,0006281
TRINITY_DN4184_c0_g2_i3	Ribosomal protein, large P2	197.974	1241.3	1070.23	1636.4	1038.19	5272.69	5817.02	1534.59	2139.34	3067.75	2301.55	512	1
TRINITY_DN19264_c0_g1_i2	apolipoprotein	0.117	12003.1	0	0.093	0	0	0	0	0.163	9732.73	2173.62	851	1
TRINITY_DN19264_c0_g1_i17	Type-4 ice-structuring protein	0	23.663	0	0	0	0	0	0	0	6.926	3.0589	1439	1	0005575,0005576,0110165
TRINITY_DN19264_c0_g1_i16	Type-4 ice-structuring protein	0	18.413	0	0	0	0	0	0	0.248	3.533	2.2194	1684	1	0005575,0005576,0110165
TRINITY_DN12287_c0_g1_i6	60S ribosomal protein L11	1700.87	1547.79	1238.32	1369.66	948.694	2303.67	3307.4	3127.75	2841.9	5074.89	2346.09	638	1	0022618,1901363,0034622,0009987,0071826,0003723,0003674,0016043,0097159,0022607,0000027,0065003,0043933,0003676,0008150,0071840
TRINITY_DN2645_c0_g1_i12	creatine kinase, flagellar	0.422	0	0.249	0	1.331	0.127	7628.52	21.653	0.119	0	765.242	1600	1	0016772,0003824,0016301,0016740,0003674
TRINITY_DN2645_c0_g1_i4	creatine kinase, flagellar	355.423	224.928	1566.17	104.778	1764.67	1809.08	12.255	31.535	173.605	6.404	604.885	1320	1	0016772,0003824,0016301,0016740,0003674
TRINITY_DN2645_c0_g1_i5	creatine kinase, flagellar	0.755	0	0.345	0	0.43	0.159	5064.92	8.173	0	0	507.478	1478	1	0090407,0030554,0097159,0046314,0043167,0097367,0043168,0006807,1901265,0008144,0016740,0004111,0032559,0032555,0009987,0016772,0032553,0006796,0000166,0006793,1901564,1901566,0071704,1901363,1901576,0003824,0044237,0006599,0008150,0006603,0009058,0005524,0019637,0042398,0042396,0003674,0016775,0035639,0006575,0017076,0036094,0016301
TRINITY_DN2645_c0_g1_i11	creatine kinase, flagellar	0.035	0.185	329.463	0	1898.72	0.645	0	0	0	0	222.905	1438	1	0090407,0030554,0097159,0046314,0043167,0097367,0043168,0006807,1901265,0008144,0016740,0004111,0032559,0032555,0009987,0016772,0032553,0006796,0000166,0006793,1901564,1901566,0071704,1901363,1901576,0003824,0044237,0006599,0008150,0006603,0009058,0005524,0019637,0042398,0042396,0003674,0016775,0035639,0006575,0017076,0036094,0016301
TRINITY_DN2645_c0_g1_i10	Ckmb protein	0	0	0	0	0	0	673.506	0.232	0	0	67.3738	1650	1	0090407,0030554,0097159,0046314,0043167,0043168,0097367,0006807,1901265,0008144,0016740,0004111,0032559,0032555,0009987,0016772,0110165,0006796,0000166,0006793,0005575,0005615,1901564,1901566,1901576,1901363,0003824,0044237,0032553,0006599,0006603,0008150,0071704,0009058,0005524,0019637,0042398,0042396,0003674,0016775,0035639,0006575,0017076,0036094,0016301
TRINITY_DN2645_c0_g1_i16	creatine kinase, flagellar	0	0	0	0	0	0	62.376	0.141	0	0	6.2517	1529	1	0016772,0003824,0016301,0016740,0003674
TRINITY_DN2645_c0_g1_i2	Ckmb protein	0	0	0	0	0	0	39.99	0	0	0	3.999	1701	1	0016740,0016772,0003674,0110165,0003824,0005575,0016301,0005615
TRINITY_DN2645_c0_g1_i13	creatine kinase, flagellar	2.247	0.206	4.74	0.284	7.018	11.274	1.083	0.128	0.533	0	2.7513	1534	1	0016772,0003824,0016301,0016740,0003674
TRINITY_DN520_c0_g1_i6	CD59 glycoprotein	1.821	76.161	3.052	3.817	1.767	2.932	2.443	0	0.564	19900.1	1999.26	603	1
TRINITY_DN520_c0_g1_i5	TRINITY_DN520_c0_g1_i5	0	0	0	0	0	0	0	0	0	111.709	11.1709	501	0
TRINITY_DN520_c0_g1_i4	CD59 glycoprotein	0	0.973	0.297	0.086	0	0.124	0	0.077	0	97.557	9.9114	1638	2
TRINITY_DN3149_c1_g1_i29	gamma-crystallin M3-like	0	0	0.295	0.12	5684.09	0	0	0	0	0	568.451	710	1	0002088,0048856,0008150,0032502
TRINITY_DN3149_c1_g1_i8	Crygm5 protein	0	0	0	0	4601.96	0	0	0	0	0	460.196	599	1	0002088,0048856,0008150,0032502
TRINITY_DN3149_c1_g1_i7	gamma-crystallin M3-like	0	0	0	0	3969.73	0	0	0	0	0	396.973	363	1	0002088,0048856,0008150,0032502
TRINITY_DN3149_c1_g1_i35	Crystallin, gamma M1 -like	0	0	4.418	0	3536.33	0	0	0	0	0	354.075	656	1	0002088,0048856,0008150,0032502
TRINITY_DN3149_c1_g1_i24	gamma-crystallin M3-like	0	0	0	0	2904.87	0	0	0	0	0	290.487	632	1	0002088,0048856,0008150,0032502
TRINITY_DN3149_c1_g1_i34	Crygm5 protein	0	0	0	0	2560.53	0	0	0	0	0	256.053	665	1	0002088,0048856,0008150,0032502
TRINITY_DN3149_c1_g1_i4	gamma-crystallin M3-like	0	0	0	0	1135.24	0	0	0	0	0	113.524	568	1	0002088,0048856,0008150,0032502
TRINITY_DN3149_c1_g1_i12	gamma-crystallin M1-like	0	0	0	0	966.862	0	0	0	0	0	96.6862	665	1	0002088,0048856,0008150,0032502
TRINITY_DN3149_c1_g1_i26	gamma-crystallin M3-like	0	0	0	0	92.767	0	0	0	0	0	9.2767	459	1	0002088,0048856,0008150,0032502
TRINITY_DN3149_c1_g1_i3	gamma-crystallin M3-like	0	0	0	0	9.72	0	0	0	0	0	0.972	659	1	0002088,0048856,0008150,0032502
TRINITY_DN4055_c0_g1_i15	60S ribosomal protein L8	777.442	1851.66	1019.45	1610.87	904.322	3241.62	3672.46	2613.38	2379.41	4262.1	2233.27	896	1	0003674,0043604,0043603,0006807,0043043,0044391,0044249,0002181,1990904,0022625,0044267,0009987,0003723,0044260,0005575,1901564,1901566,0071704,1901363,0009058,0044237,0044238,0008150,0043170,0032991,1901576,0097159,0009059,0034641,0015934,0019843,0034645,0003735,0044271,0003676,0006518,0005198,0019538,0006414,0006412
TRINITY_DN1801_c0_g1_i2	ADP/ATP translocase 3	420.205	0	7.805	0.415	35.81	4198.55	6893.65	41.184	0.634	0.617	1159.89	1340	1
TRINITY_DN1801_c0_g1_i3	ADP/ATP translocase 1	917.555	862.246	1135.53	559.648	1376.58	3606.68	402.848	718.739	310.437	358.178	1024.84	1803	1
TRINITY_DN1801_c0_g1_i5	ADP/ATP translocase 2	0	0	0.216	0	0.285	61.512	8.636	0	0	0	7.0649	1447	2
TRINITY_DN4415_c0_g2_i11	fructose-bisphosphate aldolase A	0.079	0.788	10.455	4.782	10.648	3302.94	16290.5	82.177	25.913	2.189	1973.05	1798	1	1901135,0009056,0019637,0009132,0009259,0009135,0009150,0046034,0043436,0006807,0006165,0046031,0032787,0004332,0072521,0044281,0009179,0046483,0055086,0006090,0006091,0006096,0016052,0110165,0006139,0006796,0016829,0006793,0019693,0016310,0005575,0006753,0019752,1901564,0006757,0071704,1901360,0055114,0005975,0003824,1901575,0044237,0044238,0008150,0009185,0034641,0006725,0006163,0046939,0003674…
TRINITY_DN4415_c0_g2_i4	fructose-bisphosphate aldolase A	0	0	0.254	0.188	0	35.492	20.072	0.13	0.429	0	5.6565	1102	1	1901135,0009056,0019637,0009132,0009259,0009135,0009150,0046034,0043436,0006807,0006165,0046031,0032787,0004332,0072521,0044281,0009179,0046483,0055086,0006090,0006091,0006096,0016052,0110165,0006139,0006796,0016829,0006793,0019693,0016310,0005575,0006753,0019752,1901564,0006757,0071704,1901360,0055114,0005975,0003824,1901575,0044237,0044238,0008150,0009185,0034641,0006725,0006163,0046939,0003674…
TRINITY_DN2735_c0_g1_i12	60S ribosomal protein L9	905.65	1510.67	1511.29	1733.18	908.827	2323.82	2439.14	2462.43	2380.51	5854.61	2203.01	897	1	0043604,0043603,0006807,0043043,0044249,0002181,0044267,0009987,0044260,1901564,1901566,0071704,0009058,0044237,0044238,0008150,0043170,1901576,0009059,0034641,0034645,0019538,0044271,0006518,0006414,0006412
TRINITY_DN3635_c0_g1_i6	40S ribosomal protein SA	860.904	1425.56	659.708	1862.77	778.887	3084.08	3127.07	2528.21	2316.15	4616.54	2125.99	1081	1	0043604,0034455,0043603,0006807,0043043,0044391,0044249,0002181,0022627,1990904,0044267,0009987,0044260,0005575,1901564,1901566,0071704,0030686,0030684,0009058,0044237,0044238,0008150,0043170,1901576,0009059,0034641,0015935,0032991,0034645,0019538,0044271,0006518,0006414,0006412
TRINITY_DN3635_c0_g1_i14	40S ribosomal protein SA	0	28.884	3.151	12.921	8.103	51.305	15.841	22.092	8.93	22.83	17.4057	447	1	0043604,0034455,0043603,0006807,0043043,0044391,0044249,0002181,0022627,1990904,0044267,0009987,0044260,0005575,1901564,1901566,0071704,0030686,0030684,0009058,0044237,0044238,0008150,0043170,1901576,0009059,0034641,0015935,0032991,0034645,0019538,0044271,0006518,0006414,0006412
TRINITY_DN3635_c0_g1_i8	Ribosomal protein SA	1.08	5.022	2.076	11.307	4.69	12.009	16.823	9.472	3.772	5.651	7.1902	570	2	0044271,0043604,0034455,0043603,0006807,0043043,0044391,0044249,0002181,0022627,1990904,0044267,0009987,0044260,0005575,1901564,1901566,1901576,0030686,0030684,0034641,0044237,0044238,0008150,0043170,0071704,0009059,0009058,0015935,0032991,0034645,0003735,0003674,0006518,0005198,0019538,0006414,0006412
TRINITY_DN34763_c0_g1_i1	TRINITY_DN34763_c0_g1_i1	1075.14	1651.27	271.863	3552.9	842.043	486.13	2637.28	7708.79	4589.17	286.423	2310.1	323	0
TRINITY_DN16759_c0_g2_i1	60S ribosomal protein L7	1103.74	1773.07	994.852	1747.44	886.095	2238.35	2762.03	2309.74	2903.22	4729.33	2144.79	989	1	0000463,0006364,0097159,0090304,0006807,0034470,0046483,0016070,0009987,0016072,0003723,0006139,0000470,0006396,1901363,1901360,0044237,0044238,0008150,0043170,0071704,0034641,0006725,0003674,0003676,0034660
TRINITY_DN2724_c0_g1_i36	40S ribosomal protein S17	809.324	1030.49	1081.23	831.441	672.949	2564.46	1648	1048.04	2500.44	3435.94	1562.23	355	1	0005840,0006412,0044271,0043604,0043603,0006807,0110165,0043043,0044249,0044267,0009987,0044260,0043229,0005575,1901564,0043232,1901576,0009058,0044237,0044238,0008150,0043170,0071704,0009059,0034641,0034645,0003735,0003674,0043228,0006518,0005198,0019538,1901566,0043226
TRINITY_DN2724_c0_g1_i3	COMM domain containing 9	238.176	444.661	313.166	485.446	228.689	580.557	634.613	603.274	631.572	1296.15	545.63	1694	2	0005840,0006412,0044271,0043604,0043603,0006807,0044260,0043043,0044249,0016740,0044267,0009987,0110165,0006518,0005575,0007165,1901564,0043232,1901576,0007186,0003824,0034641,0050794,0044237,0044238,0008150,0043170,0071704,0009059,0009058,0034645,0016772,0016773,0019538,0003674,0004143,0043228,0043229,0005198,0003735,0016301,1901566,0043226,0007205
TRINITY_DN2724_c0_g1_i17	40S ribosomal protein S17	10.506	30.589	19.597	21.382	21.161	36.204	29.31	33.299	41.03	51.825	29.4903	2062	3	0005840,0006412,0044271,0043604,0043603,0006807,0044260,0043043,0044249,0016740,0044267,0009987,0110165,0006518,0005575,0007165,1901564,0043232,1901576,0007186,0003824,0034641,0050794,0044237,0044238,0008150,0043170,0071704,0009059,0009058,0034645,0016772,0016773,0019538,0003674,0004143,0043228,0043229,0005198,0003735,0016301,1901566,0043226,0007205
TRINITY_DN965_c0_g1_i6	40S ribosomal protein S10	567.509	1571.93	989.937	1801.23	961.468	2760.25	2594.62	2179.48	2898.26	4836.61	2116.13	681	1	0022627,0015935,0003723,0003674,0003676,0097159,1990904,0005575,1901363,0044391,0032991
TRINITY_DN965_c0_g1_i8	protein kinase c and casein kinase substrate in neurons 1A	2.989	15.872	1.001	0.075	0.401	0	0	0.141	0	0.714	2.1193	993	1	0048869,0051234,0051128,0007010,0043167,0043168,0006996,0110165,0030100,0030030,0031982,0010324,0061024,0005773,0009987,0008289,0032989,0016050,0048812,0120039,0005575,0043231,0005515,0005856,0048858,0060627,0032879,0051179,0051049,0032502,0097708,0050794,0098657,0006900,0016020,0008150,0006897,0009653,0032990,0005768,0005886,0031410,0016192,0003674,0016043,0043228,0043229,0008092,0005543,0043232…
TRINITY_DN965_c0_g1_i16	40S ribosomal protein S10	13.062	0.872	0.11	0.33	0.303	0	0.227	1.301	0.314	0.676	1.7195	966	1	0022627,0015935,0003723,0003674,0003676,0097159,1990904,0005575,1901363,0044391,0032991
TRINITY_DN5837_c0_g1_i4	Phosphodiesterase 6H, cGMP-specific, cone, gamma, -like	0	0	0.585	0	14600.6	0	0.118	0	0	0	1460.13	938	1	0044237,0019001,0032555,0031401,0032553,0006796,0007165,0009967,0009966,1901363,1902533,0045860,0031399,0023014,0044238,0032561,0010646,0010647,0010562,0036094,0030553,0030551,0045937,0043410,0042325,0042327,0032270,0001932,0001934,0050953,0008081,1901564,0048522,0043549,0032501,0060255,0008150,0032268,0050877,0017076,0009987,0042578,0009893,0043167,0043168,0006807,0043412,0033674,0044267,0031325…
TRINITY_DN5837_c0_g1_i3	Phosphodiesterase 6H, cGMP-specific, cone, gamma, -like	0	0	1.096	0	2859.65	0	0	0	0	0	286.075	762	1	0044237,0019001,0032555,0031401,0032553,0006796,0007165,0009967,0009966,1901363,1902533,0045860,0031399,0023014,0044238,0032561,0010646,0010647,0010562,0036094,0030553,0030551,0045937,0043410,0042325,0042327,0032270,0001932,0001934,0050953,0008081,1901564,0048522,0043549,0032501,0060255,0008150,0032268,0050877,0017076,0009987,0042578,0009893,0043167,0043168,0006807,0043412,0033674,0044267,0031325…
TRINITY_DN5837_c0_g1_i5	Phosphodiesterase 6H, cGMP-specific, cone, gamma, -like	0	0	0	0	2498.73	0	0	0	0	0	249.873	1006	1	0023014,0019001,0032555,0031401,0032553,0006796,0007165,0009967,0009966,1901363,1902533,0045860,0031399,0044237,0044238,0032561,0010646,0010647,0010562,0060255,0030553,0030551,0045937,0043168,0042325,0042327,0032270,0001932,0001934,0050953,0008081,1901564,0048522,0043549,0032501,0036094,0008150,0032268,0044267,0017076,0009987,0042578,0009893,0043167,0097367,0006807,0043412,0033674,0050877,0031325…
TRINITY_DN5837_c0_g1_i8	Phosphodiesterase 6H, cGMP-specific, cone, gamma, -like	0	0	0.043	0	2113.41	0	0	0	0	0	211.346	1341	1	0023014,0019001,0032555,0031401,0032553,0006796,0007165,0009967,0009966,1901363,1902533,0045860,0031399,0044237,0044238,0032561,0010646,0010647,0010562,0060255,0030553,0030551,0045937,0043168,0042325,0042327,0032270,0001932,0001934,0050953,0008081,1901564,0048522,0043549,0032501,0036094,0008150,0032268,0044267,0017076,0009987,0042578,0009893,0043167,0097367,0006807,0043412,0033674,0050877,0031325…
TRINITY_DN5837_c0_g1_i10	Retinal cGMP phosphodiesterase, gamma subunit family member	0	0	0	0	1166.24	0	0	0.243	0	0	116.648	1340	1	0044237,0019001,0032555,0031401,0032553,0006796,0007165,0009967,0009966,1901363,1902533,0045860,0031399,0023014,0044238,0032561,0010646,0010647,0010562,0036094,0030553,0030551,0045937,0043410,0042325,0042327,0032270,0001932,0001934,0050953,0008081,1901564,0048522,0043549,0032501,0060255,0008150,0032268,0050877,0017076,0009987,0042578,0009893,0043167,0043168,0006807,0043412,0033674,0044267,0031325…
TRINITY_DN5837_c0_g1_i7	Phosphodiesterase 6H, cGMP-specific, cone, gamma, -like	0	0	0	0	26.939	0	0	0	0	0.228	2.7167	1434	1	0044237,0019001,0032555,0031401,0032553,0006796,0007165,0009967,0009966,1901363,1902533,0045860,0031399,0023014,0044238,0032561,0010646,0010647,0010562,0036094,0030553,0030551,0045937,0043410,0042325,0042327,0032270,0001932,0001934,0050953,0008081,1901564,0048522,0043549,0032501,0060255,0008150,0032268,0050877,0017076,0009987,0042578,0009893,0043167,0043168,0006807,0043412,0033674,0044267,0031325…
TRINITY_DN5837_c0_g1_i16	phosphodiesterase 6H, cGMP-specific, cone, gamma, -like	0	0	0	0	25.461	0	0	0	0	0	2.5461	1441	1	0044237,0019001,0032555,0031401,0032553,0006796,0007165,0009967,0009966,1901363,1902533,0045860,0031399,0023014,0044238,0032561,0010646,0010647,0010562,0036094,0030553,0030551,0045937,0043410,0042325,0042327,0032270,0001932,0001934,0050953,0008081,1901564,0048522,0043549,0032501,0060255,0008150,0032268,0050877,0017076,0009987,0042578,0009893,0043167,0043168,0006807,0043412,0033674,0044267,0031325…
TRINITY_DN5837_c0_g1_i1	Phosphodiesterase 6H, cGMP-specific, cone, gamma, -like	0	0	0	0	22.151	0	0	0	0	0	2.2151	1460	1	0023014,0019001,0032555,0031401,0032553,0006796,0007165,0009967,0009966,1901363,1902533,0045860,0031399,0044237,0044238,0032561,0010646,0010647,0010562,0060255,0030553,0030551,0045937,0043168,0042325,0042327,0032270,0001932,0001934,0050953,0008081,1901564,0048522,0043549,0032501,0036094,0008150,0032268,0044267,0017076,0009987,0042578,0009893,0043167,0097367,0006807,0043412,0033674,0050877,0031325…
TRINITY_DN8058_c0_g1_i5	40S ribosomal protein S7	1157.94	1596.61	1245.01	1484.87	778.18	2249.35	2264.13	1960.05	2606.07	5113.38	2045.56	916	1	0006364,0044271,0043604,0090304,0034455,0043603,0006807,0034470,0044391,0044249,0022627,1990904,0046483,0044267,0016070,0009987,0016072,0044260,0006139,0044085,0005575,1901564,0006396,1901576,1901360,0030686,0022613,0043043,0034660,0009058,0042274,0044237,0044238,0008150,0043170,0032991,0071704,0009059,0034641,0015935,0006725,0034645,0019538,0003674,0006518,0005198,0003735,0030684,1901566,0006412…
TRINITY_DN28594_c0_g1_i1	myosin-13	0.178	0	0.209	0.258	41.064	0	17310.9	15.539	0	0	1736.82	446	1
TRINITY_DN2950_c0_g1_i5	Ribosomal protein L28	644.526	1583.59	1308.73	1525	1044.22	2102.77	2795.66	2423.97	2552.95	4208.25	2018.97	566	1	0005840,0006412,0043009,0044271,0043604,0043603,0006807,0044260,0043043,0044249,0044267,0009987,0110165,0006518,0007275,0005575,1901564,0043232,1901576,0009792,0048856,0032502,0032501,0009058,0044237,0044238,0008150,0043170,0071704,0009059,0034641,0034645,0003735,0003674,0043228,0043229,0005198,0019538,1901566,0043226
TRINITY_DN2645_c1_g1_i1	creatine kinase, flagellar	1.51	0	0.118	0.144	8.453	0.138	16839	60.704	0	0	1691.01	628	1	0016772,0003824,0016301,0016740,0003674
TRINITY_DN280_c0_g3_i1	slow myosin heavy chain 1	0.093	0	0.109	0	18.202	0	16747.2	147.968	0	0	1691.36	1110	1	0007010,0031032,0006996,0006807,0043412,0006796,0005737,0016740,0030036,0044267,0009987,0140096,0044260,0006468,0006793,0016310,0005575,1901564,0006464,0005856,0043228,0003824,0018193,0044237,0044238,0110165,0008150,0043170,0071704,0018210,0030029,0016772,0016773,0003674,0016043,0018107,0036211,0043229,0019538,0004674,0016301,0043232,0043226,0004672,0071840
TRINITY_DN1559_c0_g1_i11	60S ribosomal protein L23	704.418	1541.84	1368.86	1525.3	835.553	2036.14	1966.82	1798.31	2571.39	4684.95	1903.36	796	1	0017038,0045892,0031647,0051169,0070161,1901796,0090304,0008104,0010948,0042127,0009893,0071236,1901798,0016032,0032986,0019083,0098562,0009987,0045861,0034613,1903507,0005515,0010556,1901653,1901652,0070972,0010558,0009967,0009966,0098772,1901363,1901361,1901360,0006605,0050821,0031399,0044237,0044238,0031396,0031982,0072599,0034504,0006606,1904667,1904666,0072594,0033365,0010646,0071417,0090150…
TRINITY_DN11816_c0_g1_i1	slow myosin heavy chain 1	0	0	0.139	0	11.886	0.324	16171.1	138.595	0.156	0	1632.22	566	1	0007010,0031032,0006996,0006807,0043412,0006796,0005737,0016740,0030036,0044267,0009987,0140096,0044260,0006468,0006793,0016310,0005575,1901564,0006464,0005856,0043228,0003824,0018193,0044237,0044238,0110165,0008150,0043170,0071704,0018210,0030029,0016772,0016773,0003674,0016043,0018107,0036211,0043229,0019538,0004674,0016301,0043232,0043226,0004672,0071840
TRINITY_DN339_c0_g2_i15	tropomyosin 4A -like	0.723	2.829	0.459	0.677	0.124	9279.83	0.697	0.84	0	0	928.618	1116	1	0051015,0005515,0006936,0099081,0099080,0009987,0097435,0110165,0044877,0005575,0003012,0099513,0099512,0032501,0003779,0008150,0005884,0007015,0003674,0003008,0016043,0008092,0071840
TRINITY_DN339_c0_g2_i4	tropomyosin beta chain	0	4.62	0	3.475	0.516	7308.31	0	0	0	0	731.692	399	1	0051015,0005515,0006936,0099081,0099080,0009987,0097435,0110165,0044877,0005575,0003012,0099513,0099512,0032501,0003779,0008150,0005884,0007015,0003674,0003008,0016043,0008092,0071840
TRINITY_DN339_c0_g2_i5	tropomyosin beta chain	0.686	3.339	3.49	0.24	2.589	287.638	1094.15	17.014	1.594	0	141.074	1090	1	0051015,0005515,0006936,0099081,0099080,0009987,0097435,0110165,0044877,0005575,0003012,0099513,0099512,0032501,0003779,0008150,0005884,0007015,0003674,0003008,0016043,0008092,0071840
TRINITY_DN339_c0_g2_i10	tropomyosin alpha-3 chain-like	106.476	79.154	61.141	29.533	28.051	34.954	7.977	42.764	49.751	42.574	48.2375	585	1	0051015,0005515,0006936,0099081,0099080,0009987,0097435,0110165,0044877,0005575,0003012,0099513,0099512,0032501,0003779,0008150,0005884,0007015,0003674,0003008,0016043,0008092,0071840
TRINITY_DN339_c0_g2_i2	tropomyosin alpha-4 chain	5.462	47.844	17.598	21.67	5.38	28.047	9.74	87.462	38.932	17.864	27.9999	1016	1	0051015,0005515,0006936,0099081,0099080,0009987,0097435,0110165,0044877,0005575,0003012,0099513,0099512,0032501,0003779,0008150,0005884,0007015,0003674,0003008,0016043,0008092,0071840
TRINITY_DN339_c0_g2_i12	tropomyosin alpha-3 chain-like	5.269	19.251	11.988	8.558	2.627	12.717	2.955	9.34	10.559	7.9	9.1164	614	1	0051015,0005515,0006936,0099081,0099080,0009987,0097435,0110165,0044877,0005575,0003012,0099513,0099512,0032501,0003779,0008150,0005884,0007015,0003674,0003008,0016043,0008092,0071840
TRINITY_DN339_c0_g2_i3	tropomyosin alpha-3 chain-like	15.34	10.081	10.125	5.337	6.936	2.364	0.477	7.171	4.578	7.637	7.0046	769	1	0051015,0005515,0006936,0099081,0099080,0009987,0097435,0110165,0044877,0005575,0003012,0099513,0099512,0032501,0003779,0008150,0005884,0007015,0003674,0003008,0016043,0008092,0071840
TRINITY_DN339_c0_g2_i6	tropomyosin 4A -like	0.132	0.257	0.036	0.576	0.158	13.972	0.06	0.547	0.446	0.293	1.6477	1634	1	0051015,0005515,0006936,0099081,0099080,0009987,0097435,0110165,0044877,0005575,0003012,0099513,0099512,0032501,0003779,0008150,0005884,0007015,0003674,0003008,0016043,0008092,0071840
TRINITY_DN19533_c0_g1_i5	Ribosomal protein L27a	823.564	1452.79	1105.7	1308.74	729.381	1849.34	2568.2	2028.74	1892.27	4751.37	1851.01	688	1
TRINITY_DN2299_c0_g1_i20	40S ribosomal protein S21	856.116	1496.44	1261.97	2001.44	697.874	1424.74	1751.52	1720.66	2990.84	4329.4	1853.1	451	1	0016072,0000462,0006364,0044271,0043604,0090304,0043603,0006807,0034470,0044391,0044249,0022627,1990904,0046483,0044267,0016070,0009987,0030490,0044260,0006139,0005575,1901564,0006396,1901576,1901360,0043043,0009058,0044237,0044238,0008150,0043170,0032991,0071704,0009059,0034641,0015935,0006725,0034645,0003735,0003674,0006518,0005198,0019538,0034660,1901566,0006412
TRINITY_DN2299_c0_g1_i8	40S ribosomal protein S21	3.818	17.64	11.934	18.694	9.289	10.862	10.121	13.302	37.139	32.79	16.5589	1311	3	0016072,0000462,0006364,0044271,0043604,0090304,0043603,0006807,0034470,0044391,0044249,0022627,1990904,0046483,0044267,0016070,0009987,0030490,0044260,0006139,0005575,1901564,0006396,1901576,1901360,0043043,0009058,0044237,0044238,0008150,0043170,0032991,0071704,0009059,0034641,0015935,0006725,0034645,0003735,0003674,0006518,0005198,0019538,0034660,1901566,0006412
TRINITY_DN2299_c0_g1_i17	40S ribosomal protein S21	51.16	5.041	5.726	8.649	6.052	4.301	13.952	4.729	12.193	21.712	13.3515	551	1	0016072,0000462,0006364,0044271,0043604,0090304,0043603,0006807,0034470,0044391,0044249,0022627,1990904,0046483,0044267,0016070,0009987,0030490,0044260,0006139,0005575,1901564,0006396,1901576,1901360,0043043,0009058,0044237,0044238,0008150,0043170,0032991,0071704,0009059,0034641,0015935,0006725,0034645,0003735,0003674,0006518,0005198,0019538,0034660,1901566,0006412
TRINITY_DN2982_c0_g1_i2	60S ribosomal protein L18a	657.545	1793.91	818.918	1866.86	652.9	1823.23	2437.92	2454.77	2098.77	3906.32	1851.11	706	1
TRINITY_DN494_c0_g1_i6	Vitellogenin	0	0	0	0	1.383	0.065	0.095	0	0.86	8224.33	822.674	1113	1	0033993,0005319,0003674,0009725,1901700,0032355,0010033,0008150,0014070
TRINITY_DN494_c0_g1_i8	Vitellogenin B	0	0	0.198	0	0	0	0	0.095	0.039	5650.26	565.059	2266	1	0033993,0005319,0003674,0009725,1901700,0032355,0010033,0008150,0014070
TRINITY_DN494_c0_g1_i14	Vitellogenin	0	0	0.012	0	0.018	0	0	0.027	0	1438.16	143.822	5100	1	0033993,0005319,0003674,0009725,1901700,0032355,0010033,0008150,0014070
TRINITY_DN494_c0_g1_i33	Vitellogenin	0.024	0	0	0	0.297	0	0	0	0	357.33	35.7651	1970	4	0033993,0005319,0003674,0009725,1901700,0032355,0010033,0008150,0014070
TRINITY_DN494_c0_g1_i42	Vitellogenin	0	0	0.054	0	0.037	0	0	0	0	194.921	19.5012	2469	5	0033993,0005319,0003674,0009725,1901700,0032355,0010033,0008150,0014070
TRINITY_DN494_c0_g1_i46	Synovial sarcoma, X breakpoint 2-interacting protein A -related	0.72	1.276	2.216	3.936	20.034	0	0.645	4.292	0	0	3.3119	3614	1
TRINITY_DN494_c0_g1_i58	Synovial sarcoma, X breakpoint 2-interacting protein A -related	0	0.05	0	0.212	25.912	0	0	0	0.046	2.801	2.9021	4305	2	0033993,0005319,0003674,0009725,1901700,0032355,0010033,0008150,0014070
TRINITY_DN494_c0_g1_i49	Vitellogenin	0	0	0	0	0	0	0	0	0	28.004	2.8004	5262	2	0033993,0005319,0003674,0009725,1901700,0032355,0010033,0008150,0014070
TRINITY_DN494_c0_g1_i52	SI DKEY-4C23 3 -like	0	0	0	0	0	0	0	0	0	18.116	1.8116	715	1	0033993,0005319,0003674,0009725,1901700,0032355,0010033,0008150,0014070
TRINITY_DN1224_c0_g1_i11	Ribosomal L18e/L15P domain-containing protein	474.272	1305.91	807.273	2045.13	802.746	2118.01	2887.91	2568.02	2241.38	3073.59	1832.43	715	1	0097159,0003723,1901363,0003674,0003676
TRINITY_DN12547_c0_g1_i12	40S ribosomal protein S9	805.064	1392.54	780.351	1941.31	767.3	2589.92	2383.74	2182.62	2048.89	2435.05	1732.68	805	1	1901363,0015935,1990904,0019843,0003723,0003674,0003676,0097159,0005575,0022627,0044391,0032991
TRINITY_DN12547_c0_g1_i3	Ribosomal S4 domain-containing protein	43.914	89.377	38.392	78.504	38.067	84.553	154.539	118.087	113.887	122.577	88.1897	1156	2	0044271,0043604,0043603,0006807,0043043,0044391,0044249,0022627,1990904,0044267,0009987,0003723,0044260,0005575,1901564,1901566,0071704,1901363,0009058,0044237,0044238,0008150,0043170,1901576,0097159,0009059,0034641,0015935,0032991,0019843,0034645,0003735,0003674,0003676,0006518,0005198,0019538,0006412
TRINITY_DN12547_c0_g1_i14	40S ribosomal protein S9	15.524	11.611	1.372	7.725	2.014	6.198	62.953	4.802	16.324	24.402	15.2925	1879	3	0031224,0044271,0043604,0043603,0006807,0044260,0043043,0044391,0044249,0022627,1990904,0044267,0009987,0003723,0110165,0005575,1901564,1901566,1901576,1901363,0009058,0044237,0044238,0016021,0008150,0043170,0071704,0097159,0009059,0034641,0015935,0032991,0019843,0034645,0003735,0003674,0003676,0006518,0005198,0019538,0006412
TRINITY_DN12547_c0_g1_i2	Ribosomal protein S9	1.833	14.107	2.708	8.469	3.832	8.989	14.149	8.446	15.488	10.598	8.8619	2160	4	0031224,0044271,0043604,0043603,0006807,0044260,0043043,0044391,0044249,0022627,1990904,0044267,0009987,0003723,0110165,0005575,1901564,1901566,1901576,1901363,0009058,0044237,0044238,0016021,0008150,0043170,0071704,0097159,0009059,0034641,0015935,0032991,0019843,0034645,0003735,0003674,0003676,0006518,0005198,0019538,0006412
TRINITY_DN792_c0_g1_i5	60S ribosomal protein L13	646.816	1353.93	1070.77	1627.83	745.969	2364.11	2730.06	2223.53	2193.37	3096.61	1805.3	760	1	0005840,0006412,0044271,0097159,0043603,0006807,0044260,0043043,0051726,0044249,0044267,0009987,0003723,0110165,0006518,0005575,1901564,0043232,1901576,1901363,0009058,0050794,0044237,0044238,0008150,0043170,0071704,0043604,0009059,0034641,0034645,0003735,0003674,0003676,0043228,0043229,0005198,0019538,1901566,0043226
TRINITY_DN195_c2_g1_i2	Lysozyme	3.95	893.41	284.902	2688.2	138.17	845.913	159.688	996.744	11674.3	1915.44	1960.08	657	1	0016787,0044419,0061783,0051707,0006952,0009987,0016798,0003674,0004553,0003824,0019835,0009617,0050830,0043207,0003796,0050829,0042742,0008150,0098542
TRINITY_DN195_c2_g1_i1	Lysozyme	0	8.456	1.133	20.344	0.997	8.004	1.584	18.151	54.292	64.195	17.7156	760	1	0016787,0044419,0061783,0051707,0006952,0009987,0016798,0003674,0004553,0003824,0019835,0009617,0050830,0043207,0003796,0050829,0042742,0008150,0098542
TRINITY_DN1622_c0_g1_i5	60S ribosomal protein L37	671.127	1360.13	1037.33	1505.11	745.836	2111.24	2187.83	1917.58	2641.55	3769.38	1794.71	685	1	0097159,0003723,1901363,0003674,0003676
TRINITY_DN12510_c0_g1_i7	Ribosomal protein L15	616.983	1267.4	625.51	1527.01	595.153	2015.48	2213.54	2012.68	1802.76	3434.22	1611.08	927	1	0005840,0003674,0043604,0043603,0006807,0110165,0043043,0044249,0002181,0044267,0009987,0003723,0044260,0043229,0005575,1901564,0043232,0071704,1901363,0009058,0044237,0044238,0008150,0043170,1901576,0097159,0009059,0034641,0034645,0003735,0044271,0003676,0043228,0006518,0043226,0005198,0019538,0006414,1901566,0006412
TRINITY_DN12510_c0_g1_i4	Ribosomal protein L15	87.656	155.081	87.121	74.916	60.25	79.404	99.174	105.138	172.124	523.271	144.413	1569	1	0005840,0003674,0043604,0043603,0006807,0110165,0043043,0044249,0002181,0044267,0009987,0003723,0044260,0043229,0005575,1901564,0043232,0071704,1901363,0009058,0044237,0044238,0008150,0043170,1901576,0097159,0009059,0034641,0034645,0003735,0044271,0003676,0043228,0006518,0043226,0005198,0019538,0006414,1901566,0006412
TRINITY_DN12510_c0_g1_i3	Ribosomal protein L15	37.194	8.375	4.738	5.049	3.672	0.847	11.533	6.835	2.673	0	8.0916	1035	1	0005840,0003674,0043604,0043603,0006807,0110165,0043043,0044249,0002181,0044267,0009987,0003723,0044260,0043229,0005575,1901564,0043232,0071704,1901363,0009058,0044237,0044238,0008150,0043170,1901576,0097159,0009059,0034641,0034645,0003735,0044271,0003676,0043228,0006518,0043226,0005198,0019538,0006414,1901566,0006412
TRINITY_DN568_c0_g1_i9	keratin, type II cytoskeletal 8	2.421	18.383	2.387	0	843.667	4.713	3055.13	12665.3	0	0	1659.2	2699	1
TRINITY_DN568_c0_g1_i2	keratin, type II cytoskeletal 8	0.176	743.738	10.008	21.907	6.671	12.097	2.789	17.802	7.224	25.923	84.8335	2333	1	0005882,0099081,0099080,0110165,0005575,0045095,0099513,0099512
TRINITY_DN568_c0_g1_i1	keratin, type II cytoskeletal 8	0	346.615	0	0	27.336	0	25.734	219.773	0	0	61.9458	1825	1	0005882,0099081,0099080,0110165,0005575,0045095,0099513,0099512
TRINITY_DN568_c0_g1_i5	keratin, type II cytoskeletal 8	0	0	0	0.064	24.41	0	34	125.385	0	0.153	18.4012	2678	1
TRINITY_DN5091_c0_g1_i8	60S ribosomal protein L30	457.791	1156.61	1168.21	1445.27	724.41	1498.66	1689.43	1484.01	2549.83	4637.36	1681.16	607	1	1901363,0015934,0022625,0003735,0003723,0003674,0003676,0097159,1990904,0005198,0005575,0044391,0032991
TRINITY_DN5091_c0_g1_i4	60S ribosomal protein L30	309.622	43.34	21.854	78.385	23.435	47.567	29.094	38.921	34.939	22.301	64.9458	576	1	1901363,0015934,0022625,0003735,0003723,0003674,0003676,0097159,1990904,0005198,0005575,0044391,0032991
TRINITY_DN22579_c0_g1_i29	gamma-crystallin M3-like	0	0	0	0	5676.12	0	0	0	0	0	567.612	233	1	0002088,0048856,0008150,0032502
TRINITY_DN22579_c0_g1_i30	gamma-crystallin M1-like	0	0	0.153	0	3561.39	0	0	0	0	0	356.154	533	1	0002088,0048856,0008150,0032502
TRINITY_DN22579_c0_g1_i17	Crystallin, gamma M1 -like	0	0	0	0	3039.57	0	0	0	0	0	303.957	363	1	0002088,0048856,0008150,0032502
TRINITY_DN22579_c0_g1_i22	Crygm5 protein	0	0	0	0	2420.28	0	0	0	0	0	242.028	236	1	0002088,0048856,0008150,0032502
TRINITY_DN22579_c0_g1_i14	gamma-crystallin M3-like	0	0	0	0	1433.3	0	0	0	0	0	143.33	471	1	0002088,0048856,0008150,0032502
TRINITY_DN22579_c0_g1_i33	gamma-crystallin M1-like	0	0	0	0	880.039	0	0	0	0	0	88.0039	305	1	0002088,0048856,0008150,0032502
TRINITY_DN22579_c0_g1_i4	Crystallin, gamma M1 -like	0	0	0.722	0	739.515	0	0	0	0	0	74.0237	340	1	0002088,0048856,0008150,0032502
TRINITY_DN22579_c0_g1_i24	Crystallin, gamma M1 -like	0	0	0	0	650.246	0	0	0	0	0	65.0246	270	1	0002088,0048856,0008150,0032502
TRINITY_DN22579_c0_g1_i6	Crystallin, gamma M1 -like	0	0	0	0	503.663	0	0	0	0	0	50.3663	238	1	0002088,0048856,0008150,0032502
TRINITY_DN22579_c0_g1_i8	gamma-crystallin M1-like	0	0	0	0	208.19	0	0	0	0	0	20.819	563	1	0002088,0048856,0008150,0032502
TRINITY_DN22579_c0_g1_i9	Gamma-crystallin M2	0	0	0	0	134.034	0	0	0	0	0	13.4034	299	1	0002088,0048856,0008150,0032502
TRINITY_DN22579_c0_g1_i10	gamma-crystallin M3-like	0	0	0	0	63.236	0	0	0	0	0	6.3236	341	1	0002088,0048856,0008150,0032502
TRINITY_DN22579_c0_g1_i5	gamma-crystallin M1-like	0	0	0	0	12.369	0	0	0	0	0	1.2369	536	1	0002088,0048856,0008150,0032502
TRINITY_DN22579_c0_g1_i18	Crygm5 protein	0	0	0	0	2.048	0	0	0	0	0	0.2048	361	1	0002088,0048856,0008150,0032502
TRINITY_DN4031_c0_g1_i15	40S ribosomal protein S4, X	509.494	1427.5	735.085	1427.53	599.214	1861.42	2366.07	1896.74	2058.49	2557.93	1543.95	1066	1	0097159,0044391,0044249,0022627,1990904,0009987,0003723,0044260,0005575,1901576,1901363,0044237,0008150,0043170,0071704,0009059,0009058,0015935,0032991,0034645,0003674,0003676,0006414
TRINITY_DN4031_c0_g1_i9	40S ribosomal protein S4, X	55.439	159.587	85.915	177.447	79.742	266.113	252.076	178.843	288.896	249.568	179.363	1394	1	0097159,0044391,0044249,0022627,1990904,0009987,0003723,0044260,0005575,1901576,1901363,0044237,0008150,0043170,0071704,0009059,0009058,0015935,0032991,0034645,0003674,0003676,0006414
TRINITY_DN19717_c0_g1_i2	beta-2-microglobulin-like	10.985	5097.45	930.094	3475.78	291.136	1569.46	462.17	1702.49	3138.5	1011.57	1768.96	1922	1
TRINITY_DN19717_c0_g1_i5	beta-2-microglobulin	0	14.626	1.089	10.973	0.971	4.578	2.769	7.367	8.819	3.175	5.4367	3402	1
TRINITY_DN1068_c5_g1_i1	Proopiomelanocortin-B	0	0.881	19605.9	0.925	1.528	0.255	0	0	0	0.31	1960.98	664	1	0098772,0030546,0030545,0005102,0003674,0005515,0048018,0005179,0005575,0005576,0110165
TRINITY_DN18423_c0_g1_i9	slow myosin heavy chain 1	0	0	0.162	0	1.035	0	9723.13	47.093	0	0	977.142	515	1	0007010,0031032,0006996,0006807,0043412,0006796,0005737,0016740,0030036,0044267,0009987,0140096,0044260,0006468,0006793,0016310,0005575,1901564,0006464,0005856,0043228,0003824,0018193,0044237,0044238,0110165,0008150,0043170,0071704,0018210,0030029,0016772,0016773,0003674,0016043,0018107,0036211,0043229,0019538,0004674,0016301,0043232,0043226,0004672,0071840
TRINITY_DN18423_c0_g1_i1	slow myosin heavy chain 1	0	0	0	0	13.513	0	4620.28	52.733	0	0	468.653	503	1	0007010,0031032,0006996,0006807,0043412,0006796,0005737,0016740,0030036,0044267,0009987,0140096,0044260,0006468,0006793,0016310,0005575,1901564,0006464,0005856,0043228,0003824,0018193,0044237,0044238,0110165,0008150,0043170,0071704,0018210,0030029,0016772,0016773,0003674,0016043,0018107,0036211,0043229,0019538,0004674,0016301,0043232,0043226,0004672,0071840
TRINITY_DN18423_c0_g1_i7	slow myosin heavy chain 1	0	0	0	0	0.272	0	23.056	1.177	0	0	2.4505	742	1	0006996,0016818,0007010,0016817,0030554,0051015,0097159,0031032,0043167,0043168,0018210,0097367,0006807,0044260,0006796,0008144,0005737,0043412,0032559,0030036,0044267,0032555,0009987,0140096,1901265,0016459,0006468,0110165,0000166,0006793,0016310,0044877,1901564,0006464,0016787,0071704,1901363,0003824,0017076,0016740,0003774,0018193,0044237,0044238,0003779,0008150,0043170,0016462,0017111,0032991…
TRINITY_DN1771_c0_g1_i1	Receptor for activated C kinase 1	688.63	1538.11	866.36	1576.63	718.591	1996.19	2081.75	1838.27	2090.79	3463.9	1685.92	1269	1	0032270,0042325,0009893,0050794,0045937,0044260,0019220,0019222,0043021,0006807,0043412,0043022,0044391,0019899,0001932,0042327,0080090,1990904,0044267,0009987,0031325,0006796,0031323,0005515,0051171,0006468,0044877,0006793,0016310,0005575,0005634,0043231,1901564,0048522,0006464,0051174,0051247,0051246,0051173,0110165,0032268,0010604,0031399,0044237,0044238,0022627,0008150,0043170,0071704,0015935…
TRINITY_DN2414_c0_g1_i1	Guanine nucleotide-binding protein subunit gamma	0	0	7.816	0	18483.3	0	0.486	0	0.154	0	1849.18	570	1	0009987,0007165,0008150,0050794,0007186
TRINITY_DN2414_c0_g1_i2	guanine nucleotide-binding protein G T subunit gamma-T1	0	0	0	0	71.12	0	0	0	0	0	7.112	763	1	0016787,0016462,1905360,0017111,0032991,0098796,0098797,0009987,0016817,0007186,0003674,0003824,0005834,0016818,1902494,0003924,0050794,0005575,0007165,0008150
TRINITY_DN2414_c0_g1_i3	guanine nucleotide-binding protein G T subunit gamma-T1	0	0	0	0	28.207	0	0	0	0	0	2.8207	869	1	0016787,0016462,1905360,0017111,0032991,0098796,0098797,0009987,0016817,0007186,0003674,0003824,0005834,0016818,1902494,0003924,0050794,0005575,0007165,0008150
TRINITY_DN38690_c0_g1_i1	slow myosin heavy chain 1	0	0	0	0	17.718	0	14289.8	6.293	0	0	1431.38	318	1	0007010,0031032,0006996,0006807,0043412,0006796,0005737,0016740,0030036,0044267,0009987,0140096,0044260,0006468,0006793,0016310,0005575,1901564,0006464,0005856,0043228,0003824,0018193,0044237,0044238,0110165,0008150,0043170,0071704,0018210,0030029,0016772,0016773,0003674,0016043,0018107,0036211,0043229,0019538,0004674,0016301,0043232,0043226,0004672,0071840
TRINITY_DN9460_c1_g1_i1	Myosin heavy chain, fast skeletal muscle	0.311	0	0.182	0	7.218	0	14102.6	8.239	0	0	1411.86	481	1	0007010,0031032,0006996,0006807,0043412,0006796,0005737,0016740,0030036,0044267,0009987,0140096,0044260,0006468,0006793,0016310,0005575,1901564,0006464,0005856,0043228,0003824,0018193,0044237,0044238,0110165,0008150,0043170,0071704,0018210,0030029,0016772,0016773,0003674,0016043,0018107,0036211,0043229,0019538,0004674,0016301,0043232,0043226,0004672,0071840
TRINITY_DN852_c2_g1_i5	Myosin, light chain 7, regulatory	0	0	0.662	0	0	16147.9	0	0.083	0.248	0	1614.89	877	1
TRINITY_DN852_c2_g1_i9	Myosin, light chain 7, regulatory	14.303	2.66	54.433	30.334	90.956	25.602	1.986	5.351	6.118	3.646	23.5389	1622	1	1903524,0010927,0051239,0031032,0043167,0043169,0006996,0055003,0033002,0055005,0055004,0007010,0014855,0045823,0008283,0030036,0009987,0097435,0045214,1903522,0003013,0060038,0048646,0051240,0032502,0032501,0044057,0008150,0060047,0005509,0030239,0030029,0003015,0008016,0003674,0003008,0016043,0070925,0046872,0022607,0071840
TRINITY_DN852_c2_g1_i7	Myosin, light chain 7, regulatory	0	0	0	0	0	87.095	0	0	0	0	8.7095	695	2	0043169,0046872,0005509,0003674,0043167
TRINITY_DN852_c2_g1_i6	Myosin, light chain 7, regulatory	0	0	0	0	0	41.77	0	0	0	0	4.177	1804	5	0005509,0003674,0110165,0043167,0031224,0043169,0005575,0046872,0016021
TRINITY_DN852_c2_g1_i2	Myosin, light chain 7, regulatory	0	0	0	0	0	14.033	0	0	0	0	1.4033	1727	5	1903524,0043167,0031224,0051239,0031032,0010927,0043169,0006996,0055003,0033002,0055005,0055004,0007010,0014855,0045823,0008283,0030036,0009987,0097435,0045214,0110165,1903522,0003013,0060038,0048646,0051240,0032502,0032501,0044057,0005575,0016021,0008150,0060047,0005509,0030239,0030029,0003015,0008016,0003674,0003008,0016043,0070925,0046872,0022607,0071840
TRINITY_DN139_c2_g2_i1	keratin, type I cytoskeletal 13-like	0.853	0	0.426	0	1196.82	0.039	4792.51	9818.34	0	0	1580.9	1723	1
TRINITY_DN139_c2_g2_i2	keratin, type I cytoskeletal 12	0	0	0.136	0	77.633	0	226.636	370.072	0	0	67.4477	2293	2
TRINITY_DN12802_c0_g1_i3	ferritin	599.752	1975.77	1581.41	1160.91	952.145	2580.24	3250.03	1114.78	1821.33	1289.47	1632.59	1147	1	0005737,0005575,0110165
TRINITY_DN513_c31_g1_i1	TRINITY_DN513_c31_g1_i1	0	0	18736.2	0	0.137	0	0	0	0.361	0	1873.67	670	0
TRINITY_DN5699_c0_g1_i2	Alpha 2-globin	3.325	15.685	618.214	1146.74	55.534	1106.79	106.876	41.133	15579.3	59.501	1873.31	727	1	1901363,0048037,0005833,0043177,0003674,0020037,0097159,0019825,0005344,0046906,0043167,0005575,0043169,0036094,0046872,0008144,0032991
TRINITY_DN5699_c0_g1_i1	Alpha 2-globin	0.055	0	4.324	10.551	1.695	13.815	2.055	0.542	83.32	0.569	11.6926	997	3	1901363,0048037,0005833,0043177,0003674,0020037,0097159,0019825,0005344,0046906,0043167,0005575,0043169,0036094,0046872,0008144,0032991
TRINITY_DN71_c0_g1_i12	40S ribosomal protein S3	743.901	1296.22	756.577	1249.5	720.992	2009.91	2917.93	2363.92	1957.18	2137.08	1615.32	924	1	0043065,0009966,0043226,0097159,0006974,0043067,0097190,2001233,0010942,0010941,0044260,0043068,0006807,0044391,0022627,1990904,0046483,0009987,0110165,0006139,0005575,0005634,0043231,0048522,0009967,0006259,1901363,1901360,0003677,0050794,0044237,0044238,0008150,0043170,0032991,0071704,2001235,0034641,0015935,0006725,0090304,0007165,0010646,0010647,0003674,0023051,0003676,0043229,0042981,0023056…
TRINITY_DN271_c3_g1_i5	60S ribosomal protein L23a	567.645	1116.95	1177.16	1061.33	680.372	1866.11	1758.72	1545.76	2314.98	3922.87	1601.19	1243	1	0022618,0000027,0009987,0071826,0016043,0034622,0043933,0065003,0022607,0008150,0071840
TRINITY_DN9509_c1_g2_i2	Ribosomal L18 c domain-containing protein	738.381	1133.55	720.762	1447.86	551.344	2146.48	2195.64	1970.27	2120.97	2993.9	1601.91	1126	1	0005840,0008097,0006412,0044271,0097159,0000027,0043603,0006807,0044260,0043043,0044249,0044267,0009987,0003723,0110165,0003676,0006518,0005575,1901564,0043232,1901576,1901363,0034622,0022618,0009058,0044237,0044238,0043933,0008150,0043170,0071704,0043604,0009059,0034641,0019843,0034645,0003735,0065003,0071826,0003674,0016043,0043228,0043229,0005198,0019538,1901566,0043226,0022607,0071840
TRINITY_DN2145_c1_g1_i11	fibrinogen gamma chain	0	0.102	0.029	1.366	0.261	0.174	0	0.065	0.82	13432.8	1343.56	1887	1
TRINITY_DN2145_c1_g1_i1	fibrinogen gamma chain	0	0	0	0.032	0	0	0	0	0	79.579	7.9611	2833	4	0050817,0050878,0032501,0065008,0007599,0007596,0008150
TRINITY_DN2145_c1_g1_i4	fibrinogen gamma chain	0	0	0	0.173	0	0	0	0	0	74.511	7.4684	984	1
TRINITY_DN2145_c1_g1_i9	fibrinogen gamma chain	0	0	0	0	0	0	0	0	0	38.148	3.8148	1574	2	0051258,0065003,0006807,0072378,0030168,0022607,0005102,0072376,0005515,0005575,0005577,1901564,0044238,0043933,0008150,0043170,0071704,0032991,0019538,0003674,0016043,0001775,0034622,0009987,0071840
TRINITY_DN2145_c1_g1_i10	fibrinogen gamma chain	0	0	0	0	0	0	0	0	0	34.569	3.4569	824	2
TRINITY_DN2145_c1_g1_i7	fibrinogen gamma chain	0	0	0	0	0	0	0	0	0	32.046	3.2046	1831	2	0051258,0065003,0006807,0072378,0030168,0022607,0005102,0072376,0005515,0005575,0005577,1901564,0044238,0043933,0008150,0043170,0071704,0032991,0019538,0003674,0016043,0001775,0034622,0009987,0071840
TRINITY_DN250_c0_g1_i4	Glyceraldehyde-3-phosphate dehydrogenase	240.555	343.476	4.375	159.906	7.999	1059.78	8836.84	59.762	3.694	424.926	1114.13	2723	2
TRINITY_DN250_c0_g1_i13	Glyceraldehyde-3-phosphate dehydrogenase	48.28	57.229	0	25.884	0	322.557	1780.61	7.262	4.095	101.846	234.776	2767	2
TRINITY_DN250_c0_g1_i36	glyceraldehyde-3-phosphate dehydrogenase	0	10.083	0	1.699	0.047	42.767	48.702	0.592	0	28.028	13.1918	1695	2
TRINITY_DN250_c0_g1_i26	Glyceraldehyde-3-phosphate dehydrogenase	0.214	17.446	3.105	17.182	5.581	0	0	10.918	3.046	0	5.7492	2867	2
TRINITY_DN250_c0_g1_i18	glyceraldehyde-3-phosphate dehydrogenase	0.234	5.317	0	1.549	0	29.186	2.173	0	0.034	5.288	4.3781	1842	2
TRINITY_DN250_c0_g1_i10	Glyceraldehyde-3-phosphate dehydrogenase	0	0.883	0	0	0	15.418	2.896	0	0	10.175	2.9372	2834	2
TRINITY_DN1259_c18_g1_i1	Serpin peptidase inhibitor, clade B ovalbumin , member 1	0	0	7.041	0	1183.13	2.302	3992.44	10091.5	0	0	1527.64	261	1	0044092,0052548,0009892,0030414,0070011,0004867,0031323,0030162,0019222,0004252,0051336,0006807,0110165,0080090,0044267,0009987,0045861,0140096,0044260,0006508,0004175,0016825,0005575,0005615,1901564,0048523,0016787,0098772,0004857,0051171,0051246,0051172,0032268,0051248,0051346,0003824,0050790,0008233,0010605,0008236,0044237,0044238,0010951,0004866,0061135,0008150,0043170,0071704,0050794,0019538…
TRINITY_DN652_c0_g1_i7	myosin-4	0	0	0.067	0	1.677	0	5161.97	1.749	0.013	0	516.548	2401	1
TRINITY_DN652_c0_g1_i5	myosin-4	0	0	0	0.027	0.064	0	2145.49	43.751	0	0	218.933	2401	1
TRINITY_DN652_c0_g1_i14	myosin-4	0	0	0	0.027	0.848	0.027	1940.36	3.711	0.013	0	194.499	2401	1
TRINITY_DN652_c0_g1_i17	myosin-4	0	0	0	0	1.162	0.027	1873.41	27.371	0	0	190.197	2401	1
TRINITY_DN652_c0_g1_i8	myosin-4	0	0	0	0	0.22	0	1515.53	10.21	0.029	0	152.599	2121	1
TRINITY_DN6055_c0_g1_i2	40S ribosomal protein S16	575.412	992.119	692.075	1086.37	680.909	1989.42	2180.46	2032.6	1925.75	2622.51	1477.76	604	1	0016072,0000462,0006364,0044271,0097159,0090304,0043603,0006807,0034470,0044391,0044249,0022627,1990904,0046483,0044267,0016070,0009987,0030490,0003723,0044260,0006139,0005575,1901564,0006396,1901576,1901363,1901360,0043043,0009058,0044237,0044238,0008150,0043170,0032991,0071704,0043604,0009059,0034641,0015935,0006725,0034645,0003735,0003674,0003676,0006518,0005198,0019538,0034660,1901566,0006412
TRINITY_DN3219_c0_g1_i8	40S ribosomal protein S5	552.944	1441.85	674.359	1381.92	560.746	1764.3	1844.65	1903.3	1810.38	2673.49	1460.79	764	1	0097159,0044391,0044249,0022627,1990904,0003729,0009987,0003723,0044260,0005575,1901576,1901363,0044237,0008150,0043170,0071704,0009059,0009058,0015935,0032991,0019843,0034645,0003674,0003676,0006414
TRINITY_DN3219_c0_g1_i6	40S ribosomal protein S5	0.512	9.74	1.979	2.414	0	1.68	0	1.026	1.109	3.977	2.2437	512	1	0097159,0044391,0044249,0022627,1990904,0003729,0009987,0003723,0044260,0005575,1901576,1901363,0044237,0008150,0043170,0071704,0009059,0009058,0015935,0032991,0019843,0034645,0003674,0003676,0006414
TRINITY_DN5589_c0_g1_i5	40S ribosomal protein S30	380.018	805.593	694.173	950.669	461.864	1552.23	1389.33	1344.73	1586.33	2087.3	1125.22	796	1	0044271,0043604,0043603,0006807,0043043,0044391,0044249,0022627,1990904,0044267,0009987,0044260,0005575,1901564,1901566,0071704,0009058,0044237,0044238,0008150,0043170,1901576,0009059,0034641,0015935,0032991,0034645,0003735,0003674,0006518,0005198,0019538,0006412
TRINITY_DN5589_c0_g1_i11	40S ribosomal protein S30	97.399	289.133	240.978	209.606	135.731	302.244	316.402	317.686	504.982	863.844	327.8	486	2	0044271,0043604,0043603,0006807,0043043,0044391,0044249,0022627,1990904,0044267,0009987,0044260,0005575,1901564,1901566,0071704,0009058,0044237,0044238,0008150,0043170,1901576,0009059,0034641,0015935,0032991,0034645,0003735,0003674,0006518,0005198,0019538,0006412
TRINITY_DN5589_c0_g1_i13	40S ribosomal protein S30	0	9.127	2.037	43.081	8.755	20.489	0	9.894	25.007	0	11.839	649	1	0044271,0043604,0043603,0006807,0043043,0044391,0044249,0022627,1990904,0044267,0009987,0044260,0005575,1901564,1901566,0071704,0009058,0044237,0044238,0008150,0043170,1901576,0009059,0034641,0015935,0032991,0034645,0003735,0003674,0006518,0005198,0019538,0006412
TRINITY_DN138_c2_g1_i3	60S ribosomal protein L6	544.525	1178.17	644.242	1330.88	555.269	2219.89	2181.47	1716.1	1627.93	2472.13	1447.06	1240	1	0005840,0044271,0097159,0000027,0043603,0006807,0044260,0043043,0044249,0002181,0016740,0016747,0016746,0044267,0009987,0003723,0110165,0043229,0005575,1901564,1901566,1901576,1901363,0034622,0022618,0003824,0034641,0071840,0044237,0044238,0043933,0008150,0043170,0071704,0043604,0009059,0009058,0034645,0003735,0065003,0071826,0003674,0003676,0043228,0006518,0043226,0005198,0019538,0006414,0043232…
TRINITY_DN4662_c0_g1_i12	Fibrinogen beta chain	0	4.344	0.817	1.722	0.805	4.326	0.285	0.94	4.556	7835.23	785.302	2392	1	0005577,0032991,0030168,0051258,0009987,0005102,0003674,0005515,0001775,0022607,0034622,0043933,0065003,0005575,0016043,0008150,0071840
TRINITY_DN4662_c0_g1_i30	Fibrinogen beta chain	0.644	4.749	0.77	1.536	0.47	4.034	0.92	0.668	3.49	3302	331.928	1948	2	0005577,0032991,0030168,0051258,0009987,0005102,0003674,0005515,0001775,0022607,0034622,0043933,0065003,0005575,0016043,0008150,0071840
TRINITY_DN4662_c0_g1_i4	Fibrinogen beta chain	0.412	4.7	0	1.142	1.856	4.783	1.228	2.022	1.05	1059.56	107.675	1936	2
TRINITY_DN4662_c0_g1_i20	Fibrinogen beta chain	0	0.406	0	0	0	0.223	0	0	0	53.816	5.4445	2489	2	0005577,0032991,0030168,0051258,0009987,0005102,0003674,0005515,0001775,0022607,0034622,0043933,0065003,0005575,0016043,0008150,0071840
TRINITY_DN4662_c0_g1_i32	Fibrinogen beta chain	0	0.667	0.131	0.12	0	0.682	0	0.094	0.422	50.619	5.2735	1086	1
TRINITY_DN4662_c0_g1_i24	Fibrinogen beta chain	0	0	0.198	0.029	0	0.27	0.056	0	0	41.559	4.2112	3002	7	0051258,0065003,0006807,0072378,0030168,0022607,0005102,0072376,0005515,0005575,0005577,1901564,0044238,0043933,0008150,0043170,0071704,0032991,0019538,0003674,0016043,0001775,0034622,0009987,0071840
TRINITY_DN4662_c0_g1_i5	Fibrinogen beta chain	0	0.615	0	0.032	0	0	0.083	0.233	0.042	38.248	3.9253	3241	7	0051258,0065003,0006807,0072378,0030168,0022607,0005102,0072376,0005515,0005575,0005577,1901564,0044238,0043933,0008150,0043170,0071704,0032991,0019538,0003674,0016043,0001775,0034622,0009987,0071840
TRINITY_DN4662_c0_g1_i3	Fibrinogen beta chain	0	0	0.079	0.37	0	0	0	0.12	0.715	35.883	3.7167	1004	2	0005577,0032991,0030168,0051258,0009987,0005102,0003674,0005515,0001775,0022607,0034622,0043933,0065003,0005575,0016043,0008150,0071840
TRINITY_DN4662_c0_g1_i7	Fibrinogen beta chain	0	0	0	0	0	0	0	0	0	24.897	2.4897	2462	2	0005577,0032991,0030168,0051258,0009987,0005102,0003674,0005515,0001775,0022607,0034622,0043933,0065003,0005575,0016043,0008150,0071840
TRINITY_DN4662_c0_g1_i31	Fibrinogen beta chain	0	0.223	0	0	0.278	0	0	0	0.146	23.197	2.3844	3077	7	0051258,0065003,0006807,0072378,0030168,0022607,0005102,0072376,0005515,0005575,0005577,1901564,0044238,0043933,0008150,0043170,0071704,0032991,0019538,0003674,0016043,0001775,0034622,0009987,0071840
TRINITY_DN4662_c0_g1_i6	Fibrinogen beta chain	0	0.293	0	0	0	0.361	0	0.138	0	15.559	1.6351	1017	1	0005577,0032991,0030168,0051258,0009987,0005102,0003674,0005515,0001775,0022607,0034622,0043933,0065003,0005575,0016043,0008150,0071840
TRINITY_DN2857_c0_g1_i14	MHC II antigen-associated invariant chain	4.991	3996.23	496.046	3167.34	221.969	1258.08	389.995	1552.92	3695.47	176.487	1495.95	1753	1	0051234,0051259,0008104,0015833,0070206,0006955,0051641,0065003,0110165,0051649,0042287,0016021,0006886,0009987,0005102,0042289,0005515,0015031,0005575,0046907,0071705,0002376,0051179,0031224,0043933,0033036,0042886,0008150,0045184,0071702,0019882,0003674,0016043,0022607,0071840
TRINITY_DN2857_c0_g1_i6	MHC II antigen-associated invariant chain	0	26.962	1.325	21.408	1.898	8.879	4.717	19.651	37.315	0.583	12.2738	2274	3	0051234,0051259,0008104,0015833,0070206,0006955,0051641,0065003,0110165,0051649,0042287,0016021,0006886,0009987,0005102,0042289,0005515,0015031,0005575,0046907,0071705,0002376,0051179,0031224,0043933,0033036,0042886,0008150,0045184,0071702,0019882,0003674,0016043,0022607,0071840
TRINITY_DN2857_c0_g1_i9	MHC II antigen-associated invariant chain	0	17.714	0.402	13.337	1.218	4.402	4.225	19.479	22.592	1.326	8.4695	1859	1	0051234,0051259,0008104,0015833,0070206,0006955,0051641,0065003,0110165,0051649,0042287,0016021,0006886,0009987,0005102,0042289,0005515,0015031,0005575,0046907,0071705,0002376,0051179,0031224,0043933,0033036,0042886,0008150,0045184,0071702,0019882,0003674,0016043,0022607,0071840
TRINITY_DN2857_c0_g1_i4	MHC II antigen-associated invariant chain	0	24.595	2.321	16.728	0.982	4.743	3.28	12.859	16.894	1.073	8.3475	1986	1	0051234,0051259,0008104,0015833,0070206,0006955,0051641,0065003,0110165,0051649,0042287,0016021,0006886,0009987,0005102,0042289,0005515,0015031,0005575,0046907,0071705,0002376,0051179,0031224,0043933,0033036,0042886,0008150,0045184,0071702,0019882,0003674,0016043,0022607,0071840
TRINITY_DN6182_c1_g2_i8	60S acidic ribosomal protein P0 -like	605.719	1211.23	635.447	1166.26	745.067	2156.59	1986.25	1407.45	1646.58	2587.12	1414.77	1188	1	0043604,0000027,0043603,0006807,0043043,0044249,0002181,0044267,0022607,0044260,1901564,0043933,1901566,0071704,0022618,0009058,0044237,0044238,0065003,0008150,0043170,1901576,0009059,0034641,0034645,0019538,0071826,0044271,0016043,0006518,0034622,0006414,0006412,0009987,0071840
TRINITY_DN6182_c1_g2_i1	60S acidic ribosomal protein P0	6.577	14.784	5.999	7.34	7.139	7.477	29.098	8.912	26.777	18.681	13.2784	1883	5	0005840,0006412,0031224,0043604,0000027,0043603,0006807,0110165,0043043,0044249,0002181,0044267,0022607,0044260,0044085,0006518,0005575,1901564,0043232,1901576,0042254,0009059,0034641,0044237,0044238,0043933,0016021,0008150,0043170,0071704,0022618,0009058,0034645,0019538,0065003,0071826,0044271,0016043,0043228,0043229,0034622,0022613,0006414,1901566,0043226,0009987,0071840
TRINITY_DN6182_c1_g2_i6	60S acidic ribosomal protein P0 -like	0.121	14.307	4.678	10.576	1.661	7.777	4.731	8.116	5.843	8.794	6.6604	1044	3	0071826,0044271,0043604,0008047,0000027,0043603,0043021,0006807,0005515,0043043,0019899,0044249,0002181,0019209,0016740,0044267,0022607,0019207,0140096,0044260,0044877,1901564,1901566,1901576,0098772,0009059,0003824,0034641,0044237,0044238,0043933,0008150,0043170,0071704,0006414,0022618,0009058,0034645,0016772,0019538,0065003,0030234,0003674,0019887,0016043,0006518,0030295,0034622,0016773,0019900…
TRINITY_DN11135_c0_g1_i3	ubiquitin	1042.53	993.704	664.18	408.996	896.34	1290.41	845.931	792.496	520.927	465.5	792.101	964	1	0009056,0044260,0008150,0051603,0005515,0006807,0043412,0031625,0019899,0005737,0044267,0009987,0110165,0006508,0016567,0005575,0005634,0043231,1901564,0006464,0044248,0032446,0043632,0044389,0044237,0044238,0070647,0043170,0071704,1901575,0019538,0009057,0003674,0036211,0043229,0019941,0044265,0043226,0043227
TRINITY_DN11135_c0_g1_i16	ubiquitin 13	230.003	300.769	176.13	147.128	225.088	316.967	218.817	226.078	159.05	93.993	209.402	2742	1	0009056,0090304,0008150,0051603,0031625,0005515,0006807,0006508,0019899,0005737,0043412,0046483,0044267,0016070,0009987,0044260,0006139,0016567,0005575,0000377,0005634,0043231,1901564,0006397,0006464,0044248,1901360,0032446,0000375,0043632,0044389,0044237,0044238,0110165,0008380,0070647,0043170,0000398,0071704,1901575,0006725,0019538,0009057,0003674,0043227,0016071,0036211,0043229,0034641,0019941…
TRINITY_DN11135_c0_g1_i12	ubiquitin	253.549	261.559	215.032	90.611	224.004	360.019	163.768	151.918	140.667	149.062	201.019	787	1	0009056,0044260,0008150,0051603,0005515,0006807,0043412,0031625,0019899,0005737,0044267,0009987,0110165,0006508,0016567,0005575,0005634,0043231,1901564,0006464,0044248,0032446,0043632,0044389,0044237,0044238,0070647,0043170,0071704,1901575,0019538,0009057,0003674,0036211,0043229,0019941,0044265,0043226,0043227
TRINITY_DN11135_c0_g1_i20	polyubiquitin-like	188.305	182.473	119.206	61.434	167.791	241.907	155.456	133.927	94.687	85.842	143.103	916	1	0009056,0044260,0008150,0051603,0005515,0006807,0043412,0031625,0019899,0005737,0044267,0009987,0110165,0006508,0016567,0005575,0005634,0043231,1901564,0006464,0044248,0032446,0043632,0044389,0044237,0044238,0070647,0043170,0071704,1901575,0019538,0009057,0003674,0036211,0043229,0019941,0044265,0043226,0043227
TRINITY_DN11135_c0_g1_i23	ubiquitin 13	46.291	149.794	143.445	104.888	111.972	127.958	118.315	103.966	114.957	87.355	110.894	1845	1	0009056,0090304,0008150,0051603,0031625,0005515,0006807,0006508,0019899,0005737,0043412,0046483,0044267,0016070,0009987,0044260,0006139,0016567,0005575,0000377,0005634,0043231,1901564,0006397,0006464,0044248,1901360,0032446,0000375,0043632,0044389,0044237,0044238,0110165,0008380,0070647,0043170,0000398,0071704,1901575,0006725,0019538,0009057,0003674,0043227,0016071,0036211,0043229,0034641,0019941…
TRINITY_DN11135_c0_g1_i1	ubiquitin	2.854	9.561	7.635	3.595	4.606	6.195	6.197	6.456	4.029	6.552	5.768	1194	1	0009056,0044260,0008150,0051603,0005515,0006807,0043412,0031625,0019899,0005737,0044267,0009987,0110165,0006508,0016567,0005575,0005634,0043231,1901564,0006464,0044248,0032446,0043632,0044389,0044237,0044238,0070647,0043170,0071704,1901575,0019538,0009057,0003674,0036211,0043229,0019941,0044265,0043226,0043227
TRINITY_DN11135_c0_g1_i4	ubiquitin	0	5.108	0.338	1.871	0.515	0.978	0.969	13.596	0.464	1.911	2.575	1602	1	0009056,0044260,0008150,0051603,0005515,0006807,0043412,0031625,0019899,0005737,0044267,0009987,0110165,0006508,0016567,0005575,0005634,0043231,1901564,0006464,0044248,0032446,0043632,0044389,0044237,0044238,0070647,0043170,0071704,1901575,0019538,0009057,0003674,0036211,0043229,0019941,0044265,0043226,0043227
TRINITY_DN133_c0_g1_i18	nascent polypeptide-associated complex subunit alpha, muscle-specific form	247.294	1093.59	1320.25	1038.47	645.472	875.767	996.393	1324.17	1648.76	2499.79	1169	840	1	0012501,0006915,0060548,0009987,0043069,0043066,0008219,0042981,0050794,0010941,0043067,0008150,0048523
TRINITY_DN133_c0_g1_i12	nascent polypeptide-associated complex subunit alpha	318.565	4.823	39.389	16.438	82.94	529.726	35.455	118.219	14.751	11.828	117.213	1554	1
TRINITY_DN133_c0_g1_i19	nascent polypeptide-associated complex subunit alpha	0	0.104	0.088	0	0.812	0.804	611.446	3.212	1.345	0	61.7811	1468	1
TRINITY_DN133_c0_g1_i27	nascent polypeptide-associated complex subunit alpha, muscle-specific form	4.203	18.06	22.136	11.672	14.034	6.287	5.532	18.081	19.517	27.391	14.6913	907	1	0012501,0006915,0060548,0009987,0043069,0043066,0008219,0042981,0050794,0010941,0043067,0008150,0048523
TRINITY_DN133_c0_g1_i11	pollen-specific leucine-rich repeat extensin-like	0.248	2.349	1.133	1.779	4.522	6.696	114.07	5.628	1.886	3.075	14.1386	1146	1
TRINITY_DN133_c0_g1_i10	nascent polypeptide-associated complex subunit alpha-2	0.328	1.699	0.797	0.841	2.343	4.233	123.596	1.855	1.345	1.601	13.8638	1029	1	0005575,0005854,0032991
TRINITY_DN133_c0_g1_i1	nascent polypeptide-associated complex subunit alpha, muscle-specific form	0.741	9.493	6.11	11.814	19.772	18.571	14.169	17.088	11.612	4.973	11.4343	1943	2
TRINITY_DN133_c0_g1_i14	nascent polypeptide-associated complex subunit alpha	41.547	0	0	0	0.267	4.366	0.349	2.613	0	0	4.9142	1621	1
TRINITY_DN133_c0_g1_i7	nascent polypeptide-associated complex subunit alpha	0.137	3.645	2.35	3.638	9.806	5.618	4.313	16.503	2.297	0	4.8307	1786	1
TRINITY_DN7881_c0_g1_i9	slow myosin heavy chain 1	0	0	0	0	3.1	0	11427.5	198.702	0	0	1162.93	574	1	0007010,0031032,0006996,0006807,0043412,0006796,0005737,0016740,0030036,0044267,0009987,0140096,0044260,0006468,0006793,0016310,0005575,1901564,0006464,0005856,0043228,0003824,0018193,0044237,0044238,0110165,0008150,0043170,0071704,0018210,0030029,0016772,0016773,0003674,0016043,0018107,0036211,0043229,0019538,0004674,0016301,0043232,0043226,0004672,0071840
TRINITY_DN7881_c0_g1_i24	slow myosin heavy chain 1	0	0	0	0	0.573	0	70.823	0.662	0	0	7.2058	574	1	0007010,0031032,0006996,0006807,0043412,0006796,0005737,0016740,0030036,0044267,0009987,0140096,0044260,0006468,0006793,0016310,0005575,1901564,0006464,0005856,0043228,0003824,0018193,0044237,0044238,0110165,0008150,0043170,0071704,0018210,0030029,0016772,0016773,0003674,0016043,0018107,0036211,0043229,0019538,0004674,0016301,0043232,0043226,0004672,0071840
TRINITY_DN7881_c0_g1_i5	myosin-13	0	0	0	0	0	0	44.835	1.608	0	0	4.6443	516	1
TRINITY_DN7881_c0_g1_i20	slow myosin heavy chain 1	0	0	0.1	0	5.497	0.236	23.595	0.596	0	0	3.0024	715	1	0007010,0031032,0006996,0006807,0043412,0006796,0005737,0016740,0030036,0044267,0009987,0140096,0044260,0006468,0006793,0016310,0005575,1901564,0006464,0005856,0043228,0003824,0018193,0044237,0044238,0110165,0008150,0043170,0071704,0018210,0030029,0016772,0016773,0003674,0016043,0018107,0036211,0043229,0019538,0004674,0016301,0043232,0043226,0004672,0071840
TRINITY_DN7881_c0_g1_i11	slow myosin heavy chain 1	0	0	0	0	0	0	29.341	0.442	0	0	2.9783	667	1	0007010,0031032,0006996,0006807,0043412,0006796,0005737,0016740,0030036,0044267,0009987,0140096,0044260,0006468,0006793,0016310,0005575,1901564,0006464,0005856,0043228,0003824,0018193,0044237,0044238,0110165,0008150,0043170,0071704,0018210,0030029,0016772,0016773,0003674,0016043,0018107,0036211,0043229,0019538,0004674,0016301,0043232,0043226,0004672,0071840
TRINITY_DN13509_c0_g1_i5	troponin I, skeletal, slow C -related	0	0	0	0	8.029	8814.64	3208.19	47.724	0	0	1207.86	1211	1	0032991,0006936,0006941,0060048,0003008,0005861,0032501,0003009,0005575,0003012,0008150
TRINITY_DN13509_c0_g1_i19	troponin I, skeletal, slow C -related	0	0	0	0	0.255	522.482	174.563	3.293	0	0	70.0593	1265	1	0032991,0006936,0006941,0060048,0003008,0005861,0032501,0003009,0005575,0003012,0008150
TRINITY_DN13509_c0_g1_i21	troponin I, skeletal, slow C -related	0	0	0	0	0.145	175.824	63.988	1.316	0	0	24.1273	731	2	0032991,0006936,0006941,0060048,0003008,0005861,0032501,0003009,0005575,0003012,0008150
TRINITY_DN13509_c0_g1_i9	troponin I, skeletal, slow C -related	0	0	0	0	0	37.506	19.589	0.672	0	0	5.7767	2934	1	0032991,0006936,0006941,0060048,0003008,0005861,0032501,0003009,0005575,0003012,0008150
TRINITY_DN13509_c0_g1_i17	troponin I, skeletal, slow C -related	0	0	0	0	0.148	24.555	13.727	0.56	0	0	3.899	804	1	0032991,0006936,0006941,0060048,0003008,0005861,0032501,0003009,0005575,0003012,0008150
TRINITY_DN13509_c0_g1_i4	troponin I, skeletal, slow C -related	0	0	0	0	0	16.587	15.474	0.169	0	0	3.223	1084	1	0032991,0006936,0006941,0060048,0003008,0005861,0032501,0003009,0005575,0003012,0008150
TRINITY_DN13509_c0_g1_i15	troponin I, skeletal, slow C -related	0	0.08	0	0	0	22.317	7.366	0.22	0	0	2.9983	926	1	0006936,0006941,0060048,0003008,0003009,0032501,0003012,0008150
TRINITY_DN13509_c0_g1_i6	troponin I, skeletal, slow C -related	0	0	0	0	0	17.889	11.784	0.182	0	0	2.9855	1407	2	0032991,0006936,0006941,0060048,0003008,0005861,0032501,0003009,0005575,0003012,0008150
TRINITY_DN50_c0_g1_i30	Hcy-binding domain-containing protein	0	0	0.624	981.72	0.501	1.026	86.448	25.144	0.736	9775.42	1087.16	1462	1	0032259,0008652,0046394,0008168,0009066,0009067,0043167,0043169,0043436,0006807,0009086,0019752,0044249,0016741,0016740,0044281,0044283,0009987,0016053,0006790,1901564,1901566,1901576,0000096,0000097,0006520,0003824,0008172,0044237,0044238,0008150,0071704,0009058,0008270,0003674,0044272,0006082,0006555,0047150,0046872,0046914,1901605,1901607
TRINITY_DN50_c0_g1_i25	Hcy-binding domain-containing protein	0.092	0.084	1.11	13.167	0.873	0.6	783.239	0.723	0.04	42.788	84.2716	1573	1
TRINITY_DN50_c0_g1_i93	Hcy-binding domain-containing protein	0	0	0	4.077	0	0	0	0.33	0.148	74.399	7.8954	1525	3	0032259,0008652,0046394,0008168,0009066,0009067,0043167,0043169,0043436,0006807,0009086,0019752,0044249,0016741,0016740,0044281,0044283,0009987,0016053,0006790,1901564,1901566,1901576,0000096,0000097,0006520,0003824,0008172,0044237,0044238,0008150,0071704,0009058,0008270,0003674,0044272,0006082,0006555,0047150,0046872,0046914,1901605,1901607
TRINITY_DN50_c0_g1_i63	Hcy-binding domain-containing protein	0.067	0.184	0	5.199	0	0	0	0.486	0	65.597	7.1533	1445	2	0032259,0008652,0046394,0008168,0009066,0009067,0043167,0043169,0043436,0006807,0009086,0019752,0044249,0016741,0016740,0044281,0044283,0009987,0016053,0006790,1901564,1901566,1901576,0000096,0000097,0006520,0003824,0008172,0044237,0044238,0008150,0071704,0009058,0008270,0003674,0044272,0006082,0006555,0047150,0046872,0046914,1901605,1901607
TRINITY_DN50_c0_g1_i74	Hcy-binding domain-containing protein	0	0	0	7.241	0	0	0	0.182	0	53.932	6.1355	1486	2	0032259,0008652,0046394,0043169,0009066,0009067,0043167,0008168,0043436,0006807,0009086,0019752,0044249,0016741,0016740,0044281,0044283,0009987,0016053,0006790,1901564,1901566,1901576,0000096,0000097,0006520,0003824,0008172,0044237,0044238,0008150,0071704,0009058,0008270,0003674,0044272,0006082,0006555,0047150,0046872,0046914,1901605,1901607
TRINITY_DN50_c0_g1_i55	betaine--homocysteine S-methyltransferase 1	0	0	0	2.853	0	0	0	0	0	49.025	5.1878	1676	2	0032259,0008652,0046394,0008168,0009066,0009067,0043167,0043169,0043436,0006807,0009086,0019752,0044249,0016741,0016740,0044281,0044283,0009987,0016053,0006790,1901564,1901566,1901576,0000096,0000097,0006520,0003824,0008172,0044237,0044238,0008150,0071704,0009058,0008270,0003674,0044272,0006082,0006555,0047150,0046872,0046914,1901605,1901607
TRINITY_DN50_c0_g1_i109	Hcy-binding domain-containing protein	0	0	0	0.972	0	0	0	0	0	38.398	3.937	2147	3	0032259,0008652,0046394,0008168,0009066,0009067,0043167,0043169,0043436,0006807,0009086,0019752,0044249,0016741,0016740,0044281,0044283,0009987,0016053,0006790,1901564,1901566,1901576,0000096,0000097,0006520,0003824,0008172,0044237,0044238,0008150,0071704,0009058,0008270,0003674,0044272,0006082,0006555,0047150,0046872,0046914,1901605,1901607
TRINITY_DN50_c0_g1_i79	Hcy-binding domain-containing protein	0	0	0	3.673	0	0	0	0	0	21.335	2.5008	1569	1	0032259,0008652,0046394,0008168,0009066,0009067,0043167,0043169,0043436,0006807,0009086,0019752,0044249,0016741,0016740,0044281,0044283,0009987,0016053,0006790,1901564,1901566,1901576,0000096,0000097,0006520,0003824,0008172,0044237,0044238,0008150,0071704,0009058,0008270,0003674,0044272,0006082,0006555,0047150,0046872,0046914,1901605,1901607
TRINITY_DN50_c0_g1_i68	Hcy-binding domain-containing protein	0	0	0	4.682	0	0	0.115	0	0.089	16.36	2.1246	1899	1	0032259,0008652,0046394,0008168,0009066,0009067,0043167,0043169,0043436,0006807,0009086,0019752,0044249,0016741,0016740,0044281,0044283,0009987,0016053,0006790,1901564,1901566,1901576,0000096,0000097,0006520,0003824,0008172,0044237,0044238,0008150,0071704,0009058,0008270,0003674,0044272,0006082,0006555,0047150,0046872,0046914,1901605,1901607
TRINITY_DN3780_c0_g1_i12	ladderlectin-like	0.056	8753.35	0	0	0	0	0	0	0	0	875.34	1320	1
TRINITY_DN3780_c0_g1_i29	ladderlectin-like	0.056	3852.93	0	0	0	0	0	0	0	0	385.299	1325	1
TRINITY_DN3780_c0_g1_i4	ladderlectin-like	0	130.865	0	0	0	0	0	0	0	0	13.0865	374	1
TRINITY_DN3780_c0_g1_i24	ladderlectin-like	0	96.526	0	0	0	0	0	0	0	0	9.6526	2003	1	0038023,0003674
TRINITY_DN3780_c0_g1_i15	ladderlectin-like	0	84.929	0	0	0	0	0	0	0	0	8.4929	1161	1
TRINITY_DN3780_c0_g1_i27	ladderlectin-like	0	83.728	0	0	0	0	0	0	0	0	8.3728	985	1
TRINITY_DN3780_c0_g1_i14	ladderlectin-like	0	77.304	0	0	0	0	0	0	0	0	7.7304	456	1	0038023,0003674
TRINITY_DN3780_c0_g1_i37	TRINITY_DN3780_c0_g1_i37	0	54.64	0.081	0	0	0	0	0.092	0	0	5.4813	815	0
TRINITY_DN3780_c0_g1_i13	ladderlectin-like	0	43.43	0	0	0	0	0	0	0	0	4.343	765	1
TRINITY_DN3780_c0_g1_i18	ladderlectin-like	0	37.149	0	0	0	0	0	0	0	0	3.7149	1674	1	0038023,0003674
TRINITY_DN8696_c2_g1_i4	thymosin beta	37.012	2688.26	1536.63	2509.97	980.167	1025.85	677.133	703.345	2731.54	1013.25	1390.32	1123	1	0051270,0040011,0040012,0110165,0005737,0016477,0009987,0097435,0005515,0003785,0048870,0005575,0043232,0005856,0032879,0030334,2000145,0050794,0003779,0008150,0007015,0003674,0016043,0043228,0043229,0008092,0043226,0071840
TRINITY_DN8696_c2_g1_i1	thymosin beta	0.246	11.982	1.746	3.274	1.456	1.89	0.442	0.407	3.543	3.409	2.8395	2330	1	0051270,0040011,0040012,0005515,0005737,0016477,0009987,0097435,0110165,0003785,0048870,0005575,0032879,0030334,2000145,0050794,0003779,0008150,0007015,0003674,0016043,0008092,0071840
TRINITY_DN6032_c0_g2_i5	60S ribosomal protein L38	867.928	1139.56	803.735	1110.46	581.834	1580.4	1376.33	1170.66	1767.77	2935.3	1333.4	555	1	0005840,0006412,0044271,0043604,0043603,0006807,0110165,0043043,0044249,0044267,0009987,0044260,0043229,0005575,1901564,1901566,1901576,0005198,0022618,0009058,0044237,0044238,0043933,0008150,0043170,0071704,0009059,0034641,0034645,0003735,0065003,0071826,0003674,0016043,0043228,0006518,0034622,0019538,0043232,0043226,0022607,0071840
TRINITY_DN3231_c0_g1_i2	TRINITY_DN3231_c0_g1_i2	0.564	10590.7	0	0	0	0	0	0	0	0	1059.13	354	0
TRINITY_DN3231_c0_g1_i3	TRINITY_DN3231_c0_g1_i3	0.251	2283.84	0	0	0	0	0	0	0	0	228.409	374	0
TRINITY_DN388_c1_g1_i2	apolipoprotein Eb-like	0	7078.78	0	4.256	0.055	0.155	0.075	0	0.097	4556.86	1164.03	1341	1
TRINITY_DN388_c1_g1_i9	apolipoprotein Eb-like	0	288.12	0	0.124	0	0	0	0	0	156.953	44.5197	1987	3	0006066,0008610,0015485,0097159,0019637,0043167,1902653,0043169,0043168,0031210,0042157,0006807,0008203,0008202,0070405,0046486,0044281,0044283,0009987,0006650,0008289,0006796,1902652,0006793,1901617,1901564,1901615,0050997,0097164,1901576,0032934,0046165,1901362,1901360,0006694,0006695,0044255,0043178,0044237,0044238,0008150,0043170,0071704,0009058,0006629,0016126,0016125,0046470,0003674,0005496…
TRINITY_DN388_c1_g1_i5	apolipoprotein Eb-like	0.1	38.495	0	0.241	0	0	0	0	0	31.368	7.0204	3129	2
TRINITY_DN1422_c5_g1_i4	beta-microseminoprotein	0	0.635	0.823	7.555	0.526	0	0	0	0.616	10810.8	1082.1	570	1
TRINITY_DN1422_c5_g1_i13	beta-microseminoprotein-like	0	0	0	0	0	0	0	0.088	0	396.866	39.6954	840	1
TRINITY_DN1422_c5_g1_i26	beta-microseminoprotein	0	0	0	0	0	0	0	0	0	39.157	3.9157	1149	2
TRINITY_DN1422_c5_g1_i27	beta-microseminoprotein	0	0	0	0	0	0	0	0	0	25.307	2.5307	777	1
TRINITY_DN815_c0_g1_i1	Ferritin	167.912	5636.37	379.914	574.073	443.658	352.088	681.332	910.357	3133.56	618.874	1289.81	862	1	0051234,0055065,0050801,0006826,0043167,0043169,0042592,0000041,0005737,0055082,0009987,0110165,0005575,0048878,0098771,0055072,0055076,0055080,0051179,0065008,0006812,0006811,0008150,0006879,0030001,0030003,0006875,0005506,0003674,0006873,0019725,0008199,0046872,0046916,0046914
TRINITY_DN815_c0_g1_i5	Ferritin	0	116.461	2.953	8.864	3.311	9.846	4.881	44.317	31.783	4.145	22.6561	1354	3	0051234,0055065,0043227,0006826,0043167,0043169,0042592,0000041,0110165,0005737,0055082,0009987,0005739,0005575,0043231,0048878,0098771,0055072,0055076,0055080,0051179,0065008,0006812,0006811,0050801,0008150,0006879,0030001,0030003,0006875,0005506,0003674,0006873,0043229,0019725,0008199,0046872,0043226,0046916,0046914
TRINITY_DN815_c0_g1_i6	Ferritin	0	49.77	1.11	1.137	1.187	2.323	0.507	24.232	13.531	0	9.3797	797	2	0051234,0055065,0050801,0006826,0043167,0043169,0042592,0000041,0005737,0055082,0009987,0110165,0005575,0048878,0098771,0055072,0055076,0055080,0051179,0065008,0006812,0006811,0008150,0006879,0030001,0030003,0006875,0005506,0003674,0006873,0019725,0008199,0046872,0005623,0046916,0046914
TRINITY_DN815_c0_g1_i4	TRINITY_DN815_c0_g1_i4	0.321	39.453	2.075	2.323	1.408	0	1.351	16.702	7.958	4.167	7.5758	334	0
TRINITY_DN815_c0_g1_i7	Ferritin	0	17.918	0.34	1.203	0.103	0.084	0.798	8.607	1.883	0.551	3.1487	1887	4	0051234,0055065,0043227,0006826,0043167,0043169,0042592,0000041,0110165,0005737,0055082,0009987,0005739,0005575,0043231,0048878,0098771,0055072,0055076,0055080,0051179,0065008,0006812,0006811,0050801,0008150,0006879,0030001,0030003,0006875,0005506,0003674,0006873,0043229,0019725,0008199,0046872,0043226,0046916,0046914
TRINITY_DN6090_c0_g1_i2	Ribosomal protein S17	490.387	720.757	800.241	955.329	597.523	2596.39	1639.29	967.104	2099	2123.37	1298.94	306	1	0005840,0006412,0044271,0043604,0043603,0006807,0110165,0043043,0044249,0044267,0009987,0044260,0043229,0005575,1901564,0043232,1901576,0009058,0044237,0044238,0008150,0043170,0071704,0009059,0034641,0034645,0003735,0003674,0043228,0006518,0005198,0019538,1901566,0043226
TRINITY_DN7526_c0_g3_i1	Actin family member	735.844	824.554	2242.1	3354.01	1302.32	648.829	521.626	726.968	2601.65	864.12	1382.2	867	1	0005856,0099568,0015629,0005737,0005813,0005615,0005938,0005815,0099738,0043228,0043229,0005575,0110165,0005814,0043226,0043232
TRINITY_DN242_c0_g1_i13	Serotransferrin	12.214	0.093	1.233	0.713	1.351	0.177	0	0.309	1.023	8366.28	838.339	1435	1	0098771,0055072,0050801,0055076,0055065,0055080,0051179,0051234,0003674,0110165,0065008,0043167,0005575,0043169,0042592,0046872,0006811,0005615,0008150,0048878
TRINITY_DN242_c0_g1_i22	Serotransferrin	3.847	0	0.207	0.069	0.113	0.062	0.027	0.16	0.241	2257.67	226.24	3309	3	0098771,0055072,0050801,0055076,0055065,0055080,0051179,0051234,0003674,0110165,0065008,0043167,0005575,0043169,0042592,0046872,0006811,0005615,0008150,0048878
TRINITY_DN242_c0_g1_i29	Serotransferrin	0.116	0.068	0	0	0	0	0	0	0	103.623	10.3807	1053	1	0098771,0055072,0050801,0055076,0055065,0055080,0051179,0051234,0003674,0110165,0065008,0043167,0005575,0043169,0042592,0046872,0006811,0005615,0008150,0048878
TRINITY_DN242_c0_g1_i23	Serotransferrin	0	0	0.066	0	0	0	0	0	0	31.415	3.1481	4935	6	0051234,0051707,0055065,0020027,0065008,0044238,0006826,0043167,0043169,0042592,0006807,0110165,0000041,0044249,0044419,0006811,0009987,0044260,0005575,0005615,1901564,0048878,1901566,0098771,0055072,0055076,0055080,0051179,0042541,0009617,0071704,0044237,0006812,0050801,0008150,0043170,1901576,0009059,0009058,0030001,0034645,0019538,0003674,0043207,0046872
TRINITY_DN242_c0_g1_i19	Serotransferrin	0	0	0	0	0	0	0	0	0	28.244	2.8244	4267	6	0051234,0051707,0055065,0020027,0065008,0044238,0006826,0043167,0043169,0042592,0006807,0110165,0000041,0044249,0044419,0006811,0009987,0044260,0005575,0005615,1901564,0048878,1901566,0098771,0055072,0055076,0055080,0051179,0042541,0009617,0071704,0044237,0006812,0050801,0008150,0043170,1901576,0009059,0009058,0030001,0034645,0019538,0003674,0043207,0046872
TRINITY_DN242_c0_g1_i26	Serotransferrin	0.189	0	0.042	0.034	0	0	0	0	0.022	19.11	1.9397	4297	6	0051234,0051707,0055065,0020027,0065008,0044238,0006826,0043167,0043169,0042592,0006807,0110165,0000041,0044249,0044419,0006811,0009987,0044260,0005575,0005615,1901564,0048878,1901566,0098771,0055072,0055076,0055080,0051179,0042541,0009617,0071704,0044237,0006812,0050801,0008150,0043170,1901576,0009059,0009058,0030001,0034645,0019538,0003674,0043207,0046872
TRINITY_DN242_c0_g1_i25	Serotransferrin	0	0	0	0	0	0	0	0	0	17.295	1.7295	902	2	0098771,0055072,0050801,0055076,0055065,0055080,0051179,0051234,0003674,0110165,0065008,0043167,0005575,0043169,0042592,0046872,0006811,0005615,0008150,0048878
TRINITY_DN937_c0_g3_i6	calcium-transporting ATPase	0	0	0	0	0.699	0	7152.04	3.761	0	0	715.65	1388	1	0051234,0098662,0098660,0033017,0098588,0005789,0050801,0042592,0016020,0055080,0055082,0055085,0055065,0005773,0009987,0070838,0110165,0072507,0072503,0005575,0043231,0048878,0098771,0055074,0051179,0034220,0065008,0031090,0006812,0098655,0006811,0006816,0008150,0030001,0005886,0030003,0006874,0006875,0070588,0006873,0043229,0072511,0019725,0043226,0043227
TRINITY_DN937_c0_g3_i5	calcium-transporting ATPase	0	0.05	0.207	0.058	8.712	0	2379.01	31.314	0	0	241.936	1339	1	0051234,0098662,0098660,0033017,0098588,0005789,0050801,0042592,0016020,0055080,0055082,0055085,0055065,0005773,0009987,0070838,0110165,0072507,0072503,0005575,0043231,0048878,0098771,0055074,0051179,0034220,0065008,0031090,0006812,0098655,0006811,0006816,0008150,0030001,0005886,0030003,0006874,0006875,0070588,0006873,0043229,0072511,0019725,0043226,0043227
TRINITY_DN937_c0_g3_i2	calcium-transporting ATPase	0	0	0.323	0.64	1.377	0	837.292	12.712	0.173	0	85.2517	849	1	0051234,0098662,0098660,0033017,0098588,0005789,0050801,0042592,0016020,0055080,0055082,0055085,0055065,0005773,0009987,0070838,0110165,0072507,0072503,0005575,0043231,0048878,0098771,0055074,0051179,0034220,0065008,0031090,0006812,0098655,0006811,0006816,0008150,0030001,0005886,0030003,0006874,0006875,0070588,0006873,0043229,0072511,0019725,0043226,0043227
TRINITY_DN1679_c6_g1_i20	actin, cytoplasmic 1	1397.81	1421.26	194.646	823.017	195.283	825.901	716.054	4121.41	2837.6	92.054	1262.5	287	1	0051234,0005884,0030554,0097159,0043167,0043168,0097367,1901265,0000166,0005737,0140238,0032559,0010324,0061024,0099080,0009987,0099081,0032553,0099003,0051649,0005575,0016192,0099512,0006996,0008144,1901363,0051179,0048488,0098657,0110165,0008150,0006900,0006897,0005524,0099513,0016050,0003674,0016043,0035639,0032555,0017076,0036094,0071840
TRINITY_DN1679_c6_g1_i13	actin, Indirect flight muscle-like	45.824	37.603	4.862	23.346	5.427	36.107	19.272	105.665	57.949	10.189	34.6244	847	1	0090148,0140014,0061024,0000281,0009987,0016043,0000280,0048285,0006996,0061640,0008150,0071840
TRINITY_DN41446_c1_g1_i1	Proopiomelanocortin-A	0	0.515	13441.5	0	0.227	0	0	0	0	0	1344.23	764	1	0098772,0030546,0030545,0005102,0003674,0005515,0048018,0005179,0005575,0005576,0110165
TRINITY_DN6177_c0_g1_i16	MHC class II antigen	6.572	1892.96	193.759	844.147	67.684	394.424	101.17	444.679	1501.37	54.163	550.093	1060	1	0042611,0032991,0098796,0098797,0019882,0006955,0002376,0005575,0042613,0008150
TRINITY_DN6177_c0_g1_i15	MHC class II antigen	1.598	1236.7	81.112	717.547	37.526	310.063	90.768	361.046	950.069	36.838	382.326	1008	1	0042611,0032991,0098796,0098797,0019882,0006955,0002376,0005575,0042613,0008150
TRINITY_DN6177_c0_g1_i2	MHC class II antigen	1.397	955.821	65.432	350.794	30.194	225.9	46.973	205.676	614.967	23.84	252.099	896	1	0042611,0032991,0098796,0098797,0019882,0006955,0002376,0005575,0042613,0008150
TRINITY_DN6177_c0_g1_i12	MHC class II antigen	0.104	52.909	3.072	50.921	5.725	19.507	8.894	51.906	51.418	1.879	24.6335	1353	2	0042611,0032991,0098796,0098797,0019882,0006955,0002376,0005575,0042613,0008150
TRINITY_DN6177_c0_g1_i5	MHC class II antigen	0	12.334	0.684	9.163	0	2.411	0.47	3.606	6.876	0	3.5544	791	1	0042611,0032991,0098796,0098797,0019882,0006955,0002376,0005575,0042613,0008150
TRINITY_DN1495_c0_g1_i16	Complement component C3	0.907	0	0.092	2.312	0.123	0.074	0.056	0.039	0.033	7566.72	757.035	3252	1	0030414,0002684,0002682,0004866,0006959,0006956,0006955,0110165,0005575,0005615,0098772,0002376,0004857,0002252,0002253,0061134,0061135,0050778,0050776,0008150,0030234,0003674
TRINITY_DN1495_c0_g1_i14	complement component c3a, duplicate 1 -related	0	0	0	0	0	0	0	0	0.225	709.62	70.9845	1142	1	0006959,0002376,0002684,0002682,0002252,0002253,0006956,0050778,0006955,0005575,0050776,0110165,0005615,0008150
TRINITY_DN1495_c0_g1_i15	Complement component C3	0	0	0	0	0	0	0	0	0.033	660.683	66.0716	3281	2	0030414,0002684,0002682,0004866,0006959,0006956,0006955,0110165,0005575,0005615,0098772,0002376,0004857,0002252,0002253,0061134,0061135,0050778,0050776,0008150,0030234,0003674
TRINITY_DN1495_c0_g1_i11	Complement component C3	0.045	0.019	0	0	0	0.031	0	0.025	0.014	608.871	60.9005	6240	2	0030414,0002684,0002682,0004866,0006959,0006956,0006955,0110165,0005575,0005615,0098772,0002376,0004857,0002252,0002253,0061134,0061135,0050778,0050776,0008150,0030234,0003674
TRINITY_DN1495_c0_g1_i7	Complement component C3	0	0	0	0	0	0	0	0	0	232.951	23.2951	6419	3	0030414,0002684,0002682,0004866,0006959,0006956,0006955,0110165,0005575,0005576,0005615,0098772,0002376,0004857,0002252,0002253,0061134,0061135,0050778,0050776,0008150,0030234,0003674
TRINITY_DN1495_c0_g1_i17	Complement component C3	0	0	0.009	0.101	0	0	0	0	0	84.132	8.4242	7004	3	0030414,0002684,0002682,0004866,0006959,0006956,0006955,0110165,0005575,0005615,0098772,0002376,0004857,0002252,0002253,0061134,0061135,0050778,0050776,0008150,0030234,0003674
TRINITY_DN1495_c0_g1_i21	Complement component C3	0	0	0	0	0	0	0	0	0	36.677	3.6677	7183	4	0030414,0002684,0002682,0004866,0006959,0006956,0006955,0110165,0005575,0005576,0005615,0098772,0002376,0004857,0002252,0002253,0061134,0061135,0050778,0050776,0008150,0030234,0003674
TRINITY_DN438_c0_g1_i1	translationally-controlled tumor protein	777.184	787.139	889.715	915.254	430.022	1307.55	1454.57	1361.97	910.763	2148.91	1098.31	1064	1	0005737,0005509,0003674,0110165,0043167,0043169,0005575,0046872
TRINITY_DN438_c0_g1_i10	translationally-controlled tumor protein	1.65	5.607	8.835	4.6	34.397	11.563	16.137	4.51	5.336	5.203	9.7838	1552	1	0005737,0005509,0003674,0110165,0043167,0043169,0005575,0046872
TRINITY_DN1895_c2_g1_i5	Glyceraldehyde-3-phosphate dehydrogenase	0.755	0	0.931	0.155	2.93	5793.05	3819.26	22.319	0	0	963.94	1342	1
TRINITY_DN1895_c2_g1_i14	Glyceraldehyde-3-phosphate dehydrogenase	0	0	0.11	0	0.371	216.283	223.357	1.326	0	0	44.1447	2043	3
TRINITY_DN1895_c2_g1_i17	Glyceraldehyde-3-phosphate dehydrogenase	0.054	0	0.038	0	0.235	94.873	13.858	0	0	0	10.9058	2137	1
TRINITY_DN1895_c2_g1_i21	glyceraldehyde-3-phosphate dehydrogenase	0	0	0.086	0	0	58.603	5.523	0	0	0	6.4212	1215	3	0097159,0008150,0000166,0005996,0044281,0048037,0016491,1901265,0016620,0050662,0051287,0016903,0050661,1901363,0055114,0005975,0003824,0044238,0019318,0071704,0003674,0006006,0036094
TRINITY_DN1895_c2_g1_i35	glyceraldehyde-3-phosphate dehydrogenase	0	0	0	0	0	26.523	2.516	0	0	0	2.9039	570	2	0097159,0008150,0000166,0005996,0044281,0048037,0016491,1901265,0016620,0050662,0051287,0016903,0050661,1901363,0055114,0005975,0003824,0044238,0019318,0071704,0003674,0006006,0036094
TRINITY_DN1895_c2_g1_i33	glyceraldehyde 3-phosphate dehydrogenase	0	0	0	0	0	25.067	1.582	0.116	0	0	2.6765	1440	2
TRINITY_DN1895_c2_g1_i19	glyceraldehyde-3-phosphate dehydrogenase	0	0	0	0	0	23.879	0.594	0	0	0	2.4473	2062	2
TRINITY_DN1895_c2_g1_i37	glyceraldehyde-3-phosphate dehydrogenase	0	0	0	0	0	15.63	3.29	0	0	0	1.892	1798	2
TRINITY_DN1071_c3_g3_i2	tropomyosin 4A -like	0.445	6.671	3.37	3.382	0.553	8194.31	19.232	13.283	5.12	2.752	824.911	1223	1	0051015,0005515,0006936,0099081,0099080,0009987,0097435,0110165,0044877,0005575,0003012,0099513,0099512,0032501,0003779,0008150,0005884,0007015,0003674,0003008,0016043,0008092,0071840
TRINITY_DN1071_c3_g3_i3	tropomyosin alpha-1 chain	2.451	8.323	13.252	8.87	4.628	3.377	1404.12	7.142	33.805	2.003	148.797	3852	3	0051015,0110165,0006936,0099081,0099080,0009987,0097435,0005515,0044877,0005575,0003012,0099513,0099512,0032501,0031224,0003779,0016021,0008150,0005884,0007015,0003674,0003008,0016043,0008092,0071840
TRINITY_DN1071_c3_g3_i6	tropomyosin alpha-1 chain	0.104	0.748	0.237	0.76	0	0.257	498.913	0.21	3.214	0.795	50.5238	1173	1	0051015,0005515,0006936,0099081,0099080,0009987,0097435,0110165,0044877,0005575,0003012,0099513,0099512,0032501,0003779,0008150,0005884,0007015,0003674,0003008,0016043,0008092,0071840
TRINITY_DN1071_c3_g3_i4	tropomyosin 3	15.132	48.016	22.754	79.172	3.738	10.31	7.227	14.587	147.837	10.984	35.9757	1781	1	0051015,0005515,0006936,0099081,0099080,0009987,0097435,0110165,0044877,0005575,0003012,0099513,0099512,0032501,0003779,0008150,0005884,0007015,0003674,0003008,0016043,0008092,0071840
TRINITY_DN12201_c0_g1_i25	protein AMBP	0	0.079	0.165	0.353	0.388	0.197	0	0	0.14	7962.55	796.388	1563	1	0030414,0070011,0004867,0004866,0004252,0006807,0043412,0044267,0009987,0009986,0140096,0044260,0006508,0004175,0016825,0005575,0005576,1901564,0018298,0016787,0098772,0004857,0003824,0061134,0061135,0008236,0044237,0044238,0110165,0016020,0008150,0043170,0071704,0005886,0019538,0030234,0003674,0036211,0008233,0017171,0006464,0005623
TRINITY_DN12201_c0_g1_i34	protein AMBP	0	0.25	0.168	0	1.597	0	0	0.078	0	659.751	66.1844	922	2	0030414,0070011,0004867,0004866,0004252,0006807,0043412,0044267,0009987,0009986,0140096,0044260,0006508,0004175,0016825,0005575,0005576,1901564,0018298,0016787,0098772,0004857,0003824,0061134,0061135,0008236,0044237,0044238,0110165,0016020,0008150,0043170,0071704,0005886,0019538,0030234,0003674,0036211,0008233,0017171,0006464,0005623
TRINITY_DN12201_c0_g1_i43	protein AMBP	0	0	0	0	0	0	0	0	0.138	248.651	24.8789	1859	2	0030414,0070011,0004867,0004866,0004252,0006807,0043412,0044267,0009987,0009986,0140096,0044260,0006508,0004175,0016825,0005575,0005576,1901564,0018298,0016787,0098772,0004857,0003824,0061134,0061135,0008236,0044237,0044238,0110165,0016020,0008150,0043170,0071704,0005886,0019538,0030234,0003674,0036211,0008233,0017171,0006464,0005623
TRINITY_DN12201_c0_g1_i10	protein AMBP	0	0	0	0.265	0.26	0.167	0	0	0	234.602	23.5294	1061	3	0030414,0070011,0004867,0004866,0004252,0006807,0043412,0044267,0009987,0009986,0140096,0044260,0006508,0004175,0016825,0005575,0005576,1901564,0018298,0016787,0098772,0004857,0003824,0061134,0061135,0008236,0044237,0044238,0110165,0016020,0008150,0043170,0071704,0005886,0019538,0030234,0003674,0036211,0008233,0017171,0006464,0005623
TRINITY_DN12201_c0_g1_i22	protein AMBP	0	0	0	0	0	0	0	0	0	52.076	5.2076	1820	2	0030414,0070011,0004867,0004866,0004252,0006807,0043412,0044267,0009987,0009986,0140096,0044260,0006508,0004175,0016825,0005575,0005576,1901564,0018298,0016787,0098772,0004857,0003824,0061134,0061135,0008236,0044237,0044238,0110165,0016020,0008150,0043170,0071704,0005886,0019538,0030234,0003674,0036211,0008233,0017171,0006464,0005623
TRINITY_DN12201_c0_g1_i9	protein AMBP	0	0	0	0	0	0	0	0	0	30.182	3.0182	1633	1	0030414,0070011,0004867,0004866,0004252,0006807,0043412,0044267,0009987,0009986,0140096,0044260,0006508,0004175,0016825,0005575,0005576,1901564,0018298,0016787,0098772,0004857,0003824,0061134,0061135,0008236,0044237,0044238,0110165,0016020,0008150,0043170,0071704,0005886,0019538,0030234,0003674,0036211,0008233,0017171,0006464,0005623
TRINITY_DN12201_c0_g1_i3	protein AMBP	0	0	0	0	0	0	0	0	0.035	22.712	2.2747	2427	5	0030414,0070011,0004867,0004866,0004252,0006807,0043412,0044267,0009987,0009986,0140096,0044260,0006508,0004175,0016825,0005575,0005576,1901564,0018298,0016787,0098772,0004857,0003824,0061134,0061135,0008236,0044237,0044238,0110165,0016020,0008150,0043170,0071704,0005886,0019538,0030234,0003674,0036211,0008233,0017171,0006464,0005623
TRINITY_DN12201_c0_g1_i17	protein AMBP	0	0	0	0	0	0	0	0	0	15.239	1.5239	2087	3	0030414,0070011,0004867,0004866,0004252,0006807,0043412,0044267,0009987,0009986,0140096,0044260,0006508,0004175,0016825,0005575,0005576,1901564,0018298,0016787,0098772,0004857,0003824,0061134,0061135,0008236,0044237,0044238,0110165,0016020,0008150,0043170,0071704,0005886,0019538,0030234,0003674,0036211,0008233,0017171,0006464,0005623
TRINITY_DN12201_c0_g1_i21	protein AMBP	0	0	0	0	0	0	0	0	0	15.174	1.5174	1484	2	0030414,0070011,0004867,0004866,0004252,0006807,0043412,0044267,0009987,0009986,0140096,0044260,0006508,0004175,0016825,0005575,0005576,1901564,0018298,0016787,0098772,0004857,0003824,0061134,0061135,0008236,0044237,0044238,0110165,0016020,0008150,0043170,0071704,0005886,0019538,0030234,0003674,0036211,0008233,0017171,0006464,0005623
TRINITY_DN12201_c0_g1_i33	protein AMBP	0	0	0	0	0	0	0	0	0	14.441	1.4441	1385	2	0030414,0070011,0004867,0004866,0004252,0006807,0043412,0044267,0009987,0009986,0140096,0044260,0006508,0004175,0016825,0005575,0005576,1901564,0018298,0016787,0098772,0004857,0003824,0061134,0061135,0008236,0044237,0044238,0110165,0016020,0008150,0043170,0071704,0005886,0019538,0030234,0003674,0036211,0008233,0017171,0006464,0005623
TRINITY_DN8777_c0_g1_i19	actin, gamma-enteric smooth muscle	0	0	0	0	0	4349.15	48.077	0.459	0	0	439.769	328	1	0005856,0099568,0015629,0099738,0005737,0005813,0005938,0005815,0005814,0043228,0043229,0005575,0110165,0043226,0043232
TRINITY_DN8777_c0_g1_i9	actin, gamma-enteric smooth muscle	4.33	2.34	0.609	4.005	1.296	1367.68	169.472	1.886	2.046	0	155.367	453	1	0005856,0099568,0015629,0099738,0005737,0005813,0005938,0005815,0005814,0043228,0043229,0005575,0110165,0043226,0043232
TRINITY_DN8777_c0_g1_i24	actin, gamma-enteric smooth muscle	0	0	1.755	0	0	1517.26	21.149	1.046	0	0	154.121	372	1	0005856,0099568,0015629,0099738,0005737,0005813,0005938,0005815,0005814,0043228,0043229,0005575,0110165,0043226,0043232
TRINITY_DN8777_c0_g1_i3	actin, gamma-enteric smooth muscle	1.721	0	0.319	0	0	1357.12	88.214	0.674	0	0	144.805	378	1	0005856,0099568,0015629,0099738,0005737,0005813,0005938,0005815,0005814,0043228,0043229,0005575,0110165,0043226,0043232
TRINITY_DN8777_c0_g1_i12	actin, cytoplasmic 1	125.961	102.864	228.921	162.296	146.387	143.024	49.15	48.828	173.4	115.4	129.623	318	1	0048869,0006325,0051234,0043005,0048812,0006900,0040011,0006996,0043044,0110165,0051649,0019899,0005737,0140238,0000785,0010324,0061024,0099080,0009987,0042995,0032989,0005515,0099003,0016050,0048870,0005575,0016192,0099512,0048858,0120039,0007409,0051179,0030424,0048488,0032502,0019901,0098657,0032990,0006338,0008150,0009653,0000790,0005884,0006897,0099513,0003674,0016043,0099081,0030030,0019900…
TRINITY_DN8777_c0_g1_i7	actin, gamma-enteric smooth muscle	11.771	69.149	14.84	20.632	5.003	26.063	8.775	14.869	20.383	5.62	19.7105	232	1	0030554,0097159,0043167,0097367,0043168,0110165,0008144,0005737,0015629,0032559,0032555,0032553,0000166,0005575,0043232,0005856,1901363,1901265,0005813,0005938,0005815,0005814,0099738,0099568,0005524,0003674,0035639,0043228,0043229,0017076,0036094,0043226
TRINITY_DN8777_c0_g1_i25	actin, gamma-enteric smooth muscle	0	0	0	0.23	0	7.606	0.675	0	0	0	0.8511	474	1	0005856,0099568,0015629,0099738,0005737,0005813,0005938,0005815,0005814,0043228,0043229,0005575,0110165,0043226,0043232
TRINITY_DN8777_c0_g1_i14	actin, gamma-enteric smooth muscle	0	0.287	0	0	0	5.074	1.028	0	0	0	0.6389	608	1	0005856,0099568,0015629,0099738,0005737,0005813,0005938,0005815,0005814,0043228,0043229,0005575,0110165,0043226,0043232
TRINITY_DN344_c2_g1_i2	elongation factor 2	576.424	962.234	555.453	548.374	330.615	1161.81	1784.35	1028.95	768.184	2384.43	1010.08	2934	1	0016818,0016817,0043021,0043022,0110165,0044249,1990904,0009987,0044260,0016462,0044877,0005575,0016787,1901576,0003824,0003924,0044237,0008150,0043170,0071704,0009059,0009058,0017111,0032991,0034645,0003674,0006414,0005829
TRINITY_DN154_c5_g3_i1	actin, alpha skeletal muscle	0	0	0	0	0	0	8800.34	60.098	0	0	886.044	293	1	0032432,0005737,0097517,0099081,0099080,0110165,0001725,0005575,0099513,0099512,0043232,0005813,0005938,0005815,0099738,0042641,0005814,0099568,0005884,0043228,0043229,0043226
TRINITY_DN280_c4_g1_i3	Desmin b	0.062	0	0.146	0	0.986	1003.51	5716.42	28.793	0	0	674.992	1544	1	0019932,0007519,0051239,0031032,0019722,0006996,0030018,0007626,0006937,0006936,0099081,0099080,0009987,0045214,0110165,1903522,0003013,0003012,0099513,0099512,0090257,0048856,0009888,0005882,0032502,0032501,0050794,0044057,0005575,0008150,0007165,0060047,0035556,0030029,0003015,0006942,0030036,0007010,0003008,0016043,0055117,0014706,0010882,0008016,0060537,0071840
TRINITY_DN280_c4_g1_i2	Desmin b	0	0	0	0	0	2102.08	6.665	0.442	0	0	210.919	1583	1
TRINITY_DN280_c4_g1_i4	TRINITY_DN280_c4_g1_i4	0	0	0	0	0	223.224	112.535	0.65	0	0	33.6409	560	0
TRINITY_DN280_c4_g1_i1	TRINITY_DN280_c4_g1_i1	0	0	0	0	0	13.404	0.927	0	0	0	1.4331	320	0
TRINITY_DN504_c0_g1_i10	Chitinase, acidic 3	0	8304.17	0.124	0	0	0	0	0	0	0	830.43	1787	1	0006040,0006022,1901071,1901135,0016798,0097367,0006807,0008061,0008144,0005737,0009987,0110165,0005575,0017144,1901564,0016787,0006030,0005975,0003824,0044237,0044238,0008150,0043170,0071704,0003674,0004553,0005576
TRINITY_DN504_c0_g1_i4	Chitin-binding type-2 domain-containing protein	0	608.772	0	0	0	0	0	0	0	0	60.8772	1282	2	0006040,0006022,1901071,1901135,0016798,0097367,0006807,0008061,0008144,0005737,0009987,0110165,0005575,0017144,1901564,0016787,0006030,0005975,0003824,0044237,0044238,0008150,0043170,0071704,0003674,0004553,0005576
TRINITY_DN504_c0_g1_i38	acidic mammalian chitinase-like	0	308.419	0	0	0	0	0	0	0	0	30.8419	1286	2	0005737,0005575,0110165
TRINITY_DN504_c0_g1_i13	acidic mammalian chitinase-like	0	253.218	0	0	0	0	0	0	0	0	25.3218	1972	2	0005737,0005575,0110165
TRINITY_DN504_c0_g1_i39	acidic mammalian chitinase-like	0	206.779	0	0	0	0	0	0	0	0	20.6779	490	1	0005737,0005575,0110165
TRINITY_DN504_c0_g1_i24	oviduct-specific glycoprotein	0	100.587	0	0	0	0	0	0	0	0	10.0587	2661	3	0006040,0006022,1901071,1901135,0016798,0097367,0006807,0008061,0008144,0005737,0009987,0110165,0005575,0017144,1901564,0016787,0006030,0005975,0003824,0044237,0044238,0008150,0043170,0071704,0003674,0004553,0005576
TRINITY_DN504_c0_g1_i15	Chitinase, acidic 3	0	63.721	0	0	0	0	0	0	0	0	6.3721	2288	2	0006040,0006022,1901071,1901135,0016798,0097367,0006807,0008061,0008144,0005737,0009987,0110165,0005575,0017144,1901564,0016787,0006030,0005975,0003824,0044237,0044238,0008150,0043170,0071704,0003674,0004553,0005576
TRINITY_DN504_c0_g1_i11	Chitin-binding type-2 domain-containing protein	0	58.71	0	0	0	0	0	0	0	0	5.871	1885	1	0006040,0006022,1901071,1901135,0016798,0097367,0006807,0008061,0008144,0005737,0009987,0110165,0005575,0017144,1901564,0016787,0006030,0005975,0003824,0044237,0044238,0008150,0043170,0071704,0003674,0004553,0005576
TRINITY_DN1654_c1_g1_i6	elongation factor 1-beta	826.057	807.734	495.569	651.76	300.431	1120.26	1659.11	1419.44	848.673	1877.27	1000.63	819	1	0097159,0005515,0110165,0019899,0044249,0003746,0009987,0003723,0044260,0005575,0005085,1901576,0098772,0051020,1901363,0090079,0044237,0005853,0008150,0043170,0071704,0009059,0009058,0032991,0034645,0008135,0045182,0003674,0003676,0006414,0005829
TRINITY_DN1654_c1_g1_i10	ADP-ribosylation factor-like	5.667	0.66	2.111	0.99	8.058	2.517	9.533	29.536	1.798	3.232	6.4102	1160	1	0051234,0051641,0015031,0097159,0008104,0015833,0043167,0043168,0019001,0097367,1901265,0033036,0000166,0005737,0006886,0032555,0009987,0032550,0001882,0001883,0051649,0005575,0016192,0046907,1901363,0071705,0051179,0036094,0110165,0016020,0042886,0008150,0045184,0005525,0005886,0032549,0032561,0003674,0035639,0017076,0032553,0071702
TRINITY_DN2593_c1_g1_i12	beta-enolase	1.602	19.582	12.348	43.192	48.996	1351.78	6908.2	66.275	24.761	44.89	852.162	1536	1
TRINITY_DN2593_c1_g1_i35	Beta-enolase	0	0.86	0	1.948	1.028	27.001	5.64	0.233	2.836	0	3.9546	666	2	0000287,0043167,1901135,0009056,0019637,0009132,0009259,0009135,0009150,0043169,0043436,0006807,0006165,0046031,0032787,0019752,0072521,0044281,0009179,0046483,0055086,0006090,0006091,0006096,0016052,0009117,0006139,0006796,0006793,0019693,0016310,0005575,0006753,0016829,1901564,0006757,0071704,1901360,0005975,0003824,0000015,1901575,0044237,0044238,0008150,0032991,0009185,0034641,0004634,0006725…
TRINITY_DN2593_c1_g1_i8	gamma-enolase-like	0	0.749	0.256	2.176	0	23.911	6.798	0.207	3.396	1.009	3.8502	892	3	0000287,0043167,1901135,0009056,0019637,0009132,0009259,0009135,0009150,0043169,0043436,0006807,0006165,0046031,0032787,0019752,0072521,0044281,0009179,0046483,0055086,0006090,0006091,0006096,0016052,0009117,0006139,0006796,0006793,0019693,0016310,0005575,0006753,0016829,1901564,0006757,0071704,1901360,0005975,0003824,0000015,1901575,0044237,0044238,0008150,0032991,0009185,0034641,0004634,0006725…
TRINITY_DN2593_c1_g1_i27	gamma-enolase-like	0	1.261	0	1.251	1.498	25.52	5.128	0.828	0	0.78	3.6266	598	2
TRINITY_DN2593_c1_g1_i7	beta-enolase	0	0.256	0	1.512	1.349	25.24	3.271	0.385	1.366	1.337	3.4716	981	1
TRINITY_DN19489_c0_g1_i2	small integral membrane protein 22	0	0	0	0.101	5.786	751.342	6227.76	38.53	0	0	702.351	798	0
TRINITY_DN19489_c0_g1_i1	TRINITY_DN19489_c0_g1_i1	0	0	0.548	0	0	1367.43	26.206	0	0	0	139.418	837	0
TRINITY_DN19489_c0_g1_i3	TRINITY_DN19489_c0_g1_i3	0	0	0	0	0.246	91.724	160.59	1.858	0	0	25.4418	960	0
TRINITY_DN3789_c2_g1_i5	Troponin I	0.076	0	0.268	0	3.533	0	8015.38	25.574	0	0	804.483	760	1	0032991,0006936,0006941,0060048,0003008,0003009,0032501,0005575,0003012,0005861,0008150
TRINITY_DN3789_c2_g1_i26	Troponin I	0	0	0	0	0.046	0	202.731	1.074	0	0	20.3851	1768	1	0032991,0006936,0006941,0060048,0003008,0003009,0032501,0005575,0003012,0005861,0008150
TRINITY_DN3789_c2_g1_i14	TRINITY_DN3789_c2_g1_i14	0	0	0	0	0	0	32.386	1.092	0.221	0	3.3699	460	0
TRINITY_DN3789_c2_g1_i4	Troponin I2, fast skeletal type	0	0	0	0	0.078	0	19.153	0.262	0	0	1.9493	5019	1	0006936,0006941,0060048,0003008,0003009,0032501,0003012,0008150
TRINITY_DN3078_c0_g1_i9	60S ribosomal protein L3	380.937	402.624	212.963	432.058	190.461	539.217	224.775	787.164	401.101	1366.47	493.777	1742	1	0005840,0006412,0044271,0097159,0000027,0043603,0006807,0044260,0043043,0044249,0044267,0022607,0031017,0003723,0110165,0048732,0005575,1901564,0043232,1901576,0006518,1901363,0005198,0048856,0009059,0032502,0009058,0071840,0044237,0044238,0043933,0008150,0043170,0071704,0043604,0022618,0034641,0034645,0003735,0065003,0071826,0003674,0003676,0043228,0043229,0034622,0019538,0048513,1901566,0043226…
TRINITY_DN3078_c0_g1_i15	60S ribosomal protein L3	305.625	455.139	196.473	500.238	227.735	733.729	367.289	439.592	585.967	921.339	473.313	1646	1	0005840,0006412,0044271,0097159,0000027,0043603,0006807,0044260,0043043,0044249,0044267,0022607,0031017,0003723,0110165,0048732,0005575,1901564,0043232,1901576,0006518,1901363,0005198,0048856,0009059,0032502,0009058,0071840,0044237,0044238,0043933,0008150,0043170,0071704,0043604,0022618,0034641,0034645,0003735,0065003,0071826,0003674,0003676,0043228,0043229,0034622,0019538,0048513,1901566,0043226…
TRINITY_DN2298_c0_g1_i42	MGC171851 protein -related	0	8327.12	0	192.938	0	0.274	0.074	0	0	0	852.041	1368	1	0030246,0003674
TRINITY_DN2298_c0_g1_i20	MGC171851 protein -related	0	467.716	0	12.95	0	0	0	0	0	0	48.0666	1579	2	0030246,0003674
TRINITY_DN2298_c0_g1_i45	L-rhamnose-binding lectin CSL2	0.224	125.195	2.124	13.027	3.704	3.763	1.186	0.881	1.065	0.673	15.1842	2069	2	0015075,0005216,0015085,0008324,0022857,0003674,0022803,0015267,0005261,0005262,0022890,0046873,0030246
TRINITY_DN2298_c0_g1_i5	gastrula zinc finger protein XlCGF26 1-like	12.586	9.139	8.208	9.151	13.101	7.878	12.096	8.355	10.378	2.855	9.3747	3513	1	0045893,0045892,0001012,0006366,0090304,1903508,0009987,1903507,1903506,0010556,0010557,0010558,0001067,0018130,1901363,1901362,1901360,0044237,0044238,0006725,0060255,0003690,0045934,0045935,0019438,1902679,0080090,2001141,0006355,0006357,0006351,0005575,0043231,0048522,0048523,0000981,0044212,0008150,1901576,0031328,0043229,0003700,0043226,0043227,0009893,0009892,0009891,0009890,0006807,0110165…
TRINITY_DN2298_c0_g1_i21	L-rhamnose-binding lectin CSL2-like	0	57.98	0	6.746	0	0	0	0	0	0	6.4726	1947	3	0030246,0003674
TRINITY_DN2298_c0_g1_i28	TRINITY_DN2298_c0_g1_i28	0	0	0	0	0	0	17.474	0	0	10.951	2.8425	325	0
TRINITY_DN2298_c0_g1_i37	TRINITY_DN2298_c0_g1_i37	0	0	0	0	0	0	10.951	0	0	2.313	1.3264	281	0
TRINITY_DN2298_c0_g1_i38	L-rhamnose-binding lectin CSL2	0	10.284	0	0	0	0	0	0	0	0	1.0284	2233	2	0030246,0003674
TRINITY_DN7319_c0_g1_i1	TRINITY_DN7319_c0_g1_i1	0	0	0	0	0	0	0	0	0.264	8287.33	828.76	418	0
TRINITY_DN15890_c0_g2_i1	gamma-crystallin M2-like	0	0	8.853	0	10554.2	0	0	0	0	0	1056.3	776	1
TRINITY_DN11528_c0_g1_i4	actin, aortic smooth muscle	0.384	0	0.901	1.118	8.032	0	5324.38	124.039	0.503	0	545.935	309	1	0005856,0099568,0015629,0005737,0005813,0005615,0005938,0005815,0099738,0043228,0043229,0005575,0110165,0005814,0043226,0043232
TRINITY_DN11528_c0_g1_i1	Actin alpha cardiac muscle 1	16.965	9.268	0.593	23.466	9.295	2612.97	301.775	3.934	6.159	0	298.442	554	1	0005856,0099568,0015629,0005737,0005813,0005615,0005938,0005815,0099738,0043228,0043229,0005575,0110165,0005814,0043226,0043232
TRINITY_DN1325_c0_g1_i3	60S ribosomal protein L24	365.512	593.861	467.27	608.135	397.32	1172.09	1485.42	1179.83	943.84	2016.67	922.996	952	1	0097159,0000027,0043933,0003676,0044249,0009987,0003723,0044260,1901576,1901363,0022618,0044237,0065003,0008150,0043170,0071704,0009059,0009058,0034645,0071826,0003674,0016043,0034622,0006414,0022607,0071840
TRINITY_DN1684_c0_g1_i17	60S ribosomal protein L4	472.904	521.369	277.483	423.82	232.077	875.538	812.265	743.581	573.215	1411.67	634.392	1422	2	0097159,0003723,1901363,0003674,0003676
TRINITY_DN1684_c0_g1_i11	Ribos L4 asso C domain-containing protein	84.792	135.734	84.845	160.348	75.325	286.759	183.313	166.197	209.323	303.53	169.017	2339	3	0005840,0006412,0044271,0097159,0043603,0006807,0110165,0043043,0044249,0044267,0009987,0003723,0044260,0043229,0005575,1901564,0043232,0071704,1901363,0009058,0044237,0044238,0008150,0043170,1901576,0043604,0009059,0034641,0034645,0003735,0003674,0003676,0043228,0006518,0005198,0019538,1901566,0043226
TRINITY_DN1684_c0_g1_i18	Ribos L4 asso C domain-containing protein	66.809	91.329	57.558	86.314	43.727	222.829	117.902	101.219	127.238	214.164	112.909	1132	2	0005840,0006412,0044271,0097159,0043603,0006807,0110165,0043043,0044249,0044267,0009987,0003723,0044260,0043229,0005575,1901564,0043232,0071704,1901363,0009058,0044237,0044238,0008150,0043170,1901576,0043604,0009059,0034641,0034645,0003735,0003674,0003676,0043228,0006518,0005198,0019538,1901566,0043226
TRINITY_DN1684_c0_g1_i6	Ribos L4 asso C domain-containing protein	6.694	13.914	8.051	11.376	6.282	34.593	13.449	10.882	15.001	19.619	13.9861	738	2	0005840,0006412,0044271,0097159,0043603,0006807,0110165,0043043,0044249,0044267,0009987,0003723,0044260,0043229,0005575,1901564,0043232,0071704,1901363,0009058,0044237,0044238,0008150,0043170,1901576,0043604,0009059,0034641,0034645,0003735,0003674,0003676,0043228,0006518,0005198,0019538,1901566,0043226
TRINITY_DN588_c1_g1_i1	retinol-binding protein 4	0	0.228	28.142	3.131	5.374	0.116	1.56	2.02	0.442	5272.6	531.361	710	1
TRINITY_DN588_c1_g1_i2	retinol-binding protein 4	0	0	26.25	0.64	0.739	0	0	0	0	2573.34	260.097	751	1
TRINITY_DN588_c1_g1_i3	retinol-binding protein 4	0	0	0	0	0	0	0	0	0	44.588	4.4588	627	1
TRINITY_DN588_c1_g1_i5	retinol-binding protein 4	0	0	0	0	0	0	0	0	0	27.584	2.7584	1625	3	0019840,0008289,0022857,0005501,0003674,0090482,0005319,1901618,0034632,0015665
TRINITY_DN588_c1_g1_i4	retinol-binding protein 4	0	0	0.071	0.084	0.045	0	0	0.04	0	19.851	2.0091	1603	3	0019840,0008289,0022857,0005501,0003674,0090482,0005319,1901618,0034632,0015665
TRINITY_DN139_c2_g5_i4	keratin, type I cytoskeletal 13-like	0	943.052	3.213	3.251	997.462	10.367	996.012	6666.61	0	16.386	963.635	1069	1
TRINITY_DN139_c2_g5_i2	keratin 93 -like	0	13.809	0.056	0.062	24.46	0.156	2.776	8.235	0	0.18	4.9734	1325	1
TRINITY_DN1068_c9_g1_i1	BnaCnng33880D protein	0	0	10606.5	0	0	0	0	0	0	0	1060.65	220	0
TRINITY_DN7995_c0_g1_i3	cytochrome b-c1 complex subunit 8	841.64	367.323	1118.94	405.256	1063.57	2913.67	1711.02	306.049	239.978	221.255	918.871	407	1	0016679,0003674,0008121,0016491,0016681,0003824,0009055
TRINITY_DN7995_c0_g1_i4	cytochrome b-c1 complex subunit 8	13.304	2.443	2.956	2.541	2.035	4.669	0.938	1.345	1.32	0.976	3.2527	671	1	0016679,0003674,0008121,0016491,0016681,0003824,0009055
TRINITY_DN9290_c0_g1_i3	complement component c3a, duplicate 1 -related	0.712	0	0	54.715	4.258	0	0	0.49	1.866	7436.61	749.865	319	1	0006959,0002376,0002684,0002682,0002252,0002253,0006956,0050778,0006955,0005575,0050776,0110165,0005615,0008150
TRINITY_DN9290_c0_g1_i7	TRINITY_DN9290_c0_g1_i7	0	0	0	0	0	0	0	0	0	122.099	12.2099	618	0
TRINITY_DN9290_c0_g1_i4	complement component c3a, duplicate 1 -related	0	0	0	0.647	0	0	0	0	0	77.257	7.7904	804	1	0006959,0002376,0002684,0002682,0002252,0002253,0006956,0050778,0006955,0005575,0050776,0110165,0005615,0008150
TRINITY_DN9290_c0_g1_i1	complement component c3a, duplicate 1 -related	0	0	0	0	0	0	0	0	0	33.478	3.3478	915	2	0030414,0002684,0002682,0004866,0006959,0006956,0006955,0110165,0005575,0005615,0098772,0002376,0004857,0002252,0002253,0061134,0061135,0050778,0050776,0008150,0030234,0003674
TRINITY_DN9290_c0_g1_i8	complement component c3a, duplicate 1 -related	0	0	0	0.515	0	0	0	0	0	23.418	2.3933	320	2	0030414,0002684,0002682,0004866,0006959,0006956,0006955,0110165,0005575,0005615,0098772,0002376,0004857,0002252,0002253,0061134,0061135,0050778,0050776,0008150,0030234,0003674
TRINITY_DN9290_c0_g1_i9	complement component c3a, duplicate 1 -related	0	0	0	0	0	0	0	0	0	0	0	209	1	0006959,0002376,0002684,0002682,0002252,0002253,0006956,0050778,0006955,0005575,0050776,0110165,0005615,0008150
TRINITY_DN2285_c0_g1_i4	brain natriuretic peptide-like	0.328	0	0	0	0	8808.09	0	0	0	0	880.842	595	1	0051427,0005615,0110165,0005737,0009987,0005102,0005515,0048018,0007218,0005575,0005634,0043231,0098772,0030545,0030546,0007186,0050794,0005179,0008150,0007165,0003674,0043229,0043226,0043227
TRINITY_DN2285_c0_g1_i1	brain natriuretic peptide-like	0	0	0.074	0	0	77.283	0	0	0	0	7.7357	873	1	0051427,0005615,0110165,0005737,0009987,0005102,0005515,0048018,0007218,0005575,0005634,0043231,0098772,0030545,0030546,0007186,0050794,0005179,0008150,0007165,0003674,0043229,0043226,0043227
TRINITY_DN2285_c0_g1_i3	brain natriuretic peptide-like	0	0	0.062	0	0	18.216	0	0	0	0	1.8278	1002	2	0051427,0005615,0110165,0005737,0009987,0005102,0005515,0048018,0007218,0005575,0005634,0043231,0098772,0030545,0030546,0007186,0050794,0005179,0008150,0007165,0003674,0043229,0043226,0043227
TRINITY_DN9925_c0_g1_i1	actin, alpha skeletal muscle	11.467	3.002	0	0.464	0	7875.64	743.68	3.5	0	0	863.775	335	1	0032432,0005737,0097517,0099081,0099080,0110165,0001725,0005575,0099513,0099512,0043232,0005813,0005938,0005815,0099738,0042641,0005814,0099568,0005884,0043228,0043229,0043226
TRINITY_DN9925_c0_g1_i2	Actin, alpha 2, smooth muscle, aorta	0	0	0	0	0	14.023	0	0	0	0	1.4023	378	1	0032432,0005737,0097517,0099081,0099080,0110165,0001725,0005575,0099513,0099512,0043232,0005813,0005938,0005815,0099738,0042641,0005814,0099568,0005884,0043228,0043229,0043226
TRINITY_DN2075_c0_g1_i23	Alpha-1-antitrypsin	1.165	2.059	2.22	2.572	0.956	6.181	4.211	2.206	1.613	4705	472.818	1608	1	0052548,0009892,0003674,0044092,0030162,0019222,0004252,0051336,0006807,0044260,0080090,0044267,0009987,0045861,0140096,0110165,0006508,0004175,0031323,0016825,0005575,0005615,1901564,0048523,0016787,0070011,0051171,0051246,0051172,0051248,0051346,0003824,0050790,0008233,0010605,0008236,0044237,0044238,0010951,0008150,0043170,0071704,0050794,0019538,0032268,0052547,0010466,0032269,0017171,0060255…
TRINITY_DN2075_c0_g1_i9	Alpha-1-antitrypsin	0.701	2.163	1.171	1.371	0.105	2.596	2.159	2.074	0.851	2347.23	236.042	1216	1	0052548,0009892,0003674,0044092,0030162,0019222,0004252,0051336,0006807,0044260,0080090,0044267,0009987,0045861,0140096,0110165,0006508,0004175,0031323,0016825,0005575,0005615,1901564,0048523,0016787,0070011,0051171,0051246,0051172,0051248,0051346,0003824,0050790,0008233,0010605,0008236,0044237,0044238,0010951,0008150,0043170,0071704,0050794,0019538,0032268,0052547,0010466,0032269,0017171,0060255…
TRINITY_DN2075_c0_g1_i14	Alpha-1-antitrypsin	0	0	0.032	0	0	0.041	0.14	0.186	0.041	354.175	35.4615	2202	4	0052548,0009892,0003674,0044092,0030162,0019222,0004252,0051336,0006807,0044260,0080090,0044267,0009987,0045861,0140096,0110165,0006508,0004175,0031323,0016825,0005575,0005615,1901564,0048523,0016787,0070011,0051171,0051246,0051172,0051248,0051346,0003824,0050790,0008233,0010605,0008236,0044237,0044238,0010951,0008150,0043170,0071704,0050794,0019538,0032268,0052547,0010466,0032269,0017171,0060255…
TRINITY_DN2075_c0_g1_i19	thyroxine-binding globulin	0	0	0	0	0	0	0	0	0	23.626	2.3626	1707	4	0052548,0009892,0003674,0044092,0030162,0019222,0004252,0051336,0006807,0044260,0080090,0044267,0009987,0045861,0140096,0110165,0006508,0004175,0031323,0016825,0005575,0005615,1901564,0048523,0016787,0070011,0051171,0051246,0051172,0051248,0051346,0003824,0050790,0008233,0010605,0008236,0044237,0044238,0010951,0008150,0043170,0071704,0050794,0019538,0032268,0052547,0010466,0032269,0017171,0060255…
TRINITY_DN2075_c0_g1_i18	thyroxine-binding globulin	0	0.156	0	0	0	0	0	0	0	21.453	2.1609	1021	3	0052548,0009892,0003674,0044092,0030162,0019222,0004252,0051336,0006807,0044260,0080090,0044267,0009987,0045861,0140096,0110165,0006508,0004175,0031323,0016825,0005575,0005615,1901564,0048523,0016787,0070011,0051171,0051246,0051172,0051248,0051346,0003824,0050790,0008233,0010605,0008236,0044237,0044238,0010951,0008150,0043170,0071704,0050794,0019538,0032268,0052547,0010466,0032269,0017171,0060255…
TRINITY_DN2075_c0_g1_i12	thyroxine-binding globulin	0	0	0	0	0	0	0	0	0	18.994	1.8994	1020	1	0052548,0009892,0003674,0044092,0030162,0019222,0004252,0051336,0006807,0044260,0080090,0044267,0009987,0045861,0140096,0110165,0006508,0004175,0031323,0016825,0005575,0005615,1901564,0048523,0016787,0070011,0051171,0051246,0051172,0051248,0051346,0003824,0050790,0008233,0010605,0008236,0044237,0044238,0010951,0008150,0043170,0071704,0050794,0019538,0032268,0052547,0010466,0032269,0017171,0060255…
TRINITY_DN887_c1_g2_i9	Tributyltin binding protein type 1	0.087	0	0	0	0	0	0	0	0.115	5852.35	585.255	1166	1
TRINITY_DN887_c1_g2_i1	Tributyltin binding protein type 1	0.05	0.135	0.29	1.521	0.074	0.415	0	0	1.532	1365.24	136.925	1053	1
TRINITY_DN887_c1_g2_i10	Tributyltin binding protein type 1	0	0	0	0	0	0	0	0	0	93.471	9.3471	1408	3
TRINITY_DN887_c1_g2_i13	Tributyltin binding protein type 1	0	0	0	0.052	0	0	0	0	0	90.346	9.0398	1340	3
TRINITY_DN887_c1_g2_i7	Tributyltin binding protein type 1	0	0	0	0.265	0	0	0	0	1.265	77.311	7.8841	716	1
TRINITY_DN652_c0_g2_i1	MYH7	0	0	0	0	0.455	0	7297.45	6.684	0	0	730.459	342	1	0008092,0050794,0051493,0009987,0003674,0033043,0110165,0071840,0005815,0051128,0005575,0006996,0005515,0008150,0007010,0016043
TRINITY_DN41519_c0_g1_i3	Thymosin beta-4 family member	0	56.828	2.049	1700.47	421.645	2.379	1404.56	5220.1	0.135	0.345	880.851	619	1	0051270,0040011,0040012,0110165,0005737,0016477,0009987,0097435,0005515,0003785,0048870,0005575,0032879,0030334,2000145,0050794,0003779,0008150,0007015,0003674,0016043,0008092,0071840
TRINITY_DN41519_c0_g1_i5	Thymosin beta-4 family member	0	1.122	0	17.201	9.291	0.059	6.583	20.673	0	0	5.4929	1346	1	0051270,0040011,0040012,0110165,0005737,0016477,0009987,0097435,0005515,0003785,0048870,0005575,0032879,0030334,2000145,0050794,0003779,0008150,0007015,0003674,0016043,0008092,0071840
TRINITY_DN326_c1_g1_i5	Prolactin	0.081	0	9616.84	0	0	0	0	0	0	0	961.692	1463	1	0009991,0031667,0097696,0046427,0046425,0110165,1904892,0009987,0005102,1904894,0005515,0048018,0005575,0005615,0007259,0007166,0009967,0009966,0098772,0030545,0030546,0050794,0005179,0008150,0007165,0010646,0010647,0003674,0023051,0048522,0023056
TRINITY_DN326_c1_g1_i1	Prolactin	0.366	0.058	117.555	0	0.321	0.06	0	0	0.282	0	11.8642	1187	1	0009991,0031667,0097696,0046427,0046425,0110165,1904892,0009987,0005102,1904894,0005515,0048018,0005575,0005615,0007259,0007166,0009967,0009966,0098772,0030545,0030546,0050794,0005179,0008150,0007165,0010646,0010647,0003674,0023051,0048522,0023056
TRINITY_DN4088_c0_g1_i2	protein S100-A11-like	0	7.203	1.415	5.611	1374.73	2.619	1925.53	5259.12	0.662	0	857.689	628	1
TRINITY_DN4088_c0_g1_i3	S-100/ICaBP type calcium binding domain containing protein	0	0.436	0	0	9.916	0.065	4.462	22.748	0	0	3.7627	1166	2
TRINITY_DN1980_c1_g1_i10	Eef1db protein	562.763	543.38	152.011	522.341	624.489	1312.38	810.463	484.869	523.193	1575.92	711.18	254	1	0097159,0005515,0110165,0019899,0044249,0003746,0009987,0003723,0044260,0005575,0005085,1901576,0098772,0051020,1901363,0090079,0044237,0005853,0008150,0043170,0071704,0009059,0009058,0032991,0034645,0008135,0045182,0003674,0003676,0006414,0005829
TRINITY_DN1980_c1_g1_i14	Eef1db protein	83.58	76.599	42.098	41.826	49.25	59.908	131.382	108.812	28.192	32.035	65.3682	1168	1	1901576,0071704,0098772,0051020,0003674,0034645,0009987,0009058,0009059,0110165,0005829,0044260,0044249,0005085,0044237,0005575,0006414,0005515,0008150,0043170,0019899
TRINITY_DN1980_c1_g1_i24	Eef1db protein	28.463	31.116	8.764	29.5	37.648	51.903	63.953	30.122	25.236	76.749	38.3454	1910	2	1901576,0071704,0098772,0051020,0003674,0034645,0009987,0009058,0009059,0110165,0005829,0044260,0044249,0005085,0044237,0005575,0006414,0005515,0008150,0043170,0019899
TRINITY_DN1980_c1_g1_i30	E3 ubiquitin/ISG15 ligase TRIM25-like	22.612	16.322	4.01	5.098	7.092	5.198	10.128	23.524	3.808	5.927	10.3719	3291	2	1901576,0071704,0098772,0051020,0003674,0034645,0009987,0009058,0009059,0110165,0005829,0044260,0044249,0005085,0044237,0005575,0006414,0005515,0008150,0043170,0019899
TRINITY_DN4240_c3_g1_i1	TRINITY_DN4240_c3_g1_i1	0	12.523	2.306	0.714	0.732	2.63	1.033	0	1.286	7076.16	709.738	280	0
TRINITY_DN4240_c3_g1_i4	vomeronasal type-1 receptor 52 -like	0	61.988	0.05	0.181	0	0	0.175	0.056	0.226	0.143	6.2819	1186	0
TRINITY_DN140_c0_g1_i9	nuclease-sensitive element-binding protein 1	173.934	658.06	324.927	375.595	426.244	1229.36	1964.92	1229.78	378.757	822.938	758.451	1543	1
TRINITY_DN140_c0_g1_i8	nuclease-sensitive element-binding protein 1	3.56	15.883	9.07	13.684	11.817	29.403	53.153	36.063	9.712	18.929	20.1274	3354	1
TRINITY_DN140_c0_g1_i12	YB3	0.432	20.843	17.079	21.052	38.975	29.667	19.009	15.941	25.099	10.997	19.9094	1368	1	0097159,1901363,0003674,0003676
TRINITY_DN140_c0_g1_i10	YB3	0	10.115	2.037	14.858	2.894	24.546	0.522	5.509	6.587	1.67	6.8738	1411	1	0097159,1901363,0003674,0003676
TRINITY_DN300_c0_g1_i10	Vitelline membrane outer layer protein 1-like	0	0	0	0	0	0	0	0	0	2511.62	251.162	950	1
TRINITY_DN300_c0_g1_i19	Ig-like	0	0	0	0	0.249	0.246	0	0	0	1684.38	168.488	1634	2
TRINITY_DN300_c0_g1_i37	Ig-like	0	0	0	0	0	0	0	0	0	1357.63	135.763	950	1
TRINITY_DN300_c0_g1_i24	vitelline membrane outer layer protein 1 -like	1.341	0.456	0.74	0	0.503	0.463	0.173	0	0.789	552.225	55.669	711	1
TRINITY_DN300_c0_g1_i14	Vitelline membrane outer layer 1 -like	0.336	0.23	0	0.311	0	0	0	0	0	371.078	37.1955	1655	2
TRINITY_DN300_c0_g1_i33	Vitelline membrane outer layer 1 -like	0.07	0.229	0.193	0	0.187	0	0	0.384	0.309	237.759	23.9131	2480	2
TRINITY_DN300_c0_g1_i29	Ig-like	0.434	0.185	0.295	0.229	0	0	0.074	0.084	0	232.725	23.4026	1700	2
TRINITY_DN300_c0_g1_i9	Putative vitelline membrane outer layer protein 1-like	0	0.073	0.155	0	0	0	0	0	0.452	90.834	9.1514	986	1
TRINITY_DN300_c0_g1_i36	Ig-like	0	0.049	0	0.172	0.213	0	0	0	0.462	30.107	3.1003	2740	3
TRINITY_DN300_c0_g1_i7	Putative vitelline membrane outer layer protein 1-like	0	0	0	0	0	0	0	0	0	17.502	1.7502	1241	1
TRINITY_DN300_c0_g1_i16	Ig-like	0	0	0	0	0.087	0	0.291	0.167	0.067	14.874	1.5486	3031	3
TRINITY_DN1430_c0_g2_i2	ATP synthase subunit ATP5MPL, mitochondrial	366.289	305.281	568.6	484.14	606.936	2743.49	2056.52	353.704	281.2	266.233	803.239	355	1	0043226,0110165,0043229,0005575,0005739,0043231,0043227
TRINITY_DN463_c1_g1_i3	alpha-1-acid glycoprotein 1	2.038	32.676	7257.9	47.395	923.158	305.941	280.53	227.989	83.799	1.106	916.253	969	1
TRINITY_DN3578_c0_g1_i1	Alpha 1-globin	1.123	7.395	520.322	626.213	19.437	492.178	45.765	16.51	7413.69	29.247	917.188	696	1	1901363,0048037,0005833,0043177,0003674,0020037,0097159,0019825,0005344,0046906,0043167,0005575,0043169,0036094,0046872,0008144,0032991
TRINITY_DN3578_c0_g1_i3	Alpha 1-globin	0	0.089	4.259	8.285	1.096	11.751	0.69	0.176	68.243	0	9.4589	905	3	1901363,0048037,0005833,0043177,0003674,0020037,0097159,0019825,0005344,0046906,0043167,0005575,0043169,0036094,0046872,0008144,0032991
TRINITY_DN7570_c0_g1_i2	NADH dehydrogenase 1 alpha subcomplex subunit 1	318.48	382.361	962.395	436.522	746.129	3049.54	1220.13	261.059	404.626	289.124	807.037	410	1
TRINITY_DN3390_c0_g1_i2	pineal opsin-like	0	0	0.23	0	8623.14	0.039	0	0	0	0	862.341	1697	1	0009416,0005887,0009314,0009987,0104004,0007186,0110165,0071478,0005623,0031226,0050794,0031224,0005575,0016021,0007165,0008150,0071482
TRINITY_DN3390_c0_g1_i4	pineal opsin-like	0	0	0	0	33.298	0	0	0	0	0	3.3298	1808	2	0031224,0044267,0004888,0006807,0050953,0051606,0009881,0009581,0009583,0043412,0009314,0009987,0044260,0004930,0071482,0005575,0007600,0007601,0007602,0018298,0009416,0007186,0032501,0009582,0031226,0050794,0044237,0044238,0110165,0016021,0008150,0043170,0007165,0071704,0005887,0019538,0104004,0003674,0003008,1901564,0050877,0036211,0038023,0071478,0006464,0005623
TRINITY_DN3390_c0_g1_i3	pineal opsin-like	0	0	0	0	17.26	0	0	0	0	0	1.726	1824	2	0009416,0005887,0009314,0009987,0104004,0007186,0110165,0071478,0005623,0031226,0050794,0031224,0005575,0016021,0007165,0008150,0071482
TRINITY_DN3496_c0_g1_i4	complement factor H-related protein 1-like	0	1.562	0.424	257.771	4.342	0.132	0	0.642	0.378	4838.12	510.337	649	1
TRINITY_DN3496_c0_g1_i12	complement factor H-like	0	0.158	0.167	77.103	1.786	0	0	0	0.153	946.645	102.601	572	1
TRINITY_DN3496_c0_g1_i13	hypothetical protein	0	0	0	20.632	0.479	0	0	0	0	233.726	25.4837	334	1
TRINITY_DN3496_c0_g1_i14	TRINITY_DN3496_c0_g1_i14	0	0	0	7.56	0.275	0	0	0	0.121	121.715	12.9671	668	0
TRINITY_DN3496_c0_g1_i1	complement factor H-like	0	0	0	1.802	1.299	0	0	0	0	107.341	11.0442	372	1
TRINITY_DN3496_c0_g1_i2	TRINITY_DN3496_c0_g1_i2	0	0	0	7.154	0.128	0	0	0	0	85.17	9.2452	762	0
TRINITY_DN3496_c0_g1_i7	TRINITY_DN3496_c0_g1_i7	0	0	0	1.105	0	0	0	0	0	58.015	5.912	552	0
TRINITY_DN3496_c0_g1_i6	complement factor H-like	0	0	0	5.98	0	0	0	0	0	41.69	4.767	747	1
TRINITY_DN3496_c0_g1_i8	Complement factor H	0	0	0	0.296	0.31	0	0	0	0	40.917	4.1523	617	1
TRINITY_DN3889_c0_g2_i5	ATP synthase F 0 complex subunit c1, mitochondrial	431.3	530.923	397.954	475.777	631.404	1790.46	2416.29	497.615	174.22	290.686	763.664	877	1	0015252,0044237,0044238,0046034,0009117,0016887,0009987,0009199,0019693,0018130,1901362,1901360,0034220,0009205,0009201,0022890,0033177,0017111,0032991,0006163,0009165,0006164,1901564,0015399,0022804,0009259,0015075,0015077,0098662,0098660,0015078,0090407,0019637,0019438,0015985,0015986,0022803,0016740,0044281,0072521,0015267,0072522,0005261,0005575,0006753,0006754,1901566,0009260,0008150,1901576…
TRINITY_DN594_c1_g1_i10	troponin C, slow skeletal and cardiac muscle	0	0	4.103	0	6.669	7301.07	200.87	3.497	0.06	0	751.627	1122	1
TRINITY_DN594_c1_g1_i11	Troponin C	0	0	0.42	0	0.72	190.791	4.425	0	0	0	19.6356	1404	3	0043169,0046872,0005509,0003674,0043167
TRINITY_DN594_c1_g1_i4	Troponin C	0	0	0.037	0.052	0	38.76	0.045	0.029	0	0	3.8923	2466	3	0043169,0046872,0005509,0003674,0043167
TRINITY_DN594_c1_g1_i8	troponin C, slow skeletal and cardiac muscle	0	0	0.226	0	0.092	36.453	0.185	0	0	0	3.6956	1839	3	0043169,0046872,0005509,0003674,0043167
TRINITY_DN594_c1_g1_i7	Troponin C type 1a slow	0	0	0	0	0	28.755	0	0	0	0	2.8755	1679	3	0043169,0046872,0005509,0003674,0043167
TRINITY_DN594_c1_g1_i12	Troponin C type 1a slow	0	0	0	0	0.049	19.297	0.236	0	0.043	0	1.9625	1494	1
TRINITY_DN977_c7_g1_i8	Isocitrate dehydrogenase NADP	138.333	17.027	151.801	51.762	129.948	2644.76	3805.38	33.887	26.602	0.8	700.03	1775	1
TRINITY_DN977_c7_g1_i5	Isocitrate dehydrogenase NADP	0.14	5.326	8.232	30.885	5.67	62.903	23.542	2.212	10.039	0	14.8949	666	1	0000287,0006066,0097159,0043169,0072350,0043167,1902652,0043436,0000166,0019752,0006099,0044281,0048037,0009987,0004448,0016491,1901265,1901615,0050662,0071704,1901363,0003824,0044237,0044238,0008150,0051287,0004450,0003674,0006082,0036094,0046872,0016614,0006102,0016616
TRINITY_DN977_c7_g1_i4	TRINITY_DN977_c7_g1_i4	0.053	4.101	4.614	7.487	12.625	0	0.889	4.45	1.247	31.088	6.6554	1006	0
TRINITY_DN977_c7_g1_i7	Isocitrate dehydrogenase NADP	0	0.763	0.706	1.121	0.672	26.384	1.024	0.679	0.446	0	3.1795	2239	2
TRINITY_DN2278_c0_g1_i2	ATP synthase E chain, mitochondrial	181.984	801.536	543.015	475.2	630.167	2613.01	1110.05	267.656	423.33	722.746	776.869	337	1	0015075,0051234,0015077,1901293,0009144,0098660,1901137,0009201,0015078,0046390,0003674,0006812,0072521,0009152,0009150,0015985,0046034,0098662,0006807,0009117,0044249,0034654,0055085,0046483,0055086,0009987,0009199,0008150,0006139,0072522,0006796,0019693,0022890,0005575,0017144,0006754,0018130,1901566,0071704,1901135,1901362,1901360,0019438,0022857,0051179,0098800,0090407,0034220,0000276,0009205…
TRINITY_DN1032_c1_g1_i1	TRINITY_DN1032_c1_g1_i1	0	0	0.305	0	37.008	1.064	6491.12	67.51	0	0	659.701	534	0
TRINITY_DN445_c5_g1_i4	TRINITY_DN445_c5_g1_i4	0.594	1317.05	137.377	297.107	158.715	490.161	298.702	653.364	718.702	157.794	422.956	261	0
TRINITY_DN445_c5_g1_i1	TRINITY_DN445_c5_g1_i1	1.528	1253.97	124.265	338.099	133.564	269.453	266.107	529.241	657.518	110.823	368.457	458	0
TRINITY_DN87_c13_g1_i1	Putative gamma-crystallin M2-like	0.097	3.555	2.384	110.156	8291.37	10.925	1.404	2.08	29.596	0.975	845.254	644	1
TRINITY_DN14686_c0_g1_i8	Cytochrome c oxidase subunit 7C	490.712	516.605	684.443	384.72	612.344	2791.46	1350.09	247.906	274.559	242.948	759.578	588	1	0015075,0015077,0044237,0015078,0009060,0045333,0015980,0009987,0006091,0016491,0110165,0015002,0005575,0055114,0022857,0003824,0019646,0031224,0022890,0016021,0008150,0016676,0006123,0016675,0008324,0003674,0009055,0004129,0022900,0022904
TRINITY_DN14686_c0_g1_i2	Golgi SNAP receptor complex member 1	16.291	10.985	7.348	9.687	9.058	5.398	4.209	8.944	11.56	4.405	8.7885	3641	1	0051234,0098588,0051641,0006996,0110165,0048193,0061024,0005773,0009987,0006888,0016050,0031090,0051649,0005575,0016192,0046907,0051179,0090174,0016020,0031201,0008150,0000139,0006906,0032991,0005886,0098796,0043231,0016043,0043229,0048284,0061025,0043226,0043227,0071840
TRINITY_DN463_c3_g2_i2	TRINITY_DN463_c3_g2_i2	8.034	539.097	963.173	1631.59	1271.09	1363.66	523.394	261.492	764.035	588.112	791.368	1011	0
TRINITY_DN1742_c0_g1_i5	cytochrome c oxidase subunit 4I2	7.052	231.178	118.459	440.438	29.835	3481.48	1940.21	127.089	112.573	569.152	705.747	927	1	0015075,0015077,0015078,0009060,0045333,0015980,0009987,0006091,0016491,0015002,0055114,0022857,0003824,0019646,0044237,0022890,0008150,0016676,0006123,0016675,0008324,0003674,0009055,0004129,0022900,0022904
TRINITY_DN1742_c0_g1_i3	cytochrome c oxidase subunit 4	0.754	5.94	2.705	25.564	1.535	43.116	8.788	22.259	9.771	28.902	14.9334	2031	2	0015075,0015077,0015078,0009060,0045333,0015980,0009987,0006091,0016491,0015002,0055114,0022857,0003824,0019646,0044237,0022890,0008150,0016676,0006123,0016675,0008324,0003674,0009055,0004129,0022900,0022904
TRINITY_DN1923_c2_g1_i3	calcium-transporting ATPase	0.014	0.039	0	0	0.49	0	5320.4	21.154	0	0	534.21	3134	1	0051234,0098662,0098660,0033017,0098588,0005789,0050801,0042592,0016020,0055080,0055082,0055085,0055065,0005773,0009987,0070838,0110165,0072507,0072503,0005575,0043231,0048878,0098771,0055074,0051179,0034220,0065008,0031090,0006812,0098655,0006811,0006816,0008150,0030001,0005886,0030003,0006874,0006875,0070588,0006873,0043229,0072511,0019725,0043226,0043227
TRINITY_DN1923_c2_g1_i2	calcium-transporting ATPase	0.046	0	0.054	0.327	0.774	0	1036.11	6.334	0	0.155	104.379	1110	1	0051234,0098662,0098660,0033017,0098588,0005789,0050801,0042592,0016020,0055080,0055082,0055085,0055065,0005773,0009987,0070838,0110165,0072507,0072503,0005575,0043231,0048878,0098771,0055074,0051179,0034220,0065008,0031090,0006812,0098655,0006811,0006816,0008150,0030001,0005886,0030003,0006874,0006875,0070588,0006873,0043229,0072511,0019725,0043226,0043227
TRINITY_DN1923_c2_g1_i5	sarcoplasmic/endoplasmic reticulum calcium ATPase 3	15.192	5.371	7.473	5.835	1.537	0.823	1.915	11.986	7.961	0.885	5.8978	3343	1	0051234,0098662,0098660,0033017,0098588,0005789,0050801,0042592,0016020,0055080,0055082,0055085,0055065,0005773,0009987,0070838,0110165,0072507,0072503,0005575,0043231,0048878,0098771,0055074,0051179,0034220,0065008,0031090,0006812,0098655,0006811,0006816,0008150,0030001,0005886,0030003,0006874,0006875,0070588,0006873,0043229,0072511,0019725,0043226,0043227
TRINITY_DN1923_c2_g1_i7	sarcoplasmic/endoplasmic reticulum calcium ATPase 3	0	0	13.864	0	0	0	0	0	0	0	1.3864	3377	1	0051234,0098662,0098660,0033017,0098588,0005789,0050801,0042592,0016020,0055080,0055082,0055085,0055065,0005773,0009987,0070838,0110165,0072507,0072503,0005575,0043231,0048878,0098771,0055074,0051179,0034220,0065008,0031090,0006812,0098655,0006811,0006816,0008150,0030001,0005886,0030003,0006874,0006875,0070588,0006873,0043229,0072511,0019725,0043226,0043227
TRINITY_DN11415_c0_g1_i4	60S ribosomal protein L10-like	210.157	366.108	361.016	388.849	243.159	855.539	802.76	635.568	586.803	1038.19	548.815	1882	3	0071826,0005840,0019222,2000112,0043604,0010608,0000027,0043603,0051171,0006807,0044260,0043043,0044391,0031326,0044249,0080090,1990904,0022625,0044267,0022607,0003674,0031323,0110165,0010556,0043229,0034248,0005575,1901564,1901566,1901576,0007420,0051246,0005198,0048856,0006417,0009889,1990403,0010468,0032502,0032268,0034641,0050794,0044237,0044238,0043933,0008150,0043170,0015934,0071704,0022618…
TRINITY_DN11415_c0_g1_i10	60S ribosomal protein L10-like	126.714	138.121	152.948	20.546	81.077	376.094	149.177	189.277	174.9	494.023	190.288	1085	2	0005840,0006412,0044271,0043604,0000027,0043603,0006807,0044260,0043043,0044249,0044267,0009987,0110165,0006518,0005575,1901564,0043232,1901576,0034622,0022618,0009058,0044237,0044238,0043933,0008150,0043170,0071704,0009059,0034641,0034645,0003735,0065003,0071826,0003674,0016043,0043228,0043229,0005198,0019538,1901566,0043226,0022607,0071840
TRINITY_DN11415_c0_g1_i14	60S ribosomal protein L10-like	1.537	8.763	2.908	6.497	2.256	6.311	11.189	11.535	7.378	8.844	6.7218	1572	3	0045892,0043604,0000027,0043603,0010941,0043043,0009987,1903507,1903506,0010556,0010558,0009059,0044237,0044238,0032991,0006518,0034622,0060255,1901566,0005783,0045934,0000122,1902679,0080090,0022625,0060548,2001141,0006355,0006357,0005575,0043231,1901564,0048523,0005790,0010468,0048856,0032502,1990403,0065003,0008150,1901576,0015934,0045182,0003735,0071826,0016043,0031326,0043229,0042981,0048513…
TRINITY_DN63130_c1_g1_i5	heat shock -related 70 kDa protein 2	645.634	1309.52	370.708	507.795	419.528	699.102	395.994	1485.38	590.459	772.405	719.653	2365	1	0051234,0071310,0016817,0010033,0035966,0016818,0031072,0005515,0016020,0016887,0009987,0110165,0005575,0005634,0016192,0016787,0051179,0003824,0006986,0008150,0016462,0017111,0005886,0043231,0003674,0035967,0043229,0034620,0005829,0043226,0043227
TRINITY_DN63130_c1_g1_i13	Si ch211-199o1 2	1.946	40.263	12.599	15.956	11.406	23.023	16.366	67.066	22.253	4.31	21.5188	452	2	0035966,0035967,0010498,0051603,0016887,0045862,0009987,0005515,0043632,1901800,0044237,0044238,0016020,0017111,0016192,0034620,1903052,0006511,1903050,1901565,0031072,0031625,0032270,0031982,0030163,0030162,0006508,0005575,0043231,1901564,0048522,0032268,0060255,0008150,0031331,0045732,1901575,1903364,1903362,0043229,2000060,0043226,0043227,0009896,0051234,0009894,0009893,0043161,0016818,0006807…
TRINITY_DN63130_c1_g1_i25	Heat shock protein 8	0	0.727	18.253	111.901	6.984	6.302	33.336	0	10.892	0	18.8395	940	1	0035966,0009894,0010498,0051603,0032559,0016887,0045862,0032555,0009987,0005515,1901363,0043632,1901800,0044237,0044238,0016020,0017111,0016192,0035967,0034620,1903052,0006511,1903050,1901565,0030554,0097367,0031072,0031625,0032270,0031982,0030163,0030162,0006508,0005575,0043231,1901564,0048522,0032268,0060255,0008150,0031331,0061136,1901575,1903364,1903362,0043229,2000060,0017076,0032553,0043226…
TRINITY_DN63130_c1_g1_i3	Si ch211-199o1 2	0.101	9.543	2.386	2.598	4.818	17.346	4.185	16.322	5.325	2.102	6.4726	2445	2	0051234,0016818,0016817,0010033,0030554,0097159,0035966,0071310,0043167,0043168,0031072,0097367,1901265,0016020,0008144,0032559,0016887,0032555,0009987,0032553,0000166,0005575,0005634,0016192,0005515,0016787,1901363,0051179,0003824,0110165,0006986,0008150,0016462,0017111,0005886,0005524,0043231,0003674,0035967,0035639,0043229,0034620,0017076,0036094,0005829,0043226,0043227
TRINITY_DN63130_c1_g1_i4	heat shock -related 70 kDa protein 2	0.339	11.209	1.393	0.816	2.377	2.422	2.387	15.753	1.397	2.091	4.0184	2438	1	0051234,0016818,0016817,0010033,0030554,0097159,0035966,0071310,0043167,0043168,0031072,0097367,1901265,0016020,0008144,0032559,0016887,0032555,0009987,0032553,0000166,0005575,0005634,0016192,0005515,0016787,1901363,0051179,0003824,0110165,0006986,0008150,0016462,0017111,0005886,0005524,0043231,0003674,0035967,0035639,0043229,0034620,0017076,0036094,0005829,0043226,0043227
TRINITY_DN918_c0_g1_i10	40S ribosomal protein S27	168.098	502.858	618.013	716.409	369.962	1267.24	754.521	736.141	1225.48	1230.71	758.943	2211	3	0015075,0051234,0015077,0098662,0098660,0043005,0003723,0015672,0044237,0015079,0034641,0043604,0006812,0015269,0005267,0043167,0043603,0043169,0006807,0005515,0043043,0044391,0044297,0044249,0016021,0055085,1990904,0110165,0044267,0009987,0003674,0005516,0015267,0044260,0043025,0042995,0022839,0005261,0022890,0005575,0022836,1901564,0005227,0071704,0022627,1901363,0022857,0051179,0046873,0034220…
TRINITY_DN445_c4_g2_i3	ependymin-1-like	0	0	6793.8	0	63.301	0	0	0	0	3.507	686.061	1017	1	0031589,0005509,0007160,0005576,0009987,0003674,0110165,0008150,0043167,0005575,0043169,0007155,0046872,0022610
TRINITY_DN445_c4_g2_i8	ependymin-1-like	0	11.993	1694.46	0	8.631	0	0.141	0	0	0	171.523	822	1	0031589,0005509,0007160,0005576,0009987,0003674,0110165,0008150,0043167,0005575,0043169,0007155,0046872,0022610
TRINITY_DN445_c4_g2_i9	ependymin-1-like	0	0.628	25.013	0	1.119	0	0	0	0	0.254	2.7014	1718	2	0031589,0005509,0007160,0005576,0009987,0003674,0110165,0008150,0043167,0005575,0043169,0007155,0046872,0022610
TRINITY_DN445_c4_g2_i10	ependymin-1-like	0	0.292	13.417	0	0.283	0	0	0	0	0	1.3992	1914	3	0031589,0005509,0007160,0005576,0009987,0003674,0110165,0008150,0043167,0005575,0043169,0007155,0046872,0022610
TRINITY_DN1908_c0_g1_i4	CD59 glycoprotein	0	10.347	2.014	25.513	2.585	2.478	54.906	103.402	202.177	3344.77	374.82	465	1
TRINITY_DN1908_c0_g1_i18	CD59 glycoprotein	0	19.617	0	15.727	2.588	1.187	25.725	39.09	86.314	1705.02	189.526	746	1
TRINITY_DN1908_c0_g1_i51	CD59 glycoprotein	0	1.496	0.492	0.849	0.436	0	1.332	2.661	12.938	384.931	40.5135	1384	1
TRINITY_DN1908_c0_g1_i8	Putative ras-related protein Rab-5C-like	0	0	0	6.528	0.938	0	18.231	40.788	18.796	212.647	29.7928	410	1	0016818,0016817,0097159,0043167,0097367,0019001,0043168,1901265,0000166,0032555,0032550,0001882,0032553,0001883,0016787,1901363,0003824,0003924,0016462,0017111,0032549,0005525,0032561,0003674,0035639,0017076,0036094
TRINITY_DN1908_c0_g1_i14	CD59 glycoprotein	0.047	1.189	0	4.014	0	0.645	3.395	14.244	18.825	141.258	18.3617	1105	1
TRINITY_DN1908_c0_g1_i13	UPAR/Ly6 domain-containing protein	0	0.291	0.312	1.028	0.245	0.087	2.362	3.554	3.051	27.92	3.885	1581	1
TRINITY_DN492_c0_g1_i6	apolipoprotein C-I	0	98.683	15.808	0.346	4.256	0.803	0.252	0.758	0.163	6253.08	637.415	1227	1	0071704,1901564,0019538,0110165,0005576,0044238,0005575,0006807,0042157,0008150,0043170
TRINITY_DN492_c0_g1_i5	Apolipoprotein C-I ApoC-1 family member	0	0.051	0.046	0	0	0	0	0	0	39.661	3.9758	1421	1	0071704,1901564,0019538,0110165,0005576,0044238,0005575,0006807,0042157,0008150,0043170
TRINITY_DN9030_c0_g1_i1	60S ribosomal protein L29	268.004	594.611	430.427	557.543	294.794	773.357	714.198	702.773	971.798	1960.55	726.805	674	1	0005840,0003674,0043604,0043603,0006807,0110165,0043043,0044249,0002181,0044267,0009987,0044260,0043229,0005575,1901564,0043232,0071704,0009058,0044237,0044238,0008150,0043170,1901576,0009059,0034641,0034645,0003735,0044271,0043228,0006518,0043226,0005198,0019538,0006414,1901566,0006412
TRINITY_DN9030_c0_g1_i11	60S ribosomal protein L29	16.03	2.24	0.33	0.299	0.62	1.522	0.41	1.274	0	2.903	2.5628	772	1	0005840,0003674,0043604,0043603,0006807,0110165,0043043,0044249,0002181,0044267,0009987,0044260,0043229,0005575,1901564,0043232,0071704,0009058,0044237,0044238,0008150,0043170,1901576,0009059,0034641,0034645,0003735,0044271,0043228,0006518,0043226,0005198,0019538,0006414,1901566,0006412
TRINITY_DN1675_c0_g1_i47	surfeit locus protein 1	372.764	564.502	332.373	477.309	306.664	853.669	933.231	824.183	778.028	1558.52	700.125	2956	2	0006364,0097159,0090304,0006807,0034470,0046483,0016070,0009987,0016072,0003723,0006139,0000470,0006396,1901363,1901360,0044237,0044238,0008150,0043170,0071704,0034641,0006725,0003674,0003676,0034660
TRINITY_DN784_c2_g1_i1	DUF3421 domain-containing protein	0	6854.02	0	0	0	0.101	0	0	0	0	685.412	1366	1
TRINITY_DN1077_c9_g1_i1	selenoprotein P	6.384	507.046	440.851	1544.06	110.865	446.401	815.82	193.528	372.968	1913.32	635.124	2538	3	0005575,0005615,0110165
TRINITY_DN1077_c9_g1_i4	selenoprotein P	0.177	58.334	4.184	54.597	2.092	22.164	5.471	12.215	11.659	90.493	26.1386	3125	3	0005575,0005615,0110165
TRINITY_DN1077_c9_g1_i6	selenoprotein P	0	36.724	0.62	11.749	0.37	2.028	1.232	0.52	1.894	35.163	9.03	2656	3	0005575,0005615,0110165
TRINITY_DN115_c0_g1_i15	ATP synthase subunit alpha, mitochondrial	135.485	237.404	234.248	183.587	290.133	1057.94	807.667	181.788	100.353	142.457	337.106	1874	1
TRINITY_DN115_c0_g1_i35	ATP synthase subunit alpha, mitochondrial	312.322	82.07	142.039	77.621	331.382	1105.03	1072.55	128.024	52.606	30.912	333.456	2250	1
TRINITY_DN115_c0_g1_i22	ATP synthase subunit alpha, mitochondrial	0	2.867	0	46.958	2.128	19.597	0	0	0	0	7.155	2165	1	0015252,0044237,0044238,0046034,0009117,0032559,0009259,0032555,0009987,0009199,0032553,0019693,0018130,1901363,1901362,1901360,0034220,0033178,0009205,0009201,0022890,0016020,0032991,0006163,0009165,0006164,1901564,0022803,0036094,0015075,0015077,0098662,0043167,0098660,0043531,0015078,0046390,0030554,0019637,0097367,0019438,0015985,0015986,0016740,0044281,0072521,0015267,0072522,0005261,0005575…
TRINITY_DN27363_c0_g1_i1	telethonin	0	0	0.784	0	4.482	1342.38	4637.83	35.988	0	0	602.147	1580	1	0030674,0006936,0006941,0003012,0003674,0003008,0030018,0032501,0060048,0060090,0003009,0005575,0110165,0008150,0005515
TRINITY_DN27363_c0_g1_i2	telethonin	0	0.607	0	0.156	0	14.836	10.394	0.144	0.918	0	2.7055	1709	2	0033292,0030674,0006936,0061024,0006941,0009987,0003012,0003674,0003008,0030018,0016043,0032501,0060048,0060090,0003009,0005515,0005575,0110165,0008150,0071840
TRINITY_DN10755_c1_g1_i1	actin, gamma-enteric smooth muscle	0	0	0.847	0	0	273.035	5503.47	41.277	0	0	581.862	244	1	0005856,0099568,0015629,0099738,0005737,0005813,0005938,0005815,0005814,0043228,0043229,0005575,0110165,0043226,0043232
TRINITY_DN1174_c0_g1_i5	cytochrome c oxidase subunit 7A1	1.095	459.649	23.472	168.13	7.486	2394.72	1693.61	34.094	102.831	462.726	534.781	432	1	0005575,0070469,0005746,0110165
TRINITY_DN1174_c0_g1_i3	cytochrome c oxidase subunit 7A1	0.19	89.444	5.277	40.398	1.018	429.617	284.331	4.917	12.555	76.422	94.4169	479	1	0005575,0070469,0005746,0110165
TRINITY_DN1174_c0_g1_i7	cytochrome c oxidase subunit 7A1	0	5.592	0.169	2.018	0.076	17.471	2.25	0.382	1.197	5.74	3.4895	2031	2	0015075,0015077,0016676,0016675,0008324,0022857,0015078,0003674,0016491,0110165,0003824,0004129,0005575,0009055,0031224,0022890,0015002,0016021,0070469,0005746
TRINITY_DN3847_c2_g3_i2	Cytochrome C oxidase chain VIIB family member	140.195	387.891	608.691	500.038	609.632	2379.32	1335.46	279.037	250.706	204.327	669.53	539	1	0015075,0015077,0016676,0016675,0008324,0022857,0015078,0003674,0016491,0110165,0003824,0004129,0005575,0009055,0031224,0022890,0015002,0016021,0070469,0005746
TRINITY_DN8205_c0_g4_i2	peptidylprolyl isomerase E Cyclophilin E	892.844	879.707	887.61	632.055	459.949	972.703	372.111	395.589	994.272	489.036	697.588	1011	1
TRINITY_DN322_c1_g1_i10	heat shock protein HSP 90-BETA -like	769.143	718.926	519.06	662.009	269.54	431.081	482.265	1047.71	588.264	496.916	598.491	2739	1	0048471,0006457,0005886,0009408,0009987,0009986,0110165,0009266,0005575,0016020,0034605,0008150,0005829
TRINITY_DN322_c1_g1_i6	heat shock protein HSP 90-BETA -like	0	0.566	58.812	4.309	270.785	0	0	3.002	12.395	0.414	35.0283	2893	1	0048471,0006457,0005886,0009408,0009987,0009986,0110165,0009266,0005575,0016020,0034605,0008150,0005829
TRINITY_DN322_c1_g1_i9	heat shock protein HSP 90-BETA -like	139.632	0.042	0.109	0.108	0.085	60.385	42.574	2.004	0.286	0.207	24.5432	2897	1	0009408,0030554,0097159,0043167,0043168,0097367,1901265,0008144,0032559,0032555,0009987,0009986,0110165,0000166,0036094,0005575,0005515,1901363,0009266,0051082,0016020,0008150,0005829,0006457,0005886,0005524,0048471,0003674,0035639,0017076,0032553,0034605
TRINITY_DN322_c1_g1_i11	heat shock protein HSP 90-ALPHA -like	0.852	0.99	12.484	6.829	25.625	11.592	2.96	1.46	5.291	0	6.8083	1892	1	0009408,0030554,0097159,0043167,0043168,0097367,0032553,0043025,0008144,0032559,0032555,0009987,0009986,1901265,0000166,0005575,0005634,0043231,0005515,1901363,0009266,0051082,0110165,0016020,0008150,0006457,0034605,0044297,0005886,0005524,0048471,0003674,0035639,0043229,0043209,0017076,0036094,0005829,0043226,0043227
TRINITY_DN322_c1_g1_i12	heat shock protein HSP 90-BETA -like	0.898	5.253	1.566	2.741	3.279	11.948	11.87	19.263	5.276	0.286	6.238	3270	2	0009408,0030554,0097159,0043167,0043168,0097367,1901265,0008144,0032559,0032555,0009987,0009986,0110165,0000166,0036094,0005575,0005515,1901363,0009266,0051082,0016020,0008150,0005829,0006457,0005886,0005524,0048471,0003674,0035639,0017076,0032553,0034605
TRINITY_DN322_c1_g1_i4	heat shock protein HSP 90-BETA -like	5.522	0	0	0	0.164	17.48	2.288	0	0	0	2.5454	2628	1	0048471,0006457,0005886,0009408,0009987,0009986,0110165,0009266,0005575,0016020,0034605,0008150,0005829
TRINITY_DN4536_c0_g1_i2	ATP synthase membrane subunit DAPIT	252.025	223.044	648.778	306.565	617.971	2270.35	1438.54	326.466	188.606	117.895	639.024	410	1	0005753,0032991,0098796,0016469,0098800,0110165,0045259,0031224,0005575,0016021
TRINITY_DN1334_c0_g1_i8	40S ribosomal protein S18 -like	195.759	322.495	265.442	370.67	202.119	466.751	627.972	556.061	550.721	759.252	431.724	1668	1	0015935,0032991,0110165,0005575,0005829,0044391,1990904
TRINITY_DN1334_c0_g1_i3	40S ribosomal protein S18 -like	139.554	193.063	174.996	126.875	113.961	227.443	140.317	128.435	323.641	503.941	207.223	1781	1	0006412,0044271,0097159,0043603,0006807,0044260,0043043,0044391,0044249,0022627,1990904,0044267,0009987,0003723,0099572,0006518,0005575,0005634,0043231,1901564,1901566,1901576,1901363,0009058,0044237,0044238,0110165,0008150,0043170,0071704,0043604,0009059,0034641,0015935,0032991,0034645,0003735,0003674,0003676,0043229,0014069,0005198,0019538,0043226,0043227
TRINITY_DN2704_c1_g1_i1	cytochrome b-c1 complex subunit 7	241.132	275.608	423.72	275.901	443.617	2435.82	1582.02	206.792	192.647	135.596	621.285	473	1	0033108,0070069,0009060,1902494,0045333,0045275,0043933,0015980,0005750,0009987,0006091,0017062,0005575,0034551,1990204,0055114,0098803,0098800,0044237,0065003,0008150,0006122,0032991,0098796,0016043,0034622,0022900,0017004,0022607,0022904,0071840
TRINITY_DN2704_c1_g1_i4	cytochrome b-c1 complex subunit 7	0	3.031	2.224	3.206	6.949	21.585	5.809	1.486	0.675	2.692	4.7657	419	1	0033108,0070069,0009060,1902494,0045333,0045275,0043933,0015980,0005750,0009987,0006091,0017062,0005575,0034551,1990204,0055114,0098803,0098800,0044237,0065003,0008150,0006122,0032991,0098796,0016043,0034622,0022900,0017004,0022607,0022904,0071840
TRINITY_DN506_c0_g1_i2	cytochrome c oxidase subunit 6A, mitochondrial-like	3.025	572.85	17.915	293.687	15.29	2292.53	1127.43	125.588	171.367	578.501	519.818	792	1	0015075,0015077,0015078,0070069,0009060,0045277,0045333,0015980,0005751,0009987,0006091,0016491,0015002,0005575,0098772,0055114,0022857,0098803,0098800,0003824,0019646,0044237,0022890,0008150,0016676,0006123,0016675,0098796,0008324,0030234,0003674,0009055,0004129,0022900,0022904,0032991
TRINITY_DN506_c0_g1_i5	cytochrome c oxidase subunit 6A, mitochondrial-like	1.446	162.63	5.579	126.442	12.907	176.959	38.24	80.47	120.191	154.185	87.9049	1105	1	0015075,0015077,0015078,0070069,0009060,0045277,0045333,0015980,0005751,0009987,0006091,0016491,0015002,0005575,0098772,0055114,0022857,0098803,0098800,0003824,0019646,0044237,0022890,0008150,0016676,0006123,0016675,0098796,0008324,0030234,0003674,0009055,0004129,0022900,0022904,0032991
TRINITY_DN506_c0_g1_i4	cytochrome c oxidase subunit 6a, mitochondrial	0	9.909	0.1	3.755	0.124	15.256	1.863	1.152	2.519	6.646	4.1324	1506	1	0015075,0015077,0015078,0009060,0045333,0015980,0009987,0006091,0016491,0015002,0098772,0055114,0022857,0003824,0019646,0044237,0022890,0008150,0016676,0006123,0016675,0008324,0030234,0003674,0009055,0004129,0022900,0022904
TRINITY_DN1468_c0_g1_i10	Iron-sulfur cluster assembly enzyme b	51.436	109.308	511.159	112.376	1176.7	707.551	405.273	39.147	201.536	60.724	337.521	969	1	0051188,0055065,0051186,0051540,0031974,0046916,0043167,0043169,0042592,0006873,0044249,0055080,0055082,0048037,0005759,0022607,0110165,0006790,0005575,0051536,0043233,0070013,0098771,0055072,0055076,0065008,0031163,0044237,0050801,0008150,0009058,0006879,0030003,0006875,0005506,0003674,0016043,0048878,0019725,0046872,0046914,0009987,0016226,0071840
TRINITY_DN1468_c0_g1_i16	Iron-sulfur cluster assembly enzyme b	58.621	94.62	484.855	97.535	1363.05	611.563	283.187	55.352	183.963	60.805	329.355	1034	1	0051188,0055065,0051186,0051540,0031974,0046916,0043167,0043169,0042592,0006873,0044249,0055080,0055082,0048037,0005759,0022607,0110165,0006790,0005575,0051536,0043233,0070013,0098771,0055072,0055076,0065008,0031163,0044237,0050801,0008150,0009058,0006879,0030003,0006875,0005506,0003674,0016043,0048878,0019725,0046872,0046914,0009987,0016226,0071840
TRINITY_DN14276_c0_g1_i1	TRINITY_DN14276_c0_g1_i1	0.153	1.654	70.151	11.234	9.833	0	4.782	4.147	1.605	5369.15	547.271	486	0
TRINITY_DN2091_c0_g1_i10	prosaposin	251.91	854.364	405.411	857.121	176.158	440.208	233.213	323.675	1133.47	249.394	492.493	1610	2
TRINITY_DN2091_c0_g1_i4	Prosaposin	81.729	206.574	80.54	67.962	32.922	80.673	34.042	60.792	185.025	113.413	94.3672	3760	3	0048869,0060736,0016791,0042578,0007193,0043226,0019216,0019222,0006807,0080090,0030855,0005773,0009987,0140096,0110165,0060742,0005575,0005615,1901564,0016787,0003006,0007188,0048589,0032501,0007187,0007186,0016788,0003824,0032502,0030154,0044255,0050794,0031224,0044238,0016021,0008150,0071704,0006665,0043231,0006629,0044237,0007165,0003674,0035265,0043229,0000323,0005764,0022414,0004725,0006643…
TRINITY_DN2091_c0_g1_i7	prosaposin	157.599	94.267	74.136	18.769	51.707	66.163	48.066	35.416	63.482	81.229	69.0834	1762	1
TRINITY_DN1458_c0_g1_i8	Prostaglandin D synthase	0.115	0	4647.22	0.244	88.431	0	0	0.153	0.076	1778.45	651.469	936	1	0036094,0003674
TRINITY_DN1458_c0_g1_i10	Prostaglandin D synthase	0	0	4.621	0	0.36	0	0	0	0	19.667	2.4648	1492	4	0036094,0003674
TRINITY_DN3863_c0_g1_i3	tubulin beta chain	1074.4	225.343	1935.9	244.365	757.604	340.928	269.076	299.594	241.555	64.375	545.314	1277	1	0140014,0003674,0097159,0043167,0006996,0019001,0043168,0001883,0000226,0000166,0005737,0099081,0032555,0009987,0032550,0001882,1901265,0005575,0097367,0099512,1901363,0005874,0032553,0110165,0008150,0005525,0032549,0032561,0099513,0007017,0007010,0016043,0035639,0048285,0099080,0017076,0036094,0000280,0071840
TRINITY_DN3863_c0_g1_i16	tubulin beta-2A chain-like	0	0	474.957	0	116.518	0	0	0.605	0	0	59.208	612	1	0140014,0003674,0097159,0043167,0097367,0019001,0006996,0001883,0000226,0000166,0005737,0099081,0099080,0009987,0032550,0001882,1901265,0005575,0099513,0099512,1901363,0005874,0043168,0032553,0110165,0008150,0005525,0032549,0032561,0007017,0007010,0016043,0035639,0048285,0032555,0017076,0036094,0000280,0071840
TRINITY_DN3863_c0_g1_i11	tubulin beta chain	12.983	22.353	132.948	26.856	61.224	34.449	16.897	26.499	31.695	10.804	37.6708	1169	1	0140014,0003674,0097159,0043167,0006996,0019001,0043168,0001883,0000226,0000166,0005737,0099081,0032555,0009987,0032550,0001882,1901265,0005575,0097367,0099512,1901363,0005874,0032553,0110165,0008150,0005525,0032549,0032561,0099513,0007017,0007010,0016043,0035639,0048285,0099080,0017076,0036094,0000280,0071840
TRINITY_DN3863_c0_g1_i8	tubulin beta chain	4.557	0.344	58.009	9.426	96.611	7.857	10.276	3.474	4.146	0.09	19.479	1762	1	0140014,0003674,0097159,0043167,0006996,0019001,0043168,0001883,0000226,0000166,0005737,0099081,0032555,0009987,0032550,0001882,1901265,0005575,0097367,0099512,1901363,0005874,0032553,0110165,0008150,0005525,0032549,0032561,0099513,0007017,0007010,0016043,0035639,0048285,0099080,0017076,0036094,0000280,0071840
TRINITY_DN3863_c0_g1_i19	tubulin beta-5 chain	4.641	4.148	1.785	1.647	46.498	0.502	15.383	0.193	2.294	1.457	7.8548	788	1	0140014,0003674,0097159,0043167,0097367,0019001,0006996,0001883,0000226,0000166,0005737,0099081,0099080,0009987,0032550,0001882,1901265,0005575,0099513,0099512,1901363,0005874,0043168,0032553,0110165,0008150,0005525,0032549,0032561,0007017,0007010,0016043,0035639,0048285,0032555,0017076,0036094,0000280,0071840
TRINITY_DN3863_c0_g1_i23	tubulin beta chain	2.096	1.427	6.532	2.971	4.606	16.012	13.775	2.434	3.155	0.701	5.3709	3963	2	0031968,0032549,0097193,0140014,0098588,0007010,0097159,0006974,0043066,0046983,0097190,0043167,0043168,0019001,0097367,0010941,1901265,0008630,0000226,0000166,0005737,0035639,0099081,0099080,0009987,0032550,0001882,0001883,0031090,0005575,0007165,0099512,0005515,0006996,1901363,0005874,0031966,0017076,0032553,0050794,0110165,0016020,0008150,0005741,0035556,0005525,0042803,0042802,0032561,0099513…
TRINITY_DN3863_c0_g1_i18	tubulin beta chain	15.215	0.395	4.457	0.547	2.001	0.746	1.909	3.91	0.475	0.514	3.0169	757	1	0140014,0003674,0097159,0043167,0006996,0019001,0043168,0001883,0000226,0000166,0005737,0099081,0032555,0009987,0032550,0001882,1901265,0005575,0097367,0099512,1901363,0005874,0032553,0110165,0008150,0005525,0032549,0032561,0099513,0007017,0007010,0016043,0035639,0048285,0099080,0017076,0036094,0000280,0071840
TRINITY_DN1970_c0_g1_i1	ATPase inhibitor, mitochondrial	68.375	391.866	577.124	319.304	322.122	2368.07	1143.05	270.283	282.23	175.074	591.749	704	1	0051336,0051188,0042559,0060590,0046394,0051186,0043462,0003674,0043604,0043603,0019438,0032780,0006807,0005739,0019752,0044249,0006732,0044281,0046483,0033014,0042440,0009987,0042558,0016053,0110165,0009396,0006779,0006778,0043436,0005575,0043231,1901564,0018130,1901566,0042030,1901576,0098772,1901362,1901360,0042168,0004857,0051346,0060589,0050790,0034641,0046148,0009108,0044237,0008150,0044283…
TRINITY_DN1970_c0_g1_i2	ATPase inhibitor A, mitochondrial-like	2.282	19.223	21.696	15.452	12.535	78.364	31.381	10.659	15.089	9.248	21.5929	1554	2	0051188,0042559,0042558,0046394,0051186,0043604,0006082,0043603,0019438,0043436,0006807,0005739,0019752,0044249,0006732,0044281,0046483,0009987,0016053,0110165,0009396,0006779,0006778,0005575,0043231,0042440,0018130,1901566,1901576,0033014,1901362,1901360,0042168,0009058,0046148,0009108,0044237,0008150,0006725,0071704,0006760,0034641,0044283,0042398,0044271,1901564,0006783,0043229,0006575,0033013…
TRINITY_DN6457_c0_g1_i1	TRINITY_DN6457_c0_g1_i1	15.612	2716.23	234.354	721.737	85.529	315.058	168.607	520.752	1197.03	309.457	628.437	267	0
TRINITY_DN2998_c0_g1_i4	plasma protease C1 inhibitor	0	0.338	0	0	0	0.063	0	0.095	0	4259.55	426.005	2063	1	0052548,0009892,0003674,0044092,0030162,0019222,0004252,0051336,0006807,0044260,0080090,0044267,0009987,0045861,0140096,0110165,0006508,0004175,0031323,0016825,0005575,0005615,1901564,0048523,0016787,0070011,0051171,0051246,0051172,0051248,0051346,0003824,0050790,0008233,0010605,0008236,0044237,0044238,0010951,0008150,0043170,0071704,0050794,0019538,0032268,0052547,0010466,0032269,0017171,0060255…
TRINITY_DN2998_c0_g1_i2	Ig-like	0	0	0.106	0.467	0	0	0.124	0.23	0.12	560.163	56.121	1586	1	0044092,0052548,0009892,0003674,0030414,0002683,0002682,0004867,0051239,0070011,0030162,0050818,0019222,0004252,0051336,0006807,0061041,0002920,0017171,0050777,0080090,0050878,0044267,0009987,0045861,0051171,0031323,0044260,0006508,0004175,0110165,0016825,0004866,0005575,0005615,0140096,0048523,0016787,0098772,0004857,0002698,0051246,0002921,0051172,0032268,0002697,0051346,0003824,0065008,0008233…
TRINITY_DN2998_c0_g1_i8	plasma protease C1 inhibitor	0	0	0	0	0	0	0	0	0	297.464	29.7464	2218	2	0044092,0052548,0009892,0003674,0030414,0002683,0002682,0004867,0051239,0070011,0030162,0050818,0019222,0004252,0051336,0006807,0061041,0002920,0017171,0050777,0080090,0050878,0044267,0009987,0045861,0051171,0031323,0044260,0006508,0004175,0110165,0016825,0004866,0005575,0005615,0140096,0048523,0016787,0098772,0004857,0002698,0051246,0002921,0051172,0032268,0002697,0051346,0003824,0065008,0008233…
TRINITY_DN2998_c0_g1_i9	plasma protease C1 inhibitor	0	0	0	0	0.091	0	0	0	0	95.942	9.6033	2276	2	0052548,0009892,0003674,0044092,0030162,0019222,0004252,0051336,0006807,0044260,0080090,0044267,0009987,0045861,0140096,0110165,0006508,0004175,0031323,0016825,0005575,0005615,1901564,0048523,0016787,0070011,0051171,0051246,0051172,0051248,0051346,0003824,0050790,0008233,0010605,0008236,0044237,0044238,0010951,0008150,0043170,0071704,0050794,0019538,0032268,0052547,0010466,0032269,0017171,0060255…
TRINITY_DN2998_c0_g1_i6	C1INH	0	0	0	0	0	0	0	0	0	46.613	4.6613	706	1	0044092,0052548,0009892,0003674,0030414,0002683,0002682,0004867,0051239,0070011,0030162,0050818,0019222,0004252,0051336,0006807,0061041,0002920,0017171,0050777,0080090,0050878,0044267,0009987,0045861,0051171,0031323,0044260,0006508,0004175,0110165,0016825,0004866,0005575,0005615,0140096,0048523,0016787,0098772,0004857,0002698,0051246,0002921,0051172,0032268,0002697,0051346,0003824,0065008,0008233…
TRINITY_DN2998_c0_g1_i10	plasma protease C1 inhibitor	0	0	0	0	0	0	0	0	0	20.088	2.0088	2155	1	0052548,0009892,0050808,0044092,0031323,0019222,0004252,0051336,0034330,0044260,0006807,0080090,0044267,0009987,0045861,0030162,0110165,0006508,0004175,0016825,0005575,0005615,0140096,0048523,0016787,0070011,0051171,0051246,0051172,0032268,0051248,0051346,0003824,0050790,0008233,0010605,0008236,0044237,0044238,0010951,0008150,0043170,0016043,0071704,0050794,0019538,0003674,1901564,0052547,0010466…
TRINITY_DN136_c1_g1_i3	Interleukin-8	2.601	122.969	73.953	1284.09	67.061	160.84	102.105	500.321	4556.78	51.943	692.266	518	1	0071310,0051707,0003674,0006954,0071219,0033993,0040011,0071621,0019221,0005153,0071222,0005515,0042119,0044419,0016477,0032496,0006935,0060326,0097530,0005126,0009987,0005102,0071396,0006955,0019730,0048018,0001664,0002274,0048870,0002376,0005575,0006952,0005615,0002237,0007166,0098772,0030595,0030545,0045236,0042379,0030546,0006959,1990266,0050900,0050794,0110165,0008150,0042330,0070098,0008009…
TRINITY_DN246_c0_g1_i8	phosphate carrier protein, mitochondrial	162.061	231.765	102.973	203.369	219.783	697.576	941.211	234.88	108.278	84.71	298.661	1645	3	0031304,0031305,0031300,0031301,0098573,0110165,0031224,0005575,0032592,0016021
TRINITY_DN246_c0_g1_i2	phosphate carrier protein, mitochondrial	0	109.124	43.028	22.942	12.272	327.589	889.552	6.053	0	0	141.056	863	1	0031304,0031305,0031300,0031301,0098573,0110165,0031224,0005575,0032592,0016021
TRINITY_DN246_c0_g1_i7	phosphate carrier protein, mitochondrial	42.003	90.469	30.629	52.991	56.387	223.096	316.879	58.087	20.938	17.249	90.8728	3306	3	0031304,0031305,0031300,0031301,0098573,0110165,0031224,0005575,0032592,0016021
TRINITY_DN246_c0_g1_i9	L-lactate dehydrogenase	123.085	11.633	13.414	16.751	111.127	10.923	18.309	136.063	27.063	41.934	51.0302	863	1	0031224,0098573,0043436,0019752,0031304,0031305,0044281,0031301,0009987,0016491,0110165,0005575,0032592,0005975,0003824,0044237,0044238,0031300,0016021,0008150,0071704,0004457,0004459,0003674,0006082,0016614,0016616
TRINITY_DN246_c0_g1_i4	phosphate carrier protein, mitochondrial	0.853	8.478	1.587	1.626	4.234	14.642	4.328	3.42	2.722	3.43	4.532	1669	3	0031304,0031305,0031300,0031301,0098573,0110165,0031224,0005575,0032592,0016021
TRINITY_DN2702_c0_g1_i2	NADH dehydrogenase ubiquinone 1 beta subcomplex subunit 3	164.152	355.02	503.01	419.391	434.088	2320.39	996.217	224.466	254.915	331.656	600.33	400	1	0030964,0005747,0032991,1990204,0055114,0098796,0009987,0006091,0098803,0098800,0045271,1902494,0044237,0005575,0022900,0008150
TRINITY_DN2702_c0_g1_i4	NADH dehydrogenase ubiquinone 1 beta subcomplex subunit 3	4.377	8.192	4.076	6.351	3.503	12.749	12.09	0.602	0.947	8.743	6.163	496	1	0030964,0005747,0032991,1990204,0055114,0098796,0009987,0006091,0098803,0098800,0045271,1902494,0044237,0005575,0022900,0008150
TRINITY_DN1834_c0_g1_i38	putative slow skeletal troponin T family protein -related	0	3.006	1.093	1.022	0.501	0.422	3493.84	33.993	0.559	0	353.443	1803	1	0003012,0005509,0006936,0006941,0060048,0003008,0003674,0032501,0043167,0043169,0046872,0003009,0008150
TRINITY_DN1834_c0_g1_i78	troponin T, cardiac muscle-like	0	0	0	0	0	0	828.323	7.556	0	0	83.5879	412	1	0003012,0090257,0032991,0006937,0006936,0006941,0003674,0003008,0005861,0046872,0032501,0060048,0005575,0043167,0044057,0043169,0005509,0003009,0051239,0008150
TRINITY_DN1834_c0_g1_i4	putative slow skeletal troponin T family protein -related	0.065	0	0	0.177	0	0	550.776	4.277	0	0	55.5295	2199	1	0003012,0005509,0006936,0006941,0060048,0003008,0003674,0032501,0043167,0043169,0046872,0003009,0008150
TRINITY_DN1834_c0_g1_i130	Synaptonemal complex protein 3	2.123	0.644	0.35	0.162	0.197	0.876	154.124	1.638	1.172	0.043	16.1329	3455	2	0140013,0048869,0060048,0043167,0043169,0006996,0110165,0048468,0006936,0009987,0099086,0005575,0003012,0048856,0007281,0032501,0007286,0003009,0008150,0003006,0005509,0000795,0032502,0006941,0003674,0003008,0016043,0048285,0022414,0046872,0000280,0022412,0071840
TRINITY_DN1834_c0_g1_i29	putative slow skeletal troponin T family protein -related	0	0.353	0	0	0	0	46.147	0	0.458	0	4.6958	2320	1	0003012,0005509,0006936,0006941,0060048,0003008,0003674,0032501,0043167,0043169,0046872,0003009,0008150
TRINITY_DN1664_c0_g2_i1	ATP synthase subunit beta	434.18	233.607	282.069	235.405	456.001	1817.28	1901.79	317.448	108.669	74.401	586.085	2007	1	0015075,0016818,0015252,0015078,0015077,0045259,0022803,0005753,0016887,0015267,0005261,0005575,0016787,0042626,0016817,0022857,0098800,0022853,0003824,0016740,0022890,0016462,0005216,0017111,0032991,0046933,0098796,0008324,0016469,0016776,0003674,0015399,0016772,0022804
TRINITY_DN1037_c0_g1_i2	Heart-type fatty acid-binding protein	10.733	13.854	131.99	51.285	33.21	985.537	1566.54	157.045	68.27	484.216	350.268	970	1	0008289,0003674
TRINITY_DN1037_c0_g1_i3	Heart-type fatty acid-binding protein	10.51	6.862	58.641	0.81	15.57	1181.32	538.657	28.321	6.281	180.213	202.719	600	1	0008289,0003674
TRINITY_DN1037_c0_g1_i1	Fatty acid binding protein 3, muscle and heart	0.161	0.258	1.759	1.049	0.756	15.601	19.954	3.46	1.441	15.74	6.0179	3192	2	0003143,0009792,0002009,0048598,0048856,0043009,0008289,0003674,0035239,0032502,0032501,0007275,0009653,0048729,0008150,0001947,0060562
TRINITY_DN626_c2_g2_i3	TRINITY_DN626_c2_g2_i3	0.081	0.273	0.351	0	0	0.163	0	0	0.52	5106.11	510.75	1115	0
TRINITY_DN626_c2_g2_i2	glycolipid transfer protein -related	0.03	0.445	0.154	0.534	0.215	0.317	0	0.312	0.298	31.476	3.3781	1958	0
TRINITY_DN644_c1_g2_i28	MHC class II antigen	45.735	1497.04	139.309	801.366	40.353	260.43	82.92	358.256	725.682	48.365	399.946	1704	1
TRINITY_DN644_c1_g2_i25	MHC class II antigen	2.785	797.707	54.598	486.021	25.174	139.327	61.921	226.539	312.318	15.896	212.229	1729	1
TRINITY_DN8578_c0_g2_i1	ATP synthase peripheral stalk subunit d	275.612	213.608	416.625	265.668	525.597	2477.5	1154.45	246.039	169.484	103.623	584.821	755	1	0015252,0044237,0044238,0046034,0009117,0016887,0009987,0009199,0019693,0018130,1901362,1901360,0034220,0009205,0009201,0022890,0033177,0017111,0032991,0006163,0009165,0006164,1901564,0015399,0022804,0009259,0015075,0015077,0098662,0098660,0015078,0090407,0019637,0019438,0015985,0015986,0022803,0016740,0044281,0072521,0015267,0072522,0005261,0005575,0006753,0006754,1901566,0098800,0009260,0008150…
TRINITY_DN20320_c0_g3_i1	SERPIN domain-containing protein	0	0	2.431	0	369.421	0.378	1368.98	4266.46	0	0	600.767	354	1	0044092,0052548,0009892,0030414,0070011,0004867,0031323,0030162,0019222,0004252,0051336,0006807,0110165,0080090,0044267,0009987,0045861,0140096,0044260,0006508,0004175,0016825,0005575,0005615,1901564,0048523,0016787,0098772,0004857,0051171,0051246,0051172,0032268,0051248,0051346,0003824,0050790,0008233,0010605,0008236,0044237,0044238,0010951,0004866,0061135,0008150,0043170,0071704,0050794,0019538…
TRINITY_DN1071_c14_g1_i1	TRINITY_DN1071_c14_g1_i1	0	15.873	9.682	0	8.745	538.922	4427.01	65.077	1.54	0	506.685	210	0
TRINITY_DN2258_c0_g1_i1	40S ribosomal protein S6	155.045	351.557	173.176	395.777	175	680.828	645.409	547.606	508.535	713.021	434.595	1935	2	0005840,0006412,0044271,0043604,0043603,0006807,0044260,0043043,0044249,0044267,0009987,0110165,0006518,0005575,1901564,0043232,1901576,0009058,0044237,0044238,0008150,0043170,0071704,0009059,0034641,0034645,0003735,0003674,0043228,0043229,0005198,0019538,1901566,0043226
TRINITY_DN2258_c0_g1_i21	40S ribosomal protein S6	63.366	130.246	56.282	94.23	56.638	203.502	221.218	179.098	157.869	254.505	141.695	2675	3	0005840,0006412,0044271,0043604,0043603,0006807,0110165,0043043,0044249,0044267,0009987,0044260,0043229,0005575,1901564,0043232,1901576,0009058,0044237,0044238,0008150,0043170,0071704,0009059,0034641,0034645,0003735,0003674,0043228,0006518,0005198,0019538,1901566,0043226
TRINITY_DN2462_c2_g1_i2	Cystatin-C	109.272	506.469	598.521	440.262	1286.52	843.978	298.665	231.423	729.515	868.164	591.279	1091	1	0004869,0098772,0030234,0030414,0004857,0003674,0004866,0061134,0061135,0005575,0110165,0005615
TRINITY_DN2462_c2_g1_i3	Cystatin-C	0.115	3.005	0.847	4.391	2.699	1.229	1.221	11.815	1.402	3.094	2.9818	1141	1	0004869,0098772,0030234,0030414,0004857,0003674,0004866,0061134,0061135,0005575,0110165,0005615
TRINITY_DN4423_c0_g1_i1	Apolipoprotein Eb	0.846	116.233	557.898	59.124	925.386	53.011	632.499	3171.36	56.472	314.413	588.724	1736	1
TRINITY_DN4423_c0_g1_i5	Apolipoprotein E	0	1.121	5.582	2.19	24.799	1.778	6.093	43.708	2.336	1.815	8.9422	1637	2	0006066,0051234,0008610,0005496,0046470,0097159,0044238,0043167,1902653,0043169,0043168,0031210,0042157,0006807,1902652,0008202,0070405,0046486,0044281,0006869,0009987,0006650,0008289,0110165,0006796,0008203,0006793,0005575,0005576,1901617,1901564,1901615,0050997,1901576,0032934,0046165,1901362,1901360,0051179,0006694,0006695,0044255,0043178,0044237,0097164,0008150,0043170,0071704,0009058,0006629…
TRINITY_DN2104_c0_g2_i2	Somatotropin	0	0.078	6455.16	0	0	0	0	0	0	0	645.524	942	1	0009991,0031667,0051427,0097696,0005131,0046427,0046425,0110165,1904892,0005126,0009987,0005102,1904894,0005515,0048018,0005575,0005615,0007259,0007166,0009967,0009966,0098772,0030545,0030546,0050794,0005179,0008150,0007165,0010646,0010647,0003674,0023051,0048522,0023056
TRINITY_DN2104_c0_g2_i1	Somatotropin	0	0	19.954	0	0	0	0	0	0	0	1.9954	1017	1	0009991,0031667,0051427,0097696,0005131,0046427,0046425,0110165,1904892,0005126,0009987,0005102,1904894,0005515,0048018,0005575,0005615,0007259,0007166,0009967,0009966,0098772,0030545,0030546,0050794,0005179,0008150,0007165,0010646,0010647,0003674,0023051,0048522,0023056
TRINITY_DN2104_c0_g2_i3	Somatotropin	0	0	16.243	0	0	0	0	0	0	0	1.6243	1585	3	0009991,0031667,0051427,0097696,0005131,0046427,0046425,0110165,1904892,0005126,0009987,0005102,1904894,0005515,0048018,0005575,0005615,0007259,0007166,0009967,0009966,0098772,0030545,0030546,0050794,0005179,0008150,0007165,0010646,0010647,0003674,0023051,0048522,0023056
TRINITY_DN2104_c0_g2_i4	Somatotropin	0	0	15.585	0	0	0.045	0	0	0.169	0	1.5799	1510	3	0009991,0031667,0051427,0097696,0005131,0046427,0046425,0110165,1904892,0005126,0009987,0005102,1904894,0005515,0048018,0005575,0005615,0007259,0007166,0009967,0009966,0098772,0030545,0030546,0050794,0005179,0008150,0007165,0010646,0010647,0003674,0023051,0048522,0023056
TRINITY_DN3675_c0_g1_i2	cytochrome c oxidase copper chaperone	2363.02	112.088	219.193	143.384	246.258	2156.72	380.999	130.77	151.862	70.261	597.456	592	1	0051234,0043167,0031970,0031974,0006825,0043169,0000041,0005758,0110165,0005575,0043233,0046688,0070013,0051179,0010035,0006812,0006811,0008150,0016530,0016531,0030001,0005507,0003674,0010038,0046872,0046914
TRINITY_DN4155_c0_g1_i7	ATP synthase subunit O, mitochondrial	248.257	193.278	561.809	259.789	645.23	1930.83	1213.47	222.901	173.995	167.169	561.673	887	1	0015075,0051234,0015077,1901293,0098660,1901137,0015252,0009201,0015078,0046390,0009144,0006812,0003674,0072521,0009152,0009150,0015985,0046034,0098662,0006807,0009117,0044249,0034654,0016740,0055085,0046483,0055086,0009987,0009199,0005216,0003824,0008150,0006139,0015267,0072522,0005261,0006796,0019693,0022890,0017144,0006754,0018130,1901566,1901576,1901135,1901362,1901360,0019438,0022857,0051179…
TRINITY_DN2543_c8_g3_i2	enolase 1A, alpha	33.54	239.994	1103.67	487.572	836.404	1258.91	497.384	289.49	286.063	555.048	558.808	1152	1
TRINITY_DN2543_c8_g3_i3	Gamma-enolase	0	0	139.092	0.05	29.825	0.05	0.217	0.234	0.047	0.119	16.9634	1385	1
TRINITY_DN1896_c6_g1_i2	fast skeletal muscle troponin T	3.788	0	0.123	0	1.262	0.866	3836.77	7.783	0.138	0	385.073	610	1	0003012,0005509,0006936,0006941,0060048,0003008,0003674,0032501,0043167,0043169,0046872,0003009,0008150
TRINITY_DN1896_c6_g1_i3	keratin-associated protein 21-1	2.618	0	0	0	0.489	0	894.861	1.798	0	0	89.9766	331	0
TRINITY_DN1896_c6_g1_i4	fast skeletal muscle troponin T	0	0	0	0	0	0	14.05	0	0	0	1.405	734	1	0003012,0005509,0006936,0006941,0060048,0003008,0003674,0032501,0043167,0043169,0046872,0003009,0008150
TRINITY_DN250_c0_g3_i1	glyceraldehyde-3-phosphate dehydrogenase 2	4.64	73.94	1409.75	313.211	1690.69	1296.25	154.896	690.386	304.576	6.116	594.445	1485	1	0097159,0008150,0008146,0000166,0005996,0016740,0044281,0048037,0016491,1901265,0016620,0050662,0051287,0016903,0050661,1901363,0016782,0005975,0003824,0044238,0019318,0071704,0003674,0006006,0036094
TRINITY_DN1001_c0_g1_i2	Ribosomal protein S29	209.61	402.857	433.808	370.869	292.255	658.464	580.478	566.982	788.609	1185.32	548.925	1381	1	0015935,0032991,0005575,0022627,0044391,1990904
TRINITY_DN2232_c0_g1_i3	Cystatin 14a, tandem duplicate 1	45.582	487.473	299.226	465.853	165.871	296.461	260.054	920.985	592.055	144.913	367.847	619	1	0005575,0005829,0110165
TRINITY_DN2232_c0_g1_i1	Cystatin domain-containing protein	6.515	0	0.341	0	5.951	0	87.777	576.777	0	0	67.7361	643	1	0004869,0098772,0030234,0030414,0004857,0003674,0004866,0061134,0061135,0005575,0110165,0005829
TRINITY_DN2232_c0_g1_i29	Cystatin domain-containing protein	0	0	1.479	0.139	20.813	0	99.162	429.181	0	0	55.0774	643	1	0004869,0098772,0030234,0030414,0004857,0003674,0004866,0061134,0061135,0005575,0110165,0005829
TRINITY_DN2232_c0_g1_i2	Cystatin 14a, tandem duplicate 1	0	0	0	0	8.138	0	109.705	312.167	0	0.632	43.0642	433	1	0005575,0005829,0110165
TRINITY_DN2232_c0_g1_i34	Cystatin domain-containing protein	0	0	0	0	22.915	0	39.265	140.709	0	0	20.2889	644	1	0004869,0098772,0030234,0030414,0004857,0003674,0004866,0061134,0061135,0005575,0110165,0005829
TRINITY_DN2232_c0_g1_i20	cystatin-B-like	0.142	0	0	0	1.571	0	8.265	44.237	0	0	5.4215	581	1	0005575,0005829,0110165
TRINITY_DN2232_c0_g1_i15	Cystatin 14a, tandem duplicate 1	9.687	0.171	0	12.694	0.713	0	2.714	13.269	1.328	0.424	4.1	544	1	0004869,0098772,0030234,0030414,0004857,0003674,0004866,0061134,0061135,0005575,0110165,0005829
TRINITY_DN2232_c0_g1_i6	Cystatin domain-containing protein	0	0	0	0	19.236	0	7.741	10.379	0	0	3.7356	765	1	0004869,0098772,0030234,0030414,0004857,0003674,0004866,0061134,0061135,0005575,0110165,0005829
TRINITY_DN2232_c0_g1_i49	TRINITY_DN2232_c0_g1_i49	0.373	0.103	0	0	2.679	0.105	1.759	22.731	0	0	2.775	764	0
TRINITY_DN2232_c0_g1_i41	cystatin-B-like	0	0	0	0	2.905	0	1.656	11.804	0	0	1.6365	765	1	0098772,0004857,0030414,0030234,0003674,0004866,0061134,0061135,0005575,0110165,0005829
TRINITY_DN1949_c0_g1_i30	leukocyte elastase inhibitor-like	0	0	2.194	0	293.488	0.306	894.434	2035.76	0.281	0	322.647	799	1	0052548,0009892,0003674,0044092,0030162,0019222,0004252,0051336,0006807,0044260,0080090,0044267,0009987,0045861,0140096,0110165,0006508,0004175,0031323,0016825,0005575,0005615,1901564,0048523,0016787,0070011,0051171,0051246,0051172,0051248,0051346,0003824,0050790,0008233,0010605,0008236,0044237,0044238,0010951,0008150,0043170,0071704,0050794,0019538,0032268,0052547,0010466,0032269,0017171,0060255…
TRINITY_DN1949_c0_g1_i12	leukocyte elastase inhibitor-like	0	0.215	0	0	17.059	0	82.29	386.298	0	0	48.5862	475	1	0052548,0009892,0003674,0044092,0030162,0019222,0004252,0051336,0006807,0044260,0080090,0044267,0009987,0045861,0140096,0110165,0006508,0004175,0031323,0016825,0005575,0005615,1901564,0048523,0016787,0070011,0051171,0051246,0051172,0051248,0051346,0003824,0050790,0008233,0010605,0008236,0044237,0044238,0010951,0008150,0043170,0071704,0050794,0019538,0032268,0052547,0010466,0032269,0017171,0060255…
TRINITY_DN1949_c0_g1_i21	leukocyte elastase inhibitor-like	3.628	293.823	12.106	15.522	7.561	73.295	20.94	41.343	12.561	1.453	48.2232	1266	2	0052548,0009892,0003674,0044092,0030162,0019222,0004252,0051336,0006807,0044260,0080090,0044267,0009987,0045861,0140096,0110165,0006508,0004175,0031323,0016825,0005575,0005615,1901564,0048523,0016787,0070011,0051171,0051246,0051172,0051248,0051346,0003824,0050790,0008233,0010605,0008236,0044237,0044238,0010951,0008150,0043170,0071704,0050794,0019538,0032268,0052547,0010466,0032269,0017171,0060255…
TRINITY_DN1949_c0_g1_i2	leukocyte elastase inhibitor-like	0	0	0.205	0	12.187	0.072	57.681	353.402	0.104	0	42.3651	2628	2	0044092,0052548,0009892,0030414,0070011,0004867,0031323,0030162,0019222,0004252,0051336,0006807,0110165,0080090,0044267,0009987,0045861,0140096,0044260,0006508,0004175,0016825,0005575,0005615,1901564,0048523,0016787,0098772,0004857,0051171,0051246,0051172,0032268,0051248,0051346,0003824,0050790,0008233,0010605,0008236,0044237,0044238,0010951,0004866,0061135,0008150,0043170,0071704,0050794,0019538…
TRINITY_DN1949_c0_g1_i3	leukocyte elastase inhibitor-like	0	0.525	0.342	0	14.542	0	5.021	216.2	0.118	0	23.6748	863	1	0052548,0009892,0003674,0044092,0030162,0019222,0004252,0051336,0006807,0044260,0080090,0044267,0009987,0045861,0140096,0110165,0006508,0004175,0031323,0016825,0005575,0005615,1901564,0048523,0016787,0070011,0051171,0051246,0051172,0051248,0051346,0003824,0050790,0008233,0010605,0008236,0044237,0044238,0010951,0008150,0043170,0071704,0050794,0019538,0032268,0052547,0010466,0032269,0017171,0060255…
TRINITY_DN1949_c0_g1_i32	TRINITY_DN1949_c0_g1_i32	0	0	0.126	0	1.468	0	9.258	147.85	0	0	15.8702	595	0
TRINITY_DN1949_c0_g1_i23	Serpin peptidase inhibitor, clade B ovalbumin , member 1	0	0.118	0.204	0	4.825	0	1.531	145.127	0	0	15.1805	695	1	0044092,0052548,0009892,0030414,0070011,0004867,0031323,0030162,0019222,0004252,0051336,0006807,0110165,0080090,0044267,0009987,0045861,0140096,0044260,0006508,0004175,0016825,0005575,0005615,1901564,0048523,0016787,0098772,0004857,0051171,0051246,0051172,0032268,0051248,0051346,0003824,0050790,0008233,0010605,0008236,0044237,0044238,0010951,0004866,0061135,0008150,0043170,0071704,0050794,0019538…
TRINITY_DN1949_c0_g1_i18	leukocyte elastase inhibitor-like	2.022	108.467	4.53	5.128	0	17.704	8.25	0	3.349	0.477	14.9927	2248	2	0044092,0052548,0009892,0030414,0070011,0004867,0031323,0030162,0019222,0004252,0051336,0006807,0110165,0080090,0044267,0009987,0045861,0140096,0044260,0006508,0004175,0016825,0005575,0005615,1901564,0048523,0016787,0098772,0004857,0051171,0051246,0051172,0032268,0051248,0051346,0003824,0050790,0008233,0010605,0008236,0044237,0044238,0010951,0004866,0061135,0008150,0043170,0071704,0050794,0019538…
TRINITY_DN1949_c0_g1_i17	leukocyte elastase inhibitor-like	0	68.284	0	2.057	0	10.564	2.541	0.682	0	0	8.4128	394	1	0052548,0009892,0003674,0044092,0030162,0019222,0004252,0051336,0006807,0044260,0080090,0044267,0009987,0045861,0140096,0110165,0006508,0004175,0031323,0016825,0005575,0005615,1901564,0048523,0016787,0070011,0051171,0051246,0051172,0051248,0051346,0003824,0050790,0008233,0010605,0008236,0044237,0044238,0010951,0008150,0043170,0071704,0050794,0019538,0032268,0052547,0010466,0032269,0017171,0060255…
TRINITY_DN1949_c0_g1_i34	leukocyte elastase inhibitor-like	0	0	0	0	2.043	0	0	66.571	0	0	6.8614	2268	2	0044092,0052548,0009892,0030414,0070011,0004867,0031323,0030162,0019222,0004252,0051336,0006807,0110165,0080090,0044267,0009987,0045861,0140096,0044260,0006508,0004175,0016825,0005575,0005615,1901564,0048523,0016787,0098772,0004857,0051171,0051246,0051172,0032268,0051248,0051346,0003824,0050790,0008233,0010605,0008236,0044237,0044238,0010951,0004866,0061135,0008150,0043170,0071704,0050794,0019538…
TRINITY_DN1949_c0_g1_i33	leukocyte elastase inhibitor-like	0	0	0	0	0	0	10.075	32.752	0	0	4.2827	2648	2	0044092,0052548,0009892,0030414,0070011,0004867,0031323,0030162,0019222,0004252,0051336,0006807,0110165,0080090,0044267,0009987,0045861,0140096,0044260,0006508,0004175,0016825,0005575,0005615,1901564,0048523,0016787,0098772,0004857,0051171,0051246,0051172,0032268,0051248,0051346,0003824,0050790,0008233,0010605,0008236,0044237,0044238,0010951,0004866,0061135,0008150,0043170,0071704,0050794,0019538…
TRINITY_DN1949_c0_g1_i19	SERPIN domain-containing protein	0	0	0	0	4.56	0	19.375	10.73	0	0	3.4665	580	1	0044092,0052548,0009892,0030414,0070011,0004867,0031323,0030162,0019222,0004252,0051336,0006807,0110165,0080090,0044267,0009987,0045861,0140096,0044260,0006508,0004175,0016825,0005575,0005615,1901564,0048523,0016787,0098772,0004857,0051171,0051246,0051172,0032268,0051248,0051346,0003824,0050790,0008233,0010605,0008236,0044237,0044238,0010951,0004866,0061135,0008150,0043170,0071704,0050794,0019538…
TRINITY_DN1949_c0_g1_i22	leukocyte elastase inhibitor-like	0.722	9.559	9.511	2.243	3.018	1.4	0.411	2.301	0.838	0	3.0003	443	1	0052548,0009892,0003674,0044092,0030162,0019222,0004252,0051336,0006807,0044260,0080090,0044267,0009987,0045861,0140096,0110165,0006508,0004175,0031323,0016825,0005575,0005615,1901564,0048523,0016787,0070011,0051171,0051246,0051172,0051248,0051346,0003824,0050790,0008233,0010605,0008236,0044237,0044238,0010951,0008150,0043170,0071704,0050794,0019538,0032268,0052547,0010466,0032269,0017171,0060255…
TRINITY_DN2880_c0_g1_i5	Cold-inducible RNA-binding protein	356.249	233.815	457.164	407.212	542.57	419.92	349.935	474.21	382.895	452.294	407.626	3060	2	1901363,0032991,0003723,0003674,0005681,0097159,0005575,0003676,1990904
TRINITY_DN2880_c0_g1_i3	Cold-inducible RNA-binding protein	30.225	48.712	56.273	135.18	51.244	60.717	81.499	179.411	140.681	59.592	84.3534	2997	2	1901363,0032991,0003723,0003674,0005681,0097159,0005575,0003676,1990904
TRINITY_DN2880_c0_g1_i2	Cold-inducible RNA-binding protein	4.576	66.989	23.647	34.941	29.517	42.948	11.317	37.497	38.945	106.39	39.6767	3515	2	1901363,0032991,0003723,0003674,0005681,0097159,0005575,0003676,1990904
TRINITY_DN2880_c0_g1_i6	Cold inducible RNA binding protein b	2.907	16.417	21.047	29.721	25.817	31.702	27.84	16.746	12.267	17.109	20.1573	2041	1	0097159,0003723,1901363,0003674,0003676
TRINITY_DN2880_c0_g1_i8	Cold-inducible RNA-binding protein	0.692	16.217	5.153	12.194	10.641	14.194	10.038	5.333	4.636	19.759	9.8857	3144	2	1901363,0032991,0003723,0003674,0005681,0097159,0005575,0003676,1990904
TRINITY_DN1071_c20_g1_i1	40S ribosomal protein S27	154.969	419.773	281.3	320.453	207.644	590.646	1236.02	433.492	335.088	1219.43	519.882	250	1	0044271,0097159,0043603,0006807,0043043,0044391,0044249,0022627,1990904,0044267,0009987,0003723,0044260,0005575,1901564,1901566,1901576,1901363,0009058,0044237,0044238,0008150,0043170,0071704,0043604,0009059,0034641,0015935,0032991,0034645,0003735,0003674,0003676,0006518,0005198,0019538,0006412
TRINITY_DN3359_c0_g1_i26	Putative cathepsin E-like	9.099	0	0	0.046	0	0	0.202	0.119	0	4371.13	438.06	1475	1	0016787,0070001,0070011,0140096,0003674,0003824,0004175,0008233,0004190
TRINITY_DN3359_c0_g1_i39	Nothepsin	0.077	0.429	0	0	0	0.085	0	0	0.299	181.97	18.286	1683	2	0016787,0070001,0070011,0140096,0003674,0003824,0004175,0008233,0004190
TRINITY_DN3359_c0_g1_i32	Putative cathepsin E-like	0	0.077	0.177	0	0.102	0.067	0	0	0	29.849	3.0272	1834	2	0016787,0070001,0070011,0140096,0003674,0003824,0004175,0008233,0004190
TRINITY_DN3359_c0_g1_i3	Putative cathepsin E-like	0	0	0	0	0	0	0	0	0	21.326	2.1326	1607	1	0016787,0070001,0070011,0140096,0003674,0003824,0004175,0008233,0004190
TRINITY_DN3359_c0_g1_i13	cathepsin E-like	0	0	0	0	0.069	0	0	0	0	14.368	1.4437	1447	2	0016787,0070001,0070011,0140096,0003674,0003824,0004175,0008233,0004190
TRINITY_DN3359_c0_g1_i12	Putative cathepsin E-like	0	0.071	0.112	0	0	0	0	0.05	0	12.282	1.2515	1566	2	0016787,0070001,0070011,0140096,0003674,0003824,0004175,0008233,0004190
TRINITY_DN6606_c0_g1_i5	ATP-synt DE N domain-containing protein	220.868	219.4	331.137	236.201	498.15	1931.21	1150.07	192.649	139.031	161.66	508.037	873	1	0015252,0044237,0044238,0046034,0009117,0016887,0009987,0009199,0019693,0018130,1901362,1901360,0009206,0009205,0009201,0022890,0017111,0006163,0009165,0006164,1901564,0015399,0022804,0009259,0015075,0015077,0098662,0098660,0015078,0090407,0019637,0019438,0015985,0015986,0022803,0016740,0044281,0072521,0015267,0072522,0005261,0006753,0006754,1901566,0009260,0008150,1901576,0015672,0046933,0009141…
TRINITY_DN6606_c0_g1_i1	ATP-synt DE N domain-containing protein	1.602	18.459	41.62	17.321	37.563	30.715	60.689	16.768	12.153	5.065	24.1955	1010	1	0015252,0044237,0044238,0046034,0009117,0016887,0009987,0009199,0019693,0018130,1901362,1901360,0009206,0009205,0009201,0022890,0017111,0006163,0009165,0006164,1901564,0015399,0022804,0009259,0015075,0015077,0098662,0098660,0015078,0090407,0019637,0019438,0015985,0015986,0022803,0016740,0044281,0072521,0015267,0072522,0005261,0006753,0006754,1901566,0009260,0008150,1901576,0015672,0046933,0009141…
TRINITY_DN375_c1_g1_i1	parvalbumin beta-like	0.295	0	0.173	0.314	0.996	0	4542.34	24.357	0	0	456.847	779	1
TRINITY_DN343_c0_g1_i2	Mitochondrial ATP synthase subunit f	174.088	251.429	612.285	250.814	525.525	1591.25	1207.17	233.2	182.215	274.952	530.292	614	1
TRINITY_DN3857_c1_g1_i12	C20orf52	220.565	288.67	236.729	240.039	296.399	1118.55	1274.68	204.804	250.622	469.015	460.007	572	1	0051234,0015031,0008104,0015833,0045039,0051641,0006996,0033036,0051649,0033365,0006886,0061024,0009987,0007006,0007007,0007005,0034613,0098796,0005575,0046907,0045184,0051179,0098800,0072657,0072655,0006839,0051205,0042886,0008150,0070585,0071705,0032991,0071702,0005744,0090150,0051204,0070727,0016043,0072594,0090151,0071840
TRINITY_DN3857_c1_g1_i11	Prefoldin subunit 3	63.148	44.394	30.351	40.807	25.424	34.02	134.37	56.581	35.79	42.381	50.7266	1347	1	0005844,0065003,0110165,0007021,1990904,0009987,0005515,0016272,0005575,0034622,0005737,0043933,0008150,0006457,0032991,0007017,0015631,0003674,0016043,0008092,0022607,0071840
TRINITY_DN3857_c1_g1_i5	Prefoldin subunit 3	8.786	8.492	4.753	8.976	3.785	4.096	19.025	10.21	6.69	5.752	8.0565	1715	3	0005737,0009987,0006457,0007017,0015631,0003674,0110165,0016272,0008092,0005575,0005515,0008150,0032991
TRINITY_DN2387_c0_g1_i7	NADH dehydrogenase ubiquinone iron-sulfur protein 7, mitochondrial	124.893	111.665	316.098	154.081	691.775	705.149	696.913	84.842	97.556	66.212	304.918	718	1	0030964,0009060,1902494,0045333,0015980,0003954,0009987,0006091,0016491,0005575,1990204,0055114,0098803,0098800,0003824,0044237,0008150,0045271,0005747,0032991,0098796,0016651,0003674
TRINITY_DN2387_c0_g1_i8	NADH ubiquinone oxidoreductase core subunit S7	110.115	63.219	231.66	63.372	537.298	782.271	395.904	38.603	46.832	54.07	232.334	686	1	0030964,0050136,0051540,0009060,1902494,0045333,0043167,0043169,0015980,0048037,0003954,0048038,0006091,0016491,0051539,0098796,0005575,0051536,1990204,0055114,0098803,0098800,0003824,0044237,0008150,0045271,0005747,0032991,0016655,0016651,0003674,0008137,0046872,0009987
TRINITY_DN2413_c1_g1_i2	sodium/potassium-transporting ATPase subunit alpha	8.048	1666.29	28.247	2524.28	177.678	195.413	285.066	177.428	165.113	92.974	532.053	622	1	0051234,0015672,0098660,0055085,1902600,0009987,0051179,0034220,0006812,0098662,0098655,0006811,0008150
TRINITY_DN2413_c1_g1_i1	Sodium/potassium-transporting ATPase subunit alpha	0.062	34.855	0.294	26.94	1.719	4.071	1.149	1.075	2.393	1.786	7.4344	1693	1	0051234,0015672,0098660,0055085,1902600,0009987,0051179,0034220,0006812,0098662,0098655,0006811,0008150
TRINITY_DN540_c0_g1_i5	eukaryotic translation elongation factor 1 delta A guanine nucleotide exchange protein	548.235	374.728	124.401	231.086	434.485	97.187	142.242	411.222	325.835	1280.47	396.989	673	1	1901576,0071704,0098772,0051020,0003674,0034645,0009987,0009058,0009059,0110165,0005829,0044260,0044249,0005085,0044237,0005575,0006414,0005515,0008150,0043170,0019899
TRINITY_DN540_c0_g1_i1	eukaryotic translation elongation factor 1 delta A guanine nucleotide exchange protein	0	2.611	4.855	0.749	83.922	518.779	431.714	2.833	7.102	2.522	105.509	739	1	1901576,0071704,0098772,0051020,0003674,0034645,0009987,0009058,0009059,0110165,0005829,0044260,0044249,0005085,0044237,0005575,0006414,0005515,0008150,0043170,0019899
TRINITY_DN540_c0_g1_i2	elongation factor 1-delta-like	0.313	0.094	0	0	3.302	0.426	152.076	1.328	0	0	15.7539	1131	1	1901576,0071704,0098772,0051020,0003674,0034645,0009987,0009058,0009059,0110165,0005829,0044260,0044249,0005085,0044237,0005575,0006414,0005515,0008150,0043170,0019899
TRINITY_DN435_c0_g1_i33	60S ribosomal protein L13a	222.694	177.313	163.072	146.668	117.874	245.7	368.554	323.389	323.306	498.801	258.737	1342	3	0005840,0003723,0043604,1901566,0043603,0032259,0019752,0009987,0110165,0010556,0006779,0006778,0010558,0018130,1901363,1901362,1901360,0044237,0032991,0060255,0048523,0006760,0051188,0042559,0042558,0046394,0051186,0008168,0043436,0016741,0016740,0044281,0003729,0016053,0005575,0043231,1901564,0043232,0032268,0032269,0046148,0008150,1901576,0042398,0043228,0043229,0043226,0043227,0009892,0009890…
TRINITY_DN435_c0_g1_i39	60S ribosomal protein L13a	84.759	151.626	127.652	83.661	90.287	219.716	232.78	306.22	256.106	421.87	197.468	1646	3	0005840,0009892,0009890,2000113,2000112,0097159,0019222,0051171,0044260,0044249,0005737,0080090,1990904,0003729,0031326,0031327,0031324,0003723,0031323,0110165,0010556,0034248,0017148,0005575,0010558,0048523,0071704,1901363,0051246,0051172,0051248,0009889,0010468,0032268,0010629,0010605,0050794,0044237,0010608,0008150,0043170,0034249,1901576,0009059,0009058,0032991,0032269,0060255,0003735,0034645…
TRINITY_DN435_c0_g1_i8	60S ribosomal protein L13A	32.665	37.716	27.073	38.577	30.985	90.539	78.147	79.521	74.796	94.984	58.5003	1464	2	0005840,0009892,0009890,2000113,2000112,0097159,0019222,0051171,0044260,0044249,0005737,0080090,1990904,0003729,0031326,0031327,0031324,0003723,0031323,0110165,0010556,0043170,0017148,0005575,0010558,0043232,0071704,1901363,0051246,0051172,0051248,0009889,0032268,0010629,0010605,0050794,0044237,0010608,0008150,0034248,0034249,1901576,0009059,0009058,0032991,0032269,0034645,0010468,0003674,0003676…
TRINITY_DN435_c0_g1_i7	60S ribosomal protein L13A	2.558	8.429	6.175	7.143	4.619	14.987	8.439	13.694	16.396	16.622	9.9062	2219	3	0005840,0009892,0009890,2000113,2000112,0097159,0019222,0051171,0044260,0044249,0005737,0080090,1990904,0003729,0031326,0031327,0031324,0003723,0031323,0110165,0010556,0043170,0017148,0005575,0010558,0043232,0071704,1901363,0051246,0051172,0051248,0009889,0032268,0010629,0010605,0050794,0044237,0010608,0008150,0034248,0034249,1901576,0009059,0009058,0032991,0032269,0034645,0010468,0003674,0003676…
TRINITY_DN7522_c0_g1_i5	ATP synthase peripheral stalk-membrane subunit b	185.735	163.233	299.916	235.203	436.239	1761.1	1535.1	207.491	113.713	109.618	504.735	1127	1	0015075,0051234,0015077,1901293,0009144,0098660,1901137,0009201,0015078,0046390,0003674,0006812,0072521,0009152,0009150,0015985,0046034,0098662,0006807,0009117,0044249,0034654,0055085,0046483,0055086,0009987,0009199,0008150,0006139,0072522,0006796,0019693,0022890,0005575,0017144,0006754,0018130,1901566,0071704,1901135,1901362,1901360,0019438,0022857,0051179,0098800,0090407,0034220,0000276,0009205…
TRINITY_DN1268_c0_g1_i10	ATP synthase subunit gamma, mitochondrial	281.46	179.213	396.419	227.318	166.51	1542.16	1277.86	253.43	116.176	103.085	454.363	1188	1	0015252,0044237,0044238,0046034,0009117,0016887,0009987,0009199,0019693,0018130,1901362,1901360,0034220,0033178,0009205,0009201,0022890,0017111,0032991,0006163,0009165,0006164,1901564,0015399,0022804,0009259,0015075,0015077,0098662,0098660,0015078,0090407,0019637,0019438,0015985,0015986,0022803,0016740,0044281,0072521,0015267,0072522,0005261,0005575,0006753,0006754,1901566,0009260,0008150,1901576…
TRINITY_DN1268_c0_g1_i25	ATP synthase subunit gamma, mitochondrial	0	0	0.382	0.126	459.933	0	0.528	0	0	0	46.0969	1215	1	0015252,0044237,0044238,0046034,0009117,0016887,0009987,0009199,0019693,0018130,1901362,1901360,0034220,0033178,0009205,0009201,0022890,0017111,0032991,0006163,0009165,0006164,1901564,0015399,0022804,0009259,0015075,0015077,0098662,0098660,0015078,0090407,0019637,0019438,0015985,0015986,0022803,0016740,0044281,0072521,0015267,0072522,0005261,0005575,0006753,0006754,1901566,0009260,0008150,1901576…
TRINITY_DN1268_c0_g1_i37	ATP synthase subunit gamma, mitochondrial	0	5.682	4.764	4.419	20.097	10.42	2.841	3.214	5.891	4.597	6.1925	1526	1	0015252,0044237,0044238,0046034,0009117,0016887,0009987,0009199,0019693,0018130,1901362,1901360,0034220,0033178,0009205,0009201,0022890,0017111,0032991,0006163,0009165,0006164,1901564,0015399,0022804,0009259,0015075,0015077,0098662,0098660,0015078,0090407,0019637,0019438,0015985,0015986,0022803,0016740,0044281,0072521,0015267,0072522,0005261,0005575,0006753,0006754,1901566,0009260,0008150,1901576…
TRINITY_DN3319_c1_g1_i1	TRINITY_DN3319_c1_g1_i1	51.397	411.085	40.562	1259.08	171.103	153.711	481.044	1063.26	1826.1	5.125	546.246	239	0
TRINITY_DN713_c0_g1_i3	Crystallin, gamma M1 -like	0	0	0	0	4853.68	0	0	0	0	0	485.368	252	1	0002088,0048856,0008150,0032502
TRINITY_DN713_c0_g1_i2	Crystallin, gamma MX,-like	0	0	0	0	720.905	0	0	0.235	0	0	72.114	454	1	0005212,0050877,0048856,0003674,0003008,0050953,0032502,0032501,0007601,0005198,0002088,0007600,0008150
TRINITY_DN1926_c0_g1_i10	S-arrestin	4.844	0	2.149	0.789	4149.16	1.328	0.227	2.125	2.614	1.439	416.467	903	1	0005737,0001664,0009987,0005102,0003674,0005515,0005575,0050794,0031224,0110165,0016021,0007165,0008150
TRINITY_DN1926_c0_g1_i9	S-arrestin	0	0	0.063	0	628.466	0.064	0.089	0.055	0.627	0	62.9364	1640	1	0005737,0001664,0009987,0005102,0003674,0110165,0050794,0005575,0005515,0007165,0008150
TRINITY_DN1926_c0_g1_i24	TRINITY_DN1926_c0_g1_i24	0.08	0.162	0.986	0.748	318.658	1.08	0	1.051	2.459	0	32.5224	1567	0
TRINITY_DN1926_c0_g1_i20	S-arrestin-like	0	0.218	0.565	0	98.341	0	0	0	0	0.54	9.9664	472	1	0005737,0001664,0009987,0005102,0003674,0110165,0050794,0005575,0005515,0007165,0008150
TRINITY_DN1926_c0_g1_i18	S-arrestin-like	0	0	0	0	68.573	0	0	0	0	0	6.8573	2198	1	0005737,0001664,0009987,0005102,0003674,0110165,0050794,0005575,0005515,0007165,0008150
TRINITY_DN1926_c0_g1_i13	S-arrestin-like	0.198	0.67	0.377	1.05	56.452	0.378	0.598	0.489	0.997	1.818	6.3027	3700	1	0005737,0001664,0005102,0003674,0110165,0005575,0005515
TRINITY_DN1926_c0_g1_i8	MPN domain-containing protein	1.15	9.216	3.808	8.709	1.951	7.766	2.714	8.875	15.98	2.012	6.2181	2487	2	0008234,0006325,0051252,0045893,0009891,0046483,0008237,0004843,0045935,0006366,0140096,0090304,0051171,0019222,0019438,0009893,0006807,0005515,0045944,0044249,1903508,0042393,0080090,0031328,0006357,0031326,0016070,0101005,0031325,0051254,0031323,2001141,1903506,0006139,0010556,0010557,0006351,0034645,2000112,0018130,0009987,0016787,0034654,0070011,0036459,1901362,0051173,1901360,0009889,0006338…
TRINITY_DN1926_c0_g1_i7	Os08g0543275 protein	10.207	10.403	3.642	5.186	0.053	5.278	2.472	7.768	3.624	12.254	6.0887	1721	1
TRINITY_DN2715_c0_g1_i7	Phospholipase A 2	0	0	0	3.895	0	0	0	0	4.309	2764.78	277.299	805	1	0051234,0050482,0009056,0019637,0006820,0016298,0043167,0043169,0004623,0102568,0071715,0004620,0006869,0009987,0015908,0015909,0102567,0110165,0006796,0046942,0005575,0005576,0046903,0016787,0071704,0006793,0051179,0016788,0003824,0044255,1903963,0044237,0044238,0005509,0006811,0008150,0052689,0015849,0016042,1901575,0006629,0015718,0071702,1901571,0015711,0003674,0046717,0046872,0006644,0032309
TRINITY_DN2715_c0_g1_i11	Phospholipase A 2	0	585.141	0	0	0	0	0	0.636	0	0	58.5777	908	1	0051234,0050482,0009056,0019637,0006820,0016298,0043167,0043169,0004623,0102568,0071715,0004620,0006869,0009987,0015908,0015909,0102567,0110165,0006796,0046942,0005575,0005576,0046903,0016787,0071704,0006793,0051179,0016788,0003824,0044255,1903963,0044237,0044238,0005509,0006811,0008150,0052689,0015849,0016042,1901575,0006629,0015718,0071702,1901571,0015711,0003674,0046717,0046872,0006644,0032309
TRINITY_DN2715_c0_g1_i12	phospholipase A2, minor isoenzyme-like	0	0	0	1.089	0	0	0	0	0.893	495.837	49.7819	889	2	0051234,0050482,0009056,0019637,0006820,0016298,0043167,0043169,0004623,0102568,0071715,0004620,0006869,0009987,0015908,0015909,0102567,0110165,0006796,0046942,0005575,0005576,0046903,0016787,0071704,0006793,0051179,0016788,0003824,0044255,1903963,0044237,0044238,0005509,0006811,0008150,0052689,0015849,0016042,1901575,0006629,0015718,0071702,1901571,0015711,0003674,0046717,0046872,0006644,0032309
TRINITY_DN2715_c0_g1_i4	Phospholipase A 2	0	0	0	1.448	0	0	0	0	2.873	262.684	26.7005	968	2	0051234,0050482,0009056,0019637,0006820,0016298,0043167,0043169,0004623,0102568,0071715,0004620,0006869,0009987,0015908,0015909,0102567,0110165,0006796,0046942,0005575,0005576,0046903,0016787,0071704,0006793,0051179,0016788,0003824,0044255,1903963,0044237,0044238,0005509,0006811,0008150,0052689,0015849,0016042,1901575,0006629,0015718,0071702,1901571,0015711,0003674,0046717,0046872,0006644,0032309
TRINITY_DN2715_c0_g1_i1	Phospholipase A 2	0	0	0	0.127	0	0	0	0	0.129	89.292	8.9548	1116	2	0051234,0050482,0009056,0019637,0006820,0016298,0043167,0043169,0004623,0102568,0071715,0004620,0006869,0009987,0015908,0015909,0102567,0110165,0006796,0046942,0005575,0005576,0046903,0016787,0071704,0006793,0051179,0016788,0003824,0044255,1903963,0044237,0044238,0005509,0006811,0008150,0052689,0015849,0016042,1901575,0006629,0015718,0071702,1901571,0015711,0003674,0046717,0046872,0006644,0032309
TRINITY_DN2715_c0_g1_i9	Phospholipase A 2	0	59.803	0	0.131	0.828	0.127	0	2.853	0	1.233	6.4975	667	1	0051234,0050482,0009056,0019637,0006820,0016298,0043167,0043169,0004623,0102568,0071715,0004620,0006869,0009987,0015908,0015909,0102567,0110165,0006796,0046942,0005575,0005576,0046903,0016787,0071704,0006793,0051179,0016788,0003824,0044255,1903963,0044237,0044238,0005509,0006811,0008150,0052689,0015849,0016042,1901575,0006629,0015718,0071702,1901571,0015711,0003674,0046717,0046872,0006644,0032309
TRINITY_DN2715_c0_g1_i10	phospholipase A2, minor isoenzyme-like	0	0.276	0	0	0	0	0	0	0	38.656	3.8932	1037	2	0051234,0050482,0009056,0019637,0006820,0016298,0043167,0043169,0004623,0071715,0004620,0006869,0009987,0015908,0015909,0110165,0006796,0046942,0005575,0005576,0046903,0016787,0071704,0006793,0051179,0016788,0003824,0044255,1903963,0044237,0044238,0005509,0006811,0008150,0052689,0015849,0016042,1901575,0006629,0015718,0071702,1901571,0015711,0003674,0046717,0046872,0006644,0032309
TRINITY_DN2715_c0_g1_i13	Phospholipase A 2	35.5	0	0	0	0	0	0	0.414	0.082	0	3.5996	882	1	0051234,0050482,0009056,0019637,0006820,0016298,0043167,0043169,0004623,0102568,0071715,0004620,0006869,0009987,0015908,0015909,0102567,0110165,0006796,0046942,0005575,0005576,0046903,0016787,0071704,0006793,0051179,0016788,0003824,0044255,1903963,0044237,0044238,0005509,0006811,0008150,0052689,0015849,0016042,1901575,0006629,0015718,0071702,1901571,0015711,0003674,0046717,0046872,0006644,0032309
TRINITY_DN2715_c0_g1_i8	phospholipase A2-like	0	0	0	0	0	0	0	0	0	19.009	1.9009	1032	1
TRINITY_DN49_c1_g1_i6	sodium/potassium-transporting ATPase subunit gamma-like	0	2336.55	1.409	2688.78	0.36	2.907	0	0.989	11.672	4.037	504.67	382	1
TRINITY_DN13040_c1_g1_i1	Eukaryotic translation elongation factor 1 gamma	157.96	127.42	178.187	180.727	99.06	330.284	568.289	320.339	197.088	599.985	275.934	2570	2	0097159,0044260,0044249,0005737,0003746,0009987,0003723,0110165,0005575,0005634,0043231,1901576,1901363,0090079,0044237,0008150,0043170,0071704,0009059,0009058,0034645,0008135,0045182,0003674,0003676,0043229,0006414,0043226,0043227
TRINITY_DN13040_c1_g1_i5	Eukaryotic translation elongation factor 1 gamma	73.998	76.07	104.028	92.428	59.245	200.233	241.708	124.992	141.193	249.98	136.387	2876	1	0097159,0044260,0044249,0005737,0003746,0009987,0003723,0110165,0005575,0005634,0043231,1901576,1901363,0090079,0044237,0008150,0043170,0071704,0009059,0009058,0034645,0008135,0045182,0003674,0003676,0043229,0006414,0043226,0043227
TRINITY_DN13040_c1_g1_i15	Eukaryotic translation elongation factor 1 gamma	77.795	23.533	34.931	15.987	23.607	24.202	145.367	92.972	21.309	216.796	67.6499	3284	2	0016209,0097159,0051920,0110165,0044249,0005737,0003746,0009987,0003723,0016491,0044260,0005575,0005634,0043231,1901576,1901363,0016684,0090079,0003824,0044237,0008150,0043170,0071704,0009059,0009058,0045182,0008135,0034645,0003674,0003676,0043229,0006414,0043226,0043227
TRINITY_DN1324_c1_g4_i1	Tributyltin binding protein type 2	0	0	105.66	0	0	0	0	0.08	0.317	4100.05	420.61	906	1
TRINITY_DN1324_c1_g4_i2	Tributyltin binding protein type 2	0.07	0	0	0.1	0	0	0	0	0	58.436	5.8606	807	1
TRINITY_DN3444_c0_g1_i43	histidine-rich glycoprotein-like	0.048	0.065	0	0	0	0	0	0.063	0	2158.42	215.859	1087	1	0002020,0009892,0003674,0030414,0070011,0061134,0004866,0019222,0051336,0006807,0044260,0019899,0080090,0044267,0009987,0045861,0030162,0005515,0006508,0004175,0031323,0140096,0048523,0016787,0098772,0051248,0051171,0051246,0051172,0044092,0004857,0051346,0003824,0050790,0008233,0010605,0050794,0044237,0044238,0010951,0052548,0008150,0043170,0071704,0019538,0030234,0032268,0061135,1901564,0010466…
TRINITY_DN3444_c0_g1_i3	histidine-rich glycoprotein-like	0	0	0.171	0	0	0	0	0	0	1260.94	126.111	1639	2	0002020,0009892,0003674,0030414,0070011,0061134,0004866,0019222,0051336,0006807,0044260,0019899,0080090,0044267,0009987,0045861,0030162,0005515,0006508,0004175,0031323,0140096,0048523,0016787,0098772,0051248,0051171,0051246,0051172,0044092,0004857,0051346,0003824,0050790,0008233,0010605,0050794,0044237,0044238,0010951,0052548,0008150,0043170,0071704,0019538,0030234,0032268,0061135,1901564,0010466…
TRINITY_DN3444_c0_g1_i14	antihemorrhagic factor cHLP-B-like	0	0	0	0.045	0.073	0.023	0	0	0.032	277.303	27.7476	2792	3	0002020,0009892,0003674,0030414,0070011,0061134,0004866,0019222,0051336,0006807,0044260,0019899,0080090,0044267,0009987,0045861,0030162,0005515,0006508,0004175,0031323,0140096,0048523,0016787,0098772,0051248,0051171,0051246,0051172,0044092,0004857,0051346,0003824,0050790,0008233,0010605,0050794,0044237,0044238,0010951,0052548,0008150,0043170,0071704,0019538,0030234,0032268,0061135,1901564,0010466…
TRINITY_DN3444_c0_g1_i32	antihemorrhagic factor cHLP-B-like	0	0	0	0	0	0	0	0	0	238.584	23.8584	2864	3	0002020,0009892,0003674,0030414,0070011,0061134,0004866,0019222,0051336,0006807,0044260,0019899,0080090,0044267,0009987,0045861,0030162,0005515,0006508,0004175,0031323,0140096,0048523,0016787,0098772,0051248,0051171,0051246,0051172,0044092,0004857,0051346,0003824,0050790,0008233,0010605,0050794,0044237,0044238,0010951,0052548,0008150,0043170,0071704,0019538,0030234,0032268,0061135,1901564,0010466…
TRINITY_DN3444_c0_g1_i27	histidine-rich glycoprotein-like	0	0	0	0	0.039	0	0	0	0	160.337	16.0376	3387	5	0004869,0002020,0009892,0003674,0030414,0070011,0061134,0004866,0019222,0051336,0006807,0044260,0019899,0080090,0044267,0009987,0045861,0030162,0005515,0006508,0004175,0031323,0140096,0048523,0016787,0098772,0051248,0051171,0051246,0051172,0044092,0004857,0051346,0003824,0050790,0008233,0010605,0050794,0044237,0044238,0010951,0052548,0008150,0043170,0071704,0019538,0030234,0032268,0061135,1901564…
TRINITY_DN3444_c0_g1_i70	histidine-rich glycoprotein-like	0	0	0	0	0	0	0	0	0	81.987	8.1987	1159	1	0002020,0009892,0003674,0030414,0070011,0061134,0004866,0019222,0051336,0006807,0044260,0019899,0080090,0044267,0009987,0045861,0030162,0005515,0006508,0004175,0031323,0140096,0048523,0016787,0098772,0051248,0051171,0051246,0051172,0044092,0004857,0051346,0003824,0050790,0008233,0010605,0050794,0044237,0044238,0010951,0052548,0008150,0043170,0071704,0019538,0030234,0032268,0061135,1901564,0010466…
TRINITY_DN3444_c0_g1_i6	histidine-rich glycoprotein-like	0	0	0	0	0	0	0	0	0	27.486	2.7486	3742	6	0004869,0002020,0009892,0003674,0030414,0070011,0061134,0004866,0019222,0051336,0006807,0044260,0019899,0080090,0044267,0009987,0045861,0030162,0005515,0006508,0004175,0031323,0140096,0048523,0016787,0098772,0051248,0051171,0051246,0051172,0044092,0004857,0051346,0003824,0050790,0008233,0010605,0050794,0044237,0044238,0010951,0052548,0008150,0043170,0071704,0019538,0030234,0032268,0061135,1901564…
TRINITY_DN3444_c0_g1_i52	histidine-rich glycoprotein-like	0	0	0	0	0	0	0	0	0.322	23.611	2.3933	1497	1	0002020,0009892,0003674,0030414,0070011,0061134,0004866,0019222,0051336,0006807,0044260,0019899,0080090,0044267,0009987,0045861,0030162,0005515,0006508,0004175,0031323,0140096,0048523,0016787,0098772,0051248,0051171,0051246,0051172,0044092,0004857,0051346,0003824,0050790,0008233,0010605,0050794,0044237,0044238,0010951,0052548,0008150,0043170,0071704,0019538,0030234,0032268,0061135,1901564,0010466…
TRINITY_DN67_c2_g2_i9	profilin-2-like	91.804	498.931	45.502	837.05	75.337	166.993	292.284	1348.62	1488.63	28.403	487.356	670	1	0003779,0051493,0051258,0110053,0033043,0051128,0043933,0008064,0110165,0032271,1902903,0032535,0005737,0009987,0097435,0090066,0005515,0044087,0005575,0030833,0030832,0008092,0032956,0032970,0043254,0065008,0050794,0008154,0008150,0007015,0030041,0065003,0003674,0016043,0034622,0022607,0071840
TRINITY_DN67_c2_g2_i6	profilin-2-like	0	17.618	1.526	45.344	8.538	18.617	15.841	54.307	126.734	0.441	28.8966	772	1	0003779,0051493,0051258,0110053,0033043,0051128,0043933,0008064,0110165,0032271,1902903,0032535,0005737,0009987,0097435,0090066,0005515,0044087,0005575,0030833,0030832,0008092,0032956,0032970,0043254,0065008,0050794,0008154,0008150,0007015,0030041,0065003,0003674,0016043,0034622,0022607,0071840
TRINITY_DN67_c2_g2_i8	profilin-2-like	0.023	11.451	1.067	8.823	2.447	4.445	3.166	9.77	28.55	0.807	7.0549	2141	2	0003779,0051493,0051258,0110053,0033043,0051128,0043933,0008064,0110165,0032271,1902903,0032535,0005737,0009987,0097435,0090066,0005515,0044087,0005575,0030833,0030832,0008092,0032956,0032970,0043254,0065008,0050794,0008154,0008150,0007015,0030041,0065003,0003674,0016043,0034622,0022607,0071840
TRINITY_DN67_c2_g2_i4	Profilin	0.037	8.36	0.668	9.7	1.476	3.931	1.841	8.947	21.172	0.913	5.7045	1470	1	0003779,0051493,0051258,0110053,0033043,0051128,0043933,0008064,0110165,0032271,1902903,0032535,0005737,0009987,0097435,0090066,0005515,0044087,0005575,0030833,0030832,0034622,0032956,0032970,0043254,0065008,0050794,0008154,0008150,0007015,0030041,0065003,0003674,0016043,0008092,0022607,0071840
TRINITY_DN6551_c0_g1_i14	induced myeloid leukemia cell differentiation protein Mcl-1 -like	263.519	302.209	79.207	294.345	93.561	221.642	2044.14	732.86	495.018	109.198	463.57	1873	1	0098588,0006974,0043066,0046983,0097190,0097193,0010941,0005515,0008630,0043069,0060548,0009987,0110165,0031090,0005575,0007165,0048523,0031968,0031966,0050794,0016020,0008150,0005741,0035556,0042803,0042802,0003674,0043067,0042981,0019867
TRINITY_DN6551_c0_g1_i11	MCL1 apoptosis regulator, BCL2 family member b	0.208	7.322	1.75	6.077	0.979	4.353	2.43	20.884	3.608	1.542	4.9153	2269	3	0098588,0006974,0043066,0046983,0097190,0097193,0010941,0005515,0008630,0043069,0060548,0009987,0110165,0031090,0005575,0007165,0048523,0031968,0031966,0050794,0031224,0016020,0016021,0008150,0005741,0035556,0042803,0042802,0003674,0043067,0042981,0019867
TRINITY_DN1855_c5_g1_i43	putative leucine-rich repeat-containing protein DDB G0290503	0	1.027	0	0	0	0	0	0	0	2360.62	236.165	2782	1	0009897,0098552,0002376,0005102,0008150,0003674,0006955,0110165,0001817,0001816,0032501,0005575,0005515,0050776,0051239,0002682,0097478,0005623
TRINITY_DN1855_c5_g1_i31	putative leucine-rich repeat-containing protein DDB G0290503	0	1.961	0.041	0	0	0	0	0	0.111	960.277	96.239	2191	1
TRINITY_DN1855_c5_g1_i39	golgin subfamily B member 1-like	0	0.546	0	0	0	0	0	0	0	686.37	68.6916	1659	1
TRINITY_DN1855_c5_g1_i51	cingulin-like	0	0.16	0	0	0	0	0	0	0	53.695	5.3855	791	1
TRINITY_DN1855_c5_g1_i7	putative leucine-rich repeat-containing protein DDB G0290503	0	0.103	0	0	0	0	0	0	0	33.48	3.3583	1890	1
TRINITY_DN1855_c5_g1_i41	putative leucine-rich repeat-containing protein DDB G0290503	0	0	0	0.152	0	0.092	0.044	0	0	32.742	3.303	2122	1
TRINITY_DN1855_c5_g1_i28	putative leucine-rich repeat-containing protein DDB G0290503	0	0	0.157	0	0.036	0	0	0	0	20.429	2.0622	3723	3
TRINITY_DN1855_c5_g1_i45	putative leucine-rich repeat-containing protein DDB G0290503	0	0	0	0	0	0	0	0	0	17.801	1.7801	3724	2
TRINITY_DN1855_c5_g1_i52	putative leucine-rich repeat-containing protein DDB G0290503	0	0.077	0	0	0	0	0	0	0	14.252	1.4329	2925	2	0009897,0098552,0002376,0005102,0008150,0003674,0006955,0110165,0001817,0001816,0032501,0005575,0005515,0050776,0051239,0002682,0097478,0005623
TRINITY_DN311_c0_g2_i2	Crystallin, gamma M6	0	0	0	0	5250.22	0	0	0	0	0	525.022	717	1
TRINITY_DN311_c0_g2_i1	Crystallin, gamma M6	0	0	0.208	0	35.047	0	0	0	0	0	3.5255	684	1	0002088,0048856,0008150,0032502
TRINITY_DN655_c0_g1_i7	beta-galactoside-binding lectin-like	0	3763.42	3.564	812.212	1.244	0.569	0	1.141	5.382	25.733	461.326	616	1	0062023,0030246,0003674,0031012,0110165,0005575,0005615
TRINITY_DN655_c0_g1_i2	beta-galactoside-binding lectin-like	0	63.948	0.131	9.539	0	0	0.695	0.163	0.672	1.019	7.6167	830	2	0062023,0030246,0003674,0031012,0110165,0005575,0005615
TRINITY_DN655_c0_g1_i6	beta-galactoside-binding lectin-like	0	19.167	0	3.266	0	0	0	0	0	0.383	2.2816	1472	2	0062023,0030246,0003674,0031012,0110165,0005575,0005615
TRINITY_DN8618_c0_g1_i3	fast skeletal muscle troponin T	3.299	0	0.11	0	2.121	0.389	4059.67	10.238	0	0.316	407.615	656	1	0003012,0005509,0006936,0006941,0060048,0003008,0003674,0032501,0043167,0043169,0046872,0003009,0008150
TRINITY_DN2473_c0_g1_i7	Putative dual specificity protein phosphatase 22-A-like	232.931	390.068	602.567	311.679	1010.51	907.388	594.952	216.589	193.988	132.609	459.328	743	1	0015075,0015077,0016791,0042578,0044237,0015078,0009060,0045333,0015980,0009987,0006091,0140096,0016491,0110165,0015002,0005575,0016787,0055114,0022857,0016788,0003824,0019646,0031224,0022890,0016021,0008150,0006123,0016676,0016675,0008138,0008324,0003674,0009055,0004129,0022900,0004725,0022904,0004721
TRINITY_DN2473_c0_g1_i2	Putative dual specificity protein phosphatase 22-A-like	19.714	11.028	29.112	4.825	71.897	11.109	10.042	5.396	2.963	2.66	16.8746	845	1	0015075,0015077,0016791,0042578,0044237,0015078,0009060,0045333,0015980,0009987,0006091,0140096,0016491,0110165,0015002,0005575,0016787,0055114,0022857,0016788,0003824,0019646,0031224,0022890,0016021,0008150,0006123,0016676,0016675,0008138,0008324,0003674,0009055,0004129,0022900,0004725,0022904,0004721
TRINITY_DN2473_c0_g1_i8	Putative dual specificity protein phosphatase 22-A-like	0	9.163	9.634	12.064	31.833	37.946	4.81	18.069	9.342	0	13.2861	741	1	0015075,0015077,0016791,0042578,0044237,0015078,0009060,0045333,0015980,0009987,0006091,0140096,0016491,0110165,0015002,0005575,0016787,0055114,0022857,0016788,0003824,0019646,0031224,0022890,0016021,0008150,0006123,0016676,0016675,0008138,0008324,0003674,0009055,0004129,0022900,0004725,0022904,0004721
TRINITY_DN420_c9_g2_i3	tyrosine-protein kinase receptor ver-3-like	2.775	1590.54	105.125	616.195	55.326	475.55	179.326	596.036	708.789	400.687	473.034	1516	1
TRINITY_DN420_c9_g2_i4	tyrosine-protein kinase receptor ver-3-like	0	14.16	0.453	12.35	1.745	7.305	1.751	9.992	13.8	3.483	6.5039	1465	1
TRINITY_DN460_c0_g1_i5	cathepsin Z-like	3609.14	0	0.497	0.224	0.159	51.59	1.195	34.661	0	0	369.747	999	1	0005615,0051603,0006807,0004197,0005773,0140096,0110165,0006508,0004175,0005575,0043231,1901564,0016787,0070011,0003824,0008233,0008234,0044238,0008150,0043170,0071704,0005764,0003674,0043229,0000323,0019538,0043226,0043227
TRINITY_DN460_c0_g1_i3	cathepsin Z	89.708	274.884	68.231	359.782	30.177	86.453	37.439	141.385	448.43	68.37	160.486	1750	1	0005615,0051603,0006807,0004197,0005773,0140096,0110165,0006508,0004175,0005575,0043231,1901564,0016787,0070011,0003824,0008233,0008234,0044238,0008150,0043170,0071704,0005764,0003674,0043229,0000323,0019538,0043226,0043227
TRINITY_DN6815_c0_g1_i3	hypothetical protein	2232.64	0	0.054	0	0	0.849	0.086	26.313	0	0	225.994	1478	1
TRINITY_DN6815_c0_g1_i10	hypothetical protein	2046.82	0	0.182	0.759	0.358	2.202	0.475	33.907	0.236	0	208.494	912	1
TRINITY_DN6815_c0_g1_i9	TRINITY_DN6815_c0_g1_i9	1007.33	0	0	0.543	0	0	1.508	15.576	0	0	102.496	434	0
TRINITY_DN6815_c0_g1_i5	hypothetical protein	11.106	0	0	0	0	0	0	0	0	0.564	1.167	709	1
TRINITY_DN6815_c0_g1_i16	hypothetical protein	11.356	0	0	0	0	0	0	0	0	0	1.1356	1498	1
TRINITY_DN807_c0_g1_i8	Pancreatic progenitor cell differentiation and proliferation factor b	509.28	132.509	645.884	259.665	268.006	565.315	579.845	736.365	424.272	604.697	472.584	990	1	0048869,0009987,0048856,0032501,0032502,0030154,0007275,0008150
TRINITY_DN807_c0_g1_i3	pancreatic progenitor cell differentiation and proliferation factor	0.252	1.453	1.246	1.452	1.515	2.239	2.055	12.392	2.921	8.321	3.3846	1698	2	0048869,0009987,0048856,0032501,0032502,0030154,0007275,0008150
TRINITY_DN1312_c9_g1_i2	myosin heavy chain 7 -related	0	0	0	0	0	4549.22	17.071	1.729	0	0	456.802	442	1	0016818,0016817,0030554,0051015,0097159,0043167,0097367,0043168,0032553,0008144,1901265,0032559,0032555,0005515,0016459,0000166,0005575,0044877,0016787,1901363,0003824,0003774,0003779,0016462,0017111,0032991,0005524,0003674,0035639,0008092,0017076,0036094
TRINITY_DN1312_c9_g1_i1	myosin heavy chain 7 -related	0	0	0	0	0	53.953	0	0	0	0	5.3953	276	0
TRINITY_DN1312_c9_g1_i3	MYH7	0	0	0	0	0	11.658	0	0	0	0	1.1658	520	2	0008092,0050794,0051493,0009987,0003674,0033043,0110165,0071840,0005815,0051128,0005575,0006996,0005515,0008150,0007010,0016043
TRINITY_DN692_c0_g5_i1	myosin-1B	0	0	0	0	0.859	0	3906.38	2.333	0	0	390.957	504	1
TRINITY_DN237_c0_g1_i1	Putative DNA-binding protein RFX5	260.055	364.61	299.789	392.059	283.521	576.099	1452.16	402.33	269.495	190.163	449.029	924	1	0051252,0070003,0043226,0031323,0043161,0043227,0010498,0019222,0051603,1903506,0006807,0044260,0005737,0080090,0006357,0031326,0003700,0044265,0003674,0030163,0140096,2001141,0110165,0006355,0004175,0043229,0004298,2000112,0005634,0043231,1901564,0051171,0016787,0070011,1901363,1901575,0044248,0009889,0003824,0043632,0050794,0044237,0044238,0005575,0005839,0008150,0043170,0071704,0019219,0097159…
TRINITY_DN1565_c0_g1_i50	tropomyosin alpha-3 chain	0.575	0.925	5.643	0.775	12.956	613.664	3272.59	51.132	0.384	0	395.864	872	1	0051015,0005515,0006936,0099081,0099080,0009987,0097435,0110165,0044877,0005575,0003012,0099513,0099512,0032501,0003779,0008150,0005884,0007015,0003674,0003008,0016043,0008092,0071840
TRINITY_DN1565_c0_g1_i56	tropomyosin alpha-4 chain	0.059	1.512	0.596	0.627	0.622	0.683	22.533	0.512	2.384	0	2.9528	3046	4	0051015,0005515,0006936,0099081,0099080,0009987,0097435,0110165,0044877,0005575,0003012,0099513,0099512,0032501,0003779,0008150,0005884,0007015,0003674,0003008,0016043,0008092,0071840
TRINITY_DN1565_c0_g1_i31	tropomyosin beta chain	0.05	1.062	0.488	0.593	1.154	1.073	15.205	0.194	1.24	0.173	2.1232	3413	4	0051015,0005515,0006936,0099081,0099080,0009987,0097435,0110165,0044877,0005575,0003012,0099513,0099512,0032501,0003779,0008150,0005884,0007015,0003674,0003008,0016043,0008092,0071840
TRINITY_DN280_c0_g2_i12	Myosin-7B	0	0.019	0.066	0	1.452	2042.31	28.143	0.863	0	0	207.286	3160	1
TRINITY_DN280_c0_g2_i2	myosin-4	0	0	0	0	0.182	0.077	1032.88	0.75	0	0	103.389	5553	1
TRINITY_DN280_c0_g2_i4	myosin-1B	0	0	0	0	0	0	511.923	2.504	0	0	51.4427	1598	1
TRINITY_DN280_c0_g2_i6	myosin heavy chain 7 -related	0	0	0	0	0	125.718	9.667	0	0	0	13.5385	2294	1
TRINITY_DN280_c0_g2_i7	myosin heavy chain 7 -related	0	0	0	0	0	0	121.731	1.168	0	0	12.2899	2250	1
TRINITY_DN280_c0_g2_i8	myosin-4	0.008	0	0	0.023	0	0	105.98	5.631	0.022	0	11.1664	5177	1
TRINITY_DN280_c0_g2_i3	myosin heavy chain 7 -related	0	0	0	0	0	87.763	0.85	0	0	0	8.8613	2955	2	0016818,0016817,0030554,0051015,0097159,0043167,0097367,0043168,0032553,0008144,1901265,0032559,0032555,0005515,0016459,0000166,0005575,0044877,0016787,1901363,0003824,0003774,0003779,0016462,0017111,0032991,0005524,0003674,0035639,0008092,0017076,0036094
TRINITY_DN280_c0_g2_i1	myosin-4	0	0	0	0	0	0	64.373	0.843	0	0	6.5216	2361	1
TRINITY_DN280_c0_g2_i10	myosin heavy chain 7 -related	0	0	0	0	0	46.99	0	0	0	0	4.699	3066	2	0016818,0016817,0030554,0051015,0097159,0043167,0097367,0043168,0032553,0008144,1901265,0032559,0032555,0005515,0016459,0000166,0005575,0044877,0016787,1901363,0003824,0003774,0003779,0016462,0017111,0032991,0005524,0003674,0035639,0008092,0017076,0036094
TRINITY_DN280_c0_g2_i5	myosin heavy chain 7 -related	0	0	0	0	0	45.912	0	0	0	0	4.5912	2405	1
TRINITY_DN2158_c0_g1_i22	titin-like	0.026	0.036	0.123	0.037	4.62	1293.92	1123.03	10.432	0	0	243.222	1799	1	0003824,0016740,0016772,0016773,0048856,0016301,0140096,0003674,0048731,0032502,0072358,0008150,0004672
TRINITY_DN2158_c0_g1_i3	titin-like	0	0	0.062	0.036	2.758	509.495	782.384	6.445	0.135	0	130.131	1840	1	0003824,0016740,0016772,0016773,0048856,0016301,0140096,0003674,0048731,0032502,0072358,0008150,0004672
TRINITY_DN2158_c0_g1_i18	titin-like	0.01	0	0.007	0	0.077	59.512	58.107	0.355	0	0.017	11.8085	16246	2	0006325,0051252,0007416,0010468,0003674,0090304,2001141,0018393,0019222,0019438,1903506,0034330,0005515,0006807,0018394,0061733,0044249,0034654,0043412,0016747,0016746,0046483,0044267,0016070,0009987,0031323,0043967,0044260,0006139,0010556,0006351,0016569,0016410,2000112,0003682,0034212,1901564,0018130,0006464,0043543,1901576,0051171,1901362,1901360,0008080,0006473,0009889,0006338,0003824,0050808…
TRINITY_DN2158_c0_g1_i12	titin-like	0	0	0.022	0	0.085	46.22	47.277	0	0	0	9.3604	8335	1	0007411,0097435,0043005,0018105,0051015,0044260,0008150,0005515,0006807,0018193,0006796,0043412,0006936,0044267,0009987,0009986,0005516,0140096,0110165,0042995,0006468,0044877,0006793,0016310,0005575,0003012,0007165,1901564,0006464,0031672,0005634,0030424,0003824,0032501,0016740,0050794,0044237,0044238,0003779,0097485,0030018,0043170,0071704,0043231,0035556,0018209,0016772,0016773,0006941,0003674…
TRINITY_DN2158_c0_g1_i14	titin-like	0	0	0	0	0	40.364	45.131	0.866	0	0	8.6361	8376	1	0007411,0097435,0043005,0018105,0051015,0044260,0008150,0005515,0006807,0018193,0006796,0043412,0006936,0044267,0009987,0009986,0005516,0140096,0110165,0042995,0006468,0044877,0006793,0016310,0005575,0003012,0007165,1901564,0006464,0031672,0005634,0030424,0003824,0032501,0016740,0050794,0044237,0044238,0003779,0097485,0030018,0043170,0071704,0043231,0035556,0018209,0016772,0016773,0006941,0003674…
TRINITY_DN2158_c0_g1_i6	titin-like	0	0	0	0	0	38.085	47.025	0.439	0	0	8.5549	16309	2	0007416,0009987,0016043,0050808,0034329,0034330,0022607,0008150,0071840
TRINITY_DN2158_c0_g1_i5	titin-like	0	0	0	0	0	3.308	31.315	0	0	0	3.4623	7987	1	0007411,0043005,0006468,0051015,0008150,0005515,0006807,0044260,0043412,0006936,0044267,0009987,0097435,0140096,0110165,0042995,0006796,0044877,0006793,0016310,0005575,0003012,0007165,1901564,0006464,0031672,0005634,0030424,0003824,0032501,0016740,0050794,0044237,0044238,0003779,0097485,0030018,0043170,0071704,0043231,0035556,0016772,0019538,0006941,0003674,0003008,0016043,0007015,0036211,0043229…
TRINITY_DN2158_c0_g1_i21	titin-like	0	0	0	0	0	1.855	29.878	0.324	0	0	3.2057	8028	1	0007411,0043005,0006468,0051015,0008150,0005515,0006807,0044260,0043412,0006936,0044267,0009987,0097435,0140096,0110165,0042995,0006796,0044877,0006793,0016310,0005575,0003012,0007165,1901564,0006464,0031672,0005634,0030424,0003824,0032501,0016740,0050794,0044237,0044238,0003779,0097485,0030018,0043170,0071704,0043231,0035556,0016772,0019538,0006941,0003674,0003008,0016043,0007015,0036211,0043229…
TRINITY_DN906_c10_g1_i2	calcium-binding protein P-like	5156.96	0.354	0.616	0.382	0.786	0	3.319	58.765	0	0	522.118	366	1
TRINITY_DN2339_c0_g1_i25	Hepcidin 1	0.17	0	0	0	0	0	0	0	0.049	1600.14	160.036	1332	1	0055065,0042592,0055080,0055082,0009987,0110165,0005575,0005576,0048878,0098771,0055072,0055076,0065008,0050801,0008150,0006879,0030003,0006875,0006873,0019725,0046916,0005623
TRINITY_DN2339_c0_g1_i24	Hepcidin	1.283	0	0	0	0	0	0	0.331	0	878.014	87.9628	555	1	0055065,0042592,0055080,0055082,0009987,0110165,0005575,0005576,0048878,0098771,0055072,0055076,0065008,0050801,0008150,0006879,0030003,0006875,0006873,0019725,0046916,0005623
TRINITY_DN2339_c0_g1_i4	Hepcidin	0.26	0	0	0	0	0	0	0.164	0	523.742	52.4166	555	1	0055065,0042592,0055080,0055082,0009987,0110165,0005575,0005576,0048878,0098771,0055072,0055076,0065008,0050801,0008150,0006879,0030003,0006875,0006873,0019725,0046916,0005623
TRINITY_DN2339_c0_g1_i12	Hepcidin	0.969	0.347	0.15	0	0	0	0	0	0	499.627	50.1093	539	1	0055065,0042592,0055080,0055082,0009987,0110165,0005575,0005576,0048878,0098771,0055072,0055076,0065008,0050801,0008150,0006879,0030003,0006875,0006873,0019725,0046916,0005623
TRINITY_DN2339_c0_g1_i29	Hepcidin	0.039	0	0	0	0	0	0	0	0.04	155.454	15.5533	1597	2	0055065,0042592,0055080,0055082,0009987,0110165,0005575,0005576,0048878,0098771,0055072,0055076,0065008,0050801,0008150,0006879,0030003,0006875,0006873,0019725,0046916,0005623
TRINITY_DN2339_c0_g1_i23	Hepcidin	0.092	0	0	0.083	0	0	0	0	0	120.246	12.0421	925	1	0055065,0042592,0055080,0055082,0009987,0110165,0005575,0005576,0048878,0098771,0055072,0055076,0065008,0050801,0008150,0006879,0030003,0006875,0006873,0019725,0046916,0005623
TRINITY_DN2339_c0_g1_i36	Hepcidin	0.074	0	0.037	0	0	0	0	0	0	42.623	4.2734	1522	2	0055065,0042592,0055080,0055082,0009987,0110165,0005575,0005576,0048878,0098771,0055072,0055076,0065008,0050801,0008150,0006879,0030003,0006875,0006873,0019725,0046916,0005623
TRINITY_DN2339_c0_g1_i20	Hepcidin	0	0	0	0	0	0	0	0	0	30.897	3.0897	381	1	0055065,0042592,0055080,0055082,0009987,0110165,0005575,0005576,0048878,0098771,0055072,0055076,0065008,0050801,0008150,0006879,0030003,0006875,0006873,0019725,0046916,0005623
TRINITY_DN2339_c0_g1_i17	Hepcidin	0	0	0	0	0	0	0	0	0	18.488	1.8488	922	1	0055065,0042592,0055080,0055082,0009987,0110165,0005575,0005576,0048878,0098771,0055072,0055076,0065008,0050801,0008150,0006879,0030003,0006875,0006873,0019725,0046916,0005623
TRINITY_DN1893_c1_g1_i4	glutathione peroxidase 3	0.099	4.391	204.044	2.49	23.737	1550.92	63.615	7.331	1.93	2002.15	386.07	1032	2	0055114,0016684,0016209,0004601,0003674,0016491,0004602,0003824,0006979,0008150
TRINITY_DN1893_c1_g1_i6	glutathione peroxidase 3	0.108	0	0.657	0	0.336	77.858	0.469	0	0	33.123	11.2551	1005	2	0055114,0016684,0016209,0004601,0003674,0016491,0004602,0003824,0006979,0008150
TRINITY_DN1893_c1_g1_i1	TRINITY_DN1893_c1_g1_i1	0	0	0	0	1.791	48.709	0	0	0	42.466	9.2966	211	0
TRINITY_DN1893_c1_g1_i3	Glutathione peroxidase	0	0.102	1.344	0.402	0.819	34.131	1.226	0	0	29.97	6.7994	1129	1	0055114,0016684,0016209,0004601,0003674,0016491,0004602,0003824,0006979,0008150
TRINITY_DN1893_c1_g1_i2	glutathione peroxidase 3	0	0.103	0.8	0	0	11.115	0	0.102	0.12	23.689	3.5929	778	2	0055114,0016684,0016209,0004601,0003674,0016491,0004602,0003824,0006979,0008150
TRINITY_DN3781_c1_g1_i1	cytochrome b-c1 complex subunit Rieske, mitochondrial-like	173.204	125.639	232.445	129.952	326.2	1518.79	1551.97	122.903	88.221	53.056	432.239	938	1	0005886,0055114,0003674,0016491,0110165,0003824,0005575,0016020,0008150,0005623
TRINITY_DN12562_c0_g2_i2	TRINITY_DN12562_c0_g2_i2	0	1.785	0	0	0	0	0	0	0	3808.93	381.072	251	0
TRINITY_DN12562_c0_g2_i1	vitelline membrane outer layer protein 1 -like	0	0	0	0	0	0	0	0	0	53.532	5.3532	364	1
TRINITY_DN858_c2_g1_i3	BnaA05g14930D protein	0.821	0.559	819.927	46.778	2421.4	4	24	3.015	63.356	26.523	341.038	721	0
TRINITY_DN858_c2_g1_i11	TRINITY_DN858_c2_g1_i11	0	0	190.797	8.739	736.901	0.566	19.188	0.729	11.713	5.428	97.4061	487	0
TRINITY_DN858_c2_g1_i4	TRINITY_DN858_c2_g1_i4	0.228	0	143.754	4.971	406.695	0	0	0.413	9.786	6.899	57.2746	392	0
TRINITY_DN1493_c0_g1_i3	tubulin alpha-1C chain	534.373	45.944	613.571	0	341.186	65.47	42.216	79.907	62.51	2.126	178.73	1724	1	0140014,0003674,0097159,0043167,0006996,0019001,0043168,0001883,0000226,0000166,0005737,0099081,0032555,0009987,0032550,0001882,1901265,0005575,0097367,0099512,1901363,0005874,0032553,0110165,0008150,0005525,0032549,0032561,0099513,0007017,0007010,0016043,0035639,0048285,0099080,0017076,0036094,0000280,0071840
TRINITY_DN1493_c0_g1_i15	tubulin alpha chain	127.285	6.361	454.098	0	181.691	132.54	23.458	12.815	40.185	8.058	98.6491	1912	1	0140014,0003674,0097159,0043167,0006996,0019001,0043168,0001883,0000226,0000166,0005737,0099081,0032555,0009987,0032550,0001882,1901265,0005575,0097367,0099512,1901363,0005874,0032553,0110165,0008150,0005525,0032549,0032561,0099513,0007017,0007010,0016043,0035639,0048285,0099080,0017076,0036094,0000280,0071840
TRINITY_DN1493_c0_g1_i22	tubulin alpha chain	105.715	49.686	17.201	62.314	10.626	100.343	112.935	68.972	51.929	7.233	58.6954	1247	1	0016818,0140014,0016817,0007010,0097159,0043167,0043168,0019001,0097367,0001883,0000226,0000166,0005737,0005200,0099081,0099080,0009987,0032550,0001882,1901265,0005575,0099513,0099512,0016787,1901363,0005874,0003824,0003924,0110165,0008150,0016462,0017111,0005525,0032549,0032561,0007017,0003674,0032553,0016043,0035639,0048285,0005198,0032555,0017076,0036094,0071840,0000280,0006996
TRINITY_DN1493_c0_g1_i8	tubulin alpha chain	133.075	19.651	49.909	0	56.432	51.032	62.005	43.996	27.887	6.615	45.0602	1749	1	0140014,0003674,0097159,0043167,0006996,0019001,0043168,0001883,0000226,0000166,0005737,0099081,0032555,0009987,0032550,0001882,1901265,0005575,0097367,0099512,1901363,0005874,0032553,0110165,0008150,0005525,0032549,0032561,0099513,0007017,0007010,0016043,0035639,0048285,0099080,0017076,0036094,0000280,0071840
TRINITY_DN1493_c0_g1_i30	tubulin alpha chain	0	0	0	393.168	0	0	0	0	0.059	0	39.3227	1795	1	0140014,0003674,0097159,0043167,0006996,0019001,0043168,0001883,0000226,0000166,0005737,0099081,0032555,0009987,0032550,0001882,1901265,0005575,0097367,0099512,1901363,0005874,0032553,0110165,0008150,0005525,0032549,0032561,0099513,0007017,0007010,0016043,0035639,0048285,0099080,0017076,0036094,0000280,0071840
TRINITY_DN1493_c0_g1_i20	tubulin alpha-3 chain	44.722	6.315	34.282	3.804	44.488	0	18.505	50.433	0	3.111	20.566	1354	1	0140014,0003674,0097159,0043167,0006996,0019001,0043168,0001883,0000226,0000166,0005737,0099081,0032555,0009987,0032550,0001882,1901265,0005575,0097367,0099512,1901363,0005874,0032553,0110165,0008150,0005525,0032549,0032561,0099513,0007017,0007010,0016043,0035639,0048285,0099080,0017076,0036094,0000280,0071840
TRINITY_DN1493_c0_g1_i38	tubulin alpha-1C chain	89.082	6.33	9.071	4.31	9.265	7.681	3.61	12.099	6.199	1.194	14.8841	1120	1	0140014,0003674,0097159,0043167,0006996,0019001,0043168,0001883,0000226,0000166,0005737,0099081,0032555,0009987,0032550,0001882,1901265,0005575,0097367,0099512,1901363,0005874,0032553,0110165,0008150,0005525,0032549,0032561,0099513,0007017,0007010,0016043,0035639,0048285,0099080,0017076,0036094,0000280,0071840
TRINITY_DN1493_c0_g1_i9	tubulin alpha chain	0	0	12.156	48.406	8.116	0	1.227	0	0	0	6.9905	1804	1	0140014,0003674,0097159,0043167,0006996,0019001,0043168,0001883,0000226,0000166,0005737,0099081,0032555,0009987,0032550,0001882,1901265,0005575,0097367,0099512,1901363,0005874,0032553,0110165,0008150,0005525,0032549,0032561,0099513,0007017,0007010,0016043,0035639,0048285,0099080,0017076,0036094,0000280,0071840
TRINITY_DN1493_c0_g1_i46	tubulin alpha chain	0	0	19.558	28.299	1.363	0	0	0	0.792	0.254	5.0266	1903	1	0140014,0003674,0097159,0043167,0006996,0019001,0043168,0001883,0000226,0000166,0005737,0099081,0032555,0009987,0032550,0001882,1901265,0005575,0097367,0099512,1901363,0005874,0032553,0110165,0008150,0005525,0032549,0032561,0099513,0007017,0007010,0016043,0035639,0048285,0099080,0017076,0036094,0000280,0071840
TRINITY_DN1493_c0_g1_i7	tubulin alpha chain	0	0	0.913	23.007	0	13.314	0	0	0	2.785	4.0019	1749	1	0140014,0003674,0097159,0043167,0006996,0019001,0043168,0001883,0000226,0000166,0005737,0099081,0032555,0009987,0032550,0001882,1901265,0005575,0097367,0099512,1901363,0005874,0032553,0110165,0008150,0005525,0032549,0032561,0099513,0007017,0007010,0016043,0035639,0048285,0099080,0017076,0036094,0000280,0071840
TRINITY_DN1493_c0_g1_i5	tubulin alpha-1C chain	0.442	0.055	0.106	38.571	0.189	0	0	0	0	0	3.9363	1779	1	0140014,0003674,0097159,0043167,0006996,0019001,0043168,0001883,0000226,0000166,0005737,0099081,0032555,0009987,0032550,0001882,1901265,0005575,0097367,0099512,1901363,0005874,0032553,0110165,0008150,0005525,0032549,0032561,0099513,0007017,0007010,0016043,0035639,0048285,0099080,0017076,0036094,0000280,0071840
TRINITY_DN1493_c0_g1_i4	tubulin alpha-1C chain	0	0	0	36.933	0	0	0	0	0	0	3.6933	1740	1	0140014,0003674,0097159,0043167,0006996,0019001,0043168,0001883,0000226,0000166,0005737,0099081,0032555,0009987,0032550,0001882,1901265,0005575,0097367,0099512,1901363,0005874,0032553,0110165,0008150,0005525,0032549,0032561,0099513,0007017,0007010,0016043,0035639,0048285,0099080,0017076,0036094,0000280,0071840
TRINITY_DN1493_c0_g1_i2	tubulin alpha-3 chain	0.114	0.315	0.088	0.481	1.51	0.155	7.105	16.725	0.446	0	2.6939	1449	1	0140014,0003674,0097159,0043167,0006996,0019001,0043168,0001883,0000226,0000166,0005737,0099081,0032555,0009987,0032550,0001882,1901265,0005575,0097367,0099512,1901363,0005874,0032553,0110165,0008150,0005525,0032549,0032561,0099513,0007017,0007010,0016043,0035639,0048285,0099080,0017076,0036094,0000280,0071840
TRINITY_DN1493_c0_g1_i39	tubulin alpha chain	0	0	0	19.47	0	0	0.514	0	0	0	1.9984	1740	1	0140014,0003674,0097159,0043167,0006996,0019001,0043168,0001883,0000226,0000166,0005737,0099081,0032555,0009987,0032550,0001882,1901265,0005575,0097367,0099512,1901363,0005874,0032553,0110165,0008150,0005525,0032549,0032561,0099513,0007017,0007010,0016043,0035639,0048285,0099080,0017076,0036094,0000280,0071840
TRINITY_DN840_c9_g1_i12	Wap65-2	0.214	0	0	0	0.192	0.09	0	0.21	0.211	3705.86	370.678	1515	1	0043167,0051186,0044237,0004222,0043062,0043169,0006807,1901564,0046483,0009987,0140096,0110165,0004175,0006778,0005575,0005615,0042440,0016787,0070011,0033013,1901360,0042168,0003824,0008233,0008237,0008150,0071704,0006725,0030198,0003674,0016043,0046872,0071840
TRINITY_DN840_c9_g1_i3	Hemopexin	0.118	0.071	0.061	0	0	0	0	0	0	76.71	7.696	1017	1	0043167,0055065,0051184,0051186,0044237,0015232,0070011,0004222,0043062,0043169,0042592,0006807,0006873,0055080,0055082,0046483,0009987,0140096,0110165,0004175,0006778,0005575,0005615,0042440,0048878,0016787,0098771,0055072,0033013,0055076,1901360,0042168,0022857,0003824,0065008,0008233,0008237,0050801,0008150,0006725,0071704,0006879,0030003,0006875,0030198,0003674,0016043,0019725,0046872,0005623…
TRINITY_DN840_c9_g1_i7	hemopexin	0	0	0	0	0	0	0	0	0	27.454	2.7454	1591	1	0043167,0055065,0051184,0051186,0044237,0015232,0070011,0004222,0043062,0043169,0042592,0006807,0006873,0055080,0055082,0046483,0009987,0140096,0110165,0004175,0006778,0005575,0005615,0042440,0048878,0016787,0098771,0055072,0033013,0055076,1901360,0042168,0022857,0003824,0065008,0008233,0008237,0050801,0008150,0006725,0071704,0006879,0030003,0006875,0030198,0003674,0016043,0019725,0046872,0005623…
TRINITY_DN2109_c0_g1_i8	thioredoxin	303.464	2107.54	258.365	265.629	124.754	592.911	99.806	189.802	198.691	243.124	438.408	822	1
TRINITY_DN2109_c0_g1_i12	thioredoxin	0.452	18.293	1.373	2.646	1.082	3.213	0.635	3.161	2.622	3.163	3.664	1596	2
TRINITY_DN2109_c0_g1_i17	thioredoxin	0.048	18.661	0.946	1.517	0.148	2.728	0.518	0.718	0.721	1.555	2.756	1695	2
TRINITY_DN1637_c1_g1_i4	TRINITY_DN1637_c1_g1_i4	0.283	0	0.829	0	1203.78	0.392	706.215	2510.76	0	0.474	442.273	802	0
TRINITY_DN1637_c1_g1_i1	TRINITY_DN1637_c1_g1_i1	0	0	0	0.222	17.109	0	2.869	87.888	0	0	10.8088	1265	0
TRINITY_DN1637_c1_g1_i6	TRINITY_DN1637_c1_g1_i6	0	0	0	0	3.709	0	4.298	59.063	0	0	6.707	1434	0
TRINITY_DN1637_c1_g1_i3	TRINITY_DN1637_c1_g1_i3	0	0	0	0	1.449	0	1.574	30.825	0	0	3.3848	2131	0
TRINITY_DN132_c0_g2_i1	Myosin, light chain 1, alkali, skeletal, fast	0.66	0.18	2.322	0	1.986	0.062	3741.22	20.469	0.116	0	376.702	1170	2	0043169,0046872,0005509,0003674,0043167
TRINITY_DN214_c0_g1_i1	beta-crystallin A3	0	0	0.173	0.069	4824.06	0	0	0.13	0	0	482.443	1058	1	0002088,0048856,0008150,0032502
TRINITY_DN386_c0_g1_i18	prothrombin	5.874	3.529	2.902	2.696	1.937	3.573	2.419	2.712	5.639	1304.85	133.613	2147	2	0097159,0043169,0007596,0043167,0004252,0050817,0110165,0050878,0006953,0006952,0140096,0006954,0004175,0016825,0005575,0005576,0016787,0070011,1901363,0065008,0003824,0032501,0008233,0008236,0008150,0005509,0003674,0003676,0002526,0007599,0017171,0046872
TRINITY_DN386_c0_g1_i50	Prothrombin	0	0.38	0	0	0	0	0	0.09	0	760.035	76.0505	1170	2	0004252,0050817,0006807,0050878,0140096,0110165,0006508,0004175,0016825,0005575,0005576,1901564,0016787,0070011,0065008,0003824,0032501,0008233,0008236,0044238,0008150,0043170,0071704,0019538,0003674,0007599,0017171,0007596
TRINITY_DN386_c0_g1_i81	Prothrombin	0	0.308	0.408	0	0	0.323	0.199	0	0.211	748.335	74.9784	3311	2	0097159,0043169,0007596,0043167,0004252,0050817,0110165,0050878,0006953,0006952,0140096,0006954,0004175,0016825,0005575,0005576,0016787,0070011,1901363,0065008,0003824,0032501,0008233,0008236,0008150,0005509,0003674,0003676,0002526,0007599,0017171,0046872
TRINITY_DN386_c0_g1_i47	prothrombin	0.061	0	0	0	0.039	0.093	0	0.349	0.44	668.874	66.9856	3316	3	1901363,0003674,0110165,0097159,0005575,0003676,0005615
TRINITY_DN386_c0_g1_i44	Putative prothrombin	0	0	0	0.206	0.114	0.377	0	0.054	0.288	109.725	11.0764	3513	5	0097159,0043169,0007596,0043167,0004252,0050817,0110165,0050878,0006953,0006952,0140096,0006954,0004175,0016825,0005575,0005576,0016787,0070011,1901363,0065008,0003824,0032501,0008233,0008236,0008150,0005509,0003674,0003676,0002526,0007599,0017171,0046872
TRINITY_DN386_c0_g1_i12	CROL alpha	3.337	3.244	2.254	3.721	3.031	2.332	3.366	3.18	3.848	67.181	9.5494	3183	7	0097159,0043169,0007596,0043167,0004252,0006807,0110165,0050817,0050878,0006953,0006952,0140096,0006954,0006508,0004175,0016825,0005575,0005576,1901564,0016787,0070011,1901363,0065008,0003824,0032501,0008233,0008236,0044238,0008150,0043170,0071704,0005509,0019538,0003674,0003676,0002526,0007599,0017171,0046872
TRINITY_DN386_c0_g1_i59	prothrombin	0	0	0.222	0	0	0.527	0	0	0.262	34.584	3.5595	432	1	0004252,0050817,0006807,0050878,0140096,0110165,0006508,0004175,0016825,0005575,0005576,1901564,0016787,0070011,0065008,0003824,0032501,0008233,0008236,0044238,0008150,0043170,0071704,0019538,0003674,0007599,0017171,0007596
TRINITY_DN386_c0_g1_i79	prothrombin	0	0	0	0.104	0	0.102	0	0	0	18.447	1.8653	797	2	0004252,0050817,0006807,0050878,0140096,0110165,0006508,0004175,0016825,0005575,0005576,1901564,0016787,0070011,0065008,0003824,0032501,0008233,0008236,0044238,0008150,0043170,0071704,0019538,0003674,0007599,0017171,0007596
TRINITY_DN386_c0_g1_i46	TRINITY_DN386_c0_g1_i46	0	0	0	0	0	0	0	0	0	9.83	0.983	298	0
TRINITY_DN3286_c1_g2_i5	Pyruvate kinase	73.792	42.51	406.707	254.288	471.936	201.388	49.137	144.111	148.9	25.558	181.833	1722	1	0000287,0071310,0009150,0032868,0032869,1901135,0010033,0003674,0009725,0019637,0009132,0072521,0009259,0031420,0043167,0043169,0043436,1901699,1901698,0071375,0046031,0032787,0019752,0005737,0043434,0044281,0009179,0046483,0055086,0009987,0006091,0006096,0016052,0110165,0006139,0006796,1901653,1901652,0006793,0019693,0016310,0005575,0006753,1901564,0006757,0004743,0071704,1901360,1901575,0055114…
TRINITY_DN3286_c1_g2_i4	pyruvate kinase PKM	0	0	0.47	0.187	11.01	275.269	1407.91	10.332	0	0.149	170.533	3005	1	0000287,0071310,0009150,0032868,0032869,1901135,0010033,0003674,0009725,0019637,0009132,0072521,0009259,0031420,0043167,0043169,0043436,1901699,1901698,0071375,0046031,0032787,0019752,0005737,0043434,0044281,0009179,0046483,0055086,0009987,0006091,0006096,0016052,0110165,0006139,0006796,1901653,1901652,0006793,0019693,0016310,0005575,0006753,1901564,0006757,0004743,0071704,1901360,1901575,0055114…
TRINITY_DN3286_c1_g2_i11	Pyruvate kinase	50.617	6.719	69.864	9.962	177.056	29.255	2.23	21.523	12.224	0.793	38.0243	3151	1	0000287,0071310,0009150,0032868,0032869,1901135,0010033,0003674,0009725,0019637,0009132,0072521,0009259,0031420,0043167,0043169,0043436,1901699,1901698,0071375,0046031,0032787,0019752,0005737,0043434,0044281,0009179,0046483,0055086,0009987,0006091,0006096,0016052,0110165,0006139,0006796,1901653,1901652,0006793,0019693,0016310,0005575,0006753,1901564,0006757,0004743,0071704,1901360,1901575,0055114…
TRINITY_DN3286_c1_g2_i1	pyruvate kinase PKM	21.367	11.448	44.88	12.218	40.873	96.994	2.657	12.239	9.344	9.364	26.1384	1644	1	0000287,0071310,0009150,0032868,0032869,1901135,0010033,0003674,0009725,0019637,0009132,0072521,0009259,0031420,0043167,0043169,0043436,1901699,1901698,0071375,0046031,0032787,0019752,0005737,0043434,0044281,0009179,0046483,0055086,0009987,0006091,0006096,0016052,0110165,0006139,0006796,1901653,1901652,0006793,0019693,0016310,0005575,0006753,1901564,0006757,0004743,0071704,1901360,1901575,0055114…
TRINITY_DN3286_c1_g2_i2	Pyruvate kinase	0.796	8.621	14.388	11.556	10.755	63.967	0.799	7.597	7.845	10.997	13.7321	2305	2	0000287,0071310,0009150,0032868,0032869,1901135,0010033,0003674,0009725,0019637,0009132,0072521,0009259,0031420,0043167,0043169,0043436,1901699,1901698,0071375,0046031,0032787,0019752,0005737,0043434,0044281,0009179,0046483,0055086,0009987,0006091,0006096,0016052,0110165,0006139,0006796,1901653,1901652,0006793,0019693,0016310,0005575,0006753,1901564,0006757,0004743,0071704,1901360,1901575,0055114…
TRINITY_DN5062_c0_g2_i1	guanine nucleotide-binding protein subunit gamma	0.525	1.995	0.967	0	4756.34	0.104	0.155	0.672	0.297	0	476.106	769	1	0009987,0007165,0008150,0050794,0007186
TRINITY_DN5062_c0_g2_i3	Guanine nucleotide-binding protein subunit gamma	0	0.409	0	0.131	13.706	0	0	0.324	0	0	1.457	1110	2	0016787,0016462,1905360,0017111,0032991,0098796,0098797,0009987,0016817,0007186,0003674,0003824,0005834,0016818,1902494,0003924,0050794,0005575,0007165,0008150
TRINITY_DN7195_c0_g2_i2	TRINITY_DN7195_c0_g2_i2	0.411	1253.06	79.39	266.752	16.86	188.74	38.594	236.972	312.126	148.933	254.184	309	0
TRINITY_DN7195_c0_g2_i5	MHC class I antigen	2.073	367.956	33.507	75.801	6.883	53.717	18.58	112.398	135.861	68.43	87.5206	381	1	0005575,0031224,0016021,0110165
TRINITY_DN7195_c0_g2_i1	MHC class I antigen	0	237.083	27.311	24.075	6.296	38.623	7.3	67.333	72.924	51.212	53.2157	450	1	0005575,0031224,0016021,0110165
TRINITY_DN7195_c0_g2_i3	MHC class I antigen	1.354	168.075	15.254	34.86	2.489	34.611	8.915	63.352	66.83	47.41	44.315	373	1	0005575,0031224,0016021,0110165
TRINITY_DN647_c0_g1_i3	glutaredoxin-1	222.675	1243.41	234.192	242.787	129.391	113.119	711.541	409.024	291.17	492.303	408.962	890	2	0048869,0006996,0032549,0016818,0051128,0051493,0016817,0033043,0003674,0097159,0040011,0017076,0001882,0043167,0097367,0019001,0043168,0005515,0050793,0000166,0019899,0008360,0005737,0016477,0000902,0035639,1901265,0032555,0009987,0097435,0032550,0022603,0001883,0007015,0042995,0048870,0005575,0007163,0007165,0043232,0016787,0005856,0007265,1901363,0032956,0032970,0005938,0099568,0003824,0007266…
TRINITY_DN647_c0_g1_i2	Glutaredoxin thioltransferase	0.239	60.168	9.315	13.697	6.934	8.302	9.875	25.016	16.567	22.402	17.2515	1903	3	0040011,0019001,0032555,0009987,0097435,0032550,0032989,0110165,0007163,0007165,1901363,0016020,0045454,0009653,0017111,0005886,0031410,0032561,0007266,0036094,0007264,0007265,0043167,0033043,0097367,0005515,0031982,0042995,0005575,0043231,0043232,0032502,0065008,0003924,0019901,0019900,0008150,0019725,0016043,0043228,0043229,0017076,0032553,0043226,0043227,0048869,0001882,0051128,0043168,0001883…
TRINITY_DN670_c0_g1_i6	complement factor H-like	0	0.162	0.295	44.065	0.508	0	0	0	0	1237.95	128.298	1584	1
TRINITY_DN670_c0_g1_i2	complement factor H-like	0	0.308	0.032	4.152	0.189	0	0	0	0	1034.57	103.925	2812	1
TRINITY_DN670_c0_g1_i7	complement factor H -related	0	0	0	26.67	0.419	0.156	0	0	0.074	552.595	57.9914	956	1
TRINITY_DN670_c0_g1_i20	Putative complement factor H-like	0	0	0	0	0	0	0	0	0	234.733	23.4733	1389	1
TRINITY_DN670_c0_g1_i15	complement factor H-like	0	0	0	8.3	0	0	0	0.093	0	213.268	22.1661	812	1
TRINITY_DN670_c0_g1_i16	Putative complement factor H-like	0	0	0	12.433	0.247	0	0	0	0	182.58	19.526	1228	1
TRINITY_DN670_c0_g1_i22	complement factor H-like	0	0	0	5.979	0	0	0	0	0	115.537	12.1516	3102	2
TRINITY_DN670_c0_g1_i1	complement factor H-like	0	0	0	0.672	0	0	0	0	0	26.559	2.7231	495	1
TRINITY_DN23030_c0_g1_i1	TRINITY_DN23030_c0_g1_i1	180.575	396.812	516.53	424.491	466.794	298.23	1195.35	265.782	188.697	279.031	421.229	485	0
TRINITY_DN6207_c0_g1_i1	BNAA08G13100D protein	0.124	11.897	1029.66	71.334	1305.02	1504.15	215.633	321.334	63.931	0.414	452.35	886	0
TRINITY_DN7516_c0_g1_i4	Nucleoside diphosphate kinase	902.569	639.819	248.391	473.11	571.729	101.649	181.442	763.379	189.139	398.341	446.957	948	1	0044237,0009119,0046039,0046036,0009116,0009117,0009218,0032559,0032555,0009987,0009199,0032553,1901657,0019693,0018130,0046128,0046129,1901363,1901362,1901360,0009206,0009205,0009201,0044238,0009208,0009209,0006163,0009165,0009163,0006164,0036094,0006221,0006220,0009150,0006183,0006228,1901070,0090407,0030554,0019637,0097367,0019438,0016740,0044281,0044283,0072521,0072522,0072527,0072528,0006753…
TRINITY_DN2531_c0_g2_i2	Apolipoprotein AIV	0	3951.93	0	0	0.282	0.065	0.096	0.062	0	4.394	395.683	1100	1	0071704,1901564,0051234,0006869,0071702,0019538,0051179,0003674,0110165,0005576,0044238,0005575,0006807,0008289,0042157,0008150,0043170
TRINITY_DN2531_c0_g2_i1	Apolipoprotein AIV	0	111.428	0	0	0	0	0	0	0	0	11.1428	1182	1	0071704,1901564,0051234,0006869,0071702,0019538,0051179,0003674,0110165,0005576,0044238,0005575,0006807,0008289,0042157,0008150,0043170
TRINITY_DN2531_c0_g2_i4	Apolipoprotein AIV	0	19.553	0	0	0	0	0	0	0	0	1.9553	1433	2	0071704,1901564,0051234,0006869,0071702,0019538,0051179,0003674,0110165,0005576,0044238,0005575,0006807,0008289,0042157,0008150,0043170
TRINITY_DN2531_c0_g2_i3	Apolipoprotein AIV	0	11.91	0.128	0.514	0	0	0	0	0.145	0	1.2697	1351	2	0071704,1901564,0051234,0006869,0071702,0019538,0051179,0003674,0110165,0005576,0044238,0005575,0006807,0008289,0042157,0008150,0043170
TRINITY_DN447_c0_g1_i8	phospholipid hydroperoxide glutathione peroxidase	6.277	1059.3	231.337	60.128	254.221	103.148	141.08	33.017	82.89	752.944	272.434	953	2	0055114,0016684,0016209,0004601,0003674,0016491,0004602,0003824,0006979,0008150
TRINITY_DN447_c0_g1_i1	phospholipid hydroperoxide glutathione peroxidase	7.481	141.28	107.456	20.048	158.792	62.246	65.182	16.977	20.517	178.635	77.8614	980	2	0055114,0016684,0016209,0004601,0003674,0016491,0004602,0003824,0006979,0008150
TRINITY_DN447_c0_g1_i4	phospholipid hydroperoxide glutathione peroxidase	0.062	151.443	1.207	0.787	21.012	1.012	0.06	0.626	0.636	100.969	27.7814	2041	2	0055114,0016684,0016209,0004601,0003674,0016491,0004602,0003824,0006979,0008150
TRINITY_DN447_c0_g1_i6	TRINITY_DN447_c0_g1_i6	0.217	110.732	3.426	5.775	72.74	17.532	5.186	2.53	2.685	23.122	24.3945	583	0
TRINITY_DN447_c0_g1_i5	TRINITY_DN447_c0_g1_i5	0	18.707	1.44	2.75	6.826	1.864	1.31	0.974	4.17	10.82	4.8861	609	0
TRINITY_DN8034_c1_g2_i2	Crystallin, gamma S2	0	0	0	0	4486.09	0	0	0	0	0	448.609	736	1	0002088,0048856,0008150,0032502
TRINITY_DN8034_c1_g2_i3	TRINITY_DN8034_c1_g2_i3	0.187	4.571	2.627	13.997	4.145	3.471	2.511	5.51	10.21	7.828	5.5057	660	0
TRINITY_DN8034_c1_g2_i4	Crystallin, gamma S2	0.408	4.607	1.434	13.51	6.354	3.079	0.837	4.019	8.761	7.603	5.0612	928	1	0002088,0048856,0008150,0032502
TRINITY_DN8034_c1_g2_i1	Crystallin, gamma S2	0	0	0	0	15.384	0	0	0	0	0	1.5384	595	1	0002088,0048856,0008150,0032502
TRINITY_DN752_c0_g1_i2	hepcidin	0.392	0	0	0	0	0	0	0.132	0	3404.01	340.453	639	1	0098771,0055072,0055082,0055065,0055076,0055080,0006875,0009987,0030003,0110165,0065008,0005575,0046916,0048878,0019725,0042592,0005576,0050801,0008150,0006873,0006879
TRINITY_DN752_c0_g1_i1	Hepcidin domain containing protein	0	0	0	0	0	0	0	0	0	96.515	9.6515	724	1
TRINITY_DN752_c0_g1_i3	TRINITY_DN752_c0_g1_i3	0	0	0	0	0	0	0	0	0	59.951	5.9951	894	0
TRINITY_DN752_c0_g1_i4	TRINITY_DN752_c0_g1_i4	0	0	0	0	0	0	0	0	0	53.213	5.3213	809	0
TRINITY_DN11190_c0_g1_i8	cofilin-2-like	365.307	958.962	778.849	559.505	330.516	360.998	110.653	365.539	487.887	115.275	443.349	1662	1
TRINITY_DN8232_c1_g1_i1	beta-crystallin B2	0	0	29.416	0	4551.99	0	0	0	0.226	0	458.163	943	1	0002088,0048856,0008150,0032502
TRINITY_DN4012_c0_g1_i30	myosin regulatory light polypeptide 9	124.103	247.131	230.941	139.312	158.989	517.807	262.65	442.096	289.712	198.719	261.146	1245	1	0043169,0046872,0005509,0003674,0043167
TRINITY_DN4012_c0_g1_i35	myosin regulatory light chain 12A	35.239	87.55	71.309	91.985	63.937	168.234	110.401	198.147	137.655	67.385	103.184	1528	2
TRINITY_DN4012_c0_g1_i15	myosin regulatory light polypeptide 9	11.398	21.728	23.841	7.725	11.664	92.402	17.983	29.791	24.462	16.804	25.7798	803	1
TRINITY_DN4012_c0_g1_i8	myosin regulatory light polypeptide 9	4.339	0	1.918	92.006	0	22.63	7.494	43.455	67.1	0	23.8942	1154	1	0043169,0046872,0005509,0003674,0043167
TRINITY_DN4012_c0_g1_i18	myosin regulatory light polypeptide 9	5.135	10.389	9.684	12.026	6.744	18.282	14.865	25.201	15.715	8.976	12.7017	2889	1
TRINITY_DN1740_c14_g1_i1	TRINITY_DN1740_c14_g1_i1	2.788	1228.05	131.579	353.587	173.566	397.188	365.324	687.973	737.482	154.728	423.226	267	0
TRINITY_DN5831_c0_g1_i1	triosephosphate isomerase b	54.978	95.075	352.598	197.357	236.433	807.893	1740.8	217.86	90.962	100.159	389.411	1710	1	0006091,0016853,0006094,0031224,0003674,0019637,0009132,0072521,0009259,0009135,0009150,0046034,0043436,0006807,0006082,0046031,0032787,0019752,0005996,0046364,0044281,0009179,0046483,0055086,0009987,1901360,0006096,0016052,0016051,0110165,0006139,0006796,0006793,0019693,0016310,0005575,0006753,1901564,0006757,0071704,1901135,1901575,0055114,0008150,0005975,0016860,0016861,0003824,0009058,0044237…
TRINITY_DN7594_c0_g1_i1	TRINITY_DN7594_c0_g1_i1	11.008	191.743	95.662	283.016	90.214	410.766	445.209	366.921	330.985	203.046	242.857	439	0
TRINITY_DN7594_c0_g1_i2	nucleolar RNA helicase 2-like	8.979	154.311	43.275	61.38	37.527	156.493	239.108	224.913	112.617	342.558	138.116	3240	1	0005730,0110165,0043228,0043229,0005575,0043226,0043232
TRINITY_DN7594_c0_g1_i4	glycine-rich cell wall structural protein 1-like	0	15.538	12.973	72.685	5.568	7.573	54.297	14.673	48.063	3.346	23.4716	1866	1	0016818,0016817,0030554,0097159,0043167,0097367,0043168,1901265,0008144,0032559,0016887,0032555,0003723,0110165,0000166,0005575,0005634,0043231,0016787,1901363,0003824,0032553,0016462,0017111,0005524,0003674,0003676,0035639,0043229,0017076,0036094,0043226,0043227,0004386
TRINITY_DN588_c0_g3_i1	Lipocln cytosolic FA-bd dom domain-containing protein	0	1.11	238.743	0	4242.7	0	1.058	0.549	0	2.055	448.622	622	1
TRINITY_DN1776_c0_g1_i12	epithelial cell adhesion molecule	503.716	739.702	18.926	283.135	43.392	1.144	115.359	765.836	1.583	15.702	248.85	1641	1
TRINITY_DN1776_c0_g1_i4	Putative epithelial cell adhesion molecule	0	247.989	6.19	306.391	70.512	0	223.643	666.277	1.653	0	152.266	905	1	0090504,0098609,0002011,0040011,0048883,0016477,0001889,0009987,0110165,0048732,0048870,0048598,0005575,0055113,0002009,0048856,0032502,0031224,0016020,0016021,0008150,0009653,0016323,0022610,0048471,0048920,0048729,0007155,0048513
TRINITY_DN1776_c0_g1_i5	Putative epithelial cell adhesion molecule	0	10.726	0	7.908	0	0	8.189	71.842	0	0	9.8665	1319	1	0090504,0098609,0002011,0040011,0048883,0016477,0001889,0009987,0110165,0048732,0048870,0048598,0005575,0055113,0002009,0048856,0032502,0031224,0016020,0016021,0008150,0009653,0016323,0022610,0048471,0048920,0048729,0007155,0048513
TRINITY_DN1776_c0_g1_i6	Putative epithelial cell adhesion molecule	0.062	7.749	0.139	2.145	0.352	0	5.514	25.928	0	0	4.1889	2050	3	0090504,0098609,0002011,0040011,0048883,0016477,0001889,0009987,0110165,0048732,0048870,0048598,0005575,0055113,0002009,0048856,0032502,0031224,0016020,0016021,0008150,0009653,0016323,0022610,0048471,0048920,0048729,0007155,0048513
TRINITY_DN1776_c0_g1_i3	tumor-associated calcium signal transducer 2-like	0.078	4.343	0	0.195	1.989	0	2.563	17.276	0	0.26	2.6704	1560	2	0090504,0098609,0002011,0040011,0048883,0016477,0001889,0009987,0110165,0048732,0048870,0048598,0005575,0055113,0002009,0048856,0032502,0031224,0016020,0016021,0008150,0009653,0016323,0022610,0048471,0048920,0048729,0007155,0048513
TRINITY_DN1508_c0_g1_i13	myosin light polypeptide 6	161.395	449.519	261.476	347.164	155.627	498.018	175.981	523.371	503.73	294.746	337.103	1112	1
TRINITY_DN1508_c0_g1_i6	myosin light polypeptide 6	11.862	51.296	98.368	49.329	32.762	84.929	28.948	100.513	87.713	28.755	57.4475	1166	1
TRINITY_DN1508_c0_g1_i3	myosin light polypeptide 6	2.806	17.98	8.561	15.702	9.315	18.899	10.057	33.523	25.188	9.402	15.1433	2206	1
TRINITY_DN1508_c0_g1_i2	myosin light polypeptide 6	1.321	7.453	4.081	6.563	4.171	6.653	4.26	18.055	9.267	4.428	6.6252	2809	1
TRINITY_DN659_c0_g1_i1	Aminopeptidase	0	3135.06	0	75.05	0	0	0	0	0	0	321.011	1397	1	0031224,0044238,0043167,0043169,0006807,0005737,0140096,0110165,0004177,0005575,1901564,0016787,0071704,0070011,0042277,0003824,0008233,0008237,0008238,0016020,0016021,0008150,0043170,0033218,0005886,0019538,0008270,0003674,0046872,0006508,0046914
TRINITY_DN659_c0_g1_i7	Aminopeptidase	0	445.96	0	71.682	0	0	0	0	0	0	51.7642	1075	1	0031224,0044238,0043167,0043169,0006807,0005737,0140096,0110165,0004177,0005575,1901564,0016787,0071704,0070011,0042277,0003824,0008233,0008237,0008238,0016020,0016021,0008150,0043170,0033218,0005886,0019538,0008270,0003674,0046872,0006508,0046914
TRINITY_DN659_c0_g1_i4	Aminopeptidase	0	75.27	0	0.939	0	0	0	0	0	0	7.6209	1807	3	0031224,0044238,0043167,0043169,0006807,0005737,0140096,0110165,0004177,0005575,1901564,0016787,0071704,0070011,0042277,0003824,0008233,0008237,0008238,0016020,0016021,0008150,0043170,0033218,0005886,0019538,0008270,0003674,0046872,0006508,0046914
TRINITY_DN659_c0_g1_i15	Aminopeptidase	0.039	44.874	0	10.093	0	0	0	0	0	0	5.5006	1268	1	0031224,0044238,0043167,0043169,0006807,0005737,0140096,0110165,0004177,0005575,1901564,0016787,0071704,0070011,0042277,0003824,0008233,0008237,0008238,0016020,0016021,0008150,0043170,0033218,0005886,0019538,0008270,0003674,0046872,0006508,0046914
TRINITY_DN659_c0_g1_i8	Aminopeptidase	0	24.371	0	0.068	0	0	0	0	0	0	2.4439	1710	3	0031224,0044238,0043167,0043169,0006807,0005737,0140096,0110165,0004177,0005575,1901564,0016787,0071704,0070011,0042277,0003824,0008233,0008237,0008238,0016020,0016021,0008150,0043170,0033218,0005886,0019538,0008270,0003674,0046872,0006508,0046914
TRINITY_DN222_c0_g1_i1	arginine/serine-rich protein 1-like	41.237	158.373	349.377	246.266	357.143	295.007	117.217	178.623	289.162	316.496	234.89	2141	2
TRINITY_DN222_c0_g1_i5	arginine/serine-rich protein 1-like	0.109	31.229	139.362	74.542	81.712	60.942	39.914	53.348	139.117	23.271	64.3546	1011	1
TRINITY_DN222_c0_g1_i4	arginine/serine-rich protein 1-like	1.513	69.08	47.61	62.814	54.037	47.033	15.13	53.87	64.197	69.499	48.4783	2649	3
TRINITY_DN222_c0_g1_i6	arginine/serine-rich protein 1-like	1.734	32.266	55.591	17.864	57.074	84.544	6.954	12.967	23.429	94.23	38.6653	1593	1
TRINITY_DN222_c0_g1_i9	arginine/serine-rich protein 1-like	0.59	10.193	27.493	8.548	23.464	52.296	5.217	6.021	13.254	56.229	20.3305	1562	1
TRINITY_DN222_c0_g1_i2	arginine/serine-rich protein 1-like	0.986	10.815	5.435	6.172	3.003	15.423	0.807	4.309	5.66	10.37	6.298	1967	1
TRINITY_DN69_c0_g1_i34	muscle-specific beta 1 integrin-binding protein 2	451.056	407.37	149.334	214.811	75.181	336.051	164.26	247.838	346.005	1238.58	363.048	1185	1	0016772,0003824,0016301,0016740,0003674
TRINITY_DN69_c0_g1_i13	Muscle-specific beta 1 integrin binding protein 2	7.398	19.032	7.353	16.208	4.832	11.143	3.845	14.038	23.707	67.465	17.5021	1560	3	0007517,0085029,0061061,0043062,0034330,0007044,0016740,0070831,0071711,0022607,0007165,0007166,0048856,0016301,0003824,0032502,0034329,0050794,0008150,0016772,0030198,0007229,0003674,0016043,0048513,0009987,0150115,0071840
TRINITY_DN69_c0_g1_i26	Muscle-specific beta 1 integrin binding protein 2	10.722	11.865	2.66	7.161	1.71	4.144	3.487	3.756	25.856	29.009	10.037	1039	3	0016740,0016772,0009987,0007229,0003674,0003824,0050794,0016301,0007165,0008150,0007166
TRINITY_DN745_c0_g1_i2	small EDRK-rich factor 2	263.314	243.541	534.402	324.199	510.988	674.553	585.602	250.753	412.689	268.462	406.85	763	1
TRINITY_DN7732_c0_g2_i5	FSH-beta protein	0	0.139	4549.36	0.294	0	0	0.213	0.414	0	0	455.042	620	1	0009755,0098772,0005102,0003674,0005737,0030545,0005615,0009987,0030546,0007186,0110165,0048018,0050794,0005575,0005179,0005515,0007165,0008150
TRINITY_DN1787_c0_g1_i3	plasminogen activator inhibitor 1 RNA-binding protein	253.488	257.137	211.264	350.306	228.807	438.098	826.815	531.111	333.23	411.923	384.218	2689	1
TRINITY_DN1787_c0_g1_i4	plasminogen activator inhibitor 1 RNA-binding protein	4.599	5.957	3.43	3.729	6.077	12.557	7.063	5.041	7.146	7.581	6.318	2808	2
TRINITY_DN2334_c1_g1_i2	ribosome biogenesis protein NSA2 -like	174.944	342.237	212.249	270.228	126.935	370.469	554.793	425.519	524.337	825.209	382.692	1105	1	0000460,0006364,0090304,0006807,0034470,1990904,0046483,0016070,0009987,0016072,0110165,0006139,0000470,0005575,0043232,1901360,0030687,0030684,0044237,0044238,0008150,0043170,0032991,0071704,0034641,0005730,0043228,0043229,0006725,0034660,0006396,0043226
TRINITY_DN2334_c1_g1_i5	ribosome biogenesis protein NSA2 -like	0.204	3.344	0.883	5.856	0.847	1.567	0.499	1.369	1.177	18.193	3.3939	1618	1	0000460,0006364,0090304,0006807,0034470,1990904,0046483,0016070,0009987,0016072,0110165,0006139,0000470,0005575,0043232,1901360,0030687,0030684,0044237,0044238,0008150,0043170,0032991,0071704,0034641,0005730,0043228,0043229,0006725,0034660,0006396,0043226
TRINITY_DN4415_c0_g1_i4	fructose-bisphosphate aldolase c	20.929	36.897	1233.63	178.71	1026.05	1023.55	77.36	423.654	176.54	6.884	420.421	2288	1	1901135,0009056,0019637,0009132,0009259,0009135,0009150,0046034,0043436,0006807,0006165,0046031,0032787,0004332,0072521,0044281,0009179,0046483,0055086,0006090,0006091,0006096,0016052,0110165,0006139,0006796,0016829,0006793,0019693,0016310,0005575,0006753,0019752,1901564,0006757,0071704,1901360,0055114,0005975,0003824,1901575,0044237,0044238,0008150,0009185,0034641,0006725,0006163,0046939,0003674…
TRINITY_DN14360_c0_g1_i1	UNC-6/NTR/C345C module domain containing protein	0	0	0	0	0	0	0	0	0	3282.74	328.274	203	1	0006959,0002376,0002684,0002682,0002252,0002253,0006956,0050778,0006955,0005576,0005575,0050776,0110165,0008150
TRINITY_DN14360_c0_g1_i3	UNC-6/NTR/C345C module domain containing protein	0	0	0	0	0	0	0	0	0	46.357	4.6357	337	2	0006959,0002376,0002684,0002682,0002252,0002253,0006956,0050778,0006955,0005576,0005575,0050776,0110165,0008150
TRINITY_DN14360_c0_g1_i2	UNC-6/NTR/C345C module domain containing protein	0	0	0	0	0	0	0	0	0	12.401	1.2401	327	2	0006959,0002376,0002684,0002682,0002252,0002253,0006956,0050778,0006955,0005576,0005575,0050776,0110165,0008150
TRINITY_DN106_c0_g2_i1	Putative CD59 glycoprotein-like	0	0	0	0	0	0.237	0	0	1.02	3285.08	328.634	709	1	0002921,0002698,0002697,0002683,0002682,0001971,0045916,0030449,0001969,0002920,0050777,0050776,0008150
TRINITY_DN106_c0_g2_i2	CD59 glycoprotein	0	0	0	0	0.084	0	0	0	0	28.488	2.8572	972	2	0002921,0002698,0002697,0002683,0002682,0001971,0045916,0030449,0001969,0002920,0050777,0050776,0008150
TRINITY_DN192_c0_g5_i1	TRINITY_DN192_c0_g5_i1	45.008	23.621	25.179	60.282	25.509	2494.59	901.312	47.93	59.867	15.881	369.918	522	0
TRINITY_DN431_c2_g1_i3	interferon alpha-inducible protein 27-like	0	2034.56	2.816	10.361	4.697	1.519	0	0	2.22	69.49	212.567	733	1	0043231,0005739,0043226,0009987,0110165,0043229,0097190,0050794,0031224,0005575,0016021,0007165,0008150,0043227
TRINITY_DN431_c2_g1_i6	interferon alpha-inducible protein 27-like	0.098	519.055	0.249	5.545	0	0.324	0.607	0.131	0	66.717	59.2726	640	1	0043231,0005739,0043226,0009987,0110165,0043229,0097190,0050794,0031224,0005575,0016021,0007165,0008150,0043227
TRINITY_DN431_c2_g1_i1	interferon alpha-inducible protein 45 -related	0.293	37.395	38.304	21.744	6.001	93.098	22.344	18.597	94.935	10.796	34.3507	641	1	0043231,0005739,0043226,0009987,0110165,0043229,0097190,0050794,0031224,0005575,0016021,0007165,0008150,0043227
TRINITY_DN431_c2_g1_i9	interferon alpha-inducible protein 27-like	1.25	0.801	26.178	19.423	6.94	192.289	10.143	9.255	43.018	20.501	32.9798	544	1	0043231,0005739,0043226,0009987,0110165,0043229,0097190,0050794,0031224,0005575,0016021,0007165,0008150,0043227
TRINITY_DN431_c2_g1_i7	interferon alpha-inducible protein 27-like	0.168	8.246	13.298	8.8	6.142	82.546	3.764	7.894	30.393	13.103	17.4354	638	1	0043231,0005739,0043226,0009987,0110165,0043229,0097190,0050794,0031224,0005575,0016021,0007165,0008150,0043227
TRINITY_DN431_c2_g1_i5	interferon alpha-inducible protein 27-like	0.134	65.635	8.837	8.487	4.952	20.136	2.838	5.26	25.078	6.042	14.7399	644	1	0043231,0005739,0043226,0009987,0110165,0043229,0097190,0050794,0031224,0005575,0016021,0007165,0008150,0043227
TRINITY_DN431_c2_g1_i4	interferon alpha-inducible protein 27-like	0	12.278	3.05	1.737	0.967	9.053	0.624	0.188	2.619	0.408	3.0924	639	1	0043231,0005739,0043226,0009987,0110165,0043229,0097190,0050794,0031224,0005575,0016021,0007165,0008150,0043227
TRINITY_DN1190_c1_g1_i1	keratin 90	0.627	0	0.245	0	45.456	0.143	386.874	3290.71	0	0	372.406	613	1	0005882,0042246,0048589,0099081,0099080,0048856,0009888,0099512,0031099,0032502,0031101,0005575,0045095,0110165,0099513,0008150
TRINITY_DN1190_c1_g1_i4	keratin 90	0	5.743	0	0	29.968	0	25.22	222.572	0	0	28.3503	628	1	0005882,0042246,0048589,0099081,0099080,0048856,0009888,0099512,0031099,0032502,0031101,0005575,0045095,0110165,0099513,0008150
TRINITY_DN2072_c2_g1_i5	nuclear protein 1b	2.233	247.772	55.246	225.13	28.859	29.855	103.613	137.1	29.488	1988.72	284.802	609	1	0051252,0045786,0006366,0031323,0090304,1901576,0019222,0019438,0006807,1903506,0051726,0008285,0034654,0080090,0008283,0031326,0016070,0009987,2000112,2001141,0044260,0006139,0006357,0006351,0005575,0005634,0043231,0018130,0048523,0044249,0051171,1901362,1901360,0009889,0110165,0034641,0010556,0050794,0044237,0044238,0042127,0008150,0043170,0006725,0071704,0019219,0009059,0009058,0046483,0034645…
TRINITY_DN2072_c2_g1_i7	nuclear protein 1b	0	37.269	6.346	36.467	0.207	1.393	13.584	16.467	2.155	288.748	40.2636	675	1	0051252,0045786,0006366,0031323,0090304,1901576,0019222,0019438,0006807,1903506,0051726,0008285,0034654,0080090,0008283,0031326,0016070,0009987,2000112,2001141,0044260,0006139,0006357,0006351,0005575,0005634,0043231,0018130,0048523,0044249,0051171,1901362,1901360,0009889,0110165,0034641,0010556,0050794,0044237,0044238,0042127,0008150,0043170,0006725,0071704,0019219,0009059,0009058,0046483,0034645…
TRINITY_DN2072_c2_g1_i2	nuclear protein 1b	0.117	16.837	0.635	8.374	1.013	0	3.406	12.883	1.814	44.795	8.9874	1066	1	0051252,0045786,0006366,0031323,0090304,1901576,0019222,0019438,0006807,1903506,0051726,0008285,0034654,0080090,0008283,0031326,0016070,0009987,2000112,2001141,0044260,0006139,0006357,0006351,0005575,0005634,0043231,0018130,0048523,0044249,0051171,1901362,1901360,0009889,0110165,0034641,0010556,0050794,0044237,0044238,0042127,0008150,0043170,0006725,0071704,0019219,0009059,0009058,0046483,0034645…
TRINITY_DN2072_c2_g1_i6	nuclear protein 1b	0	13.998	1.393	9.538	0	2.714	0	8.827	0	35.646	7.2116	940	1	0051252,0045786,0006366,0031323,0090304,1901576,0019222,0019438,0006807,1903506,0051726,0008285,0034654,0080090,0008283,0031326,0016070,0009987,2000112,2001141,0044260,0006139,0006357,0006351,0005575,0005634,0043231,0018130,0048523,0044249,0051171,1901362,1901360,0009889,0110165,0034641,0010556,0050794,0044237,0044238,0042127,0008150,0043170,0006725,0071704,0019219,0009059,0009058,0046483,0034645…
TRINITY_DN2_c0_g3_i1	Crystallin, beta A4	0	0	1.517	0.458	4082.09	5.839	1.064	0.172	0	0.65	409.178	857	1	0032502,0048856,0005212,0003674,0002088,0005198,0008150
TRINITY_DN670_c2_g1_i3	complement factor H-like	0	0.884	0.084	20.754	7.198	0	0.147	0	0.032	2805.56	283.466	1942	1
TRINITY_DN670_c2_g1_i2	complement factor H-like	0	0.126	0	12.223	0.308	0.042	0	0.118	0	357.224	37.0041	1608	1
TRINITY_DN154_c7_g2_i1	TRINITY_DN154_c7_g2_i1	0	0	0	1.264	5.214	0	3105.43	47.629	1.146	0	316.068	229	0
TRINITY_DN7450_c0_g1_i3	histone H3	2017.52	343.161	127.82	239.376	262.717	220.114	103.92	319.195	284.843	119.391	403.805	238	1	0043229,0044815,0005634,1901363,0032991,0000786,0032993,0043231,0003674,0003677,0110165,0097159,0046982,0046983,0005575,0005515,0003676,0043226,0043227
TRINITY_DN475_c5_g1_i2	Tubulin alpha chain	5.621	559.869	943.08	256.018	272.064	542.84	169.256	164.413	759.711	11.095	368.397	233	1	0140014,0003674,0097159,0043167,0097367,0019001,0006996,0001883,0000226,0000166,0005737,0099081,0099080,0009987,0032550,0001882,1901265,0005575,0099513,0099512,1901363,0005874,0043168,0032553,0110165,0008150,0005525,0032549,0032561,0007017,0007010,0016043,0035639,0048285,0032555,0017076,0036094,0000280,0071840
TRINITY_DN475_c5_g1_i1	tubulin alpha-3 chain	29.387	7.669	21.702	9.05	21.158	12.767	95.408	11.101	17.758	11.402	23.7402	1104	1	0140014,0003674,0097159,0043167,0097367,0019001,0006996,0001883,0000226,0000166,0005737,0099081,0099080,0009987,0032550,0001882,1901265,0005575,0099513,0099512,1901363,0005874,0043168,0032553,0110165,0008150,0005525,0032549,0032561,0007017,0007010,0016043,0035639,0048285,0032555,0017076,0036094,0000280,0071840
TRINITY_DN7957_c0_g1_i1	cytochrome c oxidase subunit 8A	679.412	169.831	493.1	229.226	675.554	883.487	250.986	228.803	227.208	31.393	386.9	368	1	0015075,0015077,0015078,0110165,0016491,0005739,0015002,0005575,0043231,0022857,0003824,0031224,0022890,0016021,0016676,0016675,0008324,0003674,0009055,0004129,0043229,0043226,0043227
TRINITY_DN24118_c0_g1_i4	Fatty acid binding protein 7	0	3.733	3356.8	63.923	203.083	1.329	1.443	3.986	210.058	204.874	404.923	866	1	0008289,0003674
TRINITY_DN24118_c0_g1_i3	Fatty acid binding protein 7	0	0.049	21.898	0.312	1.962	0	0	0	1.183	1.2	2.6604	1470	2	0008289,0003674
TRINITY_DN9853_c0_g1_i2	Fatty acid-binding protein	1.957	0	0	0.165	0.173	0.157	0.478	0	0.454	3049.28	305.267	576	1	0008289,0003674
TRINITY_DN9853_c0_g1_i3	Fatty acid binding protein 10a, liver basic	0.387	0	0	0	0	0	0	0	0.507	16.851	1.7745	308	1	0033293,0032052,0008289,0031406,0003674,0043167,0036094,0043168,0043177
TRINITY_DN9853_c0_g1_i1	Fatty acid-binding protein	0	0	0.113	0.138	0	0.133	0	0	0.381	15.928	1.6693	646	2	0008289,0003674
TRINITY_DN3302_c0_g1_i1	ATP-dependent RNA helicase DDX5 -like	2.094	345.567	203.638	213.151	434.835	795.121	88.625	325.509	304.246	166.239	287.902	3675	4	0004842,0030554,0097159,0043167,0097367,0043168,1901265,0008144,0005737,0016740,1990904,0032555,0140096,0110165,0000166,0036094,0005575,0005634,0043231,1901363,0003824,0019787,0032559,0032991,0005524,0003674,0003676,0035639,0043229,0017076,0032553,0043226,0043227
TRINITY_DN3302_c0_g1_i2	ATP-dependent RNA helicase DDX5 -like	459.657	41.125	30.203	76.029	56.058	5.768	33.411	34.138	63.407	1.088	80.0884	2443	1	0005737,1990904,0043231,0110165,0043229,0005575,0005634,0043226,0043227,0032991
TRINITY_DN3302_c0_g1_i3	ATP-dependent RNA helicase DDX5 -like	0.778	9.902	4.295	9.76	9.977	20.871	2.829	9.275	10.746	4.601	8.3034	2848	3	0016787,0016462,0016818,0017111,0032991,0005737,0043231,0016887,0016817,0003674,0110165,0003824,0043229,0005575,0005634,0043226,0043227,0004386,1990904
TRINITY_DN9_c0_g2_i1	phosphoglycerate mutase 2	4.247	13.244	507.097	74.755	399.129	541.221	52.257	131.361	94.493	14.85	183.265	1415	1	0016853,0003674,0003723,1901135,0004619,0097159,0019637,0009132,1902494,0009135,0009150,0046034,0043436,0006807,0006165,0046031,0032787,0019752,0072521,0044281,0009179,0046483,0055086,0009987,0006091,0006096,0016052,0009117,0006139,0006796,0006793,0019693,0016310,0005575,0006753,1901564,0006757,0071704,1901363,1901575,0016868,1901360,0016866,0005975,1905354,0003824,0004082,0000178,0044237,0044238…
TRINITY_DN9_c0_g2_i2	Phosphoglycerate mutase	0.364	0	2.137	0	0.544	526.749	598.583	1.502	0	0	112.988	316	1
TRINITY_DN9_c0_g2_i3	Phosphoglycerate mutase	2.359	4.621	164.785	8.745	169.497	264.337	8.848	21.508	16.583	9.423	67.0706	2311	1	0016853,1901135,0004619,0019637,0009132,0009259,0009135,0009150,0046034,0043436,0006807,0006165,0046031,0032787,0019752,0072521,0044281,0009179,0046483,0055086,0006090,0006091,0006096,0016052,0009056,0009117,0006139,0006796,0006793,0019693,0016310,0006753,1901564,0006757,0071704,0016868,1901360,0016866,0005975,0003824,0004082,1901575,0044237,0044238,0008150,0009185,0034641,0006725,0006163,0046939…
TRINITY_DN1744_c8_g1_i10	Malate dehydrogenase	51.939	220.644	266.188	165.246	243.519	675.389	59.63	45.926	47.358	392.536	216.838	1267	1	0043648,0043436,0019752,0006099,0044281,0006734,0009987,0016491,0110165,0005575,0005975,0003824,0030060,0044237,0044238,0008150,0071704,0005829,0003674,0006082,0006108,0006107,0016615,0016614,0016616
TRINITY_DN1744_c8_g1_i11	TRINITY_DN1744_c8_g1_i11	21.293	71.327	99.433	123.375	87.292	50.247	34.286	29.156	15.986	96.322	62.8717	226	0
TRINITY_DN1744_c8_g1_i8	Malate dehydrogenase	8.687	62.095	51.879	82.277	17.889	112.725	0	16.922	24.753	101.702	47.8929	2285	2	0071704,0043648,0006099,0044281,0016616,0009987,0005975,0016491,0003674,0003824,0030060,0016614,0006108,0044237,0044238,0043436,0006082,0016615,0008150,0019752
TRINITY_DN1744_c8_g1_i9	Malate dehydrogenase	0	0	0	0	60.921	24.811	50.212	5.222	2.414	0	14.358	1340	1	0043648,0043436,0019752,0006099,0044281,0006734,0009987,0016491,0110165,0005575,0005975,0003824,0030060,0044237,0044238,0008150,0071704,0005829,0003674,0006082,0006108,0006107,0016615,0016614,0016616
TRINITY_DN1744_c8_g1_i1	Malate dehydrogenase	1.582	0.579	1.179	0.351	12.467	19.377	35.745	5.015	0	0.434	7.6729	2272	2	0043648,0043436,0019752,0006099,0044281,0006734,0009987,0016491,0110165,0005575,0005975,0003824,0030060,0044237,0044238,0008150,0071704,0005829,0003674,0006082,0006108,0006107,0016615,0016614,0016616
TRINITY_DN1744_c8_g1_i2	Malate dehydrogenase	0.37	0	16.396	0	41.082	0	0	0	0	1.946	5.9794	2358	2	0071704,0043648,0006099,0044281,0016616,0009987,0005975,0016491,0003674,0003824,0030060,0016614,0006108,0044237,0044238,0043436,0006082,0016615,0008150,0019752
TRINITY_DN7375_c0_g1_i5	natterin-3-like	0	3344.45	1.628	0	0.238	0	0	0	0	0	334.631	1529	1
TRINITY_DN7375_c0_g1_i3	natterin-3-like	0	50.947	0	0	0	0	0	0	0	0	5.0947	1649	2
TRINITY_DN7375_c0_g1_i1	natterin-3-like	0	13.252	0	0	0	0.208	0	0	0	0	1.346	2464	2
TRINITY_DN7375_c0_g1_i4	natterin-3-like	0	13.253	0	0	0	0	0	0	0	0	1.3253	2344	1
TRINITY_DN2963_c0_g1_i2	FABP domain-containing protein	1.092	26.426	311.475	71.557	890.701	1601.65	301.616	184.465	86.697	79.396	355.507	748	1
TRINITY_DN2963_c0_g1_i5	Fatty acid binding protein 11a	0	0	1.86	0.409	0.613	20.216	0.844	1.742	0.364	0	2.6048	709	1	0007423,0048856,0008289,0003674,0001654,0032502,0048513,0008150
TRINITY_DN203_c0_g1_i1	Cytochrome c oxidase subunit 5Ab	16.367	135.389	169.35	109.998	360.47	1378.63	592.773	91.514	62.726	61.925	297.914	849	1	0015075,0051234,0015077,0098662,0098660,0015078,0006812,0009060,0045333,0015980,0016020,0055085,0009987,0006091,0016491,0110165,0031090,0015002,0005575,0055114,0022857,0051179,0031966,0003824,0019646,0044237,0022890,0098655,0006811,0008150,0016676,0005743,0034220,0015672,0006123,0016675,1902600,0008324,0003674,0009055,0004129,0022900,0019866,0022904
TRINITY_DN203_c0_g1_i3	Cytochrome c oxidase subunit 5Ab	0.21	60.01	50.195	57.486	37.026	106.577	107.245	21.066	19.671	11.042	47.0528	1054	1	0015075,0051234,0015077,0098662,0098660,0015078,0006812,0009060,0045333,0015980,0016020,0055085,0009987,0006091,0016491,0110165,0031090,0015002,0005575,0055114,0022857,0051179,0031966,0003824,0019646,0044237,0022890,0098655,0006811,0008150,0016676,0005743,0034220,0015672,0006123,0016675,1902600,0008324,0003674,0009055,0004129,0022900,0019866,0022904
TRINITY_DN5613_c0_g1_i6	fructose-bisphosphate aldolase b	87.541	853.542	22.027	347.549	20.926	33.631	22.498	63.326	12.253	1551.32	301.461	2389	1	1901135,0009056,0019637,0009132,0009259,0009135,0009150,0046034,0043436,0006807,0006165,0046031,0032787,0004332,0072521,0044281,0009179,0046483,0055086,0006090,0006091,0006096,0016052,0110165,0006139,0006796,0016829,0006793,0019693,0016310,0005575,0006753,0019752,1901564,0006757,0071704,1901360,0055114,0005975,0003824,1901575,0044237,0044238,0008150,0009185,0034641,0006725,0006163,0046939,0003674…
TRINITY_DN5613_c0_g1_i14	fructose-bisphosphate aldolase c	0.132	9.889	0	4.881	0.923	0.944	0	1.405	0	70.487	8.8661	2770	2	1901135,0009056,0019637,0009132,0009259,0009135,0009150,0046034,0043436,0006807,0006165,0046031,0032787,0004332,0072521,0044281,0009179,0046483,0055086,0006090,0006091,0006096,0016052,0110165,0006139,0006796,0016829,0006793,0019693,0016310,0005575,0006753,0019752,1901564,0006757,0071704,1901360,0055114,0005975,0003824,1901575,0044237,0044238,0008150,0009185,0034641,0006725,0006163,0046939,0003674…
TRINITY_DN5613_c0_g1_i16	fructose-bisphosphate aldolase b	0	13.673	0.594	5.093	0.642	1.921	0	0	0.972	33.139	5.6034	2669	1	1901135,0009056,0019637,0009132,0009259,0009135,0009150,0046034,0043436,0006807,0006165,0046031,0032787,0004332,0072521,0044281,0009179,0046483,0055086,0006090,0006091,0006096,0016052,0110165,0006139,0006796,0016829,0006793,0019693,0016310,0005575,0006753,0019752,1901564,0006757,0071704,1901360,0055114,0005975,0003824,1901575,0044237,0044238,0008150,0009185,0034641,0006725,0006163,0046939,0003674…
TRINITY_DN5613_c0_g1_i10	Fructose-bisphosphate aldolase	0	11.215	0.494	4.79	0	0.445	1.06	0.617	0.72	20.748	4.0089	2891	3	1901135,0009056,0019637,0009132,0009259,0009135,0009150,0046034,0043436,0006807,0006165,0046031,0032787,0004332,0072521,0044281,0009179,0046483,0055086,0006090,0006091,0006096,0016052,0110165,0006139,0006796,0016829,0006793,0019693,0016310,0005575,0006753,0019752,1901564,0006757,0071704,1901360,0055114,0005975,0003824,1901575,0044237,0044238,0008150,0009185,0034641,0006725,0006163,0046939,0003674…
TRINITY_DN5613_c0_g1_i11	fructose-bisphosphate aldolase b	0.041	4.775	0.1	3.31	0	0.863	0.266	0.246	0	17.239	2.684	3086	3	1901135,0009056,0019637,0009132,0009259,0009135,0009150,0046034,0043436,0006807,0006165,0046031,0032787,0004332,0072521,0044281,0009179,0046483,0055086,0006090,0006091,0006096,0016052,0110165,0006139,0006796,0016829,0006793,0019693,0016310,0005575,0006753,0019752,1901564,0006757,0071704,1901360,0055114,0005975,0003824,1901575,0044237,0044238,0008150,0009185,0034641,0006725,0006163,0046939,0003674…
TRINITY_DN2353_c0_g1_i33	complement component BFB -like	0	0.023	0.019	0.165	0	0	0	0	0.044	2574.83	257.508	2711	1
TRINITY_DN2353_c0_g1_i12	thyroid hormone receptor-associated protein 3-like	9.75	31.431	13.674	22.038	11.467	14.498	24.662	24.648	20.917	106.613	27.9698	6098	3
TRINITY_DN2353_c0_g1_i21	thyroid hormone receptor-associated protein 3-like	1.758	5.938	2.135	2.459	1.379	3.217	2.473	3.286	2.237	19.448	4.433	5905	3
TRINITY_DN2353_c0_g1_i17	complement component BFB -like	0	0	0	0	0	0	0	0	0	40.599	4.0599	2900	2
TRINITY_DN2353_c0_g1_i1	complement component BFB -like	0	0	0	0	0	0	0	0	0	24.089	2.4089	2953	2
TRINITY_DN2353_c0_g1_i19	complement factor B-like	0	0	0	0	0	0	0	0	0	22.719	2.2719	2807	2
TRINITY_DN2353_c0_g1_i37	thyroid hormone receptor-associated protein 3-like	0.545	1.515	0.227	0.413	0.337	0.405	0.844	0.67	0.233	15.252	2.0441	3736	2
TRINITY_DN2353_c0_g1_i22	complement factor B-like	0.02	0.347	0	0.027	0	0	0.041	0	0	15.946	1.6381	2368	3	0002684,0002682,0140096,0004252,0006959,0006956,0006955,0110165,0004175,0016825,0005575,0005576,0016787,0070011,0002376,0002252,0002253,0003824,0008233,0050778,0008236,0050776,0008150,0003674,0017171
TRINITY_DN2998_c1_g1_i1	polyadenylate-binding protein	265.692	283.885	172.991	184.143	153.9	361.166	64.803	507.582	240.093	356.899	259.115	2958	1	0051252,0097159,0019222,1901363,0080090,1990904,0003729,0003723,0031323,0110165,0005575,0005634,0043231,0051171,0050794,0008150,0019219,0032991,0003730,0003674,0003676,0043229,0060255,0005829,0043226,0043227
TRINITY_DN2998_c1_g1_i12	polyadenylate-binding protein 1	6.59	20.499	11.209	113.352	1.541	301.726	230.252	20.653	47.778	2.317	75.5917	2843	1	0005634,1901363,0032991,0003729,0003730,0003723,0003674,0003676,0097159,0043229,0043226,0005575,0110165,0005829,0043231,0043227,1990904
TRINITY_DN2998_c1_g1_i17	polyadenylate-binding protein	14.71	14.162	8.863	16.651	8.282	28.845	19.853	39.791	16.603	18.123	18.5883	3078	2	0051252,0097159,0019222,1901363,0080090,1990904,0003729,0003723,0031323,0110165,0005575,0005634,0043231,0051171,0050794,0008150,0019219,0032991,0003730,0003674,0003676,0043229,0060255,0005829,0043226,0043227
TRINITY_DN266_c0_g2_i1	Crystallin, beta A2b	0.896	1.077	23.016	0	3764.58	0	0.659	1.086	0.047	0	379.137	1373	1	0002088,0048856,0008150,0032502
TRINITY_DN1758_c1_g1_i12	pancreatic progenitor cell differentiation and proliferation factor A-like	0.374	0.694	1.668	4.989	234.744	167.802	485.508	1.614	9.426	899.279	180.61	745	1	0048869,0009987,0048856,0032501,0032502,0030154,0007275,0008150
TRINITY_DN1758_c1_g1_i10	pancreatic progenitor cell differentiation and proliferation factor A-like	0	0.738	0.52	3.66	99.288	104.769	177.39	1.932	0.706	315.938	70.4941	480	1
TRINITY_DN1758_c1_g1_i3	g8 domain-containing protein DDB G0288475 -like	0.155	0.342	0.723	0.907	80.83	32.143	123.432	0.214	3.963	207.188	44.9897	544	1
TRINITY_DN1758_c1_g1_i6	g8 domain-containing protein DDB G0288475 -like	0	0	0.136	0	15.858	4.658	29.468	0.548	1.165	42.406	9.4239	612	1
TRINITY_DN1758_c1_g1_i4	pancreatic progenitor cell differentiation and proliferation factor A-like	0	0.062	0.158	0.347	1.07	1.533	1.793	0.131	0.03	21.282	2.6406	2057	1	0048869,0009987,0048856,0032501,0032502,0030154,0007275,0008150
TRINITY_DN1758_c1_g1_i9	pancreatic progenitor cell differentiation and proliferation factor A-like	0	0	0	0	0.595	3.791	4.446	0.065	0	13.771	2.2668	1795	1	0048869,0009987,0048856,0032501,0032502,0030154,0007275,0008150
TRINITY_DN230_c16_g1_i1	Ubiquinol-cytochrome c reductase, complex III subunit X	293.409	187.982	283.055	168.993	376.714	863.882	826.578	184.93	125.696	108.732	341.997	516	1	0033108,0031224,0070069,0009060,1902494,0045333,0045275,0043933,0015980,0005750,0009987,0006091,0110165,0017062,0005575,0034551,1990204,0055114,0098803,0098800,0044237,0065003,0016021,0008150,0006122,0032991,0098796,0016043,0034622,0022900,0017004,0022607,0022904,0071840
TRINITY_DN7996_c0_g1_i1	MNLL subunit family member	43.526	209.676	324.448	201.058	365.004	1093.78	784.695	126.236	153.08	90.55	339.205	369	1	0030964,0005747,0032991,1990204,0098796,0016651,0098803,0098800,0003674,0003824,0045271,1902494,0016491,0005575,0003954
TRINITY_DN1810_c0_g1_i15	14-3-3 protein theta	424.578	271.357	685.575	153.631	298.719	105.372	255.743	1142.71	153.604	73.075	356.437	2084	2
TRINITY_DN1810_c0_g1_i21	14-3-3 protein theta	4.773	5.188	7.9	2.779	3.892	2.673	3.441	22.72	1.949	1.155	5.647	8776	4
TRINITY_DN1810_c0_g1_i27	14-3-3 protein theta	2.615	0.185	13.797	0	6.207	2.765	0	3.106	0	0	2.8675	2203	2
TRINITY_DN1888_c1_g1_i21	LIM zinc-binding domain-containing protein	3.638	252.624	272.984	345.635	78.359	665.72	233.952	164.604	1596.04	9.956	362.351	621	1	0043169,0046872,0003674,0043167
TRINITY_DN1888_c1_g1_i15	Cysteine-rich intestinal protein 1	0.127	4.027	1.264	5.873	0.256	9.275	3.137	3.071	19.249	0	4.6279	1349	1	0043167,0008270,0097159,0006974,0008150,0097190,0097193,0043169,0071236,0008630,0005737,0009314,0010043,0009987,0110165,0071482,0003680,0005575,0007165,0010224,0009411,1901363,0009416,0043565,0071493,0042277,0010035,0071478,0050794,1990837,0046677,0033218,0035556,0008301,0034644,0104004,0003674,0003677,0003676,0010038,0046872,0003690,0046914
TRINITY_DN10869_c0_g1_i22	Integral membrane protein 2Bb	73.446	503.382	255.014	413.27	213.89	370.535	183.756	405.081	354.83	380.611	315.382	1698	1	0005794,0005886,0005773,0110165,0043229,0043226,0031224,0005575,0016020,0016021,0043231,0043227
TRINITY_DN10869_c0_g1_i18	BRICHOS domain-containing protein	7.139	52.689	23.222	29.957	8.839	27.158	14.298	84.908	37.314	22.856	30.838	1719	1	0005794,0005886,0005773,0110165,0043229,0043226,0005575,0016020,0043231,0043227
TRINITY_DN1512_c0_g1_i7	Guanylate cyclase activator 1B	0	0	0.07	0	3655.56	0.058	0	0	0.165	0	365.585	1213	1
TRINITY_DN1512_c0_g1_i8	Guanylate cyclase activator 1B	0.071	0	0.213	0.1	22.982	0	0	0	0	0	2.3366	802	2	0098772,0005509,0010853,0030234,0003674,0030249,0008047,0043167,0043169,0010851,0046872,0008048,0030250
TRINITY_DN1512_c0_g1_i5	Guanylyl cyclase-activating protein 2	0	0	0	0	17.77	0	0	0	0	0	1.777	1852	2	0098772,0005509,0010853,0030234,0003674,0030249,0008047,0043167,0043169,0010851,0046872,0008048,0030250
TRINITY_DN712_c0_g1_i1	Cytochrome c oxidase subunit 7A2	238	273.864	574.904	294.153	702.952	698.512	134.226	227.622	211.707	46.379	340.232	617	1	0015075,0015077,0016676,0016675,0008324,0022857,0015078,0003674,0016491,0110165,0003824,0004129,0009055,0015002,0022890,0005575,0070469,0005746
TRINITY_DN712_c0_g1_i3	cytochrome c oxidase subunit 7A2, mitochondrial	0.281	14.65	11.965	17.133	19.932	33.267	7.191	20.467	20.561	16.091	16.1538	2043	2	0015075,0015077,0016676,0016675,0008324,0022857,0015078,0003674,0016491,0110165,0003824,0004129,0009055,0015002,0022890,0005575,0070469,0005746
TRINITY_DN4955_c0_g1_i2	succinate dehydrogenase cytochrome b560 subunit, mitochondrial	158.318	232.363	320.36	227.68	374.364	1116.49	501.383	154.804	164.02	140.442	339.022	766	1	0043226,0110165,0043229,0005575,0005739,0043231,0043227
TRINITY_DN5532_c0_g1_i12	TRINITY_DN5532_c0_g1_i12	34.403	314.167	140.764	214.577	171.048	169.476	381.96	954.84	277.138	121.46	277.983	283	0
TRINITY_DN5532_c0_g1_i18	TRINITY_DN5532_c0_g1_i18	8.243	30.514	61.41	107.706	41.678	35.858	72.74	211.474	80.707	22.984	67.3314	481	0
TRINITY_DN12027_c0_g1_i2	TRINITY_DN12027_c0_g1_i2	2.2	887.659	201.631	410.91	86.535	287.213	208.972	475.03	793.585	119.286	347.302	1196	0
TRINITY_DN6595_c0_g1_i15	Cathepsin L	138.46	126.144	271.698	243.836	187.873	590.743	800.298	270.973	337.774	308.351	327.615	1466	1	0051603,0004197,0006807,0019538,0005773,0140096,0006955,0110165,0006508,0004175,0005575,0005615,1901564,0016787,0070011,0002376,0003824,0008233,0008234,0044238,0008150,0043170,0071704,0043231,0003674,0043229,0000323,0005764,0043226,0043227
TRINITY_DN316_c5_g1_i1	Putative septin-8	117.253	229.415	269.782	189.383	113.352	509.199	882.02	287.296	329.129	316.977	324.381	2043	2	0140014,0000307,0019001,1904029,0032555,0009987,0032550,0140096,0001882,0032553,0006796,0098772,1901363,1902911,0031399,0044237,0044238,0032991,0060255,0032561,0016538,0048285,0019900,0036094,0006464,0004672,0043168,0042325,0044772,0001932,0016740,0080090,0061695,0005575,1990234,0043231,1901564,0043549,0004674,0032268,0019901,0008150,0019887,0016043,0043229,0017076,0043226,0000280,0097472,1902494…
TRINITY_DN4285_c0_g1_i9	Testis enhanced transcript BAX inhibitor 1	25.606	181.964	163.774	311.155	82.432	60.321	96.067	96.22	125.404	142.161	128.51	1201	2	0060548,0110165,0043066,0043067,0042981,0050794,0031224,0043069,0005575,0010941,0016021,0008150,0048523
TRINITY_DN4285_c0_g1_i7	Bax inhibitor 1	51.913	200.693	158.379	103.563	96.826	78.614	62.698	39.789	81.55	269.689	114.371	2125	1	0005789,0043066,0043067,0010941,0043069,0006915,0060548,0009987,0110165,0031090,0005575,0048523,0012501,0008219,0050794,0031224,0016020,0016021,0008150,0035966,0006986,0042981,0010033
TRINITY_DN4285_c0_g1_i2	Testis enhanced transcript BAX inhibitor 1	7.411	156.773	131.97	214.586	56.082	73.292	50.859	66.029	105.253	77.766	94.0021	1606	1
TRINITY_DN1729_c1_g1_i1	creatine kinase, flagellar	0	1.165	0.334	0.081	151.571	762.962	564.436	5.289	0.226	0.572	148.664	944	1	0090407,0030554,0097159,0046314,0043167,0097367,0043168,0006807,1901265,0008144,0016740,0004111,0032559,0032555,0009987,0016772,0032553,0006796,0000166,0006793,1901564,1901566,0071704,1901363,1901576,0003824,0044237,0006599,0008150,0006603,0009058,0005524,0019637,0042398,0042396,0003674,0016775,0035639,0006575,0017076,0036094,0016301
TRINITY_DN1729_c1_g1_i3	Ckmt2 protein -related	0	0	0	0	107.577	357.756	515.321	1.53	0	0	98.2184	1766	1	0016740,0016772,0043231,0003674,0005739,0003824,0043229,0005575,0016301,0110165,0043226,0043227
TRINITY_DN1729_c1_g1_i7	creatine kinase S-type, mitochondrial	0	305.452	38.082	3.946	0.825	0.135	0	0.387	17.045	5.202	37.1074	1382	1	0090407,0030554,0097159,0046314,0043167,0043168,0097367,0006807,0005739,0008144,0016740,0004111,0032559,0032555,0009987,0016772,1901265,0006796,0000166,0006793,0005575,0043231,1901564,1901566,1901576,1901363,0003824,0071704,0044237,0110165,0006599,0008150,0006603,0009058,0005524,0019637,0042398,0042396,0003674,0032553,0016775,0035639,0043229,0006575,0017076,0036094,0016301,0043226,0043227
TRINITY_DN1729_c1_g1_i8	Ckmt2 protein -related	0	74.526	8.434	0.379	13.504	1.337	0.306	0.086	2.327	4.676	10.5575	2977	2	0090407,0030554,0097159,0046314,0043167,0043168,0097367,0006807,1901265,0008144,0016740,0004111,0032559,0032555,0009987,0016772,0005739,0006796,0000166,0006793,0005575,0043231,1901564,1901566,1901576,1901363,0003824,0032553,0044237,0110165,0006599,0006603,0008150,0071704,0009058,0005524,0019637,0042398,0042396,0003674,0016775,0035639,0043229,0006575,0017076,0036094,0016301,0043226,0043227
TRINITY_DN1729_c1_g1_i14	creatine kinase, flagellar	0	0	0.014	0	1.104	60.253	7.718	0.138	0	0	6.9227	3718	3	0090407,0019637,0006807,0016740,0004111,0009987,0006796,0006793,0046314,1901564,1901566,0006603,1901576,0003824,0044237,0006599,0008150,0071704,0009058,0042396,0016772,0042398,0003674,0016775,0006575,0016301
TRINITY_DN1729_c1_g1_i13	Ckmt2 protein -related	0	0	0	0	61.738	1.859	0.211	0	0	0	6.3808	1520	1	0016740,0016772,0043231,0003674,0005739,0003824,0043229,0005575,0016301,0110165,0043226,0043227
TRINITY_DN1729_c1_g1_i15	creatine kinase, flagellar	0	0	0	0	0	19.21	13.911	0.292	0	0	3.3413	2989	1	0090407,0030554,0097159,0046314,0043167,0097367,0043168,0006807,1901265,0008144,0016740,0004111,0032559,0032555,0009987,0016772,0032553,0006796,0000166,0006793,1901564,1901566,0071704,1901363,1901576,0003824,0044237,0006599,0008150,0006603,0009058,0005524,0019637,0042398,0042396,0003674,0016775,0035639,0006575,0017076,0036094,0016301
TRINITY_DN1729_c1_g1_i4	Ckmt2 protein -related	0	0	0	0	1.852	23.624	3.214	0	0	0	2.869	1948	1	0016740,0016772,0043231,0003674,0005739,0003824,0043229,0005575,0016301,0110165,0043226,0043227
TRINITY_DN9481_c0_g1_i3	eukaryotic translation initiation factor 3 subunit F	159.434	373.252	261.859	275.139	199.122	356.214	395.35	315.638	401.74	565.225	330.297	992	1	1901576,0071704,0009059,0009058,0034645,0009987,0003674,0006413,0005515,0044260,0044249,0044237,0006414,0031369,0008150,0043170
TRINITY_DN517_c6_g1_i9	fibrinogen alpha chain	0.422	4.47	1.486	5.389	3.814	4.1	2.462	4.693	6.585	2750.99	278.441	4835	3	0051258,0065003,0006807,0072378,0030168,0022607,0005102,0072376,0005515,0005575,0005577,1901564,0044238,0043933,0008150,0043170,0071704,0032991,0019538,0003674,0016043,0001775,0034622,0009987,0071840
TRINITY_DN517_c6_g1_i4	fibrinogen alpha chain	0	0.107	1.182	0.091	0.302	0.091	0	0.394	0.249	58.456	6.0872	5137	4	0051258,0065003,0006807,0072378,0030168,0022607,0005102,0072376,0005515,0005575,0005577,1901564,0044238,0043933,0008150,0043170,0071704,0032991,0019538,0003674,0016043,0001775,0034622,0009987,0071840
TRINITY_DN13834_c0_g1_i3	tubulin alpha-3 chain	971.112	252.763	270.632	133.666	245.675	354.058	476.773	415.068	200.781	47.118	336.765	453	1	0140014,0003674,0097159,0043167,0006996,0019001,0043168,0001883,0000226,0000166,0005737,0099081,0032555,0009987,0032550,0001882,1901265,0005575,0097367,0099512,1901363,0005874,0032553,0110165,0008150,0005525,0032549,0032561,0099513,0007017,0007010,0016043,0035639,0048285,0099080,0017076,0036094,0000280,0071840
TRINITY_DN13834_c0_g1_i4	tubulin alpha-3 chain	0.177	0.234	64.911	0	10.625	0	0.362	0.236	0.682	0	7.7227	453	1	0140014,0003674,0097159,0043167,0006996,0019001,0043168,0001883,0000226,0000166,0005737,0099081,0032555,0009987,0032550,0001882,1901265,0005575,0097367,0099512,1901363,0005874,0032553,0110165,0008150,0005525,0032549,0032561,0099513,0007017,0007010,0016043,0035639,0048285,0099080,0017076,0036094,0000280,0071840
TRINITY_DN605_c0_g1_i5	Putative ES1 protein-like	0.11	2809.87	5.922	372.788	0	0	1.465	3.422	0	4.595	319.817	971	1
TRINITY_DN1732_c0_g1_i7	NADH dehydrogenase ubiquinone 1 alpha subcomplex subunit 3	245.517	220.959	321.15	220.612	337.461	819.168	562.83	145.237	164.754	207.348	324.504	388	1	0030964,0005747,0032991,1990204,0098796,0098803,0098800,0110165,0045271,1902494,0031224,0005575,0016021
TRINITY_DN2333_c0_g1_i4	Small cytokines intecrine/chemokine , interleukin-8 like domain containing protein	1.394	26.889	22.79	1022.59	19.54	1.47	36.102	44.453	193.279	1129.12	249.762	1082	1	0071310,0019221,0005515,0071356,0051336,0110165,0009987,0044093,0008009,0005126,0005125,0005102,0006955,0006954,0048018,0001664,0034612,0005575,0005615,0007166,0098772,0043547,0030545,0002376,0042379,0030546,0007186,0051345,0050790,0050794,0071345,0008150,0070098,0007165,0003674,0034097,0006952,0010033,0043087,0043085
TRINITY_DN2333_c0_g1_i2	Small cytokines intecrine/chemokine , interleukin-8 like domain containing protein	0	7.145	2.582	160.982	2.153	0	7.122	24.578	20.2	52.509	27.7271	984	1	0071310,0019221,0005515,0071356,0051336,0110165,0009987,0044093,0008009,0005126,0005125,0005102,0006955,0006954,0048018,0001664,0034612,0005575,0005615,0007166,0098772,0043547,0030545,0002376,0042379,0030546,0007186,0051345,0050790,0050794,0071345,0008150,0070098,0007165,0003674,0034097,0006952,0010033,0043087,0043085
TRINITY_DN2333_c0_g1_i5	Small cytokines intecrine/chemokine , interleukin-8 like domain containing protein	0.067	5.115	3.538	85.807	0.462	0	2.813	9.25	9.856	130.481	24.7389	1385	1	0071310,0019221,0005515,0071356,0051336,0110165,0009987,0044093,0008009,0005126,0005125,0005102,0006955,0006954,0048018,0001664,0034612,0005575,0005615,0007166,0098772,0043547,0030545,0002376,0042379,0030546,0007186,0051345,0050790,0050794,0071345,0008150,0070098,0007165,0003674,0034097,0006952,0010033,0043087,0043085
TRINITY_DN2333_c0_g1_i1	Small cytokines intecrine/chemokine , interleukin-8 like domain containing protein	0	0	0	29.165	3.491	0	0	0.654	5.259	56.579	9.5148	1277	1	0071310,0019221,0005515,0071356,0051336,0110165,0009987,0044093,0008009,0005126,0005125,0005102,0006955,0006954,0048018,0001664,0034612,0005575,0005615,0007166,0098772,0043547,0030545,0002376,0042379,0030546,0007186,0051345,0050790,0050794,0071345,0008150,0070098,0007165,0003674,0034097,0006952,0010033,0043087,0043085
TRINITY_DN650_c0_g1_i5	tubulin beta chain	995.381	124.305	877.506	75.484	419.665	199.101	181.059	153.651	82.109	46.069	315.433	971	1	0140014,0003674,0097159,0043167,0006996,0019001,0043168,0001883,0000226,0000166,0005737,0099081,0032555,0009987,0032550,0001882,1901265,0005575,0097367,0099512,1901363,0005874,0032553,0110165,0008150,0005525,0032549,0032561,0099513,0007017,0007010,0016043,0035639,0048285,0099080,0017076,0036094,0000280,0071840
TRINITY_DN650_c0_g1_i4	tubulin beta-2A chain	0	0	190.913	0	66.493	0	0.076	0.539	0.096	0	25.8117	1363	1	0140014,0007010,0097159,0040011,0043167,0043168,0019001,0097367,0001883,0000226,0000166,0005737,0016477,0099081,0099080,0009987,0032550,0001882,1901265,0048870,0005575,0099513,0099512,0006996,1901363,0005874,0001764,0032553,0110165,0008150,0005525,0032549,0032561,0007017,0003674,0016043,0035639,0048285,0032555,0017076,0036094,0000280,0071840
TRINITY_DN650_c0_g1_i2	tubulin beta chain	33.74	0.436	7.096	0.399	2.566	0.447	1.446	6.008	0.515	1.185	5.3838	1386	1	0140014,0003674,0097159,0043167,0006996,0019001,0043168,0001883,0000226,0000166,0005737,0099081,0032555,0009987,0032550,0001882,1901265,0005575,0097367,0099512,1901363,0005874,0032553,0110165,0008150,0005525,0032549,0032561,0099513,0007017,0007010,0016043,0035639,0048285,0099080,0017076,0036094,0000280,0071840
TRINITY_DN650_c0_g1_i1	tubulin beta chain	0	0	1.025	1.181	0.438	3.04	0	0.128	28.477	0.201	3.449	1327	1	0140014,0003674,0097159,0043167,0006996,0019001,0043168,0001883,0000226,0000166,0005737,0099081,0032555,0009987,0032550,0001882,1901265,0005575,0097367,0099512,1901363,0005874,0032553,0110165,0008150,0005525,0032549,0032561,0099513,0007017,0007010,0016043,0035639,0048285,0099080,0017076,0036094,0000280,0071840
TRINITY_DN650_c0_g1_i7	tubulin beta chain	2.531	1.724	0.44	0.207	19.291	0.213	7.155	0	0.623	1.714	3.3898	1327	1	0140014,0003674,0097159,0043167,0006996,0019001,0043168,0001883,0000226,0000166,0005737,0099081,0032555,0009987,0032550,0001882,1901265,0005575,0097367,0099512,1901363,0005874,0032553,0110165,0008150,0005525,0032549,0032561,0099513,0007017,0007010,0016043,0035639,0048285,0099080,0017076,0036094,0000280,0071840
TRINITY_DN11197_c0_g1_i3	ATP synthase F 0 complex subunit C3, mitochondrial	123.399	90.585	233.533	181.337	227.486	794.639	859.272	124.708	77.028	65.213	277.72	1918	2	0015252,0044237,0044238,0046034,0009117,0016887,0009987,0009199,0019693,0018130,1901362,1901360,0034220,0009205,0009201,0022890,0033177,0017111,0032991,0006163,0009165,0006164,1901564,0015399,0022804,0009259,0015075,0015077,0098662,0098660,0015078,0090407,0019637,0019438,0015985,0015986,0022803,0016740,0044281,0072521,0015267,0072522,0005261,0005575,0006753,0006754,1901566,0009260,0008150,1901576…
TRINITY_DN11197_c0_g1_i4	ATP synthase F 0 complex subunit C3, mitochondrial	13.775	7.42	16.468	7.336	18.35	69	46.344	6.31	3.9	6.384	19.5287	1721	2	0015252,0044237,0044238,0046034,0009117,0016887,0009987,0009199,0019693,0018130,1901362,1901360,0034220,0009205,0009201,0022890,0033177,0017111,0032991,0006163,0009165,0006164,1901564,0015399,0022804,0009259,0015075,0015077,0098662,0098660,0015078,0090407,0019637,0019438,0015985,0015986,0022803,0016740,0044281,0072521,0015267,0072522,0005261,0005575,0006753,0006754,1901566,0009260,0008150,1901576…
TRINITY_DN11197_c0_g1_i2	ATP synthase F 0 complex subunit C3, mitochondrial	55.499	8.992	10.835	6.48	18.645	43.581	24.134	9.099	4.631	2.086	18.3982	2036	2	0015252,0044237,0044238,0046034,0009117,0016887,0009987,0009199,0019693,0018130,1901362,1901360,0034220,0009205,0009201,0022890,0033177,0017111,0032991,0006163,0009165,0006164,1901564,0015399,0022804,0009259,0015075,0015077,0098662,0098660,0015078,0090407,0019637,0019438,0015985,0015986,0022803,0016740,0044281,0072521,0015267,0072522,0005261,0005575,0006753,0006754,1901566,0009260,0008150,1901576…
TRINITY_DN9114_c0_g1_i3	TRINITY_DN9114_c0_g1_i3	63.963	1075.9	143.843	198.909	110.777	190.188	806.214	208.558	122.643	174.473	309.546	882	0
TRINITY_DN6931_c0_g1_i17	T-complex protein 1 subunit alpha	218.945	116.159	175.824	183.837	133.696	332.571	466.699	176.369	176.208	51.399	203.171	1135	2	0101031,0030554,0097159,0043167,0097367,0043168,0032553,0008144,0032559,0032555,0009987,1901265,0000166,0005832,0005575,0005515,1901363,0051082,0008150,0032991,0006457,0005524,0003674,0035639,0017076,0036094
TRINITY_DN6931_c0_g1_i5	T-complex protein 1 subunit alpha	136.99	28.684	68.946	25.767	56.597	94.723	179.277	47.377	45.371	28	71.1732	1427	1	0101031,0030554,0097159,0043167,0097367,0043168,0005515,0070121,1901265,0032559,0032555,0009987,0032553,0008144,0005832,0005575,1901363,0048856,0032502,0051082,0008150,0032991,0006457,0005524,0003674,0035639,0000166,0017076,0036094
TRINITY_DN6931_c0_g1_i13	T-complex protein 1 subunit alpha	95.67	37.321	57.365	24.553	42.541	58.294	85.017	41.391	32.766	34.441	50.9359	4001	2	0016740,0016747,0016746,0043226,0005832,0003674,0005739,0003824,0043229,0101031,0005575,0110165,0043231,0043227,0032991
TRINITY_DN4822_c0_g1_i7	cathepsin S	0	0	0	0	0	0	0	0	0.096	2718.95	271.904	786	1	0051603,0004197,0006807,0019538,0005773,0140096,0006955,0110165,0006508,0004175,0005575,0005615,1901564,0016787,0070011,0002376,0003824,0008233,0008234,0044238,0008150,0043170,0071704,0043231,0003674,0043229,0000323,0005764,0043226,0043227
TRINITY_DN4822_c0_g1_i5	cathepsin L1	0.056	0	0	0	0	0	0	0	0	16.344	1.64	1694	2	0051603,0004197,0006807,0019538,0005773,0140096,0006955,0110165,0006508,0004175,0005575,0005615,1901564,0016787,0070011,0002376,0003824,0008233,0008234,0044238,0008150,0043170,0071704,0043231,0003674,0043229,0000323,0005764,0043226,0043227
TRINITY_DN4822_c0_g1_i1	Papain family cysteine protease domain containing protein	0	0	0	0	0	0	0	0	0	14.719	1.4719	1360	2	0051603,0004197,0006807,0019538,0005773,0140096,0006955,0110165,0006508,0004175,0005575,0005615,1901564,0016787,0070011,0002376,0003824,0008233,0008234,0044238,0008150,0043170,0071704,0043231,0003674,0043229,0000323,0005764,0043226,0043227
TRINITY_DN139_c2_g3_i3	keratin 93 -like	14.876	729.195	212.53	213.898	50.519	920.302	202.173	294.008	152.125	277.431	306.706	1594	1
TRINITY_DN139_c2_g3_i5	keratin 93 -like	0.516	14.016	5.51	11.668	3.691	50.439	5.186	9.975	5.722	7.252	11.3975	2050	2
TRINITY_DN2214_c0_g1_i9	tetraspanin-8-like	33.922	582.148	188.365	446.062	77.192	244.625	107.246	453.183	342.881	687.48	316.31	1877	1	0005887,0110165,0031226,0031224,0005575,0016021,0005623
TRINITY_DN1602_c1_g1_i4	TRINITY_DN1602_c1_g1_i4	1.213	1266.43	138.858	220.648	43.336	272.311	70.011	458.611	467.89	196.653	313.596	259	0
TRINITY_DN1602_c1_g1_i6	TRINITY_DN1602_c1_g1_i6	0	25.714	3.207	17.448	0	1.463	0	3.743	7.865	1.827	6.1267	269	0
TRINITY_DN1602_c1_g1_i3	TRINITY_DN1602_c1_g1_i3	0	6.819	0	0.918	1.887	0	3.988	10.395	0	0	2.4007	255	0
TRINITY_DN7085_c0_g1_i7	Vitronectin b	0	0.074	0.827	0.152	169.716	0	0	0.036	0.108	2541.06	271.197	1743	1	0016787,0070011,0009987,0004222,0038024,0005044,0002376,0030198,0003674,0140096,0006955,0030247,0003824,0004175,0008233,0043062,0008237,0016043,0030246,0008150,0071840
TRINITY_DN7085_c0_g1_i3	Vitronectin b	0	0	0	0	0.67	0	0	0	0	22.478	2.3148	1867	2	0016787,0070011,0009987,0004222,0038024,0005044,0002376,0030198,0003674,0140096,0006955,0030247,0003824,0004175,0008233,0043062,0008237,0016043,0030246,0008150,0071840
TRINITY_DN7085_c0_g1_i8	Vitronectin b	0	0	0	0	0.271	0	0	0	0	13.643	1.3914	2124	2	0005044,0002376,0003674,0006955,0030247,0038024,0030246,0008150
TRINITY_DN2144_c4_g1_i1	low affinity immunoglobulin gamma Fc region receptor II-A	0.866	480.716	39.039	148.032	18.98	92.982	26.091	102.424	222.305	45.534	117.697	1787	0
TRINITY_DN2144_c4_g1_i18	TRINITY_DN2144_c4_g1_i18	0.132	312.388	26.293	116.714	5.255	49.787	11.293	87.394	118.959	35.046	76.3261	883	0
TRINITY_DN2144_c4_g1_i23	early nodulin-11	0.343	262.334	14.024	126.544	4.116	19.974	8.702	70.479	65.099	23.777	59.5392	2494	1
TRINITY_DN2144_c4_g1_i17	TRINITY_DN2144_c4_g1_i17	0.997	116.091	7.318	0	7.731	34.919	15.303	7.472	103.26	0	29.3091	314	0
TRINITY_DN2144_c4_g1_i9	TRINITY_DN2144_c4_g1_i9	3.986	110.025	5.91	26.4	6.159	4.666	11.296	32.361	30.007	2.245	23.3055	721	0
TRINITY_DN2144_c4_g1_i25	MHC class I antigen	0.136	31.84	2.916	12.137	1.103	6.818	0.789	8.389	20.64	4.587	8.9355	1213	1	0005575,0031224,0016021,0110165
TRINITY_DN2144_c4_g1_i5	MLt-TeN Mlt-10 related	0	15.194	1.55	5.742	1.174	3.215	0	10.983	11.381	0	4.9239	306	1
TRINITY_DN2144_c4_g1_i11	TRINITY_DN2144_c4_g1_i11	0.26	12.867	0	1.303	0.225	0.452	0.628	3.302	1.007	1.011	2.1055	490	0
TRINITY_DN2144_c4_g1_i19	TRINITY_DN2144_c4_g1_i19	0	0.972	0	0.442	0	0.716	1.285	0.707	1.799	0	0.5921	428	0
TRINITY_DN2650_c5_g1_i1	actin, aortic smooth muscle	0	0	0	0	1.911	0	2576.38	57.026	1.34	0	263.666	371	1	0048869,0005865,0030554,0097159,0032432,0043167,0097367,0055001,0043168,0030240,0055002,0008144,0005737,0048468,0097517,0099081,0099080,0009987,0097435,1901265,0071840,0000166,0001725,0005575,0005615,0099512,0043232,0048741,1901363,0005813,0048856,0005938,0005815,0005814,0032502,0032553,0042641,0036094,0110165,0099738,0008150,0032559,0099568,0005884,0005524,0007015,0099513,0003674,0014904,0035639…
TRINITY_DN2650_c5_g1_i2	actin, alpha skeletal muscle	0	0	0.042	0	0.161	0	28.831	1.044	0	0	3.0078	1379	2	0030554,0097159,0032432,0043167,0043168,0097367,0032553,0008144,0005737,0015629,0032559,0097517,0099081,0099080,1901265,0000166,0001725,0005575,0099513,0099512,0043232,0005856,1901363,0005813,0005938,0005815,0005814,0042641,0110165,0099738,0099568,0005884,0005524,0003674,0035639,0043228,0043229,0032555,0017076,0036094,0043226
TRINITY_DN136_c0_g1_i2	cofilin-1-A-like	105.713	92.304	40.229	233.076	168.186	43.113	362.964	1674.4	532.539	8.327	326.086	1301	1
TRINITY_DN136_c0_g1_i1	cofilin-1-A-like	0.465	5.365	0.688	4.506	3.749	1.074	4.629	29.422	14.842	0.2	6.494	2179	1
TRINITY_DN9214_c0_g1_i1	TRINITY_DN9214_c0_g1_i1	1448.66	0	0	0.814	0	0.759	0	7.107	0	0	145.734	434	0
TRINITY_DN9214_c0_g1_i22	TRINITY_DN9214_c0_g1_i22	1207.64	0	0	0	0.576	1.038	0.403	2.231	0	0	121.189	428	0
TRINITY_DN9214_c0_g1_i5	TRINITY_DN9214_c0_g1_i5	463.617	0.256	0	0	0	0.512	0	0.777	0	0	46.5162	431	0
TRINITY_DN9214_c0_g1_i3	TRINITY_DN9214_c0_g1_i3	232.723	0	0	0	0	0	0	2.216	0	0	23.4939	570	0
TRINITY_DN9214_c0_g1_i21	TRINITY_DN9214_c0_g1_i21	188.856	0	0	0	0	0	0.465	0.712	0	0	19.0033	398	0
TRINITY_DN9214_c0_g1_i23	TRINITY_DN9214_c0_g1_i23	38.596	0	0	0	0	0	0	1.192	0	0	3.9788	367	0
TRINITY_DN14969_c0_g1_i1	TRINITY_DN14969_c0_g1_i1	1.012	1111.34	121.745	315.887	76.957	177.186	168.108	604.3	487.333	132.982	319.685	749	0
TRINITY_DN17791_c1_g2_i2	cytochrome c oxidase subunit 7A-related protein, mitochondrial	67.838	168.887	100.45	134.469	192.651	747.562	1158.93	178.643	87.877	123.433	296.074	726	1	0005575,0070469,0005746,0110165
TRINITY_DN18216_c0_g1_i1	NADH ubiquinone oxidoreductase subunit B10	183.29	127.998	182.574	149.7	302.713	936.257	869.924	111.079	106.523	80.156	305.021	660	1	0030964,0005747,0032991,1990204,0098796,0098803,0098800,0045271,1902494,0005575
TRINITY_DN3823_c0_g1_i3	eukaryotic translation initiation factor 1	347.362	264.41	302.302	238.322	356.514	294.207	566.21	192.176	282.888	278.465	312.286	1811	1	0022627,0015935,0003723,0003674,0003676,0097159,1990904,0005575,1901363,0044391,0032991
TRINITY_DN2027_c0_g2_i4	CD63 antigen	15.926	580.735	179.5	450.909	38.845	377.284	160.479	152.676	465.615	645.459	306.743	1536	1	0005887,0110165,0031226,0031224,0005575,0016021,0005623
TRINITY_DN3980_c0_g1_i3	Putative C-C motif chemokine 28	0	0.386	0.473	0.397	131.61	0.451	636.811	2378.07	0.906	0	314.91	1244	1	0098772,0005102,0008009,0001664,0002376,0042379,0030546,0003674,0006955,0110165,0048018,0030545,0005575,0005126,0005515,0005576,0005125,0008150
TRINITY_DN3980_c0_g1_i1	Putative C-C motif chemokine 28	0	0	0	0	1.654	0	4.571	18.562	0	0	2.4787	1627	1	0098772,0005102,0008009,0001664,0002376,0042379,0030546,0003674,0006955,0110165,0048018,0030545,0005575,0005126,0005515,0005576,0005125,0008150
TRINITY_DN730_c0_g1_i9	cyclin-dependent kinase 11B-like	0	0	3014.42	0	30.777	0.168	0	0.16	0	0	304.553	904	1
TRINITY_DN730_c0_g1_i34	hypothetical protein	0	0.072	275.315	0	3.467	0	0	0	0.07	0	27.8924	1002	1
TRINITY_DN730_c0_g1_i28	hypothetical protein	0	0.23	41.849	0	0	0	0	0	0	0	4.2079	707	1
TRINITY_DN730_c0_g1_i22	TRINITY_DN730_c0_g1_i22	0	0	36.232	0	0.457	0	0	0	0.057	0.187	3.6933	1700	0
TRINITY_DN730_c0_g1_i3	hypothetical protein	0	0	35.865	0	0.783	0	0	0	0.059	0	3.6707	1152	1
TRINITY_DN730_c0_g1_i37	TRINITY_DN730_c0_g1_i37	0	0	25.553	0	0.244	0	0	0	0	0	2.5797	468	0
TRINITY_DN730_c0_g1_i2	cyclin-dependent kinase 11B-like	0	0	22.176	0	0.454	0	0	0	0.049	0	2.2679	1846	1
TRINITY_DN730_c0_g1_i45	hypothetical protein	0	0	14.342	0	0.539	0	0	0	0	0	1.4881	1954	1
TRINITY_DN730_c0_g1_i38	hypothetical protein	0	0.091	14.717	0	0	0	0	0	0	0	1.4808	834	1
TRINITY_DN730_c0_g1_i40	TRINITY_DN730_c0_g1_i40	0	0	11.579	0	0.127	0	0	0	0.111	0	1.1817	707	0
TRINITY_DN8190_c1_g1_i3	retinal cone rhodopsin-sensitive cGMP 3',5'-cyclic phosphodiesterase subunit gamma-like	0	0	1.071	0	3312.01	0	0	0	0	0	331.309	797	1	0023014,0019001,0032555,0031401,0032553,0006796,0007165,0009967,0009966,1901363,1902533,0045860,0031399,0044237,0044238,0032561,0010646,0010647,0010562,0060255,0030553,0030551,0045937,0043168,0042325,0042327,0032270,0001932,0001934,0050953,0008081,1901564,0048522,0043549,0032501,0036094,0008150,0032268,0044267,0017076,0009987,0042578,0009893,0043167,0097367,0006807,0043412,0033674,0050877,0031325…
TRINITY_DN8190_c1_g1_i5	phosphodiesterase 6H, cGMP-specific, cone, gamma, -like	0	0	1.783	0	32.089	0	0	0	0	0	3.3872	712	1	0044237,0019001,0032555,0031401,0032553,0006796,0007165,0009967,0009966,1901363,1902533,0045860,0031399,0023014,0044238,0032561,0010646,0010647,0010562,0036094,0030553,0030551,0045937,0043410,0042325,0042327,0032270,0001932,0001934,0050953,0008081,1901564,0048522,0043549,0032501,0060255,0008150,0032268,0050877,0017076,0009987,0042578,0009893,0043167,0043168,0006807,0043412,0033674,0044267,0031325…
TRINITY_DN8190_c1_g1_i4	Retinal cGMP phosphodiesterase, gamma subunit family member	0	0	0	0	12.615	0	0	0	0	0	1.2615	801	1	0044237,0019001,0032555,0031401,0032553,0006796,0007165,0009967,0009966,1901363,1902533,0045860,0031399,0023014,0044238,0032561,0010646,0010647,0010562,0036094,0030553,0030551,0045937,0043410,0042325,0042327,0032270,0001932,0001934,0050953,0008081,1901564,0048522,0043549,0032501,0060255,0008150,0032268,0050877,0017076,0009987,0042578,0009893,0043167,0043168,0006807,0043412,0033674,0044267,0031325…
TRINITY_DN2226_c0_g1_i1	NADH dehydrogenase ubiquinone 1 beta subcomplex subunit 8, mitochondrial	145.974	119.607	318.891	185.054	360.205	1111.2	559.488	118.408	76.42	69.5	306.475	690	1	0030964,0050136,0032991,1990204,0008137,0016651,0098803,0098800,0003674,0003824,0016655,0045271,1902494,0016491,0005575,0005747,0003954,0098796
TRINITY_DN10662_c0_g2_i2	death-associated protein-like	620.504	93.123	798.253	177.141	213.955	253.523	102.467	169.295	536.362	107.909	307.253	620	1	0009895,0009894,0031667,0009892,0031669,0031668,0097190,0019222,0042594,0044248,0006914,0031329,0031324,0031323,1990928,0007165,0048523,0034198,0050794,0044237,0008150,0031330,0009991,0009056,0009267,0010506,0007154,0010507,0009987
TRINITY_DN10662_c0_g2_i4	death-associated protein-like	28.558	6.378	47.244	20.034	11.186	9.788	8.235	11.813	40.166	5.891	18.9293	1402	2	0009895,0009894,0031667,0009892,0031669,0031668,0097190,0019222,0042594,0044248,0006914,0031329,0031324,0031323,1990928,0007165,0048523,0034198,0050794,0044237,0008150,0031330,0009991,0009056,0009267,0010506,0007154,0010507,0009987
TRINITY_DN10662_c0_g2_i7	death-associated protein-like	12.973	2.557	24.828	6.356	6	6.173	1.298	5.081	12.989	3.987	8.2242	602	2	0009895,0009894,0031667,0009892,0031669,0031668,0097190,0019222,0042594,0044248,0006914,0031329,0031324,0031323,1990928,0007165,0048523,0034198,0050794,0044237,0008150,0031330,0009991,0009056,0009267,0010506,0007154,0010507,0009987
TRINITY_DN1259_c70_g1_i1	NADH dehydrogenase ubiquinone 1 subunit C1, mitochondrial	131.053	128.534	233.531	133.935	248.866	1033.55	770.304	111.404	70.09	110.841	297.211	430	1	0030964,0005747,0032991,1990204,0098796,0098803,0098800,0045271,1902494,0005575
TRINITY_DN4325_c0_g1_i13	ATP synthase-coupling factor 6, mitochondrial	118.957	132.507	184.713	181.884	279.953	1141.1	671.313	141.101	95.155	53.782	300.047	707	1	0015075,0051234,0015077,1901293,0098660,1901137,0009201,0015078,0046390,0009144,0006812,0003674,0072521,0009152,0009150,0015985,0046034,0098662,0006807,0009117,0044249,0034654,0055085,0046483,0055086,0009987,0009199,0008150,0006139,0072522,0006796,0019693,0022890,0005575,0017144,0006754,0018130,1901566,1901576,1901135,1901362,1901360,0019438,0022857,0051179,0098800,0090407,0034220,0000276,0009205…
TRINITY_DN11338_c0_g1_i2	complement C1q subcomponent subunit C-like	1.737	127.401	77.281	313.545	36.291	499.124	46.868	136.717	1907.58	84.533	323.108	1219	1
TRINITY_DN11338_c0_g1_i9	C1q domain-containing protein	0	2.165	0	101.489	3.418	4.963	0	2.182	3.906	0.583	11.8706	1060	1
TRINITY_DN682_c0_g1_i6	high mobility group protein B2-like	577.424	144.971	153.552	206.299	337.358	152.163	153.234	210.561	253.432	139.392	232.839	788	1
TRINITY_DN682_c0_g1_i7	high mobility group-T protein-like	82.601	24.998	230.736	56.786	115.638	89.551	77.881	90.233	69.834	47.716	88.5974	2326	1
TRINITY_DN1520_c1_g3_i1	115 kDa protein in type-1 retrotransposable element R1DM-like	10.251	785.192	187.423	561.691	86.888	166.717	155.396	419.73	626.157	136.436	313.588	1284	0
TRINITY_DN4275_c0_g1_i7	Liver-expressed antimicrobial peptide 2	0	380.635	0.095	0	0.371	0	1.937	0.436	0	1373.21	175.668	1744	1	0044419,0098542,0006952,0009617,0043207,0042742,0008150,0051707
TRINITY_DN4275_c0_g1_i3	TRINITY_DN4275_c0_g1_i3	0	180.207	0	0.159	0	0	3.462	0.327	0.15	569.709	75.4014	1675	0
TRINITY_DN4275_c0_g1_i4	Liver-expressed antimicrobial peptide 2	0	10.284	0	0	0.088	0	0.094	0	0	118.661	12.9127	2281	1	0044419,0098542,0006952,0009617,0043207,0042742,0008150,0051707
TRINITY_DN177_c0_g1_i8	complement C1r subcomponent	0	0	0	0	0	0	0	0.107	0	1812.84	181.294	2256	1	0016787,0070011,0017171,0140096,0003674,0003824,0004175,0008233,0008236,0016825,0004252,0005575,0110165,0005615
TRINITY_DN177_c0_g1_i3	complement C1r subcomponent-like	0	0	0.067	0	0.085	0	0	0	0.375	606.406	60.6933	946	2	0016787,0070011,0017171,0140096,0003674,0003824,0004175,0008233,0008236,0016825,0004252,0005575,0110165,0005615
TRINITY_DN177_c0_g1_i12	complement C1r subcomponent	0	0	0	0.017	0	0	0	0	0	70.813	7.083	3529	2	0016787,0070011,0017171,0140096,0003674,0003824,0004175,0008233,0008236,0016825,0004252,0005575,0110165,0005615
TRINITY_DN177_c0_g1_i22	Putative complement C1r-A subcomponent-like	0	0	0	0	0	0	0	0	0	33.747	3.3747	2419	2	0002684,0002682,0006956,0043169,0043167,0004252,0006959,0006958,0140096,0006955,0110165,0004175,0016825,0005575,0005615,0016787,0070011,0002376,0002252,0002253,0003824,0008233,0050778,0008236,0031224,0050776,0016021,0008150,0005509,0003674,0017171,0046872
TRINITY_DN177_c0_g1_i2	complement C1r subcomponent	0	0	0	0	0	0	0	0	0	31.005	3.1005	2521	1	0016787,0070011,0017171,0140096,0003674,0003824,0004175,0008233,0008236,0016825,0004252,0005575,0110165,0005615
TRINITY_DN177_c0_g1_i5	Complement component 1, r subcomponent	0	0	0	0	0	0	0	0	0	18.245	1.8245	1632	4	0002684,0002682,0006956,0043169,0043167,0004252,0006959,0006958,0140096,0006955,0110165,0004175,0016825,0005575,0005615,0016787,0070011,0002376,0002252,0002253,0003824,0008233,0050778,0008236,0031224,0050776,0016021,0008150,0005509,0003674,0017171,0046872
TRINITY_DN944_c2_g1_i3	Mucin-like	3418.11	0.249	5.612	0.267	3.584	0.746	0.772	14.825	0	0	344.416	438	1
TRINITY_DN5092_c0_g1_i1	cytochrome c oxidase subunit	172.861	155.826	370.598	186.328	395.856	330.718	891.996	227.039	98.052	118.282	294.756	885	1	0043226,0110165,0043229,0005575,0005739,0043231,0043227
TRINITY_DN14161_c0_g1_i1	NADH dehydrogenase ubiquinone 1 alpha subcomplex subunit 12	131.941	134.98	278.165	147.123	403.039	846.718	702.276	105.571	109.635	97.897	295.735	581	1	0050136,0008137,0016651,0003674,0009055,0110165,0003824,0016655,0016491,0005575,0016020,0003954
TRINITY_DN4039_c0_g1_i17	BBS1 domain-containing protein	1.304	1.859	8.292	5.353	15.552	17.644	11.756	2.232	4.607	1412.82	148.142	3452	2	0008104,0051641,0033365,0030990,0099081,0099080,0009987,0110165,0034613,0005575,0099513,0099512,0043232,0005930,0005874,0005813,0051179,0005815,0005814,0036064,0033036,0008150,0032991,0070727,0043228,0043229,0043226,0061512
TRINITY_DN4039_c0_g1_i32	BBS1 domain-containing protein	0.449	0.721	1.769	2.183	5.913	6.433	9.524	1.371	2.535	913.999	94.4897	3410	2	0008104,0051641,0033365,0030990,0099081,0099080,0009987,0110165,0034613,0005575,0099513,0099512,0043232,0005930,0005874,0005813,0051179,0005815,0005814,0036064,0033036,0008150,0032991,0070727,0043228,0043229,0043226,0061512
TRINITY_DN4039_c0_g1_i9	BBS1 domain-containing protein	0.347	0.132	1.15	0.356	6.657	0.756	0.243	0.221	0.181	77.287	8.733	3507	2	0008104,0051641,0033365,0030990,0099081,0099080,0009987,0110165,0034613,0005575,0099513,0099512,0043232,0005930,0005874,0005813,0051179,0005815,0005814,0036064,0033036,0008150,0032991,0070727,0043228,0043229,0043226,0061512
TRINITY_DN4039_c0_g1_i53	BBS1 domain-containing protein	1.994	6.575	3.401	3.279	10.488	3.774	1.706	3.597	2.971	25.596	6.3381	3752	3	0008104,0051641,0033365,0030990,0099081,0099080,0061512,0110165,0034613,0005575,0099513,0099512,0043232,0005930,0005874,0005813,0051179,0005815,0005814,0036064,0031224,0033036,0016021,0008150,0032991,0070727,0043228,0043229,0043226,0009987
TRINITY_DN312_c1_g1_i1	Myozenin 1	0.023	0	0.054	0	0.487	0	2513.38	2.913	0.245	0	251.71	2009	1	0005856,0015629,0003674,0110165,0043228,0043229,0008092,0005575,0003779,0030018,0043226,0043232,0005515
TRINITY_DN14073_c0_g1_i1	beta-crystallin S-1-like	0	0	0	0	3063.69	0	0	0	0	0	306.369	864	1	0002088,0048856,0008150,0032502
TRINITY_DN14073_c0_g1_i3	beta-crystallin S-1-like	0	0	0	0	167.978	0	0	0	0	0	16.7978	852	1	0002088,0048856,0008150,0032502
TRINITY_DN14073_c0_g1_i5	beta-crystallin S-1-like	0	0	0	0	12.187	0	0	0	0	0	1.2187	927	1	0002088,0048856,0008150,0032502
TRINITY_DN4290_c1_g1_i4	voltage-dependent anion-selective channel protein 2	188.449	97.074	113.349	93.164	101.378	408.224	890.728	154.548	44.192	29.856	212.096	1903	1	0015075,0098588,0110165,0015267,0031090,0022832,0005575,0005244,0022836,0015103,0031968,0022857,0031966,0016020,0008509,0005741,0005216,0008308,0003674,0022803,0005253,0019867
TRINITY_DN4290_c1_g1_i2	voltage-dependent anion-selective channel protein 2	58.93	27.13	41.394	32.673	31.613	158.357	291.535	49.449	11.337	10.312	71.273	2008	1	0015075,0098588,0110165,0015267,0031090,0022832,0005575,0005244,0022836,0015103,0031968,0022857,0031966,0016020,0008509,0005741,0005216,0008308,0003674,0022803,0005253,0019867
TRINITY_DN7783_c0_g1_i4	S100 calcium-binding protein U -like	9.636	78.663	85.824	167.541	144.136	100.486	358.202	1677.55	470.157	13.951	310.615	735	1	0043169,0046872,0005509,0003674,0043167
TRINITY_DN1576_c12_g1_i4	FABP domain-containing protein	0.273	1013.56	710.378	0	1303.88	4.764	2.847	5.136	0.268	0.226	304.133	2056	1
TRINITY_DN1576_c12_g1_i1	TRINITY_DN1576_c12_g1_i1	0	22.907	2.804	0.695	1.432	1.607	0	0.656	0	0	3.0101	383	0
TRINITY_DN1576_c12_g1_i6	FABP domain-containing protein	0.101	19.641	2.241	0.174	1.543	0.4	0	0.09	0	0	2.419	2214	2	0008289,0003674
TRINITY_DN9_c0_g1_i1	phosphoglycerate mutase 2	1.133	0	2.144	0	0.785	1164.93	1484.09	6.997	0	0	266.009	692	1
TRINITY_DN3493_c1_g1_i11	hypothetical protein	1.057	0	9.893	0	2123.09	0	0	0	0	0	213.404	1553	2	0005575,0031224,0016021,0110165
TRINITY_DN3493_c1_g1_i24	hypothetical protein	0.04	0	0.112	0	393.137	0	0	0	0	0.28	39.3569	2197	3	0005575,0031224,0016021,0110165
TRINITY_DN3493_c1_g1_i16	hypothetical protein	0	0.122	2.156	0	223.379	0	0	0	0	0	22.5657	1146	2
TRINITY_DN3493_c1_g1_i23	hypothetical protein	0	0	0.103	0.022	116.018	0	0	0	0	0	11.6143	2810	3
TRINITY_DN3493_c1_g1_i15	hypothetical protein	0	0	0.411	0	91.496	0	0	0	0	0	9.1907	1706	2	0005575,0031224,0016021,0110165
TRINITY_DN3493_c1_g1_i10	hypothetical protein	0	0	0.049	0	50.759	0	0	0	0	0	5.0808	1642	2	0005575,0031224,0016021,0110165
TRINITY_DN3493_c1_g1_i1	hypothetical protein	0	0	0	0	39.665	0	0	0	0	0	3.9665	1462	2	0005575,0031224,0016021,0110165
TRINITY_DN3493_c1_g1_i21	hypothetical protein	0	0	0.177	0	38.284	0	0	0	0	0	3.8461	2532	3
TRINITY_DN3493_c1_g1_i25	hypothetical protein	0	0	0	0	34.307	0	0	0	0	0	3.4307	1624	2	0005575,0031224,0016021,0110165
TRINITY_DN3493_c1_g1_i3	hypothetical protein	0	0	0	0	25.638	0	0	0	0	0	2.5638	1868	2	0005575,0031224,0016021,0110165
TRINITY_DN3493_c1_g1_i8	hypothetical protein	0	0	0	0	21.174	0	0	0	0	0	2.1174	4089	4	0005575,0031224,0016021,0110165
TRINITY_DN3493_c1_g1_i20	hypothetical protein	0	0	0	0	18.047	0.032	0	0	0	0	1.8079	2023	1	0005575,0031224,0016021,0110165
TRINITY_DN4516_c0_g1_i3	gamma-crystallin N-B	0	1.383	3.104	11.549	3119.29	6.118	3.817	1.644	11.897	8.108	316.691	952	1	0002088,0048856,0008150,0032502
TRINITY_DN29369_c0_g1_i2	elongation factor 1-alpha 1	0	0	138.436	1.571	124.106	450.462	1833.05	37.804	4.955	1.809	259.22	270	1	0016818,0032550,0016817,0097159,0044260,0043167,0043168,0019001,0097367,0001883,0000166,0044249,0003746,0032555,0009987,0003723,0001882,1901265,0016462,0016787,1901576,1901363,0090079,0003824,0003924,0044237,0032553,0008150,0043170,0071704,0009059,0009058,0017111,0005525,0032549,0034645,0032561,0008135,0045182,0003674,0003676,0035639,0017076,0036094,0006414
TRINITY_DN5708_c0_g1_i1	5-aminolevulinate synthase	202.134	129.497	43.003	79.235	68.307	1784.49	308.591	74.707	116.802	68.149	287.491	2234	1	0048869,0050662,0051188,0043167,0051186,0043233,0031974,0097159,0030099,0019438,0043168,0006807,0003870,0008144,1901362,0044249,0030851,0016740,0016747,0048037,0046483,0005759,0009987,0016748,0030223,0006779,0016410,0005575,1901564,0002573,1901566,0070013,1901576,0033014,1901363,0033013,1901360,0006778,0003824,0032502,0030154,0034641,0044237,0110165,0008150,0016746,0071704,0009058,0006725,0019842…
TRINITY_DN16876_c0_g1_i2	hypothetical protein	3263.74	0	2.308	0.077	7.4	0	0.112	39.52	0	0.183	331.334	974	1
TRINITY_DN196_c2_g1_i1	OS01G0584100 protein	60.712	323.571	58.317	494.255	175.093	63.552	414.983	944.252	317.028	103.334	295.51	268	0
TRINITY_DN9176_c0_g2_i3	cytochrome c oxidase subunit 5B, mitochondrial-like	360.545	132.893	765.515	213.738	499.017	422.712	121.751	227.063	161.37	160.704	306.531	839	1	0015075,0015077,0015078,0031975,0009060,0045333,0015980,0009987,0006091,0016491,0110165,0015002,0005575,0055114,0022857,0031967,0003824,0019646,0044237,0022890,0008150,0016676,0005740,0006123,0016675,0008324,0003674,0009055,0004129,0022900,0022904
TRINITY_DN8856_c1_g2_i2	granulin-like	113.83	232.484	143.897	176.194	92.511	226.707	249.796	276.155	381.169	539.828	243.257	3827	4	0048869,0043043,0051239,0043604,0030099,0043603,0006807,0051960,0044391,0007399,0044249,0044271,1990904,0022625,0044267,0009987,0044260,0048731,0005575,1901564,1901566,1901576,0048856,0050793,0030154,0009058,0044237,0044238,0008150,0043170,0032991,0071704,0030218,0009059,0034641,0015934,0032502,0003735,0034645,0003674,0006518,0005198,0019538,0006412,2000026
TRINITY_DN8856_c1_g2_i44	granulin-like	0.153	99.517	2.133	19.194	1.601	3.836	3.057	32.397	23.943	2.052	18.7883	486	1	0050793,0048856,0051239,0048731,0032502,0051960,2000026,0008150,0007399
TRINITY_DN8856_c1_g2_i13	granulin-like	0.054	70.223	1.593	16.811	1.371	2.287	2.296	11.618	18.742	0.181	12.5176	2516	2	0050793,0048856,0051239,0048731,0032502,0051960,2000026,0008150,0007399
TRINITY_DN8856_c1_g2_i22	granulin-like	0	25.914	0.613	3.853	0.259	0.663	0.449	8.069	4.618	0.368	4.4806	1723	1	0050793,0048856,0051239,0048731,0032502,0051960,2000026,0008150,0007399
TRINITY_DN8856_c1_g2_i58	Granulin A	0	23.08	0.146	3.619	0	1.344	0.578	6.885	3.188	0	3.884	575	1	0050793,0048856,0051239,0048731,0032502,0051960,2000026,0008150,0007399
TRINITY_DN8856_c1_g2_i35	Putative RUN domain-containing protein 1	0	22.276	0	4.719	3.221	3.006	0	3.027	0	0	3.6249	237	1	0050793,0048856,0051239,0048731,0032502,0051960,2000026,0008150,0007399
TRINITY_DN867_c0_g1_i20	Putative cytochrome P450 2K4-like	0	131.348	0	1059.73	0	0.225	0	0	0	10.487	120.179	463	1	0004497,0097159,0043167,0043169,0008395,0005737,0044281,0048037,0009987,0016491,0110165,0005575,0016705,0043231,0046906,1901363,0055114,0020037,0003824,0044237,0008150,0071704,0005506,0003674,0006082,0043229,0046872,0043226,0043227,0046914
TRINITY_DN867_c0_g1_i18	Putative cytochrome P450 2K4-like	0	183.335	0.249	771.006	0	0	0	0	0	72.422	102.701	1469	2	0004497,0097159,0043167,0043169,0008395,0005737,0044281,0048037,0009987,0016491,0110165,0005575,0016705,0043231,0046906,1901363,0055114,0020037,0003824,0044237,0008150,0071704,0005506,0003674,0006082,0043229,0046872,0043226,0043227,0046914
TRINITY_DN867_c0_g1_i19	Putative cytochrome P450 2K4-like	0	68.059	0	303.018	0	0	0	0	0	23.054	39.4131	786	1	0004497,0097159,0043167,0043169,0008395,0005737,0044281,0048037,0009987,0016491,0110165,0005575,0016705,0043231,0046906,1901363,0055114,0020037,0003824,0044237,0008150,0071704,0005506,0003674,0006082,0043229,0046872,0043226,0043227,0046914
TRINITY_DN867_c0_g1_i12	cytochrome P450 2K1-like	0	21.904	0	82.554	0	0	0	0	0	13.083	11.7541	1123	1	0071704,0005737,0004497,0044281,0055114,0043231,0009987,0003674,0016491,0110165,0003824,0043229,0044237,0005575,0008395,0006082,0043226,0008150,0043227
TRINITY_DN867_c0_g1_i11	cytochrome P450 2K1-like	0	5.612	0.026	59.092	0	0	0	0	0	7.653	7.2383	2273	1	0071704,0005737,0004497,0044281,0055114,0043231,0009987,0003674,0016491,0110165,0003824,0043229,0044237,0005575,0008395,0006082,0043226,0008150,0043227
TRINITY_DN867_c0_g1_i7	cytochrome P450 2K1-like	0.126	0	0	0	0.032	0	0	0	0.055	64.325	6.4538	2196	1	0071704,0005737,0004497,0044281,0055114,0043231,0009987,0003674,0016491,0110165,0003824,0043229,0044237,0005575,0008395,0006082,0043226,0008150,0043227
TRINITY_DN867_c0_g1_i3	cytochrome P450 2K1-like	0	3.724	0.483	29.752	0	0	0	0	0	1.337	3.5296	1543	2	0071704,0005737,0004497,0044281,0055114,0043231,0009987,0003674,0016491,0110165,0003824,0043229,0044237,0005575,0008395,0006082,0043226,0008150,0043227
TRINITY_DN867_c0_g1_i15	Putative cytochrome P450 2K4-like	0	8.935	0.166	19.501	0	0	0	0	0	1.998	3.06	1760	2	0004497,0097159,0043167,0043169,0008395,0005737,0044281,0048037,0009987,0016491,0110165,0005575,0016705,0043231,0046906,1901363,0055114,0020037,0003824,0044237,0008150,0071704,0005506,0003674,0006082,0043229,0046872,0043226,0043227,0046914
TRINITY_DN5365_c0_g1_i29	Proteasome subunit beta	247.529	115.185	91.398	113.546	114.108	299.337	413.76	128.157	97.777	89.567	171.036	829	1	0070003,0003674,0043161,0010498,0051603,0006807,0110165,0005737,0044265,0030163,0140096,0044260,0006508,0004175,0004298,0005575,0005634,0005839,1901564,0016787,0070011,0044248,0003824,0008233,0044237,0044238,0008150,0043170,0071704,0043231,1901575,0032991,1901565,0043632,0009057,0009056,0043227,0043229,0019941,0019538,0006511,0043226,0009987
TRINITY_DN5365_c0_g1_i23	Proteasome subunit beta 6	163.929	48.21	47.015	34.787	54.016	98.106	277.733	65.509	36.796	41.396	86.7497	875	1	0070003,0031224,1901565,0003674,0043161,0010498,0051603,0006807,0044260,0005737,0044265,0030163,0140096,0110165,0006508,0004175,0004298,0005575,0005634,0005839,1901564,0016787,0070011,0044248,0003824,0008233,0044237,0044238,0016021,0008150,0043170,0071704,0043632,1901575,0032991,0043231,0009057,0009056,0043227,0043229,0019941,0019538,0006511,0043226,0009987
TRINITY_DN5365_c0_g1_i10	Proteasome subunit beta	10.643	24.977	23.951	18.706	29.931	60.5	30.045	27.143	26.199	17.571	26.9666	928	2	0070003,0003674,0043161,0010498,0051603,0006807,0044260,0005737,0044265,0030163,0140096,0110165,0006508,0004175,0043229,0004298,0005575,0005634,0005839,1901564,0016787,0070011,0044248,0003824,0008233,0044237,0044238,0008150,0043170,0071704,0043231,1901575,0032991,1901565,0009057,0009056,0043227,0043632,0019941,0019538,0006511,0043226,0009987
TRINITY_DN2179_c0_g2_i2	dehydrogenase/reductase SDR family member 9	109.48	540.747	21.516	265.923	18.952	130.312	73.616	108.711	45.466	1334.6	264.932	1124	1
TRINITY_DN722_c0_g1_i14	protein NDRG1	1.792	541.237	73.867	615.475	744.968	15.777	65.4	335.718	45.724	45.25	248.521	2076	1	0005737,0009987,0110165,0050794,0005575,0007165,0008150
TRINITY_DN722_c0_g1_i22	N-myc downstream regulated 1a	0.195	79.306	5.597	48.642	78.797	1.953	4.054	37.192	4.008	7.987	26.7731	2886	4	0005737,0009987,0110165,0050794,0005575,0007165,0008150
TRINITY_DN722_c0_g1_i51	protein NDRG1	0.071	62.224	5.021	31.491	54.378	3.186	2.938	29.49	2.149	6.576	19.7524	3717	3	0005737,0009987,0110165,0050794,0005575,0007165,0008150
TRINITY_DN722_c0_g1_i15	protein NDRG1	0	13.608	0	0	0.248	0	0	0.209	0	0	1.4065	3832	3	0005737,0009987,0110165,0050794,0005575,0007165,0008150
TRINITY_DN1122_c23_g1_i1	TRINITY_DN1122_c23_g1_i1	118.792	334.736	311.226	419.121	276.038	447.725	342.515	294.184	308.047	78.445	293.083	1250	0
TRINITY_DN938_c0_g2_i4	ATP synthase, H+ transporting, mitochondrial F0 complex, subunit g	76.17	76.448	228.203	126.929	224.824	1012.31	320.935	90.239	74.218	60.694	229.097	1571	1	0015252,0044237,0044238,0046034,0009117,0016887,0009987,0009199,0019693,0018130,1901362,1901360,0034220,0009205,0009201,0022890,0033177,0017111,0032991,0006163,0009165,0006164,1901564,0015399,0022804,0009259,0015075,0015077,0098662,0098660,0015078,0090407,0019637,0019438,0015985,0015986,0022803,0016740,0044281,0072521,0015267,0072522,0005261,0005575,0006753,0006754,1901566,0098800,0009260,0008150…
TRINITY_DN938_c0_g2_i1	ATP synthase, H+ transporting, mitochondrial F0 complex, subunit g	62.901	19.342	143.926	0	126.044	18.025	128.691	20.273	17.702	39.402	57.6306	553	1	0015252,0044237,0044238,0046034,0009117,0016887,0009987,0009199,0019693,0018130,1901362,1901360,0034220,0009205,0009201,0022890,0033177,0017111,0032991,0006163,0009165,0006164,1901564,0015399,0022804,0009259,0015075,0015077,0098662,0098660,0015078,0090407,0019637,0019438,0015985,0015986,0022803,0016740,0044281,0072521,0015267,0072522,0005261,0005575,0006753,0006754,1901566,0098800,0009260,0008150…
TRINITY_DN5095_c0_g1_i1	hypothetical protein	0	0.12	0.223	0.133	0.082	0.033	0	0	0.031	1871.5	187.212	1958	1
TRINITY_DN5095_c0_g1_i2	TRINITY_DN5095_c0_g1_i2	0	0.311	0	0	0.966	0	0	0	0	374.441	37.5718	452	0
TRINITY_DN5095_c0_g1_i4	hypothetical protein	0.25	0	0	0.029	0	0	0	0	0	168.651	16.893	2203	3
TRINITY_DN5095_c0_g1_i3	TRINITY_DN5095_c0_g1_i3	0	0	0.175	0	0	0	0	0	0	14.384	1.4559	493	0
TRINITY_DN25318_c0_g1_i17	kininogen-1-like	0	1.375	0.034	0	0.217	0.121	0.059	0.455	0.229	2015.58	201.806	1654	1	0002020,0009892,0003674,0030414,0070011,0061134,0004866,0019222,0051336,0006807,0044260,0019899,0080090,0044267,0009987,0045861,0030162,0005515,0006508,0004175,0031323,0140096,0048523,0016787,0098772,0051248,0051171,0051246,0051172,0044092,0004857,0051346,0003824,0050790,0008233,0010605,0050794,0044237,0044238,0010951,0052548,0008150,0043170,0071704,0019538,0030234,0032268,0061135,1901564,0010466…
TRINITY_DN25318_c0_g1_i18	kininogen-1-like	0	0.067	0	0	0	0	0	0	0	294.468	29.4535	2011	2	0002020,0009892,0003674,0030414,0070011,0061134,0004866,0019222,0051336,0006807,0044260,0019899,0080090,0044267,0009987,0045861,0030162,0005515,0006508,0004175,0031323,0140096,0048523,0016787,0098772,0051248,0051171,0051246,0051172,0044092,0004857,0051346,0003824,0050790,0008233,0010605,0050794,0044237,0044238,0010951,0052548,0008150,0043170,0071704,0019538,0030234,0032268,0061135,1901564,0010466…
TRINITY_DN25318_c0_g1_i10	kininogen-1-like	0	0	0	0.149	0	0	0	0	0	75.161	7.531	1776	1	0002020,0009892,0003674,0030414,0070011,0061134,0004866,0019222,0051336,0006807,0044260,0019899,0080090,0044267,0009987,0045861,0030162,0005515,0006508,0004175,0031323,0140096,0048523,0016787,0098772,0051248,0051171,0051246,0051172,0044092,0004857,0051346,0003824,0050790,0008233,0010605,0050794,0044237,0044238,0010951,0052548,0008150,0043170,0071704,0019538,0030234,0032268,0061135,1901564,0010466…
TRINITY_DN25318_c0_g1_i5	kininogen-1	0	0	0	0	0	0	0	0	0	25.36	2.536	2658	3	0002020,0009892,0003674,0030414,0070011,0061134,0004866,0019222,0051336,0006807,0044260,0019899,0080090,0044267,0009987,0045861,0030162,0005515,0006508,0004175,0031323,0140096,0048523,0016787,0098772,0051248,0051171,0051246,0051172,0044092,0004857,0051346,0003824,0050790,0008233,0010605,0050794,0044237,0044238,0010951,0052548,0008150,0043170,0071704,0019538,0030234,0032268,0061135,1901564,0010466…
TRINITY_DN25318_c0_g1_i3	kininogen-1-like	0	0	0	0	0	0	0	0	0	12.257	1.2257	1705	2	0002020,0009892,0003674,0030414,0070011,0061134,0004866,0019222,0051336,0006807,0044260,0019899,0080090,0044267,0009987,0045861,0030162,0005515,0006508,0004175,0031323,0140096,0048523,0016787,0098772,0051248,0051171,0051246,0051172,0044092,0004857,0051346,0003824,0050790,0008233,0010605,0050794,0044237,0044238,0010951,0052548,0008150,0043170,0071704,0019538,0030234,0032268,0061135,1901564,0010466…
TRINITY_DN12987_c0_g1_i1	Crystallin, gamma M1 -like	0	0	0	0	3088.16	0	0	0	0	0	308.816	271	1	0002088,0048856,0008150,0032502
TRINITY_DN8698_c0_g4_i2	histone H3	1365.31	313.963	223.445	134.721	236.551	135.4	28.151	221.098	258.968	154.183	307.179	279	1	0043226,0110165,0043229,0005575,0005634,0043231,0043227
TRINITY_DN1661_c0_g1_i6	NADH ubiquinone oxidoreductase subunit A13	80.36	124.877	253.652	132.788	298.883	993.891	661.76	109.196	65.98	58.469	277.986	663	1	0030964,0005747,0032991,1990204,0098796,0098803,0098800,0045271,1902494,0005575
TRINITY_DN3586_c0_g1_i5	Translocon-associated protein subunit gamma	127.179	280.806	100.296	76.308	73.458	100.468	133.509	118.314	92.121	1499.16	260.162	955	1	0051234,0005783,0015031,0008104,0015833,0051641,0045047,0016020,0051649,0033365,0006612,0006886,0006614,0005773,0009987,0110165,0034613,0005575,0070972,0043231,0046907,0005886,0045184,0051179,0006613,0072657,0031224,0033036,0042886,0008150,0071705,0016021,0072599,0006605,0090150,0070727,0072594,0043229,0043226,0043227,0071702
TRINITY_DN4876_c0_g1_i3	ATP synthase E chain, mitochondrial	109.665	32.956	169.419	77.902	325.219	791.852	647.446	63.655	41.926	30.029	229.007	823	1	0015075,0051234,0015077,1901293,0098660,1901137,0009201,0015078,0046390,0009144,0006812,0003674,0072521,0009152,0009150,0015985,0046034,0098662,0006807,0009117,0044249,0034654,0055085,0046483,0055086,0009987,0009199,0008150,0006139,0072522,0006796,0019693,0022890,0005575,0017144,0006754,0018130,1901566,1901576,1901135,1901362,1901360,0019438,0022857,0051179,0098800,0090407,0034220,0000276,0009205…
TRINITY_DN4876_c0_g1_i9	ATP synthase E chain, mitochondrial	19.55	3.965	34.316	14.871	69.946	112.69	124.935	12.746	7.239	2.989	40.3247	1195	2	0015075,0051234,0015077,1901293,0098660,1901137,0009201,0015078,0046390,0009144,0006812,0003674,0072521,0009152,0009142,0009150,0015985,0046034,0098662,0006807,0009117,0044249,0034654,0045259,0005753,0055085,0046483,0055086,0009987,0009199,0008150,0006139,0072522,0006796,0019693,0022890,0005575,0017144,0006754,0018130,1901566,1901576,1901135,1901362,1901360,0019438,0022857,0051179,0098800,0090407…
TRINITY_DN4876_c0_g1_i10	ATP synthase E chain, mitochondrial	3.904	3.074	6.472	4.098	13.31	18.818	10.914	2.647	2.271	2.929	6.8437	1477	1	0015075,0051234,0015077,1901293,0009144,0098660,1901137,0044237,0015078,0046390,0003674,0006812,0008150,0072521,0009152,0009150,0015985,0046034,0098662,0006807,0009117,0044249,0034654,0016021,0055085,0046483,0055086,0009987,0009199,0110165,0006139,0072522,0006796,0019693,0022890,0005575,0017144,0006754,0018130,1901566,0071704,1901135,1901362,1901360,0019438,0022857,0051179,0098800,0090407,0034220…
TRINITY_DN1668_c0_g1_i2	Ig-like	0.202	6.182	10.471	132.694	5.127	36.435	1.066	9.829	949.176	1.275	115.246	1177	1	0009897,0051707,0002684,0002682,0002768,0002429,0060090,0097478,0045087,0002764,0044419,0098542,0050851,0006952,0050853,0006955,0110165,0005575,0007165,0007166,0002757,0002376,0002253,0009617,0050778,0050794,0050776,0042742,0008150,0098552,0003674,0043207,0009987,0005623
TRINITY_DN1668_c0_g1_i13	Ig-like	0	22.252	6.431	327.21	4.375	48.643	7.819	14.606	581.503	3.083	101.592	643	1	0009897,0051707,0002684,0002682,0002768,0002429,0060090,0097478,0045087,0002764,0044419,0098542,0050851,0006952,0050853,0006955,0110165,0005575,0007165,0007166,0002757,0002376,0002253,0009617,0050778,0050794,0050776,0042742,0008150,0098552,0003674,0043207,0009987,0005623
TRINITY_DN1668_c0_g1_i9	Ig-like	0	9.213	0.515	299.735	0	15.035	0	22.839	138.449	0	48.5786	643	1	0009897,0051707,0002684,0002682,0002768,0002429,0060090,0097478,0045087,0002764,0044419,0098542,0050851,0006952,0050853,0006955,0110165,0005575,0007165,0007166,0002757,0002376,0002253,0009617,0050778,0050794,0050776,0042742,0008150,0098552,0003674,0043207,0009987,0005623
TRINITY_DN1668_c0_g1_i10	Ig-like	0.031	3.853	3.553	45.857	1.389	11.799	0.09	3.76	212.148	0.511	28.2991	1626	2	0009897,0051707,0002684,0002682,0002768,0002429,0060090,0097478,0045087,0002764,0044419,0098542,0050851,0006952,0050853,0006955,0110165,0005575,0005615,0007166,0002757,0002376,0002253,0009617,0050778,0050794,0050776,0042742,0008150,0098552,0007165,0003674,0043207,0009987,0005623
TRINITY_DN1668_c0_g1_i4	Ig-like	0.076	0.174	3.047	17.605	2.111	4.271	0.312	1.059	73.238	0.117	10.201	1986	3	0009897,0051707,0002684,0002682,0002768,0002429,0060090,0097478,0045087,0002764,0044419,0098542,0050851,0006952,0050853,0006955,0110165,0005575,0005615,0007166,0002757,0002376,0002253,0009617,0050778,0050794,0050776,0042742,0008150,0098552,0007165,0003674,0043207,0009987,0005623
TRINITY_DN1668_c0_g1_i15	immunoglobulin light chain	0	3.648	0.794	43.881	0.506	1.36	0.714	1.397	42.61	0	9.491	326	1	0002376,0006955,0110165,0005575,0005615,0008150
TRINITY_DN1668_c0_g1_i6	Ig-like	0	0.351	0.444	3.23	0.057	0.461	0	0.342	35.413	0	4.0298	2055	3	0009897,0051707,0002684,0002682,0002768,0002429,0060090,0097478,0045087,0002764,0044419,0098542,0050851,0006952,0050853,0006955,0110165,0005575,0005615,0007166,0002757,0002376,0002253,0009617,0050778,0050794,0050776,0042742,0008150,0098552,0007165,0003674,0043207,0009987,0005623
TRINITY_DN4901_c0_g1_i1	TRINITY_DN4901_c0_g1_i1	180.201	318.272	417.522	160.985	380.23	202.648	588.269	126.569	117.345	299.354	279.139	615	0
TRINITY_DN3543_c0_g1_i3	vitellogenin-like	0	0	0	0	0	1.095	0	0	0.053	1605.75	160.69	1254	1	0033993,0005319,0003674,0009725,1901700,0032355,0010033,0008150,0014070
TRINITY_DN3543_c0_g1_i11	vitellogenin-like	0	0	0.03	0	0	0.271	0.116	0	0.049	572.87	57.3336	6999	3	0033993,0005319,0003674,0009725,1901700,0032355,0010033,0008150,0014070
TRINITY_DN3543_c0_g1_i7	vitellogenin-like	0	0	0	0	0.042	0	0	0.037	0	81.314	8.1393	1690	1	0033993,0005319,0003674,0009725,1901700,0032355,0010033,0008150,0014070
TRINITY_DN3543_c0_g1_i12	Os08g0543275 protein	0	0	0.076	0.032	0	0	0.08	0.061	0	69.082	6.9331	2010	1
TRINITY_DN3543_c0_g1_i25	proline-rich protein 11	0	0	0	0	0	0	0	0	0	20.531	2.0531	2540	0
TRINITY_DN3543_c0_g1_i13	vitellogenin-like	0	0	0	0	0	0	0	0	0	18.151	1.8151	4110	5	0033993,0005319,0003674,0009725,1901700,0032355,0010033,0008150,0014070
TRINITY_DN3543_c0_g1_i5	vitellogenin-like	0	0	0	0.029	0	0	0	0	0	16.975	1.7004	2188	2	0033993,0005319,0003674,0009725,1901700,0032355,0010033,0008150,0014070
TRINITY_DN3543_c0_g1_i19	vitellogenin-like	0	0	0	0	0	0	0	0	0	16.73	1.673	5824	3	0033993,0005319,0003674,0009725,1901700,0032355,0010033,0008150,0014070
TRINITY_DN2118_c0_g1_i2	Type I cytoskeletal 19-like	25.983	117.466	304.812	53.956	95.492	116.6	104.134	97.341	578.693	1073.78	256.826	433	1	0005882,0099081,0099080,0003674,0110165,0005198,0005575,0099513,0099512
TRINITY_DN2118_c0_g1_i6	Type I cytoskeletal 19-like	139.69	2.843	20.039	1.02	2.804	0.631	0.494	0.963	4.302	25.186	19.7972	387	1	0005882,0099081,0099080,0003674,0110165,0005198,0005575,0099513,0099512
TRINITY_DN1664_c0_g1_i10	ATP synthase subunit beta-1, mitochondrial -related	97.073	26.255	86.681	9.455	128.479	564.387	755.125	31.457	35.026	91.365	182.53	2590	2	0015075,0016818,0015252,0015078,0015077,0045259,0022803,0005753,0016887,0015267,0005261,0005575,0016787,0042626,0016817,0022857,0098800,0022853,0003824,0016740,0022890,0016462,0005216,0017111,0032991,0046933,0098796,0008324,0016469,0016776,0003674,0015399,0016772,0022804
TRINITY_DN1664_c0_g1_i3	ATP synthase subunit beta, mitochondrial	0	18.874	47.209	59.811	42.397	188.622	287.486	20.611	22.251	6.823	69.4084	1977	3	0015252,0009201,0022890,0045259,0046034,0009117,0005753,0032559,0016887,0032555,0009987,0009199,0110165,0019693,0018130,1901363,1901362,1901360,0009206,0033178,0009205,0044237,0044238,0016021,0017111,0032991,0006163,0009165,0006164,1901564,0022803,0022804,0009259,0015075,0015077,0098662,0009150,0098660,0015078,0090407,0030554,0019637,0043168,0019438,0015985,0015986,0015399,0016740,0044281,0072521…
TRINITY_DN1664_c0_g1_i11	ATP synthase subunit beta-1, mitochondrial -related	4.839	3.229	4.123	3.065	7.816	27.072	29.405	2.193	2.974	3.513	8.8229	2693	2	0015252,0009201,0022890,0045259,0046034,0009117,0005753,0032559,0016887,0032555,0009987,0009199,0110165,0019693,0018130,1901363,1901362,1901360,0009206,0033178,0009205,0044237,0044238,0016021,0017111,0032991,0006163,0009165,0006164,1901564,0022803,0022804,0009259,0015075,0015077,0098662,0009150,0098660,0015078,0090407,0030554,0019637,0097367,0019438,0015985,0015986,0015399,0016740,0044281,0072521…
TRINITY_DN1664_c0_g1_i34	ATP synthase subunit beta-1, mitochondrial -related	0	0	2.782	36.122	3.126	0	0.155	0	0	0	4.2185	3387	2	0015075,0016818,0015252,0015078,0015077,0045259,0022803,0005753,0016887,0015267,0005261,0005575,0016787,0042626,0016817,0022857,0098800,0022853,0003824,0016740,0022890,0016462,0005216,0017111,0032991,0046933,0098796,0008324,0016469,0016776,0003674,0015399,0016772,0022804
TRINITY_DN186_c0_g5_i1	TRINITY_DN186_c0_g5_i1	55.959	185.537	587.986	767.813	435.359	158.917	346.805	179.958	138.825	54.393	291.155	543	0
TRINITY_DN5034_c0_g1_i4	GABA A receptor associated protein	65.742	338.331	357.254	364.392	254.487	192.393	499.007	272.311	314.256	164.358	282.253	1427	1	0022411,0000422,0009056,0006996,0006807,0005515,0031625,0000045,0019899,0044248,0006914,0022607,0110165,0006508,0005575,1903008,1901564,0007033,0044389,0044237,0044238,0061726,0008150,0043170,0071704,0019538,1905037,0003674,0016043,0070925,0007005,0005829,0009987,0071840
TRINITY_DN7957_c0_g3_i1	TRINITY_DN7957_c0_g3_i1	416.759	183.31	348.276	302.526	528.678	390.853	270.558	257.114	198.82	26.732	292.363	228	0
TRINITY_DN1677_c6_g1_i7	NADH dehydrogenase ubiquinone iron-sulfur protein 3, mitochondrial	154.147	125.734	182.393	162.423	351.838	975.129	485.027	126.219	121.707	64.957	274.957	1017	1
TRINITY_DN1677_c6_g1_i16	protein disulfide-isomerase TMX3-like	0	0	0	0	27.745	0	0	0	0	0	2.7745	389	1
TRINITY_DN9346_c0_g1_i1	tubulin alpha-1B chain	1121.61	95.612	849.784	73.961	494.606	87.57	67.573	136.523	111.801	9.954	304.9	377	1	0140014,0003674,0097159,0043167,0006996,0019001,0043168,0001883,0000226,0000166,0005737,0099081,0032555,0009987,0032550,0001882,1901265,0005575,0097367,0099512,1901363,0005874,0032553,0110165,0008150,0005525,0032549,0032561,0099513,0007017,0007010,0016043,0035639,0048285,0099080,0017076,0036094,0000280,0071840
TRINITY_DN9279_c0_g1_i1	Complement component C3	0	0	0	0	0	0	0	0	0.519	2343.72	234.424	305	1	0030414,0002684,0002682,0004866,0006959,0006956,0006955,0110165,0005575,0005615,0098772,0002376,0004857,0002252,0002253,0061134,0061135,0050778,0050776,0008150,0030234,0003674
TRINITY_DN5697_c0_g2_i14	fructose-1,6-bisphosphatase 1A	0.972	410.808	0.088	929.775	0.227	0	0.077	0.217	0	1039.99	238.215	1316	1	0005575,0005829,0110165
TRINITY_DN5697_c0_g2_i11	fructose-1,6-bisphosphatase 1A	0	10.513	0	18.561	0	0	0	0	0	36.064	6.5138	1423	1	0005575,0005829,0110165
TRINITY_DN5697_c0_g2_i8	fructose-1,6-bisphosphatase 1A	0	12.084	0	16.732	0	0	0	0	0	36.028	6.4844	1422	2	0016787,0042578,0005829,0016791,0003674,0005975,0110165,0003824,0071704,0044238,0005575,0016788,0008150
TRINITY_DN5697_c0_g2_i2	fructose-1,6-bisphosphatase 1	0.022	8.504	0	19.103	0	0	0	0.063	0	34.153	6.1845	2493	3	0005575,0005829,0110165
TRINITY_DN7816_c0_g1_i8	eukaryotic translation initiation factor 3 subunit E	109.994	212.715	145.473	188.312	95.216	279.313	517.631	286.981	185.984	601.961	262.358	1662	1	0071704,1901576,0009059,0043227,0034645,0043226,0009987,0009058,0005634,0006413,0044260,0044249,0043229,0044237,0005575,0006414,0110165,0043231,0008150,0043170
TRINITY_DN713_c1_g1_i2	Crystallin, beta B1,-like	0	0	1.257	1.286	2467.21	0.222	0	0.052	1.311	0	247.134	1260	1	0002088,0048856,0008150,0032502
TRINITY_DN713_c1_g1_i1	Crystallin, beta B1,-like	1.268	0	2.684	0.05	493.083	0.74	0.144	0.046	0.14	0.118	49.8273	1393	1	0002088,0048856,0008150,0032502
TRINITY_DN3889_c0_g1_i5	ATP synthase F 0 complex subunit C3, mitochondrial	212.589	95.151	183.933	127.826	160.251	627.005	514.908	94.441	68.577	61.563	214.624	978	1	0015252,0044237,0044238,0046034,0009117,0016887,0009987,0009199,0019693,0018130,1901362,1901360,0034220,0009205,0009201,0022890,0033177,0017111,0032991,0006163,0009165,0006164,1901564,0015399,0022804,0009259,0015075,0015077,0098662,0098660,0015078,0090407,0019637,0019438,0015985,0015986,0022803,0016740,0044281,0072521,0015267,0072522,0005261,0005575,0006753,0006754,1901566,0009260,0008150,1901576…
TRINITY_DN3889_c0_g1_i3	ATP synthase F 0 complex subunit C3, mitochondrial	30.914	29.297	55.48	29.246	63.416	124.199	141.207	15.693	15.544	32.249	53.7245	1016	1	0015252,0044237,0044238,0046034,0009117,0016887,0009987,0009199,0019693,0018130,1901362,1901360,0034220,0009205,0009201,0022890,0033177,0017111,0032991,0006163,0009165,0006164,1901564,0015399,0022804,0009259,0015075,0015077,0098662,0098660,0015078,0090407,0019637,0019438,0015985,0015986,0022803,0016740,0044281,0072521,0015267,0072522,0005261,0005575,0006753,0006754,1901566,0009260,0008150,1901576…
TRINITY_DN1488_c0_g2_i2	stress-associated endoplasmic reticulum protein 1	133.176	318.159	273.308	130.744	108.632	110.748	99.139	257.44	152.28	1023.25	260.688	890	1	0051234,0005783,0015031,0044237,0005789,0030968,0044260,0008104,0015833,0043413,0043412,0016020,0042886,0044267,0005773,0009987,0070085,0006486,0031090,0005575,0007165,1901564,0006464,0045184,0051179,0050794,0031224,0044238,0110165,0033036,0016021,0008150,0043170,0071704,0071705,0005886,0071702,0043231,0036211,0043229,0034976,0019538,0043226,0043227,0006807
TRINITY_DN785_c0_g1_i54	Proteasome subunit alpha type	244.274	233.924	120.384	175.328	150.252	297.85	830.619	210.439	147.216	90.426	250.071	1007	1	0003674,0043161,0010498,0051603,0006807,0110165,0005737,0044265,0030163,0140096,0044260,0006508,0004175,0043229,0005575,0005634,0043231,1901564,0016787,0070011,0044248,0003824,0008233,0044237,0044238,0008150,0043170,0071704,0019773,1901575,0032991,1901565,0009057,0009056,0043227,0043632,0019941,0019538,0006511,0043226,0009987
TRINITY_DN785_c0_g1_i39	Proteasome subunit alpha type	12.655	8.932	7.205	13.219	10.834	14.02	9.304	13.59	29.008	5.937	12.4704	1698	1	0070003,0003674,0019773,0010498,0051603,0006807,0044260,0005737,0044265,0030163,0140096,0110165,0006508,0004175,0004298,0005575,0005634,1901565,1901564,0016787,0070011,0044248,0003824,0008233,0044237,0044238,0008150,0043170,0071704,0043161,0043632,1901575,0032991,0043231,0009057,0009056,0043227,0043229,0019941,0019538,0006511,0043226,0009987
TRINITY_DN9492_c0_g1_i5	Adenylate kinase isoenzyme 1	2.474	2.377	68.648	44.757	81.023	123.987	1835.02	38.084	27.1	1.835	222.531	1274	1
TRINITY_DN9492_c0_g1_i6	Adenylate kinase isoenzyme 1	0.22	69.741	1.339	8.147	9.336	13.737	17.083	19.556	5.179	0	14.4338	1321	1
TRINITY_DN4184_c0_g5_i3	60S acidic ribosomal protein P2-like	18.654	135.085	148.238	141.709	116.258	541.597	739.313	119.366	266.091	331.331	255.764	601	1
TRINITY_DN507_c0_g1_i1	Eukaryotic translation initiation factor 3 subunit I	214.302	240.731	134.389	214.905	129.973	354.43	391.468	315.936	208.563	427.836	263.253	1470	1
TRINITY_DN3390_c3_g1_i10	Eukaryotic translation initiation factor 3 subunit K	171.693	146.316	57.891	125.109	66.795	159.681	171.732	156.213	153.927	163.737	137.309	912	1
TRINITY_DN3390_c3_g1_i8	hypothetical protein	0.016	0	0	0	1208.02	0.046	0	0	0.021	0	120.81	2777	1
TRINITY_DN3390_c3_g1_i9	DNA damage-regulated autophagy modulator protein 2	26.843	19.505	9.085	11.68	8.711	11.909	5.211	17.049	19.957	13.51	14.346	1302	1	0043229,0044248,0009894,0010506,0031329,0005764,0009987,0044237,0009056,0110165,0043226,0008150,0006914,0031323,0050794,0019222,0005773,0005575,0043231,0043227,0000323
TRINITY_DN3390_c3_g1_i1	DNA damage-regulated autophagy modulator protein 2	0	1.442	4.029	21.519	3.311	0.569	3.574	10.414	13.372	0.481	5.8711	843	1	0043229,0044248,0009894,0010506,0031329,0005764,0009987,0044237,0009056,0110165,0043226,0008150,0006914,0031323,0050794,0019222,0005773,0005575,0043231,0043227,0000323
TRINITY_DN7174_c0_g1_i2	TRINITY_DN7174_c0_g1_i2	0.894	69.007	157.427	55.851	99.162	113.864	249.224	351.341	67.367	101.441	126.558	1156	0
TRINITY_DN7174_c0_g1_i1	TRINITY_DN7174_c0_g1_i1	0.555	72.717	111.755	121.08	71.595	54.231	151.761	193.535	47.367	82.143	90.6739	1337	0
TRINITY_DN7174_c0_g1_i3	TRINITY_DN7174_c0_g1_i3	1.126	40.534	83.026	13.214	37.311	42.78	45.594	118.022	25.021	85.503	49.2131	1348	0
TRINITY_DN15985_c0_g1_i11	BNAANNG27910D protein	5.511	173.452	355.553	321.558	426.488	486.441	187.824	232.763	292.79	238.577	272.096	6075	0
TRINITY_DN9889_c0_g1_i1	keratin, type II cytoskeletal 8-like	21.348	277.014	296.329	470.982	53.947	282.926	182.414	415.922	331.936	353.705	268.652	1430	1
TRINITY_DN5659_c0_g1_i15	NAD-dependent glycerol-3-phosphate dehydrogenase N-terminus family member	1.085	0.148	0.905	1.217	0.627	52.147	2054.52	9.903	0	0	212.055	1509	1	0047952,1901136,1901135,0009056,0097159,0019637,0046983,1902494,0009331,0005515,0000166,0048037,0009987,0016491,1901265,0006796,0006793,0044238,0005575,0050662,0051287,1901363,1990204,0005975,0046168,0003824,0004367,0046434,0044237,0006072,0110165,0008150,0071704,1901575,0052646,0032991,0042803,0042802,0003674,0036094,0005829,0016614,0016616
TRINITY_DN5659_c0_g1_i13	TRINITY_DN5659_c0_g1_i13	0	0	0.697	0	0	0	47.164	0	0	0	4.7861	261	0
TRINITY_DN5659_c0_g1_i16	NAD-dependent glycerol-3-phosphate dehydrogenase N-terminus family member	0	0	0	0	0	0.283	33.503	0	0	0	3.3786	1492	1	0047952,1901136,1901135,0009056,0097159,0019637,0046983,1902494,0009331,0005515,0000166,0048037,0009987,0016491,1901265,0006796,0006793,0044238,0005575,0050662,0051287,1901363,1990204,0005975,0046168,0003824,0004367,0046434,0044237,0006072,0110165,0008150,0071704,1901575,0052646,0032991,0042803,0042802,0003674,0036094,0005829,0016614,0016616
TRINITY_DN5659_c0_g1_i9	NAD-dependent glycerol-3-phosphate dehydrogenase N-terminus family member	0	0	0	0	0	0	19.887	0.148	0.289	0	2.0324	1352	1	0047952,1901136,1901135,0009056,0097159,0019637,0046983,1902494,0009331,0005515,0000166,0048037,0009987,0016491,1901265,0006796,0006793,0044238,0005575,0050662,0051287,1901363,1990204,0005975,0046168,0003824,0004367,0046434,0044237,0006072,0110165,0008150,0071704,1901575,0052646,0032991,0042803,0042802,0003674,0036094,0005829,0016614,0016616
TRINITY_DN5659_c0_g1_i3	hypothetical protein	0.231	0.262	0.594	1.038	0	1.354	14.036	0.125	0	0	1.764	782	1	0005575,0005829,0110165
TRINITY_DN1221_c0_g1_i18	guanine nucleotide-binding protein G T subunit alpha-1	0	0	0	0	1100.24	0	0	0.133	0.033	0	110.041	1854	1	0016818,0009966,0016817,0097159,0051339,0019001,0005515,0000166,0019935,0031683,0031279,0043949,0019932,0009987,0005102,1901265,0044877,1902531,0007165,0016787,0045761,0007188,1901363,0001664,0007187,0007186,0003824,0050790,0003924,0050794,0008150,0016462,0035556,0017111,0019933,0010646,0003674,0023051,0017076,0036094
TRINITY_DN1221_c0_g1_i17	guanine nucleotide-binding protein G T subunit alpha-1	0.029	0.079	0	0	1096.95	0	0.059	0	0	0	109.711	3072	2	0032553,0032549,0016818,0051339,0016817,0097159,0043169,0043167,0043168,0019001,0097367,0019935,0001883,0000166,0045761,0031683,0031279,0043949,0019932,0032555,0009987,0005102,0032550,0001882,1901265,0044877,0005575,1902531,0007165,0005515,0016787,0009966,0007188,1901363,0001664,0007187,0007186,0003824,0050790,0003924,0050794,0031224,0110165,0016021,0008150,0016462,0035556,0017111,0019933,0005525…
TRINITY_DN1221_c0_g1_i19	guanine nucleotide-binding protein G T subunit alpha-1	0	0	0.315	0	422.528	0	0	0	0	0	42.2843	3147	2	0032553,0032549,0016818,0051339,0016817,0097159,0043169,0043167,0043168,0019001,0097367,0019935,0001883,0000166,0045761,0031683,0031279,0043949,0019932,0032555,0009987,0005102,0032550,0001882,1901265,0044877,0005575,1902531,0007165,0005515,0016787,0009966,0007188,1901363,0001664,0007187,0007186,0003824,0050790,0003924,0050794,0031224,0110165,0016021,0008150,0016462,0035556,0017111,0019933,0005525…
TRINITY_DN1221_c0_g1_i7	guanine nucleotide-binding protein G T subunit alpha-1	0	0	0	0	129.9	0	0	0.111	0	0	13.0011	3149	3	0016818,0051339,0005525,0016817,0097159,0043169,0023051,0043167,0043168,0019001,0097367,0001883,0000166,0045761,0031683,0031279,0043949,0019932,0032555,0009987,0005102,0032550,0001882,1901265,0044877,1902531,0007165,0005515,0016787,0009966,0007188,1901363,0001664,0007187,0007186,0003824,0050790,0003924,0050794,0032553,0008150,0016462,0035556,0017111,0019933,0032549,0032561,0010646,0003674,0019935…
TRINITY_DN1221_c0_g1_i14	guanine nucleotide-binding protein G T subunit alpha-1	0	0	0	0.039	126.532	0	0	0	0	0	12.6571	3178	3	0032549,0016818,0051339,0001580,0016817,0003674,0097159,0043169,0050912,0003008,0043167,0043168,0019001,0097367,0019935,0001883,0051606,0000166,0045761,0031683,0031279,0050916,0019932,0050877,0032555,0009987,0005102,0032550,0001882,1901265,0044877,0036094,0005575,0007606,0007165,0005515,0016787,0009966,0007188,1901363,0001664,0008150,0007187,0007186,0019933,0003824,0032501,0050907,0050906,0050794…
TRINITY_DN3361_c0_g1_i14	legumain	9.391	759.915	60.078	251.385	42.43	108.26	54.39	182.087	222.387	114.225	180.455	1662	1	0051603,0004197,0006807,0051604,0019538,0044267,0009987,0140096,0044260,0006508,0004175,1901564,0016787,0070011,0003824,0008233,0008234,0044237,0044238,0008150,0043170,0071704,0006624,0003674,0016485
TRINITY_DN3361_c0_g1_i13	legumain	8.142	398.207	38.23	56.89	22.903	49.879	20.852	82.689	76.146	83.846	83.7784	840	1	0042246,0031175,0051603,0006807,0004197,0051604,0030030,0019538,0044267,0009987,0140096,0044260,0006508,0004175,0120036,0031099,0016787,0070011,0048589,0048856,0009888,0003824,0032502,0008233,0031102,0031103,0044237,0044238,0008150,0043170,0071704,0061564,0006624,0003674,0016043,0008234,0048678,0016485,0009611,1901564,0071840
TRINITY_DN8286_c0_g1_i21	cytochrome c oxidase polypeptide	157.609	141.623	201.683	106.228	139.896	805.958	265.011	102.388	49.032	51.539	202.097	963	1	0015075,0051234,0015077,0098662,0098660,0015078,0006812,0009060,0045333,0015980,0016020,0055085,0009987,0006091,0016491,0110165,0031090,0015002,0005575,0055114,0022857,0051179,0031966,0003824,0019646,0044237,0022890,0098655,0006811,0008150,0016676,0005743,0034220,0015672,0006123,0016675,1902600,0008324,0003674,0009055,0004129,0022900,0019866,0022904
TRINITY_DN8286_c0_g1_i18	cytochrome c oxidase polypeptide	13.479	62.637	69.6	55.352	43.338	205.75	94.679	29.85	16.953	8.129	59.9767	1045	1	0015075,0051234,0015077,0098662,0098660,0015078,0006812,0009060,0045333,0015980,0016020,0055085,0009987,0006091,0016491,0110165,0031090,0015002,0005575,0055114,0022857,0051179,0031966,0003824,0019646,0044237,0022890,0098655,0006811,0008150,0016676,0005743,0034220,0015672,0006123,0016675,1902600,0008324,0003674,0009055,0004129,0022900,0019866,0022904
TRINITY_DN8286_c0_g1_i5	endonuclease 4	0.176	0.04	0.034	22.045	0.044	0	0.18	0	0	0.098	2.2617	1628	0
TRINITY_DN187_c0_g1_i3	regenerating islet-derived protein 4	0.301	2424.54	2.118	32.492	1.205	1.517	0	0.674	0.789	2.341	246.597	629	1	0038023,0003674
TRINITY_DN187_c0_g1_i1	C-type lectin domain-containing protein	0	35.917	0	0.116	0	0	0	0	0.038	0	3.6071	1713	3
TRINITY_DN187_c0_g1_i4	SI DKEY-9I23 4 -like	0.039	15.831	0	1.123	0	0	0	0	0	0.394	1.7387	1288	2
TRINITY_DN187_c0_g1_i5	regenerating islet-derived protein 4	0	13.726	0	0.531	0	0	0	0	0	0	1.4257	876	1	0038023,0003674
TRINITY_DN667_c0_g1_i9	sodium/potassium-transporting ATPase subunit alpha-1	88.019	67.219	802.986	59.281	87.011	40.794	6.097	12.417	27.24	3.114	119.418	1421	1	0051234,0015672,0098660,0055085,1902600,0009987,0051179,0034220,0006812,0098662,0098655,0006811,0008150
TRINITY_DN667_c0_g1_i8	sodium/potassium-transporting ATPase subunit alpha	0.044	2.033	136.976	2.827	177.327	99.82	8.228	40.86	4.942	0.05	47.3107	3016	1	0051234,0015672,0098660,0055085,1902600,0009987,0051179,0034220,0006812,0098662,0098655,0006811,0008150
TRINITY_DN667_c0_g1_i5	sodium/potassium-transporting ATPase subunit alpha	0.471	101.054	3.271	121.909	17.499	17.478	8.504	10.175	13.227	7.216	30.0804	1807	1	0051234,0015672,0098660,0055085,1902600,0009987,0051179,0034220,0006812,0098662,0098655,0006811,0008150
TRINITY_DN667_c0_g1_i10	sodium/potassium-transporting ATPase subunit alpha-2	8.957	92.918	35.385	65.681	8.706	11.459	9.066	6.619	5.793	5.174	24.9758	2855	1	0051234,0015672,0098660,0055085,1902600,0009987,0051179,0034220,0006812,0098662,0098655,0006811,0008150
TRINITY_DN667_c0_g1_i7	sodium/potassium-transporting ATPase subunit alpha	0.261	88.96	3.055	57.841	10.441	15.175	10.011	7.882	8.311	5.935	20.7872	2524	1	0015075,0051234,0015077,0098662,0098660,0015079,0030554,0097159,0022890,0043167,0097367,0043169,0043168,1901265,0000166,0016021,0055085,0032559,0008556,0032555,0009987,0110165,0008144,0005575,0015662,0042625,0042626,1901363,0022857,0051179,0022853,0034220,0031224,0006812,0032553,0098655,0006811,0008150,0015672,0005524,1902600,0008324,0003674,0015399,0035639,0022804,0017076,0036094,0046872,0046873…
TRINITY_DN667_c0_g1_i12	sodium/potassium-transporting ATPase subunit alpha	0	0	4.402	0.039	0.658	0.147	177.391	0.932	0	0	18.3569	1741	1	0051234,0015672,0098660,0055085,1902600,0009987,0051179,0034220,0006812,0098662,0098655,0006811,0008150
TRINITY_DN667_c0_g1_i4	sodium/potassium-transporting ATPase subunit alpha-2	0.079	0	4.182	0.06	0.639	0	102.346	0.428	0	0	10.7734	2855	1	0051234,0015672,0098660,0055085,1902600,0009987,0051179,0034220,0006812,0098662,0098655,0006811,0008150
TRINITY_DN667_c0_g1_i11	sodium/potassium-transporting ATPase subunit alpha	0.367	0	20.538	0	2.496	0	0	0	0	0	2.3401	2502	1	0051234,0015672,0098660,0055085,1902600,0009987,0051179,0034220,0006812,0098662,0098655,0006811,0008150
TRINITY_DN729_c1_g1_i24	beta-taxilin-like	0	0.051	0.625	0.181	1.95	151.215	729.274	5.398	0	0	88.8694	1332	1	0000149,0019905,0003674,0005515
TRINITY_DN729_c1_g1_i19	alpha-taxilin-like	0	0	0.141	0	0	53.38	549.483	5.747	0	0	60.8751	2316	1	0000149,0019905,0003674,0005515
TRINITY_DN729_c1_g1_i13	vitelline membrane protein VM26AB -like	0	0	0	0	0	65.501	279.237	2.144	0	0	34.6882	338	1
TRINITY_DN729_c1_g1_i22	alpha-taxilin-like	0	0	0	0	0.607	30.144	136.789	0	0	0	16.754	2436	1	0000149,0019905,0003674,0005515
TRINITY_DN729_c1_g1_i23	beta-taxilin-like	0.034	0	0.061	0.12	0	21.907	108.127	2.144	0	0	13.2393	1452	1	0000149,0019905,0003674,0005515
TRINITY_DN729_c1_g1_i5	alpha-taxilin-like	0	0	0	0	0.073	21.103	97.689	0.618	0	0	11.9483	2345	1	0000149,0019905,0003674,0005515
TRINITY_DN6374_c0_g2_i1	NADH dehydrogenase ubiquinone iron-sulfur protein 5	97.03	107.026	180.323	123.224	282.967	935.591	581.425	123.272	101.3	44.77	257.693	570	1	0030964,0005747,0032991,1990204,0098796,0098803,0098800,0045271,1902494,0005575
[truncated: 73,577 more rows]

## Sheet: Readme
The expression values in this table are in normalized TPM units.
General per-sample normalization results are presented in Table 1 and the normalization procedure is described in Supplementary Table 1
Tissue origin and accession numbers of the samples:
sample_name	tissue	biosample accession	SRA accession
G	gonad	SAMN15147518	SRR11936462
jel	intestine	SAMN15147519	SRR11936461
Mozg	brain	SAMN15147520	SRR11936460
Ngl	headkidney	SAMN15147521	SRR11936459
oko	eye	SAMN15147522	SRR11936458
se	heart	SAMN15147523	SRR11936457
[truncated: 4 more rows]
