# Supplementary figures and images for: A de novo Transcriptome Assembly of the European Flounder (Platichthys flesus): The Preselection of Transcripts Encoding Active Forms of Enzymes
Source: Frontiers journal article supplement (doi:10.3389/fmars.2021.618779), 2021-02-18

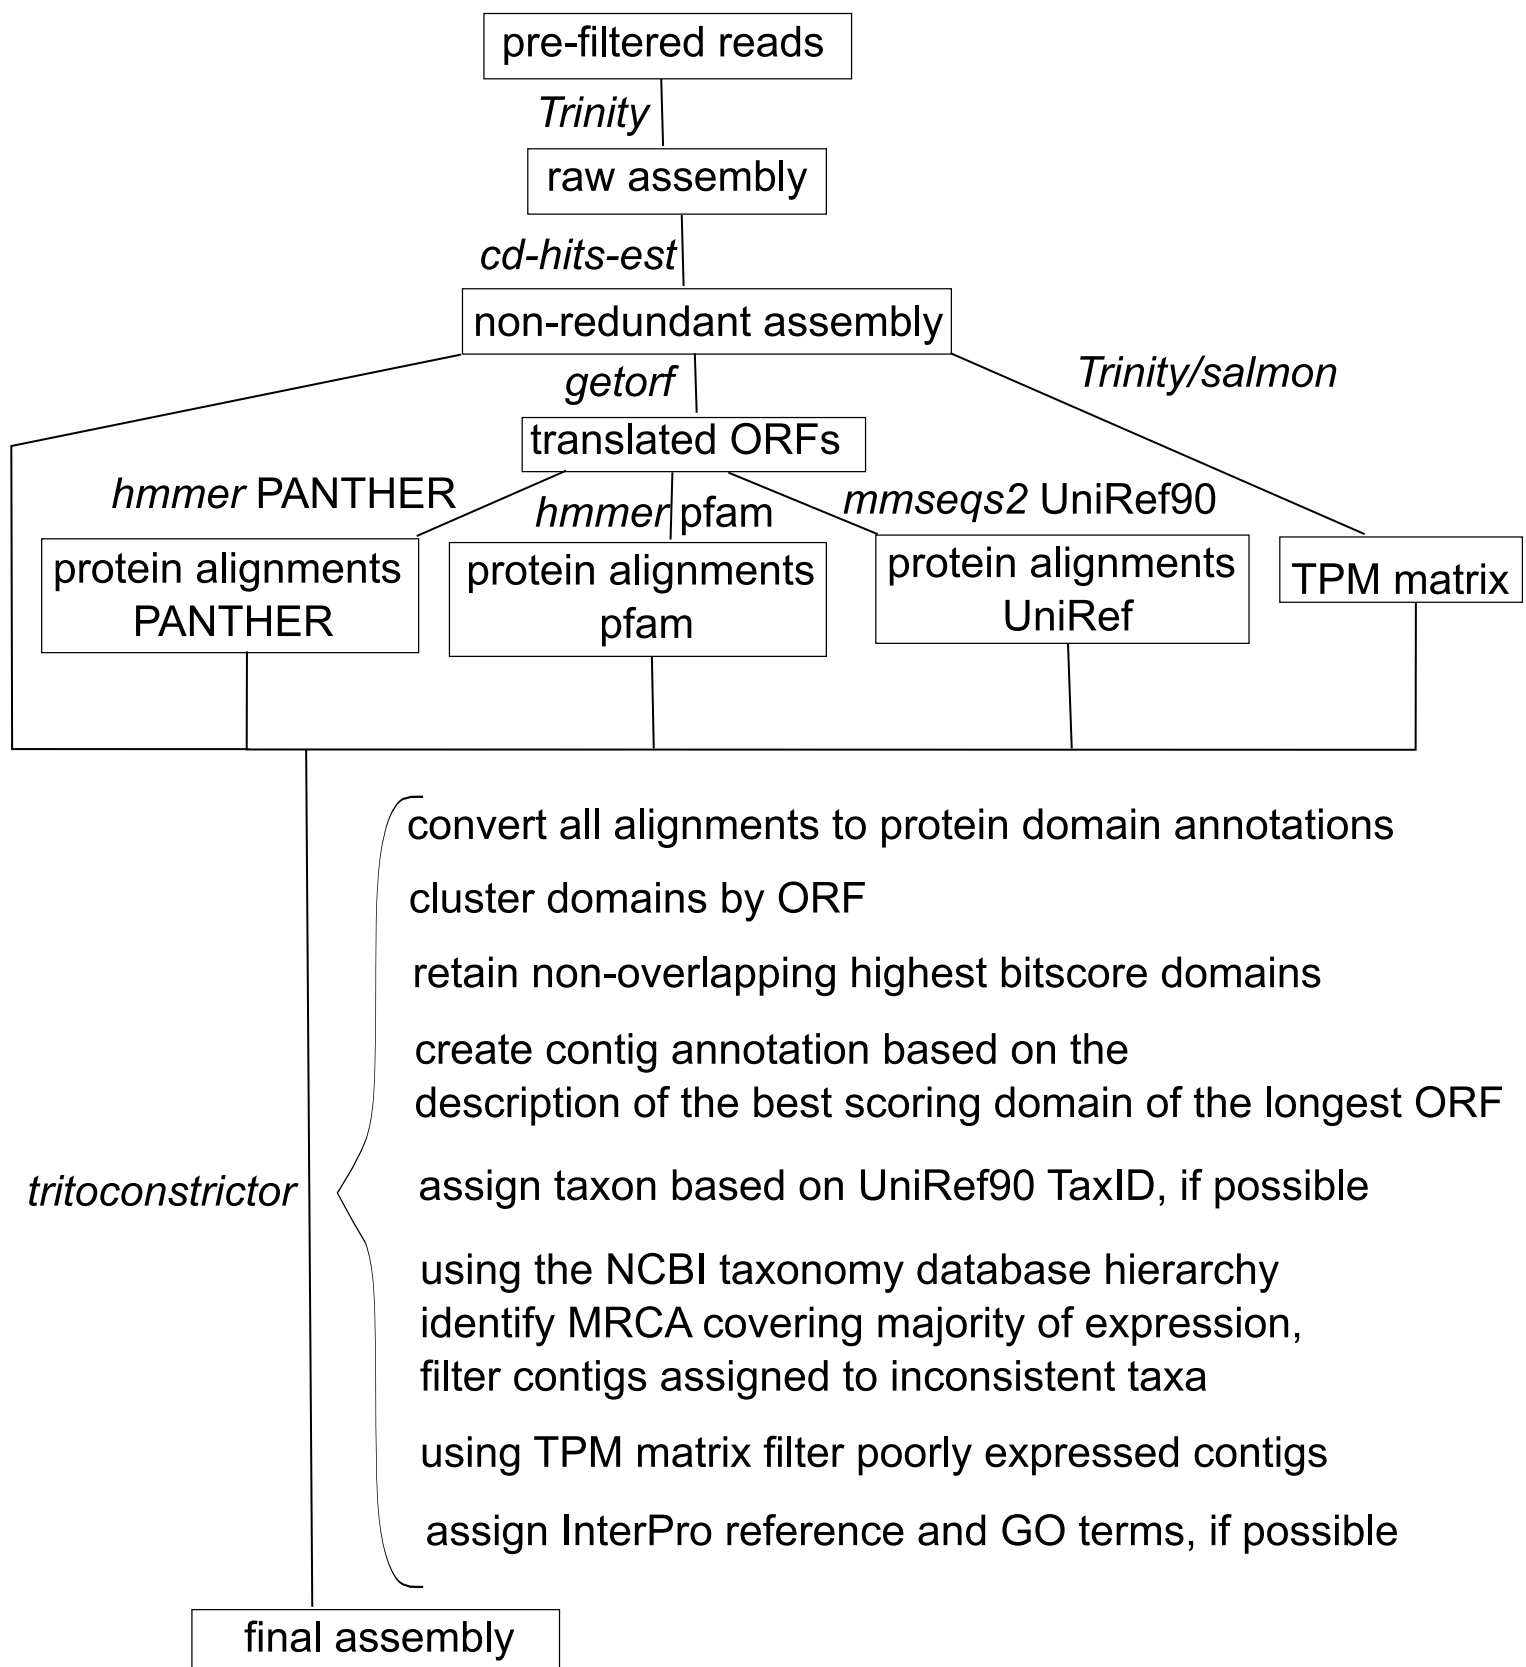

Supplementary Figure 2. Simplified overview of assembly annotation and filtering workflow

Supplement: Data_Sheet_4.PDF [file Data_Sheet_4.PDF]
